# Supplementary material for: Variable Suites of Non-effector Genes Are Co-regulated in the Type III Secretion Virulence Regulon across the Pseudomonas syringae Phylogeny
Source: PLoS Pathog. 2014 Jan 2;10(1):e1003807. doi: 10.1371/journal.ppat.1003807 (PMC3879358; doi:10.1371/journal.ppat.1003807)
Supplement: Table S1 — Raw bootstrapped GENE-counter results for each strain. (XLSX) [file ppat.1003807.s011.xlsx]

## Sheet: Pph1448A
Query locus tag	median_1:EV norm	median_3:EV norm	median_2:HrpL norm	median_4:HrpL norm	median_P-val	median_Q-val	b_value	b_value_UL	b_value_LL	Query annotation
PSPPH_1278	20	47.5	1571	4379	1.9818e-61	9.67928e-58	1	1	0.978362	type III secretion component protein HrpF
PSPPH_1272	103	268	17190	23889	2.51599e-60	6.66241e-57	1	1	0.978362	type III helper protein HrpA2
PSPPH_1294	40	52	3194	3521	1.37912e-58	2.3364e-55	1	1	0.978362	RNA polymerase sigma factor HrpL
PSPPH_1273	132	191	6074	8192	2.49492e-48	3.12993e-45	1	1	0.978362	type III helper protein HrpZ1
PSPPH_3499	13	13	344	717	9.93605e-45	1.00255e-41	1	1	0.978362	type III chaperone protein ShcF
PSPPH_1280	61	71	1044	1990	2.13048e-39	1.73913e-36	1	1	0.978362	type III outer membrane protein HrcC
PSPPH_1264	46	53	900	1286	1.72236e-38	1.21979e-35	1	1	0.978362	type III helper protein HrpW1
PSPPH_1274	33	41	656	989	2.9545e-38	2.10781e-35	1	1	0.978362	type III secretion component protein HrpB
PSPPH_A0113	133	117	1824	3292	5.25447e-37	3.05108e-34	1	1	0.978362	syringolide biosynthetic protein AvrD1
PSPPH_1275	63	56	946	1269	6.42932e-36	3.31201e-33	1	1	0.978362	type III secretion component protein HrcJ
PSPPH_3498	39	52	493	1056	1.06557e-33	4.63272e-31	1	1	0.978362	type III effector HopF3
PSPPH_4366	38	43	485	868	1.61212e-33	7.09675e-31	1	1	0.978362	type III effector HopI1
PSPPH_1296	50	55	543	1141	5.00994e-33	2.11444e-30	1	1	0.978362	type III effector HopX1
PSPPH_1281	32	59	399	944	2.10742e-31	7.40383e-29	1	1	0.978362	type III negative regulator of hrp expression HrpV
PSPPH_1289	5	8	126	224	2.20251e-30	7.00378e-28	1	1	0.978362	type III secretion component protein HrpO
PSPPH_4991	23	27	211	535	7.27411e-30	2.20314e-27	1	1	0.978362	glycosyl hydrolase family protein
PSPPH_5227	3	3	69	166	3.16185e-29	9.28663e-27	1	1	0.978362	HrpT
PSPPH_1293	25.5	24	249	437	1.40112e-28	3.85545e-26	1	1	0.978362	type III secretion component protein HrcJ
PSPPH_1279	15	18	170	320	9.16043e-28	2.44847e-25	1	1	0.978362	type III secretion component protein HrpG
PSPPH_4326	197	196	1468	3135	2.44181e-27	6.24569e-25	1	1	0.978362	type III effector HopAE1
PSPPH_1291	30	24	271	423	2.41409e-27	6.34508e-25	1	1	0.978362	type III secretion component protein HrpQ
PSPPH_1295	161	136	1158	2163	6.64415e-27	1.55342e-24	1	1	0.978362	type III effector HrpK1
PSPPH_A0122	358	363	2591.5	5964	1.15955e-26	2.70017e-24	1	1	0.978362	type III effector HopAW1
PSPPH_3028	34	29	202	450	2.47241e-24	5.15225e-22	1	1	0.978362	type III effector AvrB4-1
PSPPH_3759	266	221	1731	2610	7.96441e-23	1.47928e-20	1	1	0.978362	zinc-binding oxidoreductase
PSPPH_1290	46	45	302	514	9.11523e-23	1.70739e-20	1	1	0.978362	type III secretion component protein HrcN
PSPPH_3756	81	77	505.5	858	9.67089e-23	1.79121e-20	1	1	0.978362	hypothetical protein PSPPH_3756
PSPPH_0767	216.5	164	1216	2065	1.63623e-22	2.85672e-20	1	1	0.978362	type III effector HopG1
PSPPH_3758	77.5	43	443	584	2.60355e-22	4.42166e-20	1	1	0.978362	riboflavin biosynthesis protein RibD domain-containing protein
PSPPH_0171	611.5	539	3967	6323	1.03041e-21	1.68646e-19	1	1	0.978362	type III effector HopR1
PSPPH_1286	8	11	85	160	1.51425e-21	2.51571e-19	1	1	0.978362	type III secretion component protein HrcQb
PSPPH_1443	114.5	91	580	996	5.9847e-21	8.98154e-19	1	1	0.978362	type III effector HopAF1
PSPPH_1276	25	19	155	248	7.98069e-21	1.2169e-18	1	1	0.978362	type III secretion component protein HrpD
PSPPH_A0055	35	30	158	383	1.49272e-20	2.21705e-18	1	1	0.978362	hypothetical protein PSPPH_A0055
PSPPH_1269	32	34	161	364	7.39856e-20	1.07297e-17	1	1	0.978362	lytic murein transglycosylase
PSPPH_1288	9	3	60	118	1.13062e-19	1.56286e-17	1	1	0.978362	type III secretion protein HrpP
PSPPH_1277	26	25	133	270	6.44112e-19	8.8012e-17	1	1	0.978362	type III secretion component protein HrpE
PSPPH_A0129	292	259	1575	2154	1.48059e-18	1.96707e-16	1	1	0.978362	virulence surface antigen protein
PSPPH_3757	63	42	261	453	2.01287e-18	2.60958e-16	1	1	0.978362	hydrolase, haloacid dehalogenase-like family protein
PSPPH_1287	8	15	82.5	145	2.21619e-18	2.82853e-16	1	1	0.978362	type III secretion component protein HrcQa
PSPPH_A0120	216.5	166	672	1740	9.82206e-18	1.23207e-15	1	1	0.978362	type III effector AvrB2
PSPPH_3497	13	7	59	135	4.2044e-17	5.05029e-15	1	1	0.978362	transposase, truncated
PSPPH_A0031	676	781	3587	5657	1.27885e-16	1.52112e-14	1	1	0.978362	type III effector HopAU1
PSPPH_1292	97	98	409	705	2.42187e-16	2.80903e-14	1	1	0.978362	type III secretion component protein HrcV
PSPPH_A0010	802	706	3293	4798	2.2965e-14	2.52743e-12	1	1	0.978362	type III effector HopD1
PSPPH_A0111	54	27	150	275	4.79528e-14	5.27154e-12	1	1	0.978362	hypothetical protein PSPPH_A0111
PSPPH_A0112	441	304	1177	2343	2.9154e-13	3.1135e-11	1	1	0.978362	phosphoglycerate mutase family protein
PSPPH_1265	23	15	74	144	5.0005e-13	5.30347e-11	1	1	0.978362	type III chaperone protein ShcM
PSPPH_A0130	101	68	348	402	1.44996e-12	1.48731e-10	1	1	0.978362	hypothetical protein PSPPH_A0130
PSPPH_A0110	841	653	2350	4373	3.94502e-12	3.93984e-10	1	1	0.978362	hypothetical protein PSPPH_A0110
PSPPH_0763	249	244	914	1164	6.21347e-12	6.14297e-10	1	1	0.978362	type III helper protein HopAJ1
PSPPH_1285	11	14	53	101	7.32584e-12	7.27406e-10	1	1	0.978362	type III secretion system protein
PSPPH_A0056	510	553	1373	3200	8.29125e-12	8.03583e-10	1	1	0.978362	type III effector HopAV1
PSPPH_A0032	52	46	148	238	2.57355e-10	2.40437e-08	1	1	0.978362	transposase family protein, truncated
PSPPH_A0109	642	489	1457	2673	8.71181e-10	7.96008e-08	1	1	0.978362	sulfotransferase, putative
PSPPH_1282	23	31	87	122	5.76163e-09	5.15495e-07	1	1	0.978362	type III secretion component protein HrcU
PSPPH_1906	37	40	101	180	6.2238e-09	5.50861e-07	1	1	0.978362	LuxR family DNA-binding response regulator
PSPPH_5225	69	61	185	212	1.14558e-07	9.87951e-06	1	1	0.978362	type III effector HopAT1
PSPPH_1283	8	7	26	47	2.33557e-07	2.00412e-05	1	1	0.978362	type III secretion component protein HrcT
PSPPH_A0133	685	708	1480	2253	2.12021e-06	0.000176471	1	1	0.978362	shikimate kinase
PSPPH_A0012	1244	1339	2330.5	4658	2.76349e-06	0.000227743	1	1	0.978362	type III effector HopQ1
PSPPH_1284	5	5	22	31	3.69225e-06	0.000301192	1	1	0.978362	type III secretion component protein HrcS
PSPPH_1297	112	158	227.5	428	1.21006e-05	0.000960482	1	1	0.978362	serine-aspartate repeat-containing protein
PSPPH_0462	80	62	158	180	3.2435e-05	0.00247931	1	1	0.978362	coproporphyrinogen III oxidase
PSPPH_2352	38	31	80	95	3.76673e-05	0.00282101	0.996667	0.999609	0.972231	type III chaperone protein ShcV
PSPPH_A0127	1093	1005	1759.5	3165	4.65846e-05	0.00348932	1	1	0.978362	type III effector HopAB1
PSPPH_1855	90	81	180	217	4.66261e-05	0.00350959	1	1	0.978362	thiamine biosynthesis lipoprotein
PSPPH_1444	34	28	67	92	5.03428e-05	0.00379074	0.986667	0.996025	0.956248	transposase, truncated
PSPPH_0762	84	94	179	231	5.90847e-05	0.00444723	1	1	0.978362	hypothetical protein PSPPH_0762
PSPPH_A0106	734	470	1105	1560	0.000103444	0.00748908	1	1	0.978362	hypothetical protein PSPPH_A0106
PSPPH_2351	45	46	87	124	0.000108495	0.00788836	0.963333	0.982715	0.9239	type III effector HopV1
PSPPH_A0011	67	71	135	171	0.00015676	0.010801	0.97	0.986906	0.932755	hypothetical protein PSPPH_A0011
PSPPH_A0108	1860	1596.5	3067	4580	0.000182204	0.0127115	1	1	0.978362	adenosylmethionine-8-amino-7-oxononanoate aminotransferase
PSPPH_4359	406.5	487	974	922	0.000210339	0.014437	1	1	0.978362	hypothetical protein PSPPH_4359
PSPPH_A0033	85.5	102	163	236	0.000281063	0.0189375	0.893333	0.931021	0.838624	trbA protein, truncated
PSPPH_1267	17	12	28	47	0.000522601	0.0343108	0.606667	0.676251	0.532466	type III chaperone protein AvrF
PSPPH_0382	200	204	422	374	0.000743037	0.0481285	0.526667	0.599536	0.452643	ATP-dependent protease peptidase subunit
PSPPH_A0105	211	161	311	415	0.000873564	0.0561209	0.423333	0.49769	0.352294	carbon storage regulator-related protein
PSPPH_0742	1166	1050	2459	1945	0.000947037	0.0602356	0.213333	0.280115	0.158957	clpB protein
PSPPH_A0107	1430	1394	2259	3333	0.00113566	0.071442	0.0633333	0.109834	0.0357295	SanC, putative
PSPPH_5226	12	9	16	39	0.00139262	0.0858713	0.293333	0.364926	0.230684	HrpL-regulated protein
PSPPH_3432	428.5	683	267	322	0.0015876	0.0976509	0.05	0.0932423	0.0262317	4-hydroxybenzoate 3-monooxygenase
PSPPH_1268	110	92	162	218	0.00219051	0.131186	0.103333	0.157507	0.0663254	type III effector AvrE1
PSPPH_0381	556.5	524	1063	905	0.00302809	0.177878	0	0.0216378	1.73472e-18	ATP-dependent protease ATP-binding subunit HslU
PSPPH_4184	58	218	104	396	0.00322227	0.189261	0.00666667	0.0333799	0.00130266	osmotically inducible protein
PSPPH_2581	115	110	147	258	0.00360176	0.206457	0.0133333	0.0437521	0.00397538	lipoprotein
PSPPH_A0087	458.5	464	647	1013	0.00362634	0.209201	0	0.0216378	1.73472e-18	type III effector AvrRps4
PSPPH_4830	19	20	7	7	0.00369799	0.210978	0.136667	0.195664	0.093393	cation efflux family protein
PSPPH_3941	377.5	371	708	627	0.00385272	0.21891	0	0.0216378	1.73472e-18	ATP-dependent protease La
PSPPH_0461	38	45	62	97	0.0039736	0.228017	0.0666667	0.113915	0.0381713	hypothetical protein PSPPH_0461
PSPPH_4207	887	843	1689	1373	0.00538758	0.296697	0	0.0216378	1.73472e-18	heat shock protein GrpE
PSPPH_4078	1270	1208	2245	2065	0.00753221	0.400771	0	0.0216378	1.73472e-18	co-chaperonin GroES
PSPPH_3755	245	205	367	390	0.00928653	0.482609	0	0.0216378	1.73472e-18	L-2,4-diaminobutyrate decarboxylase
PSPPH_4482	565	515	1039	780	0.0099777	0.508218	0	0.0216378	1.73472e-18	curved-DNA-binding protein
PSPPH_4553	155	155	98	83	0.00982854	0.508985	0	0.0216378	1.73472e-18	major facilitator family protein
PSPPH_1524	39	31	42	85	0.0103108	0.524792	0.00666667	0.0333799	0.00130266	phage integrase family site specific recombinase
PSPPH_0655	590	395	1011	637	0.0106161	0.540831	0	0.0216378	1.73472e-18	prophage PSPPH01 cellulase
PSPPH_4206	5522	5326	10056	8946	0.0107968	0.541198	0	0.0216378	1.73472e-18	molecular chaperone DnaK
PSPPH_0659	74	60	136	93	0.0117483	0.581128	0	0.0216378	1.73472e-18	hypothetical protein PSPPH_0659
PSPPH_A0061	261	242	364	467	0.0121593	0.597198	0	0.0216378	1.73472e-18	ISPsy26, transposase orfB
PSPPH_0122	262	351	432	575	0.0128205	0.625976	0	0.0216378	1.73472e-18	hypothetical protein PSPPH_0122
PSPPH_A0125	79	61	94	143	0.013247	0.635681	0	0.0216378	1.73472e-18	hypothetical protein PSPPH_A0125
PSPPH_0660	85	58	133	107	0.0136115	0.647277	0	0.0216378	1.73472e-18	prophage PSPPH01 tail protein
PSPPH_1949	519.5	569	947	840	0.0140645	0.672497	0	0.0216378	1.73472e-18	HSP20 family protein
PSPPH_0128	39	56	73	90	0.0144006	0.685441	0.00333333	0.0277687	0.000391473	lipoprotein
PSPPH_1987	4607.5	3860	7568.5	6827	0.014555	0.689426	0	0.0216378	1.73472e-18	heat shock protein 90
PSPPH_2291	76	53	45	28	0.0158388	0.733444	0	0.0216378	1.73472e-18	nickel ABC transporter permease
PSPPH_1519	125	124	182	220	0.0175519	0.804878	0	0.0216378	1.73472e-18	MarR family transcriptional regulator
PSPPH_0131	120	128.5	158	242	0.0187573	0.849101	0	0.0216378	1.73472e-18	ImpG
PSPPH_2582	475	603	611	1101	0.0216041	0.952118	0	0.0216378	1.73472e-18	TerC family membrane protein
PSPPH_5072	382	393	480	478	0.292113	1	0	0.0216378	1.73472e-18	RHS family protein
PSPPH_2754	101	98	71	92	0.354723	1	0	0.0216378	1.73472e-18	achromobactin biosynthetic protein AcsC
PSPPH_1187	127	122	141	137	0.590167	1	0	0.0216378	1.73472e-18	DNA-binding transcriptional regulator HexR
PSPPH_1921	48	77	39	74	0.661933	1	0	0.0216378	1.73472e-18	peptidase
PSPPH_4511	285	236	263	257	0.908392	1	0	0.0216378	1.73472e-18	thioredoxin
PSPPH_0671	221	166	189	136	0.393193	1	0	0.0216378	1.73472e-18	prophage PSPPH01, ImpB/MucB/SamB family protein
PSPPH_2324	102	241	100	224	0.789682	1	0	0.0216378	1.73472e-18	peptidyl-prolyl cis-trans isomerase C
PSPPH_1552	54	75	50	57	0.413637	1	0	0.0216378	1.73472e-18	hypothetical protein PSPPH_1552
PSPPH_4919	173	139	172	139	0.886157	1	0	0.0216378	1.73472e-18	yibQ gene product
PSPPH_0325	318	268	292	243	0.65032	1	0	0.0216378	1.73472e-18	hypothetical protein PSPPH_0325
PSPPH_1221	108	92	101	83	0.702137	1	0	0.0216378	1.73472e-18	cyclohexadienyl dehydratase
PSPPH_1782	739	310.5	508	297	0.182234	1	0	0.0216378	1.73472e-18	mechanosensitive ion channel family protein
PSPPH_0423	56	47	41	46	0.493403	1	0	0.0216378	1.73472e-18	hypothetical protein PSPPH_0423
PSPPH_0775	57	40	44	33	0.350509	1	0	0.0216378	1.73472e-18	periplasmic chaperone protein
PSPPH_3976	64	55	64	49	0.81153	1	0	0.0216378	1.73472e-18	allophanate hydrolase
PSPPH_1685	16	21	15	27	0.718607	1	0	0.0216378	1.73472e-18	hypothetical protein PSPPH_1685
PSPPH_1229	75	78	69	63	0.512526	1	0	0.0216378	1.73472e-18	sensory box-containing diguanylate cyclase
PSPPH_3239	301	225	243	173	0.248721	1	0	0.0216378	1.73472e-18	ThiJ/PfpI family protein
PSPPH_5185	18	25	18	19	0.654853	1	0	0.0216378	1.73472e-18	iron compound ABC transporter iron compound-binding protein
PSPPH_3915	53	201	64	273	0.163144	1	0	0.0216378	1.73472e-18	50S ribosomal protein L31 type B
PSPPH_5025	32	30	36	27	0.849571	1	0	0.0216378	1.73472e-18	hypothetical protein PSPPH_5025
PSPPH_4983	147	149	126	121	0.389088	1	0	0.0216378	1.73472e-18	prophage PSPPH06 tail tape meausure domain-containing protein
PSPPH_0401	159	127	157	141	0.850841	1	0	0.0216378	1.73472e-18	amidase family protein
PSPPH_2847	379	292	305.5	212	0.187175	1	0	0.0216378	1.73472e-18	general secretion pathway protein GspK
PSPPH_3502	78	154	85	147	0.900817	1	0	0.0216378	1.73472e-18	hypothetical protein PSPPH_3502
PSPPH_4352	120	83.5	94	89	0.618825	1	0	0.0216378	1.73472e-18	histone deacetylase family protein
PSPPH_2106	73	56	85	66	0.47715	1	0	0.0216378	1.73472e-18	TetR family transcriptional regulator
PSPPH_4422	33	48	23	39	0.284343	1	0	0.0216378	1.73472e-18	mutT/nudix family protein
PSPPH_3625	209	244	246	225	0.856784	1	0	0.0216378	1.73472e-18	hypothetical protein PSPPH_3625
PSPPH_1159	542	494	548	489	0.94034	1	0	0.0216378	1.73472e-18	hypothetical protein PSPPH_1159
PSPPH_2107	89.5	64	93	57	0.853869	1	0	0.0216378	1.73472e-18	shikimate 5-dehydrogenase
PSPPH_0632	151	171.5	188	159	0.731154	1	0	0.0216378	1.73472e-18	ApaG
PSPPH_0915	11	10	15	17	0.288562	1	0	0.0216378	1.73472e-18	MotA/TolQ/ExbB proton channel family protein
PSPPH_3559	35	32	35	23	0.622718	1	0	0.0216378	1.73472e-18	hypothetical protein PSPPH_3559
PSPPH_3344	319	283	267	249	0.445385	1	0	0.0216378	1.73472e-18	iron-sulfur cluster-binding protein
PSPPH_2204	299	251	239	229	0.431184	1	0	0.0216378	1.73472e-18	TetR family transcriptional regulator
PSPPH_0680	82	87	111	145	0.0469319	1	0	0.0216378	1.73472e-18	HIT family protein
PSPPH_0678	457	481	548	606	0.304582	1	0	0.0216378	1.73472e-18	S-adenosylmethionine decarboxylase
PSPPH_3574	2867.5	3224	2942	3252	0.938582	1	0	0.0216378	1.73472e-18	sugar transporter
PSPPH_0083	72	95	70	80	0.663692	1	0	0.0216378	1.73472e-18	metallo-beta-lactamase family protein
PSPPH_0823	134	110	131.5	96	0.76833	1	0	0.0216378	1.73472e-18	hypothetical protein PSPPH_0823
PSPPH_0667	620	532	743	619	0.396547	1	0	0.0216378	1.73472e-18	prophage PSPPH01, site-specific recombinase phage integrase family protein
PSPPH_3670	201	274	198	212	0.474438	1	0	0.0216378	1.73472e-18	3-demethylubiquinone-9 3-methyltransferase
PSPPH_5103	53	69	78	63	0.536534	1	0	0.0216378	1.73472e-18	hypothetical protein PSPPH_5103
PSPPH_1940	19	20	33	27	0.103957	1	0	0.0216378	1.73472e-18	hypothetical protein PSPPH_1940
PSPPH_1430	349	282	346	325	0.758283	1	0	0.0216378	1.73472e-18	leucine-rich repeat-containing protein
PSPPH_3688	575.5	603	577	637	0.881206	1	0	0.0216378	1.73472e-18	hypothetical protein PSPPH_3688
PSPPH_1302	2664	2325.5	2670	2158	0.874794	1	0	0.0216378	1.73472e-18	preprotein translocase subunit SecD
PSPPH_0588	149	137	157.5	139	0.843556	1	0	0.0216378	1.73472e-18	nicotinate phosphoribosyltransferase
PSPPH_1199	106	67	90	71	0.76042	1	0	0.0216378	1.73472e-18	fimbrial protein
PSPPH_1533	250	208	242	179	0.680168	1	0	0.0216378	1.73472e-18	SirA domain-containing protein
PSPPH_0935	82	56	66	51	0.472151	1	0	0.0216378	1.73472e-18	TRAP dicarboxylate transporter, DctP subunit
PSPPH_2302	72	66	93	59	0.667185	1	0	0.0216378	1.73472e-18	phytanoyl-CoA dioxygenase
PSPPH_2096	76	79	69	72	0.708391	1	0	0.0216378	1.73472e-18	protocatechuate 3,4-dioxygenase subunit beta
PSPPH_2066	1071	733	1057	928	0.641094	1	0	0.0216378	1.73472e-18	CmpX
PSPPH_1248	47	46.5	42	45	0.779807	1	0	0.0216378	1.73472e-18	hypothetical protein PSPPH_1248
PSPPH_1849	236	211	255	224	0.735873	1	0	0.0216378	1.73472e-18	helicase/SNF2 domain-containing protein
PSPPH_2404	278	208	290.5	224	0.774775	1	0	0.0216378	1.73472e-18	molybdate ABC transporter permease
PSPPH_0100	58	33	53	41	0.841975	1	0	0.0216378	1.73472e-18	recombinase
PSPPH_3813	472	353	408	302	0.447698	1	0	0.0216378	1.73472e-18	tRNA pseudouridine synthase D
PSPPH_2870	228	210	232	235	0.755355	1	0	0.0216378	1.73472e-18	major facilitator family transporter
PSPPH_3515	322	330.5	350	362	0.667046	1	0	0.0216378	1.73472e-18	succinylglutamate desuccinylase
PSPPH_3106	87	101	107	131	0.266071	1	0	0.0216378	1.73472e-18	acetyltransferase
PSPPH_0980	428	382	454	412	0.73687	1	0	0.0216378	1.73472e-18	alkaline protease secretion ATP-binding protein AprD
PSPPH_4581	8283.5	10063.5	7209.5	8751	0.526168	1	0	0.0216378	1.73472e-18	50S ribosomal protein L24
PSPPH_1233	116	79	97	67	0.453968	1	0	0.0216378	1.73472e-18	GntR family transcriptional regulator
PSPPH_2987	24	14	22	19	0.791729	1	0	0.0216378	1.73472e-18	tonB protein
PSPPH_0809	490.5	502	486	413	0.623834	1	0	0.0216378	1.73472e-18	NADH dehydrogenase
PSPPH_4753	59	47	60	47	0.842836	1	0	0.0216378	1.73472e-18	sarcosine oxidase subunit alpha
PSPPH_2980	106	73	71	39	0.0266983	1	0	0.0216378	1.73472e-18	two-component system sensor protein
PSPPH_1222	464	742	511	550	0.520747	1	0	0.0216378	1.73472e-18	ArsR family transcriptional regulator
PSPPH_5053	136	187	151	106	0.271416	1	0	0.0216378	1.73472e-18	aminotransferase, class V
PSPPH_3417	345	265	328	264	0.8735	1	0	0.0216378	1.73472e-18	hypothetical protein PSPPH_3417
PSPPH_4318	3342.5	2489	2987.5	2443	0.732942	1	0	0.0216378	1.73472e-18	hypothetical protein PSPPH_4318
PSPPH_0353	171	216	198	154	0.639853	1	0	0.0216378	1.73472e-18	fructose-1,6-bisphosphatase
PSPPH_2854	60	40	60	42	0.834336	1	0	0.0216378	1.73472e-18	hypothetical protein PSPPH_2854
PSPPH_2635	37	40	35	42	0.865549	1	0	0.0216378	1.73472e-18	acetyltransferase
PSPPH_2384	130	134	119	107	0.462314	1	0	0.0216378	1.73472e-18	isochorismatase family protein
PSPPH_0639	215	200	167	161	0.242154	1	0	0.0216378	1.73472e-18	DnaJ-like protein DjlA
PSPPH_1190	384	359	426	420	0.512418	1	0	0.0216378	1.73472e-18	keto-hydroxyglutarate-aldolase/keto-deoxy-phosphogluconate aldolase
PSPPH_2651	127.5	132	89.5	110	0.205373	1	0	0.0216378	1.73472e-18	hypothetical protein PSPPH_2651
PSPPH_4965	8	10	8	6	0.609633	1	0	0.0216378	1.73472e-18	prophage PSPPH06, virion morphogenesis protein
PSPPH_4765	96	215	119.5	228	0.593409	1	0	0.0216378	1.73472e-18	RNA polymerase sigma factor
PSPPH_0081	126	105	150	138	0.274572	1	0	0.0216378	1.73472e-18	xanthine phosphoribosyltransferase
PSPPH_0052	110	107	144	128	0.286374	1	0	0.0216378	1.73472e-18	hypothetical protein PSPPH_0052
PSPPH_3545	17	24	28	27	0.290597	1	0	0.0216378	1.73472e-18	YciI-like protein
PSPPH_3006	343.5	263	330.5	281	0.925803	1	0	0.0216378	1.73472e-18	iron compound ABC transporter periplasmic iron compound-binding protein
PSPPH_0946	1420	830	1053	647	0.168213	1	0	0.0216378	1.73472e-18	inner membrane protein
PSPPH_2134	172	273	172	253	0.834821	1	0	0.0216378	1.73472e-18	hypothetical protein PSPPH_2134
PSPPH_4865	106.5	85	102	97	0.843192	1	0	0.0216378	1.73472e-18	histidine ammonia-lyase
PSPPH_1179	391	336	417	343	0.824228	1	0	0.0216378	1.73472e-18	DNA-binding response regulator GltR
PSPPH_0240	388	394	413.5	366	0.933127	1	0	0.0216378	1.73472e-18	hypothetical protein PSPPH_0240
PSPPH_4070	418	286	421.5	298	0.908516	1	0	0.0216378	1.73472e-18	hypothetical protein PSPPH_4070
PSPPH_0071	485	391	474	418	0.918617	1	0	0.0216378	1.73472e-18	argininosuccinate lyase
PSPPH_0702	51	55	47	50	0.709202	1	0	0.0216378	1.73472e-18	phosphonate ABC transporter permease phnE
PSPPH_4586	17872	18987	15486	17179	0.59353	1	0	0.0216378	1.73472e-18	30S ribosomal protein S3
PSPPH_3251	259	209	242	106	0.14417	1	0	0.0216378	1.73472e-18	maleylacetoacetate isomerase
PSPPH_4839	36	27	38	18	0.695544	1	0	0.0216378	1.73472e-18	hypothetical protein PSPPH_4839
PSPPH_3348	79	75	63	66	0.418788	1	0	0.0216378	1.73472e-18	hypothetical protein PSPPH_3348
PSPPH_0332	43	39	49	33	0.870841	1	0	0.0216378	1.73472e-18	D-methionine ABC transporter permease
PSPPH_1494	42	54	44.5	44	0.741217	1	0	0.0216378	1.73472e-18	hypothetical protein PSPPH_1494
PSPPH_0520	541	520	574	526	0.855629	1	0	0.0216378	1.73472e-18	group 1 glycosyl transferase family protein
PSPPH_2818	212	156	148	140	0.219224	1	0	0.0216378	1.73472e-18	acetyltransferase
PSPPH_4472	33	31	40	31	0.720458	1	0	0.0216378	1.73472e-18	branched-chain amino acid ABC transporter ATP-binding protein
PSPPH_4370	389	259	369	280	0.917995	1	0	0.0216378	1.73472e-18	esterase
PSPPH_1366	49	88	42	90	0.863167	1	0	0.0216378	1.73472e-18	hypothetical protein PSPPH_1366
PSPPH_4524	401	205	330	212	0.572682	1	0	0.0216378	1.73472e-18	TonB-dependent receptor
PSPPH_3039	127	186	126	187	0.909986	1	0	0.0216378	1.73472e-18	transporter
PSPPH_4910	32	27	33	37	0.563728	1	0	0.0216378	1.73472e-18	taurine ABC transporter permease
PSPPH_A0017	107	79	100	85	0.89546	1	0	0.0216378	1.73472e-18	hypothetical protein PSPPH_A0017
PSPPH_3753	189.5	144	208	177	0.478715	1	0	0.0216378	1.73472e-18	siderophore biosynthesis protein
PSPPH_2128	162.5	129	163	133	0.90387	1	0	0.0216378	1.73472e-18	ribose operon repressor
PSPPH_0540	137	127	136	108	0.707823	1	0	0.0216378	1.73472e-18	hypothetical protein PSPPH_0540
PSPPH_3911	269.5	191	212	158	0.270767	1	0	0.0216378	1.73472e-18	transcriptional regulator MetR
PSPPH_2964	253	231	239	175	0.447136	1	0	0.0216378	1.73472e-18	sarcosine oxidase subunit alpha family protein
PSPPH_3535	101	82	108	95	0.638085	1	0	0.0216378	1.73472e-18	peptidyl-tRNA hydrolase domain-containing protein
PSPPH_1164	8	5	4	4	0.437147	1	0	0.0216378	1.73472e-18	hypothetical protein PSPPH_1164
PSPPH_2890	61.5	71	86	51	0.80938	1	0	0.0216378	1.73472e-18	transporter
PSPPH_2187	266	208	244	197	0.729077	1	0	0.0216378	1.73472e-18	amidase family protein
PSPPH_3337	275	254	249	234	0.643904	1	0	0.0216378	1.73472e-18	cbb3-type cytochrome c oxidase subunit I
PSPPH_3884	1	2	2	2	0.732856	1	0	0.0216378	1.73472e-18	ISPsy19, transposase
PSPPH_2948	132	98	125	88	0.71988	1	0	0.0216378	1.73472e-18	DNA/RNA non-specific endonuclease
PSPPH_0305	152	152	145	130	0.635616	1	0	0.0216378	1.73472e-18	hypothetical protein PSPPH_0305
PSPPH_0723	366	270	333	271	0.796831	1	0	0.0216378	1.73472e-18	FKBP-type peptidyl-prolyl cis-trans isomerase
PSPPH_0229	210	237	227	214	0.908762	1	0	0.0216378	1.73472e-18	acetyl-CoA hydrolase/transferase family protein
PSPPH_4996	119	72	119	96	0.574997	1	0	0.0216378	1.73472e-18	hypothetical protein PSPPH_4996
PSPPH_2194	143.5	104	108	70	0.108575	1	0	0.0216378	1.73472e-18	Cro/CI family transcriptional regulator
PSPPH_3462	135	120	172	134	0.357911	1	0	0.0216378	1.73472e-18	amino acid transporter LysE
PSPPH_4912	47	48	60	58	0.331702	1	0	0.0216378	1.73472e-18	RNA methyltransferase
PSPPH_0832	107.5	88	117	108	0.503565	1	0	0.0216378	1.73472e-18	HAD superfamily hydrolase
PSPPH_0643	114	89	134	107	0.431423	1	0	0.0216378	1.73472e-18	polyamine ABC transporter ATP-binding protein
PSPPH_3619	85	84	81	70	0.619803	1	0	0.0216378	1.73472e-18	cupin domain-containing protein
PSPPH_4062	99	90	89	84	0.683727	1	0	0.0216378	1.73472e-18	chromosome replication initiation inhibitor protein
PSPPH_3035	124	112	115	114	0.864839	1	0	0.0216378	1.73472e-18	D-isomer specific 2-hydroxyacid dehydrogenase family protein
PSPPH_3271	221	191	209	183	0.811646	1	0	0.0216378	1.73472e-18	hypothetical protein PSPPH_3271
PSPPH_4217	224	158	207	154	0.785486	1	0	0.0216378	1.73472e-18	phage integrase family site specific recombinase
PSPPH_3215	499	353	486	337	0.865181	1	0	0.0216378	1.73472e-18	soluble lytic murein transglycosylase
PSPPH_2572	1112	1198	1101	1055	0.730768	1	0	0.0216378	1.73472e-18	succinate-semialdehyde dehydrogenase (NADP+)
PSPPH_1639	2126	1389	1908.5	1260	0.615865	1	0	0.0216378	1.73472e-18	glycerol-3-phosphate acyltransferase PlsX
PSPPH_2175	55.5	97	54	73	0.423657	1	0	0.0216378	1.73472e-18	hypothetical protein PSPPH_2175
PSPPH_4374	120	139	146	139	0.641323	1	0	0.0216378	1.73472e-18	hypothetical protein PSPPH_4374
PSPPH_4131	130	129	159.5	165	0.27223	1	0	0.0216378	1.73472e-18	hypothetical protein PSPPH_4131
PSPPH_0511	430	409	435	404	0.933073	1	0	0.0216378	1.73472e-18	lipopolysaccharide heptosyltransferase I
PSPPH_1850	60	60	86	75	0.174051	1	0	0.0216378	1.73472e-18	hypothetical protein PSPPH_1850
PSPPH_3900	168	153	182	174	0.61322	1	0	0.0216378	1.73472e-18	glycerol-3-phosphate regulon repressor
PSPPH_3530	570	660	472	477	0.193899	1	0	0.0216378	1.73472e-18	transcriptional regulator PhhR
PSPPH_2249	174	175	181	235	0.375578	1	0	0.0216378	1.73472e-18	acetyltransferase
PSPPH_4594	27672.5	25199.5	28473	26672	0.855058	1	0	0.0216378	1.73472e-18	elongation factor Tu
PSPPH_2824	610	458.5	579.5	425	0.757103	1	0	0.0216378	1.73472e-18	TerC family membrane protein
PSPPH_2311	190	146	169	144	0.729936	1	0	0.0216378	1.73472e-18	insecticidal toxin complex protein
PSPPH_3967	113	103	143	123	0.302887	1	0	0.0216378	1.73472e-18	uracil-DNA glycosylase
PSPPH_1478	378	346.5	441	345	0.665874	1	0	0.0216378	1.73472e-18	sigma factor sigB regulation protein rsbQ
PSPPH_2597	177.5	146	171	144	0.887886	1	0	0.0216378	1.73472e-18	transcriptional activator MltR
PSPPH_2446	144	108	122	107	0.659479	1	0	0.0216378	1.73472e-18	allophanate hydrolase subunit 1
PSPPH_2660	197	317	158	224	0.139855	1	0	0.0216378	1.73472e-18	amino acid ABC transporter periplasmic amino acid-binding protein
PSPPH_0555	220	154	208	110	0.425364	1	0	0.0216378	1.73472e-18	flagellar motor protein MotB
PSPPH_0503	74	56	83	69	0.523051	1	0	0.0216378	1.73472e-18	solute-binding family 3 protein
PSPPH_3109	310	439	333	362	0.71006	1	0	0.0216378	1.73472e-18	NADH dehydrogenase subunit A
PSPPH_4566	8607	8072	8717	7438	0.88259	1	0	0.0216378	1.73472e-18	50S ribosomal protein L17
PSPPH_4151	426	362	491	394	0.554374	1	0	0.0216378	1.73472e-18	RNA polymerase factor sigma-54
PSPPH_5037	89	82	74	62	0.301253	1	0	0.0216378	1.73472e-18	acetylornithine deacetylase
PSPPH_1376	41	37	58	52	0.151253	1	0	0.0216378	1.73472e-18	endonuclease III
PSPPH_0174	162	98	143	120	0.879932	1	0	0.0216378	1.73472e-18	hypothetical protein PSPPH_0174
PSPPH_3181	825	879	763	702	0.451321	1	0	0.0216378	1.73472e-18	methyl-accepting chemotaxis protein
PSPPH_0164	1053	1029	1208	1056	0.678444	1	0	0.0216378	1.73472e-18	SciM protein
PSPPH_2242	85	57	75	53	0.65429	1	0	0.0216378	1.73472e-18	Uvs103
PSPPH_3812	302	256	312.5	241	0.912782	1	0	0.0216378	1.73472e-18	stationary phase survival protein SurE
PSPPH_5181	32	22	27	21	0.687039	1	0	0.0216378	1.73472e-18	HemK family modification methylase
PSPPH_1326	374.5	338	395	357	0.799587	1	0	0.0216378	1.73472e-18	carbon-nitrogen family hydrolase
PSPPH_4161	17	114	17	138	0.454314	1	0	0.0216378	1.73472e-18	fagA protein
PSPPH_2704	63	53	47	48	0.401437	1	0	0.0216378	1.73472e-18	ornithine decarboxylase
PSPPH_4141	355	399	363	418	0.869227	1	0	0.0216378	1.73472e-18	STAS domain-containing protein
PSPPH_0864	25	32	28	30	0.83868	1	0	0.0216378	1.73472e-18	Rieske 2Fe-2S family protein
PSPPH_3807	314	329	368	318	0.750881	1	0	0.0216378	1.73472e-18	DNA mismatch repair protein MutS
PSPPH_4428	411	398	485	363	0.814042	1	0	0.0216378	1.73472e-18	lipoprotein
PSPPH_4009	76	91	110	121	0.124156	1	0	0.0216378	1.73472e-18	hypothetical protein PSPPH_4009
PSPPH_1679	989	925	1066.5	881	0.927747	1	0	0.0216378	1.73472e-18	cysteinyl-tRNA synthetase
PSPPH_4194	1716	2097.5	1539	1833	0.553777	1	0	0.0216378	1.73472e-18	preprotein translocase subunit SecG
PSPPH_4848	30	18	29	16	0.798994	1	0	0.0216378	1.73472e-18	hypothetical protein PSPPH_4848
PSPPH_3314	85	89	72	81	0.565728	1	0	0.0216378	1.73472e-18	cytochrome c biogenesis protein CcmA
PSPPH_2267	69	88	77	93	0.705105	1	0	0.0216378	1.73472e-18	lactoylglutathione lyase
PSPPH_3634	1377	1119	1329	1009	0.74562	1	0	0.0216378	1.73472e-18	DEAD-box ATP dependent DNA helicase
PSPPH_4601	22120.5	28153.5	18493	24681	0.507913	1	0	0.0216378	1.73472e-18	50S ribosomal protein L10
PSPPH_3872	56	65	72	69	0.509116	1	0	0.0216378	1.73472e-18	TetR family transcriptional regulator
PSPPH_1973	100	85	76	77	0.385822	1	0	0.0216378	1.73472e-18	hypothetical protein PSPPH_1973
PSPPH_1250	55	77	42	80	0.744012	1	0	0.0216378	1.73472e-18	hypothetical protein PSPPH_1250
PSPPH_1716	274.5	224	272	211	0.875038	1	0	0.0216378	1.73472e-18	acetyltransferase
PSPPH_1722	131	154	133	132	0.720084	1	0	0.0216378	1.73472e-18	transporter
PSPPH_3373	870	760.5	716	774	0.656241	1	0	0.0216378	1.73472e-18	flagellar motor switch protein FliM
PSPPH_4679	20	14	17	13	0.752595	1	0	0.0216378	1.73472e-18	hypothetical protein PSPPH_4679
PSPPH_1892	25	15	19	12	0.438394	1	0	0.0216378	1.73472e-18	prophage PSPPH02 late control gene D protein
PSPPH_3742	171	104	140	90	0.390964	1	0	0.0216378	1.73472e-18	hypothetical protein PSPPH_3742
PSPPH_2059	214	170	200	165	0.800589	1	0	0.0216378	1.73472e-18	AcnD-accessory protein PrpF
PSPPH_0727	93	69	97	85	0.573919	1	0	0.0216378	1.73472e-18	pre-pilin leader sequence
PSPPH_5132	340	239	296	206	0.475494	1	0	0.0216378	1.73472e-18	LysR family transcriptional regulator
PSPPH_3070	335	368	309.5	290	0.431073	1	0	0.0216378	1.73472e-18	aldehyde dehydrogenase family protein
PSPPH_2251	407	485	431	465	0.938482	1	0	0.0216378	1.73472e-18	6-phosphogluconate dehydrogenase-like protein
PSPPH_1748	39	22	32	21	0.654375	1	0	0.0216378	1.73472e-18	acetyltransferase
PSPPH_4100	1635.5	1619	2302.5	1859	0.235283	1	0	0.0216378	1.73472e-18	preprotein translocase subunit SecA
PSPPH_0109	59	44	49	45	0.687406	1	0	0.0216378	1.73472e-18	hypothetical protein PSPPH_0109
PSPPH_1407	403.5	373	404	392	0.895026	1	0	0.0216378	1.73472e-18	carboxylesterase
PSPPH_3849	697	658	656	571	0.626137	1	0	0.0216378	1.73472e-18	ThiF family protein
PSPPH_2903	7	6	11	12	0.16198	1	0	0.0216378	1.73472e-18	isochorismate-pyruvate lyase
PSPPH_4115	188	147	162	128	0.483276	1	0	0.0216378	1.73472e-18	cell division protein FtsL
PSPPH_4152	158	182	163	194	0.809687	1	0	0.0216378	1.73472e-18	ribosomal subunit interface protein
PSPPH_2082	508	744	563	786	0.717833	1	0	0.0216378	1.73472e-18	hypothetical protein PSPPH_2082
PSPPH_1822	125	107.5	116	88	0.547669	1	0	0.0216378	1.73472e-18	gufA protein
PSPPH_2742	29	40	33.5	24	0.480654	1	0	0.0216378	1.73472e-18	ABC transporter periplasmic oligopeptide-binding protein
PSPPH_0393	117	107	132	145	0.292629	1	0	0.0216378	1.73472e-18	type IV pilus biogenesis protein PilP
PSPPH_0813	341	313	344	238	0.561178	1	0	0.0216378	1.73472e-18	hypothetical protein PSPPH_0813
PSPPH_4012	108	122	103	92	0.420992	1	0	0.0216378	1.73472e-18	transcriptional regulator TtgR
PSPPH_5166	304	345	257.5	310	0.508313	1	0	0.0216378	1.73472e-18	SPFH domain-containing protein
PSPPH_4282	1411	1585	1474	1462	0.927422	1	0	0.0216378	1.73472e-18	FKBP-type peptidyl-prolyl cis-trans isomerase
PSPPH_2749	186	229	168	240	0.91396	1	0	0.0216378	1.73472e-18	outer membrane ferric siderophore receptor
PSPPH_0592	55	53	76	38	0.798767	1	0	0.0216378	1.73472e-18	high-affinity branched-chain amino acid ABC transporter permease BraE
PSPPH_4570	9222.5	8548	8195	7942	0.660575	1	0	0.0216378	1.73472e-18	30S ribosomal protein S13
PSPPH_0118	31	40.5	34	25	0.495511	1	0	0.0216378	1.73472e-18	hypothetical protein PSPPH_0118
PSPPH_B0003	168	130	216	145	0.341952	1	0	0.0216378	1.73472e-18	ultraviolet light resistance protein A
PSPPH_4324	210	295.5	177	253	0.433742	1	0	0.0216378	1.73472e-18	RtrR protein
PSPPH_1163	120	142	135.5	108	0.732414	1	0	0.0216378	1.73472e-18	glycine cleavage system protein H
PSPPH_2491	188	125	162	116	0.554487	1	0	0.0216378	1.73472e-18	LysR family transcriptional regulator
PSPPH_1107	222.5	226	187.5	209	0.536775	1	0	0.0216378	1.73472e-18	alginate biosynthesis protein AlgA
PSPPH_A0093	619	604	519	484	0.322687	1	0	0.0216378	1.73472e-18	phage integrase family site specific recombinase
PSPPH_0890	1569	1126	1557	1143	0.966043	1	0	0.0216378	1.73472e-18	carbonic anhydrase
PSPPH_0029	92	83	106	69	0.886308	1	0	0.0216378	1.73472e-18	glycine betaine family ABC transporter substrate-binding protein
PSPPH_0062	79	123	86	132	0.70794	1	0	0.0216378	1.73472e-18	hypothetical protein PSPPH_0062
PSPPH_3026	282	237	246	156	0.196186	1	0	0.0216378	1.73472e-18	glycerate kinase 2
PSPPH_2179	92	90	86	66	0.40778	1	0	0.0216378	1.73472e-18	general secretion pathway protein GspL
PSPPH_5118	978	784	898	662	0.544951	1	0	0.0216378	1.73472e-18	response regulator
PSPPH_1839	46	57	48	52	0.833686	1	0	0.0216378	1.73472e-18	cytochrome c2
PSPPH_B0017	1072	1250	951	861	0.224346	1	0	0.0216378	1.73472e-18	phage integrase family site specific recombinase
PSPPH_2683	254	162.5	185	121	0.12705	1	0	0.0216378	1.73472e-18	ribosomal protein S6 modification enzyme
PSPPH_2275	21.5	19	20	19	0.857107	1	0	0.0216378	1.73472e-18	amino acid ABC transporter ATP-binding protein
PSPPH_0161	4	4	2	1	0.191088	1	0	0.0216378	1.73472e-18	ISPsy18, transposase, truncated
PSPPH_2940	115	66	102	64	0.707268	1	0	0.0216378	1.73472e-18	phosphonate ABC transporter ATP-binding protein
PSPPH_2801	192	193	172	198	0.831434	1	0	0.0216378	1.73472e-18	hypothetical protein PSPPH_2801
PSPPH_0476	170	250	267	251	0.289821	1	0	0.0216378	1.73472e-18	hypothetical protein PSPPH_0476
PSPPH_0652	54	34	70	45	0.247875	1	0	0.0216378	1.73472e-18	hypothetical protein PSPPH_0652
PSPPH_4894	128	104	154	110	0.544944	1	0	0.0216378	1.73472e-18	putrescine ABC transporter periplasmic putrescine-binding protein
PSPPH_4776	28	29	33	22	0.830344	1	0	0.0216378	1.73472e-18	membrane protein
PSPPH_1936	25	113	30	94	0.639576	1	0	0.0216378	1.73472e-18	RND family efflux transporter MFP subunit
PSPPH_0262	300	289	304	239	0.690103	1	0	0.0216378	1.73472e-18	zinc ABC transporter periplasmic zinc-binding protein
PSPPH_3245	623	371	543	368	0.660609	1	0	0.0216378	1.73472e-18	fumarylacetoacetase
PSPPH_0195	126	154	152.5	148	0.743685	1	0	0.0216378	1.73472e-18	lipoprotein
PSPPH_2084	29	23.5	30	24	0.834774	1	0	0.0216378	1.73472e-18	phage integrase family site specific recombinase
PSPPH_0848	340	229	282	234	0.62961	1	0	0.0216378	1.73472e-18	1-phosphofructokinase
PSPPH_4496	27	30	25	21	0.478404	1	0	0.0216378	1.73472e-18	urease accessory protein UreE
PSPPH_4988	19	20	17	23	0.85721	1	0	0.0216378	1.73472e-18	ISPsy24, transposase orfB
PSPPH_1571	258	260.5	287	291	0.60106	1	0	0.0216378	1.73472e-18	recombination associated protein
PSPPH_1767	121	127	143	106	0.889699	1	0	0.0216378	1.73472e-18	allantoicase
PSPPH_1515	135	169	145	140	0.77223	1	0	0.0216378	1.73472e-18	hypothetical protein PSPPH_1515
PSPPH_1732	8	6	5	9	0.867806	1	0	0.0216378	1.73472e-18	hypothetical protein PSPPH_1732
PSPPH_3799	97	90	95	101	0.825007	1	0	0.0216378	1.73472e-18	diacylglycerol kinase
PSPPH_0034	116	115	97	121	0.805046	1	0	0.0216378	1.73472e-18	CigR
PSPPH_1871	119	121	111	137	0.857382	1	0	0.0216378	1.73472e-18	glutamate carboxypeptidase
PSPPH_5084	388	326	386	342	0.914996	1	0	0.0216378	1.73472e-18	hypothetical protein PSPPH_5084
PSPPH_0243	436	404	588	479	0.231293	1	0	0.0216378	1.73472e-18	glutamate--cysteine ligase
PSPPH_0154	49	34	60	41	0.41505	1	0	0.0216378	1.73472e-18	hypothetical protein PSPPH_0154
PSPPH_4643	203	223	203	179	0.59075	1	0	0.0216378	1.73472e-18	copper-translocating P-type ATPase
PSPPH_4069	263	251	250	189	0.448779	1	0	0.0216378	1.73472e-18	lipoprotein
PSPPH_1807	33	56	36	43	0.624194	1	0	0.0216378	1.73472e-18	hypothetical protein PSPPH_1807
PSPPH_0967	229	194	267	178	0.817958	1	0	0.0216378	1.73472e-18	glucose-1-phosphate thymidylyltransferase
PSPPH_1088	117	95	99	89	0.550068	1	0	0.0216378	1.73472e-18	lipoprotein
PSPPH_0156	46	35	51	32	0.841918	1	0	0.0216378	1.73472e-18	hypothetical protein PSPPH_0156
PSPPH_0352	47	46	46	45	0.820321	1	0	0.0216378	1.73472e-18	lipoprotein
PSPPH_4387	499	448.5	518	462	0.866761	1	0	0.0216378	1.73472e-18	(dimethylallyl)adenosine tRNA methylthiotransferase
PSPPH_1968	2176.5	1471	1741	1201	0.298324	1	0	0.0216378	1.73472e-18	ompA family protein
PSPPH_2117	622	682	653.5	543	0.669733	1	0	0.0216378	1.73472e-18	FecR protein superfamily protein
PSPPH_1924	431	1964	397	1535	0.289118	1	0	0.0216378	1.73472e-18	pyoverdine sidechain peptide synthetase II, D-Asp-L-Thr component
PSPPH_3831	1187	1234	1297	1354	0.656381	1	0	0.0216378	1.73472e-18	outer membrane protein OmpH
PSPPH_3398	247	251	249	233	0.8851	1	0	0.0216378	1.73472e-18	flagellar rod assembly protein/muramidase FlgJ
PSPPH_3146	20	16	15	10	0.282006	1	0	0.0216378	1.73472e-18	glycosyl transferase, group 2 family protein
PSPPH_3665	486	427	472	473	0.865659	1	0	0.0216378	1.73472e-18	chorismate mutase/prephenate dehydratase
PSPPH_3447	394	332	410	323	0.933991	1	0	0.0216378	1.73472e-18	bacteriophytochrome heme oxygenase BphO
PSPPH_0801	38	46	35	31	0.353246	1	0	0.0216378	1.73472e-18	chemoreceptor glutamine deamidase CheD
PSPPH_3748	329	405	354	418	0.81005	1	0	0.0216378	1.73472e-18	hypothetical protein PSPPH_3748
PSPPH_4618	416	203	500	146	0.823166	1	0	0.0216378	1.73472e-18	methylmalonate-semialdehyde dehydrogenase
PSPPH_2867	48	63	61	65	0.613461	1	0	0.0216378	1.73472e-18	hypothetical protein PSPPH_2867
PSPPH_1439	108	99	111	98	0.885972	1	0	0.0216378	1.73472e-18	carboxylate/amino acid/amine transporter
PSPPH_0314	172	173	154.5	147	0.511366	1	0	0.0216378	1.73472e-18	lipoprotein
PSPPH_0127	37	28	41	42	0.320092	1	0	0.0216378	1.73472e-18	hypothetical protein PSPPH_0127
PSPPH_3170	71	63.5	66.5	58	0.721622	1	0	0.0216378	1.73472e-18	DNA-binding protein
PSPPH_3230	135.5	137	133	118	0.722253	1	0	0.0216378	1.73472e-18	hypothetical protein PSPPH_3230
PSPPH_2771	52	48	47	44	0.695331	1	0	0.0216378	1.73472e-18	glutamate-1-semialdehyde 2,1-aminomutase
PSPPH_0797	25	10	11	17	0.587531	1	0	0.0216378	1.73472e-18	hypothetical protein PSPPH_0797
PSPPH_1988	235	250	376	318	0.0736221	1	0	0.0216378	1.73472e-18	dienelactone hydrolase family protein
PSPPH_2344	149	161	138	132	0.490516	1	0	0.0216378	1.73472e-18	lipoprotein
PSPPH_4925	549	513	524	471	0.750377	1	0	0.0216378	1.73472e-18	imidazole glycerol phosphate synthase subunit HisH
PSPPH_0249	150	506	229	607	0.231799	1	0	0.0216378	1.73472e-18	hypothetical protein PSPPH_0249
PSPPH_2299	58	42	50	43	0.737814	1	0	0.0216378	1.73472e-18	glyoxalase family protein superfamily
PSPPH_B0054	213	202	220	177	0.829162	1	0	0.0216378	1.73472e-18	putative TnpA repressor protein
PSPPH_0184	85	109	119	107	0.460645	1	0	0.0216378	1.73472e-18	hypothetical protein PSPPH_0184
PSPPH_4547	648	459	542	391	0.395422	1	0	0.0216378	1.73472e-18	cupin domain-containing protein
PSPPH_A0063	214	142	209	138	0.877569	1	0	0.0216378	1.73472e-18	fimbrial chaperone protein, periplasmic
PSPPH_B0055	183	247	180	205	0.589355	1	0	0.0216378	1.73472e-18	addiction module antitoxin
PSPPH_0563	668	670	703	635	0.949956	1	0	0.0216378	1.73472e-18	DNA mismatch repair protein
PSPPH_4046	5	2	5	3	0.824193	1	0	0.0216378	1.73472e-18	ISPsy18, transposase
PSPPH_1718	41	58	38	40	0.314012	1	0	0.0216378	1.73472e-18	FMN reductase, NADPH-dependent
PSPPH_0608	107	87	109	92	0.843711	1	0	0.0216378	1.73472e-18	pancortin-3
PSPPH_0759	55	38	54	50	0.631305	1	0	0.0216378	1.73472e-18	type IV pilus protein PilM
PSPPH_3394	789	609	843	594	0.890245	1	0	0.0216378	1.73472e-18	glycosyl transferase, group 2 family protein
PSPPH_2460	60	63	57	56	0.723555	1	0	0.0216378	1.73472e-18	hypothetical protein PSPPH_2460
PSPPH_0977	115	89	98	87	0.641751	1	0	0.0216378	1.73472e-18	glycosyl transferase, group 2 family protein
PSPPH_1644	1250.5	814	988	736	0.372578	1	0	0.0216378	1.73472e-18	4-amino-4-deoxychorismate lyase
PSPPH_4579	9442	13561.5	8607.5	11998	0.620284	1	0	0.0216378	1.73472e-18	30S ribosomal protein S14
PSPPH_2112	282	282	294	309	0.752308	1	0	0.0216378	1.73472e-18	molybdopterin biosynthesis protein MoeA
PSPPH_3857	124	127	114	127	0.854518	1	0	0.0216378	1.73472e-18	hypothetical protein PSPPH_3857
PSPPH_0373	108	130	135	125	0.681395	1	0	0.0216378	1.73472e-18	hypothetical protein PSPPH_0373
PSPPH_2260	995	950	1034	1053	0.729722	1	0	0.0216378	1.73472e-18	UTP-glucose-1-phosphate uridylyltransferase
PSPPH_2709	26	28	30.5	17	0.703279	1	0	0.0216378	1.73472e-18	fatty acid desaturase
PSPPH_2856	136	89	115	72	0.382423	1	0	0.0216378	1.73472e-18	methyl-accepting chemotaxis protein
PSPPH_5063	208	149.5	167	142	0.475469	1	0	0.0216378	1.73472e-18	hypothetical protein PSPPH_5063
PSPPH_4132	909	919.5	1194	1113	0.253205	1	0	0.0216378	1.73472e-18	bifunctional sulfate adenylyltransferase subunit 1/adenylylsulfate kinase protein
PSPPH_4863	62	39	49	41	0.627862	1	0	0.0216378	1.73472e-18	histidine ABC transporter ATP-binding protein
PSPPH_4859	277	251	252	229	0.640928	1	0	0.0216378	1.73472e-18	BCCT family transporter
PSPPH_3737	272	225	217	175	0.245303	1	0	0.0216378	1.73472e-18	DNA-binding response regulator RstA
PSPPH_4633	45	36	44	31	0.737398	1	0	0.0216378	1.73472e-18	iron-dicitrate transporter ATP-binding subunit
PSPPH_1113	73	57	63	70	0.857027	1	0	0.0216378	1.73472e-18	alginate biosynthesis protein AlgG
PSPPH_1083	86	89	78	94	0.868552	1	0	0.0216378	1.73472e-18	UDP-N-acetylglucosamine 2-epimerase
PSPPH_3767	2041	1883	2158	1957	0.819703	1	0	0.0216378	1.73472e-18	translocation protein TolB
PSPPH_3263	61	60	43	57	0.381999	1	0	0.0216378	1.73472e-18	acetyltransferase
PSPPH_A0035	220	313	233	343	0.697794	1	0	0.0216378	1.73472e-18	hypothetical protein PSPPH_A0035
PSPPH_0135	190	430	175	388	0.634698	1	0	0.0216378	1.73472e-18	hypothetical protein PSPPH_0135
PSPPH_1742	54	51	46	46	0.601707	1	0	0.0216378	1.73472e-18	hypothetical protein PSPPH_1742
PSPPH_3327	33.5	31	26	32	0.736813	1	0	0.0216378	1.73472e-18	CAAX amino terminal protease family protein
PSPPH_2191	56	45	55	46	0.857553	1	0	0.0216378	1.73472e-18	sodium:solute symporter family protein
PSPPH_0283	32	44	35.5	33	0.665843	1	0	0.0216378	1.73472e-18	amino acid ABC transporter permease
PSPPH_2161	340	202	238	183	0.212142	1	0	0.0216378	1.73472e-18	flavin reductase domain-containing protein
PSPPH_2032	171	176	182	191	0.726094	1	0	0.0216378	1.73472e-18	Slt family transglycosylase
PSPPH_0535	984	804	885.5	748	0.658214	1	0	0.0216378	1.73472e-18	thiamine biosynthesis protein ThiC
PSPPH_2565	166	186.5	160	152	0.564706	1	0	0.0216378	1.73472e-18	aldehyde dehydrogenase family protein
PSPPH_4736	228	198	226	200	0.914253	1	0	0.0216378	1.73472e-18	type III effector HopAS1
PSPPH_1340	296.5	301	300	301	0.916754	1	0	0.0216378	1.73472e-18	transglycosylase
PSPPH_1857	160	134	165	166	0.549286	1	0	0.0216378	1.73472e-18	glycerophosphoryl diester phosphodiesterase
PSPPH_4034	17	25	27	14	0.801618	1	0	0.0216378	1.73472e-18	haloacid dehalogenase, type II, truncated
PSPPH_2608	252	255	238	251	0.870483	1	0	0.0216378	1.73472e-18	enoyl-CoA hydratase
PSPPH_2330	220	247	227	212	0.760509	1	0	0.0216378	1.73472e-18	CDP-diacylglycerol--glycerol-3-phosphate 3-phosphatidyltransferase
PSPPH_4716	83	125	84	130	0.892279	1	0	0.0216378	1.73472e-18	hypothetical protein PSPPH_4716
PSPPH_4238	203	179	224	198	0.624956	1	0	0.0216378	1.73472e-18	LuxR family transcriptional regulator
PSPPH_3208	78	54	78	69	0.646482	1	0	0.0216378	1.73472e-18	hypothetical protein PSPPH_3208
PSPPH_2588	80.5	66	67	61	0.544271	1	0	0.0216378	1.73472e-18	mutT/nudix family protein
PSPPH_2341	106	71	83	71	0.525756	1	0	0.0216378	1.73472e-18	pyridine nucleotide-disulfide oxidoreductase domain-containing protein
PSPPH_1153	958	925	1157.5	894	0.673703	1	0	0.0216378	1.73472e-18	valyl-tRNA synthetase
PSPPH_0452	29	28	31	23	0.776997	1	0	0.0216378	1.73472e-18	4-hydroxybenzoyl-CoA thioesterase domain-containing protein
PSPPH_3709	380	413	366	358	0.647966	1	0	0.0216378	1.73472e-18	hypothetical protein PSPPH_3709
PSPPH_2642	307	281	273	287	0.808682	1	0	0.0216378	1.73472e-18	multidrug RND efflux transporter, permease MdtC
PSPPH_2258	110.5	134	107	122	0.760469	1	0	0.0216378	1.73472e-18	lipoprotein
PSPPH_3962	168	189	189	134	0.6419	1	0	0.0216378	1.73472e-18	DNA-binding response regulator TctD
PSPPH_4555	942	716.5	771	583	0.313915	1	0	0.0216378	1.73472e-18	hypothetical protein PSPPH_4555
PSPPH_4760	79	118	79	108	0.840818	1	0	0.0216378	1.73472e-18	hypothetical protein PSPPH_4760
PSPPH_0818	137	110	153	124	0.592678	1	0	0.0216378	1.73472e-18	type IV pilus prepilin peptidase PilD
PSPPH_0291	301	261	284	281	0.927627	1	0	0.0216378	1.73472e-18	cation transport protein chaC
PSPPH_2498	131	129.5	112	107	0.405975	1	0	0.0216378	1.73472e-18	hypothetical protein PSPPH_2498
PSPPH_3912	144	118	146	89	0.603793	1	0	0.0216378	1.73472e-18	mutT/nudix family protein
PSPPH_1006	63	31	58	52	0.505853	1	0	0.0216378	1.73472e-18	hypothetical protein PSPPH_1006
PSPPH_0736	94	99	107	81	0.861917	1	0	0.0216378	1.73472e-18	type IV fimbriae expression regulatory protein pilR
PSPPH_3981	260	170	202.5	138	0.249386	1	0	0.0216378	1.73472e-18	3-hydroxyacyl-CoA-acyl carrier protein transferase
PSPPH_1989	2311	1680	2376.5	1689	0.929293	1	0	0.0216378	1.73472e-18	3-oxoacyl-(acyl carrier protein) synthase I
PSPPH_4864	65.5	62	62	46	0.465973	1	0	0.0216378	1.73472e-18	histidine ammonia-lyase
PSPPH_4876	119	99	127.5	94	0.879422	1	0	0.0216378	1.73472e-18	HAD family hydrolase
PSPPH_2000	100	78	102	78	0.86885	1	0	0.0216378	1.73472e-18	hypothetical protein PSPPH_2000
PSPPH_4433	33	37.5	43	41	0.466909	1	0	0.0216378	1.73472e-18	CpaB family Flp pilus assembly protein
PSPPH_4875	736	700	788	695	0.873614	1	0	0.0216378	1.73472e-18	dinucleoside polyphosphate hydrolase
PSPPH_3286	52	48	59	72	0.236863	1	0	0.0216378	1.73472e-18	DNA-3-methyladenine glycosylase 1
PSPPH_0394	395	374	424.5	399	0.730604	1	0	0.0216378	1.73472e-18	type IV pilus biogenesis protein PilQ
PSPPH_1601	113	147	118	151	0.853687	1	0	0.0216378	1.73472e-18	hypothetical protein PSPPH_1601
PSPPH_3201	646	526	581	414	0.413155	1	0	0.0216378	1.73472e-18	beta-hexosaminidase
PSPPH_2967	345	325	273	228	0.149444	1	0	0.0216378	1.73472e-18	LysR family transcriptional regulator
PSPPH_0506	405	356	412	375	0.870356	1	0	0.0216378	1.73472e-18	ATP-dependent RNA helicase DbpA
PSPPH_3093	926	885	957	870	0.944425	1	0	0.0216378	1.73472e-18	cell division protein FtsK
PSPPH_3143	44	36	40	50	0.613571	1	0	0.0216378	1.73472e-18	low molecular weight protein-tyrosine-phosphatase
PSPPH_2012	94	69	53	52	0.0433369	1	0	0.0216378	1.73472e-18	chaperone protein PapD
PSPPH_0144	109	99	116	91	0.891411	1	0	0.0216378	1.73472e-18	3'(2'),5'-bisphosphate nucleotidase
PSPPH_2647	407	379	348	350	0.552534	1	0	0.0216378	1.73472e-18	trehalose synthase/ maltokinase
PSPPH_4759	262	225	230	209	0.617506	1	0	0.0216378	1.73472e-18	acyltransferase
PSPPH_0698	76	61	60	68	0.752589	1	0	0.0216378	1.73472e-18	PAAR motif-containing protein
PSPPH_1457	20	31	19	17	0.256108	1	0	0.0216378	1.73472e-18	hypothetical protein PSPPH_1457
PSPPH_4234	43	49	39	51	0.849874	1	0	0.0216378	1.73472e-18	peptide ABC transporter ATP-binding protein
PSPPH_2974	74	58	54	44	0.17461	1	0	0.0216378	1.73472e-18	D-isomer specific 2-hydroxyacid dehydrogenase family protein
PSPPH_3158	216	262	177	186	0.172546	1	0	0.0216378	1.73472e-18	short-chain fatty acid transporter
PSPPH_4958	1	3	1	0	0.381545	1	0	0.0216378	1.73472e-18	hypothetical protein PSPPH_4958
PSPPH_4541	28	18	28	11	0.613694	1	0	0.0216378	1.73472e-18	hypothetical protein PSPPH_4541
PSPPH_0559	122	127	119	106	0.629527	1	0	0.0216378	1.73472e-18	iron-sulfur cluster-binding protein
PSPPH_1039	108	108	178	123	0.103068	1	0	0.0216378	1.73472e-18	long-chain-fatty-acid--CoA ligase
PSPPH_5111	73	64	93	62	0.57536	1	0	0.0216378	1.73472e-18	rubredoxin
PSPPH_0994	54	55	65	70	0.329705	1	0	0.0216378	1.73472e-18	outer membrane lipoprotein LolB
PSPPH_0417	62	52	67	78	0.285252	1	0	0.0216378	1.73472e-18	hypothetical protein PSPPH_0417
PSPPH_2996	25	19	31.5	22	0.564846	1	0	0.0216378	1.73472e-18	PAP2 superfamily protein
PSPPH_1344	74	71	65	65	0.618322	1	0	0.0216378	1.73472e-18	mutT/nudix family protein
PSPPH_3438	65	73	45	49	0.0981324	1	0	0.0216378	1.73472e-18	short chain dehydrogenase/reductase family oxidoreductase
PSPPH_2338	94	83	92	82	0.868154	1	0	0.0216378	1.73472e-18	LacI family transcriptional regulator
PSPPH_4121	117	114	103	126	0.895064	1	0	0.0216378	1.73472e-18	phosphoheptose isomerase
PSPPH_3951	1752	1548	1781.5	1543	0.962942	1	0	0.0216378	1.73472e-18	GTP-binding protein LepA
PSPPH_5153	286	333	262	278	0.499443	1	0	0.0216378	1.73472e-18	hypothetical protein PSPPH_5153
PSPPH_5209	12495	12785	10971	10980	0.527568	1	0	0.0216378	1.73472e-18	F0F1 ATP synthase subunit alpha
PSPPH_4493	131	220	118	169	0.333288	1	0	0.0216378	1.73472e-18	bacterioferritin
PSPPH_4251	85	81	95	86	0.71233	1	0	0.0216378	1.73472e-18	major facilitator superfamily transporter phthalate permease
PSPPH_0907	189	127	176	126	0.805626	1	0	0.0216378	1.73472e-18	hypothetical protein PSPPH_0907
PSPPH_4418	48	53	47	44	0.680626	1	0	0.0216378	1.73472e-18	type IV leader peptidase family protein
PSPPH_3116	74	63	83	73	0.601766	1	0	0.0216378	1.73472e-18	NADH dehydrogenase subunit I
PSPPH_0956	286	234.5	336.5	305	0.285215	1	0	0.0216378	1.73472e-18	WbbD
PSPPH_3864	13	11	12	16	0.720825	1	0	0.0216378	1.73472e-18	hypothetical protein PSPPH_3864
PSPPH_4204	895	946	1095	1001	0.524485	1	0	0.0216378	1.73472e-18	dihydrodipicolinate reductase
PSPPH_3527	1035	894	979	792	0.676138	1	0	0.0216378	1.73472e-18	arginine/ornithine ABC transporter periplasmic arginine/ornithine-binding protein
PSPPH_0688	1847.5	1513	1638	1498	0.733427	1	0	0.0216378	1.73472e-18	tyrosyl-tRNA synthetase
PSPPH_3635	263	271	264	282	0.910745	1	0	0.0216378	1.73472e-18	hypothetical protein PSPPH_3635
PSPPH_3454	58	53	52	47	0.606593	1	0	0.0216378	1.73472e-18	sensor histidine kinase QseC
PSPPH_1683	42	37	39	30	0.616331	1	0	0.0216378	1.73472e-18	ABC transporter permease
PSPPH_2231	182	151.5	155	116	0.311032	1	0	0.0216378	1.73472e-18	nicotinamide mononucleotide transporter PnuC
PSPPH_2243	248	217	252	220	0.905561	1	0	0.0216378	1.73472e-18	glycogen debranching enzyme GlgX
PSPPH_1610	65.5	42	54	43	0.688751	1	0	0.0216378	1.73472e-18	hypothetical protein PSPPH_1610
PSPPH_5075	5	6	3	7	0.842349	1	0	0.0216378	1.73472e-18	hypothetical protein PSPPH_5075
PSPPH_2340	6	6	6	3	0.697377	1	0	0.0216378	1.73472e-18	Rieske 2Fe-2S family protein
PSPPH_2015	8	7	11	8	0.733923	1	0	0.0216378	1.73472e-18	LuxR family transcriptional regulator
PSPPH_2778	13	37	27	24	0.880155	1	0	0.0216378	1.73472e-18	hypothetical protein PSPPH_2778
PSPPH_3694	102	109	103	138	0.531619	1	0	0.0216378	1.73472e-18	alpha-ribazole-5''''-phosphate phosphatase
PSPPH_4397	8	10	10	6	0.872652	1	0	0.0216378	1.73472e-18	hypothetical protein PSPPH_4397
PSPPH_4255	208	199	252	215	0.502561	1	0	0.0216378	1.73472e-18	Fis family DNA-binding response regulator
PSPPH_1713	315.5	245	273	180	0.28533	1	0	0.0216378	1.73472e-18	hypothetical protein PSPPH_1713
PSPPH_1408	153	132	181	118	0.840703	1	0	0.0216378	1.73472e-18	OmpA family protein
PSPPH_0346	33	28	31	22	0.629318	1	0	0.0216378	1.73472e-18	hypothetical protein PSPPH_0346
PSPPH_1352	194	159	182	144	0.69941	1	0	0.0216378	1.73472e-18	cytochrome C assembly family protein
PSPPH_0900	494	363	469	305	0.61483	1	0	0.0216378	1.73472e-18	sugar efflux transporter
PSPPH_2682	274.5	204	225	155	0.245618	1	0	0.0216378	1.73472e-18	magnesium/cobalt transporter CorA family protein
PSPPH_3386	401.5	351	358	349	0.763461	1	0	0.0216378	1.73472e-18	flagellar sensor histidine kinase FleS
PSPPH_2928	83	76	68	54	0.222567	1	0	0.0216378	1.73472e-18	carbon-phosphorus lyase complex accessory protein
PSPPH_2902	66	44	52	41	0.497582	1	0	0.0216378	1.73472e-18	yersiniabactin synthetase, salycilate ligase component Irp5
PSPPH_3357	190	151	208	163	0.671306	1	0	0.0216378	1.73472e-18	flagellar motor protein MotD
PSPPH_3521	344	184	339	196	0.914332	1	0	0.0216378	1.73472e-18	bifunctional N-succinyldiaminopimelate-aminotransferase/acetylornithine transaminase protein
PSPPH_1487	35	37	30	20	0.160789	1	0	0.0216378	1.73472e-18	hypothetical protein PSPPH_1487
PSPPH_5205	509.5	418	502	430	0.94204	1	0	0.0216378	1.73472e-18	UDP-N-acetylglucosamine pyrophosphorylase
PSPPH_2784	50	41	38	23	0.104093	1	0	0.0216378	1.73472e-18	dipeptide transport system permease DppC
PSPPH_5122	184	146	187.5	151	0.877488	1	0	0.0216378	1.73472e-18	phosphate ABC transporter permease
PSPPH_2071	62	57	54	47	0.507471	1	0	0.0216378	1.73472e-18	nitrite reductase (NAD(P)H), truncated
PSPPH_3590	276	194.5	247	223	0.913651	1	0	0.0216378	1.73472e-18	hypothetical protein PSPPH_3590
PSPPH_3838	1968	2360	1902	2007	0.625825	1	0	0.0216378	1.73472e-18	uridylate kinase
PSPPH_2223	209	310	251	234	0.74399	1	0	0.0216378	1.73472e-18	hypothetical protein PSPPH_2223
PSPPH_5041	20	15	27	24	0.222738	1	0	0.0216378	1.73472e-18	hypothetical protein PSPPH_5041
PSPPH_3167	41	31	35	25	0.488146	1	0	0.0216378	1.73472e-18	alkanesulfonate monooxygenase family protein
PSPPH_4604	6945	8018	7155	7235	0.857131	1	0	0.0216378	1.73472e-18	transcription antitermination protein NusG
PSPPH_2029	59.5	50	50	39	0.398486	1	0	0.0216378	1.73472e-18	hypothetical protein PSPPH_2029
PSPPH_0798	25	17	16	21	0.714392	1	0	0.0216378	1.73472e-18	hypothetical protein PSPPH_0798
PSPPH_3372	485	563	373	594	0.689237	1	0	0.0216378	1.73472e-18	flagellar motor switch protein
PSPPH_3042	244	183	226	158	0.607654	1	0	0.0216378	1.73472e-18	3-hydroxyacyl-CoA-acyl carrier protein transferase
PSPPH_1139	81	55	65	51	0.483172	1	0	0.0216378	1.73472e-18	hypothetical protein PSPPH_1139
PSPPH_4707	152	104.5	131	106	0.694265	1	0	0.0216378	1.73472e-18	pyrroloquinoline quinone biosynthesis protein PqqD
PSPPH_2236	129	133	114	125	0.653231	1	0	0.0216378	1.73472e-18	LysR family transcriptional regulator
PSPPH_4384	158	187	181	182	0.809848	1	0	0.0216378	1.73472e-18	glutamate-1-semialdehyde aminotransferase
PSPPH_2595	111	162	110	145	0.759942	1	0	0.0216378	1.73472e-18	mannitol ABC transporter permease
PSPPH_4056	23	30	22	26	0.760562	1	0	0.0216378	1.73472e-18	ArsR family transcriptional regulator
PSPPH_3404	166	142	151	130	0.674694	1	0	0.0216378	1.73472e-18	flagellar basal-body protein
PSPPH_4030	181	156	170.5	142	0.713708	1	0	0.0216378	1.73472e-18	hypothetical protein PSPPH_4030
PSPPH_1664	605	592	562	537	0.670767	1	0	0.0216378	1.73472e-18	oxidoreductase
PSPPH_1875	20	12	23	21	0.333427	1	0	0.0216378	1.73472e-18	hypothetical protein PSPPH_1875
PSPPH_2078	167	203	211	228	0.390052	1	0	0.0216378	1.73472e-18	ribosome modulation factor-like protein
PSPPH_2516	4	10	9	12	0.41282	1	0	0.0216378	1.73472e-18	hypothetical protein PSPPH_2516
PSPPH_4559	16	11	14	12	0.900333	1	0	0.0216378	1.73472e-18	transposition helper protein, truncated
PSPPH_3544	51	57	44	57	0.790318	1	0	0.0216378	1.73472e-18	intracellular septation protein A
PSPPH_1091	188	178	171	175	0.815487	1	0	0.0216378	1.73472e-18	iron(III) dicitrate transport protein fecA
PSPPH_4447	845	807	695	705	0.412662	1	0	0.0216378	1.73472e-18	tRNA-dihydrouridine synthase B
PSPPH_4173	23	28	25	22	0.766402	1	0	0.0216378	1.73472e-18	aspartyl/glutamyl-tRNA amidotransferase subunit C
PSPPH_3189	115	89	113.5	98	0.87701	1	0	0.0216378	1.73472e-18	iolD protein
PSPPH_1582	1030	1315	985	1292	0.88934	1	0	0.0216378	1.73472e-18	FKBP-type peptidyl-prolyl cis-trans isomerase
PSPPH_0110	72	53	62	53	0.73641	1	0	0.0216378	1.73472e-18	short chain dehydrogenase/reductase family oxidoreductase
PSPPH_2176	60	53	56	44	0.62696	1	0	0.0216378	1.73472e-18	general secretion pathway protein GspI
PSPPH_1694	146	120	149	154	0.522056	1	0	0.0216378	1.73472e-18	hypothetical protein PSPPH_1694
PSPPH_2571	329	309.5	294	309	0.779464	1	0	0.0216378	1.73472e-18	insecticidal toxin complex protein
PSPPH_2121	154	91	128	105	0.81259	1	0	0.0216378	1.73472e-18	hypothetical protein PSPPH_2121
PSPPH_4103	2932.5	3170	3238	3344	0.723702	1	0	0.0216378	1.73472e-18	cell division protein FtsZ
PSPPH_3565	9	14	14	9	0.804169	1	0	0.0216378	1.73472e-18	hypothetical protein PSPPH_3565
PSPPH_2438	61	39	50	31	0.387351	1	0	0.0216378	1.73472e-18	translation initiation inhibitor
PSPPH_3874	385	412	410	382	0.929213	1	0	0.0216378	1.73472e-18	peptide chain release factor 2, programmed frameshift
PSPPH_0179	196	115	256	160	0.14771	1	0	0.0216378	1.73472e-18	ATPase AAA
PSPPH_2469	102	99	98	112	0.83359	1	0	0.0216378	1.73472e-18	LysR family transcriptional regulator
PSPPH_3901	2573	2724	3126	2704	0.647423	1	0	0.0216378	1.73472e-18	glycerol-3-phosphate dehydrogenase
PSPPH_1395	28	30	38	31	0.514088	1	0	0.0216378	1.73472e-18	hypothetical protein PSPPH_1395
PSPPH_0435	13	10	10	7	0.521169	1	0	0.0216378	1.73472e-18	malonate decarboxylase subunit delta
PSPPH_1317	666	554.5	707	617	0.685115	1	0	0.0216378	1.73472e-18	radical SAM protein
PSPPH_2521	68	57	56	43	0.325472	1	0	0.0216378	1.73472e-18	type III secretion component
PSPPH_1016	439	347	415	348	0.869534	1	0	0.0216378	1.73472e-18	ferrochelatase
PSPPH_2543	35	22	18	38	0.835833	1	0	0.0216378	1.73472e-18	response regulator
PSPPH_2065	250	139	233	139	0.81725	1	0	0.0216378	1.73472e-18	crfX protein
PSPPH_0442	245.5	175	217	166	0.639641	1	0	0.0216378	1.73472e-18	malonate utilization transcriptional regulator
PSPPH_4310	349	243	331	250	0.903819	1	0	0.0216378	1.73472e-18	fatty acid desaturase
PSPPH_2049	172.5	167	210	149	0.788332	1	0	0.0216378	1.73472e-18	phosphoadenosine phosphosulfate reductase
PSPPH_1020	43	36	53	36	0.613783	1	0	0.0216378	1.73472e-18	hypothetical protein PSPPH_1020
PSPPH_4908	30	30	25	32	0.837243	1	0	0.0216378	1.73472e-18	taurine ABC transporter periplasmic binding protein
PSPPH_2168	104	99	80	74	0.200957	1	0	0.0216378	1.73472e-18	hypothetical protein PSPPH_2168
PSPPH_0044	15	7	12	14	0.714957	1	0	0.0216378	1.73472e-18	lipoprotein
PSPPH_1271	117	92	106.5	95	0.849926	1	0	0.0216378	1.73472e-18	type III transcriptional regulator HrpS
PSPPH_3423	410	362	343.5	378	0.732369	1	0	0.0216378	1.73472e-18	3-oxoacyl-(acyl-carrier-protein) synthase III
PSPPH_3778	390	380	540.5	357	0.452085	1	0	0.0216378	1.73472e-18	Dps family protein
PSPPH_4976	100	77	71	74	0.357241	1	0	0.0216378	1.73472e-18	hypothetical protein PSPPH_4976
PSPPH_0447	248	313	340	318	0.427725	1	0	0.0216378	1.73472e-18	cytochrome b561 family protein
PSPPH_1608	189	200	205	184	0.91593	1	0	0.0216378	1.73472e-18	patatin family protein
PSPPH_2433	862	614	600	509	0.155394	1	0	0.0216378	1.73472e-18	p-hydroxycinnamoyl CoA hydratase/lyase
PSPPH_3587	87	85	89	84	0.890428	1	0	0.0216378	1.73472e-18	hypothetical protein PSPPH_3587
PSPPH_0851	121	87	118	80	0.815896	1	0	0.0216378	1.73472e-18	hypothetical protein PSPPH_0851
PSPPH_3700	149.5	142	144	107	0.4685	1	0	0.0216378	1.73472e-18	cobalamin biosynthesis protein
PSPPH_4294	407	394	391	347	0.681699	1	0	0.0216378	1.73472e-18	phage integrase family site specific recombinase
PSPPH_4040	369	333	274	258	0.170376	1	0	0.0216378	1.73472e-18	hypothetical protein PSPPH_4040
PSPPH_2714	29	20	22	30	0.821732	1	0	0.0216378	1.73472e-18	hypothetical protein PSPPH_2714
PSPPH_3495	126	100	111	105	0.843201	1	0	0.0216378	1.73472e-18	GGDEF domain/EAL domain-containing protein
PSPPH_B0022	1860	3249	1832.5	3086	0.85721	1	0	0.0216378	1.73472e-18	PbsX family transcriptional regulator
PSPPH_2838	22	22	22	19	0.79947	1	0	0.0216378	1.73472e-18	FAD-binding oxidoreductase
PSPPH_5036	49	50	52	46	0.853703	1	0	0.0216378	1.73472e-18	FAD-binding oxidoreductase
PSPPH_3716	570.5	529	610	507	0.926966	1	0	0.0216378	1.73472e-18	GTP pyrophosphokinase
PSPPH_4562	584.5	571	604	497	0.822362	1	0	0.0216378	1.73472e-18	major facilitator family transporter
PSPPH_3443	158	103	124	102	0.480587	1	0	0.0216378	1.73472e-18	hypothetical protein PSPPH_3443
PSPPH_1647	503	413	485	399	0.862371	1	0	0.0216378	1.73472e-18	DNA polymerase III subunit delta'
PSPPH_3935	16	62	9	49	0.244173	1	0	0.0216378	1.73472e-18	hypothetical protein PSPPH_3935
PSPPH_0473	132	119	139	123	0.83534	1	0	0.0216378	1.73472e-18	aspartate carbamoyltransferase catalytic subunit
PSPPH_2042	3473.5	5725	4187	6873	0.392512	1	0	0.0216378	1.73472e-18	outer membrane lipoprotein OprI
PSPPH_2020	27	24	16	19	0.171033	1	0	0.0216378	1.73472e-18	potassium-transporting ATPase subunit C
PSPPH_B0042	28	27	27	26	0.832624	1	0	0.0216378	1.73472e-18	killer protein, putative
PSPPH_3216	471	409.5	475	360	0.79343	1	0	0.0216378	1.73472e-18	MOSC domain-containing protein
PSPPH_0215	788.5	681	847	642	0.93345	1	0	0.0216378	1.73472e-18	aldehyde dehydrogenase family protein
PSPPH_2914	37	27	29	26	0.578955	1	0	0.0216378	1.73472e-18	FwdC/FmdC family protein
PSPPH_2662	48	46	50	44	0.856687	1	0	0.0216378	1.73472e-18	amino acid ABC transporter permease
PSPPH_2952	120	105	166	94	0.479491	1	0	0.0216378	1.73472e-18	senescence marker protein-30 family protein
PSPPH_3988	127	88	117	74	0.578606	1	0	0.0216378	1.73472e-18	hypothetical protein PSPPH_3988
PSPPH_0957	408	320	548	415	0.157893	1	0	0.0216378	1.73472e-18	mannosyltransferase
PSPPH_1578	161	112	116	97	0.227142	1	0	0.0216378	1.73472e-18	tartrate dehydrogenase
PSPPH_1779	983.5	803	872	785	0.710257	1	0	0.0216378	1.73472e-18	NAD-dependent DNA ligase LigA
PSPPH_3382	671	629	573	693	0.895296	1	0	0.0216378	1.73472e-18	flagellar motor switch protein G
PSPPH_1815	68	61	84	69	0.445402	1	0	0.0216378	1.73472e-18	acireductone dioxygenase family protein
PSPPH_2451	92	59	86	63	0.852929	1	0	0.0216378	1.73472e-18	outer membrane porin OprE
PSPPH_4947	17	13	18	16	0.720744	1	0	0.0216378	1.73472e-18	hypothetical protein PSPPH_4947
PSPPH_2207	92	69	70	61	0.334988	1	0	0.0216378	1.73472e-18	hypothetical protein PSPPH_2207
PSPPH_0483	1028	1405	1203	1286	0.911428	1	0	0.0216378	1.73472e-18	sensor histidine kinase/response regulator
PSPPH_0424	56	44	60	44	0.825099	1	0	0.0216378	1.73472e-18	glycosyl transferase, group 2 family protein
PSPPH_2397	17	16	18	16	0.838476	1	0	0.0216378	1.73472e-18	hypothetical protein PSPPH_2397
PSPPH_4742	86	69	60	58	0.221932	1	0	0.0216378	1.73472e-18	hypothetical protein PSPPH_4742
PSPPH_4213	498	438	428	362	0.395014	1	0	0.0216378	1.73472e-18	sodium-dependent transporter
PSPPH_3848	156	135	135	118	0.511382	1	0	0.0216378	1.73472e-18	sufE protein
PSPPH_3128	98	85	85	60	0.298438	1	0	0.0216378	1.73472e-18	peptidase propeptide/YPEB domain-containing protein
PSPPH_1562	184	162	188	151	0.87798	1	0	0.0216378	1.73472e-18	hypothetical protein PSPPH_1562
PSPPH_0528	1321	1233	1333	1098	0.804848	1	0	0.0216378	1.73472e-18	bifunctional heptose 7-phosphate kinase/heptose 1-phosphate adenyltransferase
PSPPH_4377	143	104	145	122	0.699502	1	0	0.0216378	1.73472e-18	AsnC family transcriptional regulator
PSPPH_3054	286	268	275	290	0.905502	1	0	0.0216378	1.73472e-18	general secretion pathway protein GspD
PSPPH_2413	54	42	63	31	0.852111	1	0	0.0216378	1.73472e-18	FAD-binding oxidoreductase
PSPPH_4655	124	147	123	105	0.408908	1	0	0.0216378	1.73472e-18	lipoprotein
PSPPH_2471	409	325	385	302	0.745131	1	0	0.0216378	1.73472e-18	inosine-uridine preferring nucleoside hydrolase
PSPPH_0806	52	37	36	29	0.202717	1	0	0.0216378	1.73472e-18	STAS domain-containing protein
PSPPH_2623	476	694	581	696	0.665824	1	0	0.0216378	1.73472e-18	yhgI protein
PSPPH_3048	51	63	60	62	0.781336	1	0	0.0216378	1.73472e-18	GntR family transcriptional regulator
PSPPH_2500	27	32	27	28	0.779603	1	0	0.0216378	1.73472e-18	hypothetical protein PSPPH_2500
PSPPH_3115	254	252	313	281	0.426795	1	0	0.0216378	1.73472e-18	NADH dehydrogenase subunit H
PSPPH_0677	261	351	298	359	0.717548	1	0	0.0216378	1.73472e-18	OsmC/Ohr family protein
PSPPH_4003	664	492	649.5	469	0.858361	1	0	0.0216378	1.73472e-18	sensory box histidine kinase/response regulator
PSPPH_4819	525	571	604	616	0.587809	1	0	0.0216378	1.73472e-18	phosphoglycerate kinase
PSPPH_0167	71	51	64	40	0.479933	1	0	0.0216378	1.73472e-18	phage integrase family site specific recombinase
PSPPH_0492	281	258	264	281	0.918589	1	0	0.0216378	1.73472e-18	potassium efflux protein KefA
PSPPH_4814	137	172	161.5	186	0.568388	1	0	0.0216378	1.73472e-18	hypothetical protein PSPPH_4814
PSPPH_0651	92	76	151	103	0.0461043	1	0	0.0216378	1.73472e-18	prophage PSPPH01 transcriptional regulator
PSPPH_1920	10	16	10.5	18	0.809709	1	0	0.0216378	1.73472e-18	hypothetical protein PSPPH_1920
PSPPH_0190	267	245	269	260	0.881928	1	0	0.0216378	1.73472e-18	oxidative stress regulatory protein OxyR
PSPPH_0467	162	158	248	198	0.101735	1	0	0.0216378	1.73472e-18	pyrroline-5-carboxylate reductase
PSPPH_1948	279	199	202	144	0.109833	1	0	0.0216378	1.73472e-18	tRNA-dihydrouridine synthase C
PSPPH_4672	388.5	490	557	610	0.158966	1	0	0.0216378	1.73472e-18	inorganic pyrophosphatase
PSPPH_1638	1199	1372	1006	1251	0.520856	1	0	0.0216378	1.73472e-18	50S ribosomal protein L32
PSPPH_4628	125	85	100	83	0.521278	1	0	0.0216378	1.73472e-18	hydroxydechloroatrazine ethylaminohydrolase
PSPPH_2376	87	64	64	45	0.141338	1	0	0.0216378	1.73472e-18	DNA-binding response regulator BaeS
PSPPH_3010	30	24	20	17	0.208006	1	0	0.0216378	1.73472e-18	acetyltransferase
PSPPH_4971	23	29	18	27	0.682813	1	0	0.0216378	1.73472e-18	hypothetical protein PSPPH_4971
PSPPH_1910	43	340	37	303	0.550176	1	0	0.0216378	1.73472e-18	pyoverdine synthetase, thioesterase component
PSPPH_3724	175	154	135	121	0.221738	1	0	0.0216378	1.73472e-18	flavoprotein WrbA
PSPPH_1127	249	191	234	159	0.575886	1	0	0.0216378	1.73472e-18	lipoprotein
PSPPH_1772	160	97	147	83	0.589866	1	0	0.0216378	1.73472e-18	guanine deaminase
PSPPH_0234	731.5	680	690	639	0.758743	1	0	0.0216378	1.73472e-18	glycine cleavage system aminomethyltransferase T
PSPPH_1437	11	12	13	6	0.59732	1	0	0.0216378	1.73472e-18	hypothetical protein PSPPH_1437
PSPPH_1569	205	179	201	144	0.606721	1	0	0.0216378	1.73472e-18	acyltransferase family protein
PSPPH_2934	43	43	35	37	0.470447	1	0	0.0216378	1.73472e-18	phosphonate metabolism protein PhnI
PSPPH_4747	70	105	68	82	0.466141	1	0	0.0216378	1.73472e-18	glycine betaine/L-proline ABC transporter periplasmic substrate-binding protein
PSPPH_3077	403	428	458	506	0.457868	1	0	0.0216378	1.73472e-18	hypothetical protein PSPPH_3077
PSPPH_4460	358.5	309	359	241	0.601772	1	0	0.0216378	1.73472e-18	precorrin-3B synthase
PSPPH_4845	1714	1386	2144	1491	0.43942	1	0	0.0216378	1.73472e-18	GTP-binding protein TypA
PSPPH_0410	46	47	50	48	0.78725	1	0	0.0216378	1.73472e-18	major facilitator superfamily protein
PSPPH_B0035	89	65	67	75	0.740916	1	0	0.0216378	1.73472e-18	conjugal transfer protein
PSPPH_0613	329	326	312	423	0.562422	1	0	0.0216378	1.73472e-18	hypothetical protein PSPPH_0613
PSPPH_4770	296	257	237	229	0.385724	1	0	0.0216378	1.73472e-18	hypothetical protein PSPPH_4770
PSPPH_4416	323	266	319	232	0.744572	1	0	0.0216378	1.73472e-18	sensory box histidine kinase
PSPPH_4982	49	39	42	28	0.343676	1	0	0.0216378	1.73472e-18	prophage PSPPH06 adenine modification methytransferase
PSPPH_0781	1902.5	1477	1759	1344	0.6781	1	0	0.0216378	1.73472e-18	hemagglutination activity domain-containing protein
PSPPH_0644	33	31	58	30	0.208463	1	0	0.0216378	1.73472e-18	polyamine ABC transporter periplasmic polyamine-binding protein
PSPPH_2188	46	45	53	41	0.849801	1	0	0.0216378	1.73472e-18	DeoR family transcriptional regulator
PSPPH_4429	32	29	40	32	0.581273	1	0	0.0216378	1.73472e-18	hypothetical protein PSPPH_4429
PSPPH_4895	697	432	735	455	0.784123	1	0	0.0216378	1.73472e-18	putrescine ABC transporter periplasmic putrescine-binding protein
PSPPH_4390	114	98	127	105	0.679861	1	0	0.0216378	1.73472e-18	metal ion transporter
PSPPH_4580	15134.5	17464.5	13258.5	15513	0.58116	1	0	0.0216378	1.73472e-18	50S ribosomal protein L5
PSPPH_2483	338	411	333	350	0.649628	1	0	0.0216378	1.73472e-18	histidine kinase
PSPPH_2885	195	120	143	95	0.179066	1	0	0.0216378	1.73472e-18	ABC transporter periplasmic substrate-binding protein
PSPPH_0198	1084	1740	1257	1476	0.874324	1	0	0.0216378	1.73472e-18	DNA-directed RNA polymerase subunit omega
PSPPH_0922	83	106	88	85	0.697044	1	0	0.0216378	1.73472e-18	hypothetical protein PSPPH_0922
PSPPH_4221	100	229	85	166	0.191088	1	0	0.0216378	1.73472e-18	hypothetical protein PSPPH_4221
PSPPH_4786	252	229	226	215	0.684753	1	0	0.0216378	1.73472e-18	hypothetical protein PSPPH_4786
PSPPH_3474	15	10.5	17	15	0.560141	1	0	0.0216378	1.73472e-18	hypothetical protein PSPPH_3474
PSPPH_0250	58	67	63	100	0.21681	1	0	0.0216378	1.73472e-18	hypothetical protein PSPPH_0250
PSPPH_1158	319	266	329	281	0.826299	1	0	0.0216378	1.73472e-18	hypothetical protein PSPPH_1158
PSPPH_3178	404	321	414	406	0.531744	1	0	0.0216378	1.73472e-18	hypothetical protein PSPPH_3178
PSPPH_1510	144	105	134	129	0.805742	1	0	0.0216378	1.73472e-18	polysaccharide lyase family protein
PSPPH_2158	1080	866	848	663	0.211075	1	0	0.0216378	1.73472e-18	4-hydroxy-2-oxovalerate aldolase domain-containing protein
PSPPH_3080	61	66	58	66	0.88126	1	0	0.0216378	1.73472e-18	ABC transporter periplasmic substrate-binding protein
PSPPH_5172	333	363	354	383	0.775506	1	0	0.0216378	1.73472e-18	sensor histidine kinase
PSPPH_1130	380	200.5	411	241	0.562614	1	0	0.0216378	1.73472e-18	amino acid ABC transporter periplasmic amino acid-binding protein
PSPPH_1072	191.5	208	215	173	0.875816	1	0	0.0216378	1.73472e-18	short chain dehydrogenase
PSPPH_0587	179	187	216	186	0.654606	1	0	0.0216378	1.73472e-18	NAD synthetase
PSPPH_3663	4262	4076	4539	4059	0.884683	1	0	0.0216378	1.73472e-18	cytidylate kinase
PSPPH_A0027	446	475	647.5	600	0.128405	1	0	0.0216378	1.73472e-18	levansucrase (Beta-D-fructofuranosyl transferase)(sucrose 6-fructosyl transferase)
PSPPH_2735	69	51	58	32	0.212314	1	0	0.0216378	1.73472e-18	hypothetical protein PSPPH_2735
PSPPH_2614	103	154	98	147	0.826713	1	0	0.0216378	1.73472e-18	SCP-2 sterol transfer family protein
PSPPH_3418	708	605	584	500	0.33871	1	0	0.0216378	1.73472e-18	major facilitator family transporter
PSPPH_4784	68	59	52	69	0.823607	1	0	0.0216378	1.73472e-18	methyltransferase
PSPPH_0753	118	112	116	122	0.863382	1	0	0.0216378	1.73472e-18	DNA repair ATPase
PSPPH_0206	676	713.5	826	704	0.641233	1	0	0.0216378	1.73472e-18	acetylglutamate kinase
PSPPH_4149	377	382	427	354	0.882743	1	0	0.0216378	1.73472e-18	OstA family protein
PSPPH_B0034	40	41	50	40	0.686869	1	0	0.0216378	1.73472e-18	conjugal transfer protein
PSPPH_5193	98	122	123	109	0.81713	1	0	0.0216378	1.73472e-18	LacI family transcription regulator
PSPPH_1096	65	50	42	34	0.0747915	1	0	0.0216378	1.73472e-18	hypothetical protein PSPPH_1096
PSPPH_2879	30	32	22	37	0.839762	1	0	0.0216378	1.73472e-18	short chain dehydrogenase/reductase family oxidoreductase
PSPPH_4130	156	143	169	162	0.604759	1	0	0.0216378	1.73472e-18	esterase/lipase/thioesterase family protein
PSPPH_0072	135	210	143	156	0.489956	1	0	0.0216378	1.73472e-18	hypothetical protein PSPPH_0072
PSPPH_4546	411	318	357	249	0.344034	1	0	0.0216378	1.73472e-18	hypothetical protein PSPPH_4546
PSPPH_1367	130	117	131	113	0.874911	1	0	0.0216378	1.73472e-18	hypothetical protein PSPPH_1367
PSPPH_B0011	441	354	344	267	0.187071	1	0	0.0216378	1.73472e-18	hypothetical protein PSPPH_B0011
PSPPH_4371	760	557	765.5	541	0.944928	1	0	0.0216378	1.73472e-18	D-galactose 1-dehydrogenase
PSPPH_3850	214	273	230	239	0.848935	1	0	0.0216378	1.73472e-18	succinyl-diaminopimelate desuccinylase
PSPPH_2135	3037	2641	2816	2377	0.668176	1	0	0.0216378	1.73472e-18	threonyl-tRNA synthetase
PSPPH_4911	59	57	63	67	0.62489	1	0	0.0216378	1.73472e-18	hypothetical protein PSPPH_4911
PSPPH_0347	35	27	40	26	0.79296	1	0	0.0216378	1.73472e-18	pH-dependent sodium/proton antiporter
PSPPH_3999	203	196	211	184	0.899513	1	0	0.0216378	1.73472e-18	hypothetical protein PSPPH_3999
PSPPH_2162	276	196	203	162	0.204699	1	0	0.0216378	1.73472e-18	hypothetical protein PSPPH_2162
PSPPH_1339	126	136	127	140	0.884702	1	0	0.0216378	1.73472e-18	cytidine/deoxycytidylate deaminase family protein
PSPPH_0815	5929.5	4362.5	5478.5	4138	0.753513	1	0	0.0216378	1.73472e-18	calcium binding hemolysin protein
PSPPH_2432	401.5	311	293	239	0.142179	1	0	0.0216378	1.73472e-18	MarR family transcriptional regulator
PSPPH_1969	744	564	616	512	0.462407	1	0	0.0216378	1.73472e-18	GntR family transcriptional regulator
PSPPH_0306	531	544	512	480	0.693244	1	0	0.0216378	1.73472e-18	Xaa-Pro aminopeptidase
PSPPH_5004	215	203	219	181	0.832357	1	0	0.0216378	1.73472e-18	HAD family hydrolase
PSPPH_4471	20	10	20	12	0.83062	1	0	0.0216378	1.73472e-18	branched-chain amino acid ABC transporter permease
PSPPH_2174	14	27	18	14	0.432629	1	0	0.0216378	1.73472e-18	general secretion pathway protein GspH
PSPPH_2310	974	916.5	843	750	0.397315	1	0	0.0216378	1.73472e-18	zinc-binding oxidoreductase
PSPPH_3885	33	42	31	29	0.42448	1	0	0.0216378	1.73472e-18	hypothetical protein PSPPH_3885
PSPPH_0945	105.5	69	85	49	0.219241	1	0	0.0216378	1.73472e-18	ISPsy22, transposase truncated
PSPPH_4589	17079	16435	15457	14278	0.595515	1	0	0.0216378	1.73472e-18	50S ribosomal protein L2
PSPPH_3910	1658	1297	1448	1086	0.452694	1	0	0.0216378	1.73472e-18	5-methyltetrahydropteroyltriglutamate-- homocysteine S-methyltransferase
PSPPH_3680	388	344.5	534	359	0.330505	1	0	0.0216378	1.73472e-18	hypothetical protein PSPPH_3680
PSPPH_4469	60	56	54	53	0.746836	1	0	0.0216378	1.73472e-18	branched-chain amino acid ABC transporter periplasmic amino acid-binding protein
PSPPH_4933	25	36	22	27	0.402253	1	0	0.0216378	1.73472e-18	ISPsy18, transposase
PSPPH_3094	65	60	47	58	0.459623	1	0	0.0216378	1.73472e-18	leucyl/phenylalanyl-tRNA--protein transferase
PSPPH_A0016	357	286.5	292	338	0.908585	1	0	0.0216378	1.73472e-18	hypothetical protein PSPPH_A0016
PSPPH_1804	130	105	121	85	0.545634	1	0	0.0216378	1.73472e-18	glutaredoxin
PSPPH_2661	51	47	56	53	0.689727	1	0	0.0216378	1.73472e-18	amino acid ABC transporter permease
PSPPH_4174	140	138	182.5	170	0.237379	1	0	0.0216378	1.73472e-18	aspartyl/glutamyl-tRNA amidotransferase subunit A
PSPPH_1536	264	211	259	206	0.893152	1	0	0.0216378	1.73472e-18	hypothetical protein PSPPH_1536
PSPPH_4825	38	43	37	37	0.705094	1	0	0.0216378	1.73472e-18	hypothetical protein PSPPH_4825
PSPPH_2259	58	110	62	100	0.850359	1	0	0.0216378	1.73472e-18	lipoprotein
PSPPH_4913	335	432	509	421	0.331329	1	0	0.0216378	1.73472e-18	preprotein translocase subunit SecB
PSPPH_3435	48	46	38	21	0.0667388	1	0	0.0216378	1.73472e-18	4-hydroxythreonine-4-phosphate dehydrogenase
PSPPH_5182	12	9	10	10	0.788691	1	0	0.0216378	1.73472e-18	metallothiol transferase FosB
PSPPH_1419	539	399	468	374	0.588151	1	0	0.0216378	1.73472e-18	GGDEF domain/EAL domain-containing protein
PSPPH_3611	137	132	148	125	0.880272	1	0	0.0216378	1.73472e-18	LysR family transcriptional regulator
PSPPH_3469	275	165	220.5	122	0.209834	1	0	0.0216378	1.73472e-18	glutathione-dependent formaldehyde dehydrogenase
PSPPH_1371	189	139	168.5	131	0.67382	1	0	0.0216378	1.73472e-18	sensory box histidine kinase/response regulator
PSPPH_4375	656	800.5	661.5	798	0.955963	1	0	0.0216378	1.73472e-18	cation efflux family protein
PSPPH_0512	409	401	584	461	0.199761	1	0	0.0216378	1.73472e-18	lipopolysaccharide core biosynthesis protein RfaG
PSPPH_1406	271	217	250	224	0.878743	1	0	0.0216378	1.73472e-18	ATP-dependent DNA helicase DinG
PSPPH_3461	637	535	738	704	0.30599	1	0	0.0216378	1.73472e-18	L-serine ammonia-lyase
PSPPH_2831	245.5	159	247	120	0.642123	1	0	0.0216378	1.73472e-18	methyl-accepting chemotaxis protein
PSPPH_1178	505	436	483	482	0.899219	1	0	0.0216378	1.73472e-18	glucokinase
PSPPH_4717	127	180	180	244	0.107643	1	0	0.0216378	1.73472e-18	dithiobiotin synthetase
PSPPH_0545	371	326	385.5	280	0.821419	1	0	0.0216378	1.73472e-18	hypothetical protein PSPPH_0545
PSPPH_2050	165	124	160	137	0.863968	1	0	0.0216378	1.73472e-18	phosphoserine phosphatase
PSPPH_1745	112	97	92	71	0.238841	1	0	0.0216378	1.73472e-18	methyl-accepting chemotaxis protein
PSPPH_1375	72	81	95	76	0.597358	1	0	0.0216378	1.73472e-18	hypothetical protein PSPPH_1375
PSPPH_1628	367	299	332	308	0.852663	1	0	0.0216378	1.73472e-18	tetraacyldisaccharide 4'-kinase
PSPPH_3968	4	8	5	4	0.665503	1	0	0.0216378	1.73472e-18	hypothetical protein PSPPH_3968
PSPPH_5024	257	362	342	368	0.491324	1	0	0.0216378	1.73472e-18	acetyltransferase
PSPPH_1475	94	134	94	132	0.896056	1	0	0.0216378	1.73472e-18	histidine transporter, periplasmic histidine-binding protein
PSPPH_0720	946	1052	999	995	0.962614	1	0	0.0216378	1.73472e-18	bifunctional riboflavin kinase/FMN adenylyltransferase
PSPPH_3034	61	43	61	58	0.577008	1	0	0.0216378	1.73472e-18	hypothetical protein PSPPH_3034
PSPPH_2129	101	91	119	86	0.762366	1	0	0.0216378	1.73472e-18	ribokinase
PSPPH_1544	232	331	322	334	0.448987	1	0	0.0216378	1.73472e-18	gas vesicle protein
PSPPH_0136	167	162	158	114	0.355014	1	0	0.0216378	1.73472e-18	hypothetical protein PSPPH_0136
PSPPH_4997	78	67	94	56	0.851657	1	0	0.0216378	1.73472e-18	hypothetical protein PSPPH_4997
PSPPH_5143	1878	1505	2064	1481	0.817971	1	0	0.0216378	1.73472e-18	pyruvate carboxylase subunit A
PSPPH_0019	288	262	311	296	0.634753	1	0	0.0216378	1.73472e-18	sun protein
PSPPH_4319	342	327	385	324	0.777159	1	0	0.0216378	1.73472e-18	phaseolotoxin-insensitive ornithine carbamoyltransferase
PSPPH_4766	461	468	492	424	0.926617	1	0	0.0216378	1.73472e-18	choline dehydrogenase
PSPPH_3082	35	47	35	46	0.873985	1	0	0.0216378	1.73472e-18	sulfur transfer complex subunit TusD
PSPPH_1177	633	562	696	582	0.743809	1	0	0.0216378	1.73472e-18	phosphogluconate dehydratase
PSPPH_4510	102	96	89	86	0.559765	1	0	0.0216378	1.73472e-18	ribosomal protein L11 methyltransferase
PSPPH_3975	163	135	136	103	0.287882	1	0	0.0216378	1.73472e-18	urea amidolyase-like protein
PSPPH_0574	1363.5	1216	1469.5	1206	0.863214	1	0	0.0216378	1.73472e-18	ribonuclease R
PSPPH_2898	142	101	97	81	0.137027	1	0	0.0216378	1.73472e-18	hypothetical protein PSPPH_2898
PSPPH_3503	32	46	26	55	0.869242	1	0	0.0216378	1.73472e-18	hypothetical protein PSPPH_3503
PSPPH_1789	187	306	229	347	0.425097	1	0	0.0216378	1.73472e-18	hypothetical protein PSPPH_1789
PSPPH_3564	42	51	58.5	47	0.58769	1	0	0.0216378	1.73472e-18	hypothetical protein PSPPH_3564
PSPPH_3575	1922	1817	1904	1645	0.800989	1	0	0.0216378	1.73472e-18	major facilitator family transporter
PSPPH_2415	23	14	15	19	0.840266	1	0	0.0216378	1.73472e-18	lysine N6-hydroxylase/L-ornithine N5-oxygenase family protein
PSPPH_2650	38	34	42	33	0.823562	1	0	0.0216378	1.73472e-18	major facilitator superfamily transporter
PSPPH_2580	129	110	119	101	0.694505	1	0	0.0216378	1.73472e-18	LysR family transcriptional regulator
PSPPH_0679	200	196	215	209	0.748256	1	0	0.0216378	1.73472e-18	ubiquinone biosynthesis protein
PSPPH_1691	347.5	242	306	208	0.496028	1	0	0.0216378	1.73472e-18	hypothetical protein PSPPH_1691
PSPPH_3107	76	63	65	62	0.70921	1	0	0.0216378	1.73472e-18	type II and III secretion system family protein
PSPPH_1201	251	172	213	140	0.360998	1	0	0.0216378	1.73472e-18	Outer membrane usher protein fimD
PSPPH_0069	177.5	256	196	237	0.917691	1	0	0.0216378	1.73472e-18	alginate biosynthesis regulatory protein AlgR
PSPPH_0649	514.5	506.5	548	505	0.876601	1	0	0.0216378	1.73472e-18	anthranilate synthase component I
PSPPH_2335	32	13	24	16	0.73289	1	0	0.0216378	1.73472e-18	AP endonuclease
PSPPH_4706	245	165	208	137	0.39981	1	0	0.0216378	1.73472e-18	pyrroloquinoline quinone biosynthesis protein PqqC
PSPPH_3238	591	577	636	548	0.935648	1	0	0.0216378	1.73472e-18	hypothetical protein PSPPH_3238
PSPPH_0248	240	696	308	838	0.309452	1	0	0.0216378	1.73472e-18	inhibitor of vertebrate lysozyme
PSPPH_4153	65.5	42	62	57	0.639876	1	0	0.0216378	1.73472e-18	PTS IIA-like nitrogen-regulatory protein PtsN
PSPPH_3914	2	2	5	0	1	1	0	0.0216378	1.73472e-18	hypothetical protein PSPPH_3914
PSPPH_0681	136	131	155	116	0.869082	1	0	0.0216378	1.73472e-18	short chain dehydrogenase/reductase family oxidoreductase
PSPPH_4820	159	150	173	161	0.710446	1	0	0.0216378	1.73472e-18	D-erythrose 4-phosphate dehydrogenase
PSPPH_2405	507	452	646	453	0.498109	1	0	0.0216378	1.73472e-18	molybdenum ABC transporter periplasmic molybdate-binding protein
PSPPH_5069	436	435	448.5	417	0.935018	1	0	0.0216378	1.73472e-18	Rhs family protein
PSPPH_2205	501	374	456	294	0.436139	1	0	0.0216378	1.73472e-18	glycosyl hydrolase family protein
PSPPH_2108	64	52	64	44	0.742004	1	0	0.0216378	1.73472e-18	RNA pseudouridine synthase family protein
PSPPH_1438	482	481	461	413	0.629711	1	0	0.0216378	1.73472e-18	poly(beta-D-mannuronate) C5 epimerase 3
PSPPH_1553	39	50	51	41	0.848584	1	0	0.0216378	1.73472e-18	hypothetical protein PSPPH_1553
PSPPH_1633	1227	1112	971	883	0.25421	1	0	0.0216378	1.73472e-18	ribosomal large subunit pseudouridine synthase C
PSPPH_5071	155	113	171	130	0.578296	1	0	0.0216378	1.73472e-18	hypothetical protein PSPPH_5071
PSPPH_4980	499	490	471	390	0.492612	1	0	0.0216378	1.73472e-18	hypothetical protein PSPPH_4980
PSPPH_2753	56	58	52	66	0.846827	1	0	0.0216378	1.73472e-18	YhcA
PSPPH_0876	109	95	102	82	0.633613	1	0	0.0216378	1.73472e-18	sulfite oxidase subunit YedY
PSPPH_4450	936	936	975	910	0.953214	1	0	0.0216378	1.73472e-18	phosphoribosylamine--glycine ligase
PSPPH_0920	156	143	124.5	126	0.403157	1	0	0.0216378	1.73472e-18	S-type pyocin family protein
PSPPH_2097	52	47	62	53	0.556447	1	0	0.0216378	1.73472e-18	protocatechuate 3,4-dioxygenase subunit alpha
PSPPH_0631	158	148	193	158	0.513013	1	0	0.0216378	1.73472e-18	diadenosine tetraphosphatase
PSPPH_2641	293.5	303	317	341	0.626319	1	0	0.0216378	1.73472e-18	multidrug RND efflux transporter, permease MdtB
PSPPH_0084	77	83	67	67	0.439063	1	0	0.0216378	1.73472e-18	pyridine nucleotide-disulfide oxidoreductase
PSPPH_1191	106	147.5	115	149	0.850015	1	0	0.0216378	1.73472e-18	hypothetical protein PSPPH_1191
PSPPH_3726	727	543.5	707	573	0.937435	1	0	0.0216378	1.73472e-18	C32 tRNA thiolase
PSPPH_5104	54	36	50	37	0.838057	1	0	0.0216378	1.73472e-18	hypothetical protein PSPPH_5104
PSPPH_4423	70	84	67	79	0.799971	1	0	0.0216378	1.73472e-18	translation initiation factor Sui1
PSPPH_B0049	59	61	53	37	0.217409	1	0	0.0216378	1.73472e-18	relaxosome component
PSPPH_3765	2127	1704	2025	1750	0.942711	1	0	0.0216378	1.73472e-18	hypothetical protein PSPPH_3765
PSPPH_2395	21	14	12	6	0.0582445	1	0	0.0216378	1.73472e-18	hypothetical protein PSPPH_2395
PSPPH_3381	452	449	413	457	0.872753	1	0	0.0216378	1.73472e-18	flagellar assembly protein H
PSPPH_4343	30	41	23	19	0.0530157	1	0	0.0216378	1.73472e-18	iron-sulfur cluster-binding protein
PSPPH_5220	1171.5	967	1276	1046	0.685562	1	0	0.0216378	1.73472e-18	inner membrane protein translocase component YidC
PSPPH_2115	148	244	189	212	0.891123	1	0	0.0216378	1.73472e-18	hypothetical protein PSPPH_2115
PSPPH_A0094	1119	1311	899	1057	0.283174	1	0	0.0216378	1.73472e-18	prevent-host-death family protein
PSPPH_3336	1368	3801	1648	5171	0.18815	1	0	0.0216378	1.73472e-18	esterase/lipase/thioesterase family protein
PSPPH_2381	181	143	159	131	0.589067	1	0	0.0216378	1.73472e-18	hypothetical protein PSPPH_2381
PSPPH_0623	332.5	283.5	310	232	0.524703	1	0	0.0216378	1.73472e-18	glycerol-3-phosphate acyltransferase PlsY
PSPPH_1211	1865	1591.5	2216	1587	0.639284	1	0	0.0216378	1.73472e-18	cytochrome o ubiquinol oxidase subunit I
PSPPH_4683	72	72	72	51	0.474766	1	0	0.0216378	1.73472e-18	O-antigen ABC transporter ATP-binding protein
PSPPH_2634	90	83	98	95	0.606947	1	0	0.0216378	1.73472e-18	exonuclease III
PSPPH_2935	22	20	20	20	0.858058	1	0	0.0216378	1.73472e-18	carbon-phosphorus lyase complex subunit
PSPPH_3671	174	131	181	129	0.894902	1	0	0.0216378	1.73472e-18	phosphoglycolate phosphatase
PSPPH_4114	1277	1112	1239	963	0.687392	1	0	0.0216378	1.73472e-18	peptidoglycan glycolsyltranferase FtsI
PSPPH_2953	58	62	64	54	0.877385	1	0	0.0216378	1.73472e-18	hypothetical protein PSPPH_2953
PSPPH_4025	1108	1485	1359	1502	0.630791	1	0	0.0216378	1.73472e-18	transcriptional regulator
PSPPH_0803	51	35	41	30	0.4656	1	0	0.0216378	1.73472e-18	chemotaxis protein CheW
PSPPH_3002	176	164	164	139	0.589552	1	0	0.0216378	1.73472e-18	dipeptide ABC transporter ATP-binding protein
PSPPH_4873	180.5	214	185	174	0.648101	1	0	0.0216378	1.73472e-18	prolipoprotein diacylglyceryl transferase
PSPPH_0849	620	545	536	455	0.416756	1	0	0.0216378	1.73472e-18	phosphotransferase system, fructose-specific IIBC component
PSPPH_2703	23	15	27	19	0.49346	1	0	0.0216378	1.73472e-18	quaternary ammonium compound-resistance protein
PSPPH_3190	64	57	52	47	0.38129	1	0	0.0216378	1.73472e-18	iolL protein
PSPPH_0808	108	81.5	120	84	0.700852	1	0	0.0216378	1.73472e-18	methyl-accepting chemotaxis protein
PSPPH_3012	14	24	12	14	0.289674	1	0	0.0216378	1.73472e-18	nitrite reductase
PSPPH_2853	4	3	4	4	0.812432	1	0	0.0216378	1.73472e-18	hypothetical protein PSPPH_2853
PSPPH_2943	474	426	428	318	0.342333	1	0	0.0216378	1.73472e-18	DNA topoisomerase III
PSPPH_0082	120	104	126	106	0.873804	1	0	0.0216378	1.73472e-18	sigma-54 dependent transcriptional regulator
PSPPH_3514	589	595.5	647	579	0.866785	1	0	0.0216378	1.73472e-18	riboflavin synthase subunit beta
PSPPH_0101	35	28	22	32	0.562495	1	0	0.0216378	1.73472e-18	ParB family protein
PSPPH_1788	351	317	353	280	0.788187	1	0	0.0216378	1.73472e-18	erythronate-4-phosphate dehydrogenase
PSPPH_1684	56	32	51	36	0.849813	1	0	0.0216378	1.73472e-18	ABC transporter permease
PSPPH_4435	61	49	80	80	0.0913805	1	0	0.0216378	1.73472e-18	hypothetical protein PSPPH_4435
PSPPH_0891	1446	748	1151	554	0.214646	1	0	0.0216378	1.73472e-18	methyl-accepting chemotaxis protein
PSPPH_5054	30	23	18	17	0.155804	1	0	0.0216378	1.73472e-18	AsnC family transcriptional regulator
PSPPH_1922	53	604.5	61	438	0.165938	1	0	0.0216378	1.73472e-18	pyoverdine biosynthesis regulatory protein
PSPPH_5117	531	591	466	517	0.512194	1	0	0.0216378	1.73472e-18	M24/M37 family peptidase
PSPPH_2239	67	77	62	65	0.602525	1	0	0.0216378	1.73472e-18	glycosyl transferase, group 2 family protein
PSPPH_3228	64	53	62	50	0.842018	1	0	0.0216378	1.73472e-18	group 1 glycosyl transferase family protein
PSPPH_3264	96	60	97	67	0.809323	1	0	0.0216378	1.73472e-18	bem46 protein
PSPPH_0415	106	120	112	117	0.889107	1	0	0.0216378	1.73472e-18	3-oxoacyl-(acyl carrier protein) synthase I
PSPPH_3393	1299	1058	1360	1264	0.600313	1	0	0.0216378	1.73472e-18	3-oxoacyl-(acyl-carrier-protein) synthase III
PSPPH_3411	75	53	63.5	50	0.600251	1	0	0.0216378	1.73472e-18	DNA-binding transcriptional regulator CynR
PSPPH_5138	108	95	114	88	0.88557	1	0	0.0216378	1.73472e-18	GntR family transcriptional regulator
PSPPH_4339	152	130	149	106	0.642859	1	0	0.0216378	1.73472e-18	cytochrome d ubiquinol oxidase subunit II
PSPPH_4989	1	1	0	1	1	1	0	0.0216378	1.73472e-18	ISPsy19, transposase truncated
PSPPH_4519	159	178	202	178	0.567925	1	0	0.0216378	1.73472e-18	NAD-dependent epimerase/dehydratase family protein
PSPPH_0975	208.5	189	197.5	153	0.54839	1	0	0.0216378	1.73472e-18	glycosyl transferase, group 2 family protein
PSPPH_3858	122	120.5	122	123	0.889578	1	0	0.0216378	1.73472e-18	hypothetical protein PSPPH_3858
PSPPH_3664	520.5	469	539	449	0.939469	1	0	0.0216378	1.73472e-18	prephenate dehydrogenase/3-phosphoshikimate 1-carboxyvinyltransferase family protein
PSPPH_3252	138	125	142	131	0.853837	1	0	0.0216378	1.73472e-18	glycolate oxidase subunit GlcD
PSPPH_1082	189	175	163	139	0.359468	1	0	0.0216378	1.73472e-18	hypothetical protein PSPPH_1082
PSPPH_3003	37	36	47	24	0.820001	1	0	0.0216378	1.73472e-18	oligogalacturonate-specific porin protein KdgM
PSPPH_4386	64	65	61.5	70	0.859806	1	0	0.0216378	1.73472e-18	hypothetical protein PSPPH_4386
PSPPH_3397	826	801	775.5	637	0.487996	1	0	0.0216378	1.73472e-18	flagellar hook-associated protein FlgK
PSPPH_3358	209	161	246	196	0.374942	1	0	0.0216378	1.73472e-18	flagellar motor protein
PSPPH_1792	157	192	159	141	0.467703	1	0	0.0216378	1.73472e-18	exonuclease
PSPPH_0351	156	205	139	199	0.751857	1	0	0.0216378	1.73472e-18	outer membrane lipoprotein Blc
PSPPH_3246	532	324	553	306	0.928528	1	0	0.0216378	1.73472e-18	homogentisate 1,2-dioxygenase
PSPPH_0800	58	48	47	43	0.518597	1	0	0.0216378	1.73472e-18	chemotaxis-specific methylesterase
PSPPH_0155	406	358	391.5	251	0.38447	1	0	0.0216378	1.73472e-18	OprD family outer membrane porin
PSPPH_2891	41	37	46	30	0.823388	1	0	0.0216378	1.73472e-18	Sco1/SenC family protein
PSPPH_0196	68	70	56	56	0.349584	1	0	0.0216378	1.73472e-18	endoribonuclease L-PSP
PSPPH_0604	372	398	367	297	0.461617	1	0	0.0216378	1.73472e-18	glutathione S-transferase YghU
PSPPH_1935	78	231	62	197	0.380435	1	0	0.0216378	1.73472e-18	macrolide efflux ABC transporter ATP-binding/permease
PSPPH_4015	661	455	694	493	0.75629	1	0	0.0216378	1.73472e-18	NodT family outer membrane efflux lipoprotein
PSPPH_0153	805	384	753	318	0.600452	1	0	0.0216378	1.73472e-18	agmatine deiminase
PSPPH_0263	40	39	38	31	0.623109	1	0	0.0216378	1.73472e-18	FUR family transcriptional regulator
PSPPH_2868	211	206	200	188	0.728161	1	0	0.0216378	1.73472e-18	major facilitator family transporter
PSPPH_0562	944	764	850	721	0.681156	1	0	0.0216378	1.73472e-18	N-acetylmuramoyl-L-alanine amidase
PSPPH_4671	84	83	81	87	0.88658	1	0	0.0216378	1.73472e-18	hypothetical protein PSPPH_4671
PSPPH_4402	310	407.5	406	448	0.384827	1	0	0.0216378	1.73472e-18	D-alanyl-D-alanine carboxypeptidase
PSPPH_0666	56	43	84	40	0.341921	1	0	0.0216378	1.73472e-18	hypothetical protein PSPPH_0666
PSPPH_1903	144	150	185	145	0.572615	1	0	0.0216378	1.73472e-18	universal stress protein family protein
PSPPH_B0051	85	99	64	80	0.271881	1	0	0.0216378	1.73472e-18	GntR family transcriptional regulator
PSPPH_2118	249	285	184	241	0.25268	1	0	0.0216378	1.73472e-18	malate/L-lactate family dehydrogenase
PSPPH_3581	4	5	10	12	0.0410005	1	0	0.0216378	1.73472e-18	ISPsy2, transposase
PSPPH_2193	144	121	137	100	0.599765	1	0	0.0216378	1.73472e-18	LysR family transcriptional regulator
PSPPH_5068	306	251	283	259	0.902553	1	0	0.0216378	1.73472e-18	hypothetical protein PSPPH_5068
PSPPH_2626	121	71	120	104	0.472943	1	0	0.0216378	1.73472e-18	gamma-carboxygeranoyl-CoA hydratase
PSPPH_4332	464	458	494	479	0.804914	1	0	0.0216378	1.73472e-18	DNA repair protein RadA
PSPPH_A0148	390	538	340	444	0.394327	1	0	0.0216378	1.73472e-18	ParA family protein
PSPPH_2009	36	51	46	43	0.874262	1	0	0.0216378	1.73472e-18	hypothetical protein PSPPH_2009
PSPPH_3343	150	177	155	168	0.912239	1	0	0.0216378	1.73472e-18	PilT domain-containing protein
PSPPH_2499	145.5	115	114	88	0.2158	1	0	0.0216378	1.73472e-18	radical SAM domain-containing protein
PSPPH_3448	282	220	244	184	0.443599	1	0	0.0216378	1.73472e-18	sulfatase family protein
PSPPH_3171	218	298	211	236	0.4736	1	0	0.0216378	1.73472e-18	hypothetical protein PSPPH_3171
PSPPH_3600	536	547	584	513	0.935525	1	0	0.0216378	1.73472e-18	inorganic polyphosphate/ATP-NAD kinase
PSPPH_2028	129	136	124	101	0.431326	1	0	0.0216378	1.73472e-18	acyl-CoA thioesterase II
PSPPH_1570	86	84	97	80	0.842862	1	0	0.0216378	1.73472e-18	bile acid transporter family protein
PSPPH_3830	1314	1151	1392	1254	0.72912	1	0	0.0216378	1.73472e-18	UDP-3-O-
PSPPH_5187	52	33	47	43	0.800514	1	0	0.0216378	1.73472e-18	sucrose porin
PSPPH_A0059	31	31	35	36	0.63276	1	0	0.0216378	1.73472e-18	hypothetical protein PSPPH_A0059
PSPPH_1953	238	118	140	161	0.410691	1	0	0.0216378	1.73472e-18	isopropylmalate isomerase small subunit
PSPPH_0313	436	280	558	335	0.272936	1	0	0.0216378	1.73472e-18	NLPA family lipoprotein
PSPPH_3472	183.5	144	160.5	125	0.510638	1	0	0.0216378	1.73472e-18	cytosine/purine/uracil/thiamine/allantoin permease family protein
PSPPH_5173	245	369	228.5	361	0.840226	1	0	0.0216378	1.73472e-18	ABC transporter ATP-binding protein
PSPPH_1112	72	76	71	91	0.694742	1	0	0.0216378	1.73472e-18	alginate biosynthesis protein AlgX
PSPPH_A0034	147	188	189	214	0.354737	1	0	0.0216378	1.73472e-18	PilT domain-containing protein
PSPPH_0911	26	21	29	18	0.869251	1	0	0.0216378	1.73472e-18	acetyltransferase
PSPPH_1874	166	146.5	159	130	0.697651	1	0	0.0216378	1.73472e-18	sensor histidine kinase
PSPPH_4924	177	120	150	134	0.81189	1	0	0.0216378	1.73472e-18	hypothetical protein PSPPH_4924
PSPPH_3038	55	51	60	40	0.772497	1	0	0.0216378	1.73472e-18	pyrazinamidase/nicotinamidase
PSPPH_0609	242	226	279	261	0.480177	1	0	0.0216378	1.73472e-18	hypothetical protein PSPPH_0609
PSPPH_0499	481	419	476	387	0.826924	1	0	0.0216378	1.73472e-18	response regulator/sensory box/GGDEF domain/EAL domain-containing protein
PSPPH_2533	5	1	3	2	1	1	0	0.0216378	1.73472e-18	hypothetical protein PSPPH_2533
PSPPH_1842	54	82	60	68	0.764365	1	0	0.0216378	1.73472e-18	hypothetical protein PSPPH_1842
PSPPH_2472	406	262	376	200	0.471608	1	0	0.0216378	1.73472e-18	GGDEF domain/EAL domain-containing protein
PSPPH_4534	31	12	30	17	0.746092	1	0	0.0216378	1.73472e-18	glycerophosphodiester phosphodiesterase
PSPPH_4850	49	39	50	31	0.763343	1	0	0.0216378	1.73472e-18	hypothetical protein PSPPH_4850
PSPPH_3533	16	14	12	9	0.334164	1	0	0.0216378	1.73472e-18	hypothetical protein PSPPH_3533
PSPPH_4118	153	182	191	176	0.659282	1	0	0.0216378	1.73472e-18	hypothetical protein PSPPH_4118
PSPPH_1593	30	32	36	27	0.848682	1	0	0.0216378	1.73472e-18	hypothetical protein PSPPH_1593
PSPPH_0519	792	741.5	869.5	735	0.818323	1	0	0.0216378	1.73472e-18	carbamoyltransferase family protein
PSPPH_5213	1732	1339.5	1671.5	1245	0.800445	1	0	0.0216378	1.73472e-18	F0F1 ATP synthase subunit A
PSPPH_3841	162	184	180	181	0.843815	1	0	0.0216378	1.73472e-18	methionine aminopeptidase
PSPPH_4775	64	83	63.5	63	0.543432	1	0	0.0216378	1.73472e-18	sulfur carrier protein ThiS
PSPPH_0033	598	719	764	759	0.467609	1	0	0.0216378	1.73472e-18	3-oxoadipate enol-lactonase
PSPPH_0554	296	252	320	232	0.920894	1	0	0.0216378	1.73472e-18	flagellar motor protein MotA
PSPPH_4656	139	109	124	87	0.453873	1	0	0.0216378	1.73472e-18	lipoprotein
PSPPH_1870	216	265	205	257	0.852183	1	0	0.0216378	1.73472e-18	outer membrane ferripyoverdine receptor
PSPPH_0242	286	287	323	324	0.554216	1	0	0.0216378	1.73472e-18	N-acetylglutamate synthase
PSPPH_3768	918.5	1033	911	1028	0.952984	1	0	0.0216378	1.73472e-18	tolA protein
PSPPH_4834	60	37	67	43	0.610379	1	0	0.0216378	1.73472e-18	Rhs family protein
PSPPH_1186	103	82	91	84	0.811895	1	0	0.0216378	1.73472e-18	aldose 1-epimerase family protein
PSPPH_3118	26	39	42	43	0.295485	1	0	0.0216378	1.73472e-18	NADH dehydrogenase subunit K
PSPPH_3291	53	49	52.5	35	0.519754	1	0	0.0216378	1.73472e-18	molybdopterin-binding oxidoreductase
PSPPH_0146	251	227	227	194	0.535704	1	0	0.0216378	1.73472e-18	sigma-54 dependent DNA-binding response regulator
PSPPH_4292	23	38	15	38	0.619038	1	0	0.0216378	1.73472e-18	transcription elongation factor GreB
PSPPH_3738	2067.5	2108	1807	1736	0.428102	1	0	0.0216378	1.73472e-18	ribonucleotide-diphosphate reductase subunit alpha
PSPPH_2808	46	24	38	44	0.568779	1	0	0.0216378	1.73472e-18	hypothetical protein PSPPH_2808
PSPPH_4634	43	42	38	33	0.488045	1	0	0.0216378	1.73472e-18	bmp family protein
PSPPH_1124	71	62	82	62	0.749992	1	0	0.0216378	1.73472e-18	molybdopterin converting factor subunit 2
PSPPH_0324	75	84	83	86	0.779066	1	0	0.0216378	1.73472e-18	hypothetical protein PSPPH_0324
PSPPH_1799	226	194	222	177	0.784686	1	0	0.0216378	1.73472e-18	benzoate transport protein
PSPPH_B0056	295	405	275	324	0.435301	1	0	0.0216378	1.73472e-18	DNA-damage-inducible protein
PSPPH_4140	146	133	153	148	0.719217	1	0	0.0216378	1.73472e-18	toluene tolerance protein Ttg2F
PSPPH_2529	11	15	18	5	0.721155	1	0	0.0216378	1.73472e-18	type III secretion component
PSPPH_3405	338	322	394	296	0.827456	1	0	0.0216378	1.73472e-18	flagellar hook protein FlgE
PSPPH_1681	75	67	67	57	0.560426	1	0	0.0216378	1.73472e-18	ABC transporter ATP-binding protein
PSPPH_0713	5641	9090.5	5226	8094	0.645558	1	0	0.0216378	1.73472e-18	50S ribosomal protein L21
PSPPH_1062	13	6	11	6	0.768405	1	0	0.0216378	1.73472e-18	hypothetical protein PSPPH_1062
PSPPH_0865	75	77	64	54	0.256404	1	0	0.0216378	1.73472e-18	deoxyribose-phosphate aldolase
PSPPH_1350	98	71	110	82	0.574137	1	0	0.0216378	1.73472e-18	major facilitator family transporter
PSPPH_5100	105	94	95	84	0.614389	1	0	0.0216378	1.73472e-18	NAD(P) transhydrogenase subunit beta
PSPPH_0638	254	234.5	216	185	0.325858	1	0	0.0216378	1.73472e-18	nucleotidyltransferase family protein
PSPPH_3139	101	98	80	87	0.401422	1	0	0.0216378	1.73472e-18	cysteine desulfurase
PSPPH_3899	1066	899	1329	949	0.468685	1	0	0.0216378	1.73472e-18	glycerol kinase
PSPPH_2489	126	117	141	101	0.91597	1	0	0.0216378	1.73472e-18	GAF domain-containing protein
PSPPH_0925	355.5	313.5	365	276	0.836796	1	0	0.0216378	1.73472e-18	3-phosphoshikimate 1-carboxyvinyltransferase
PSPPH_3922	126	137	139	115	0.846191	1	0	0.0216378	1.73472e-18	hypothetical protein PSPPH_3922
PSPPH_4943	17	23	27	29	0.233069	1	0	0.0216378	1.73472e-18	hypothetical protein PSPPH_4943
PSPPH_4948	103.5	100	72	95	0.341199	1	0	0.0216378	1.73472e-18	hypothetical protein PSPPH_4948
PSPPH_0077	97	83	94	96	0.800469	1	0	0.0216378	1.73472e-18	LysR family transcriptional regulator
PSPPH_4678	11	11	11	7	0.664229	1	0	0.0216378	1.73472e-18	hypothetical protein PSPPH_4678
PSPPH_2848	266	250	208	148	0.0640204	1	0	0.0216378	1.73472e-18	XpsI
PSPPH_0366	61	59	62	53	0.850654	1	0	0.0216378	1.73472e-18	sec-independent translocase
PSPPH_2990	68	65	55	36	0.0938889	1	0	0.0216378	1.73472e-18	phytase domain-containing protein
PSPPH_1253	18	14	20	20	0.469262	1	0	0.0216378	1.73472e-18	lipoprotein
PSPPH_3871	315	328	311	288	0.732683	1	0	0.0216378	1.73472e-18	hypothetical protein PSPPH_3871
PSPPH_4160	68	555	66	405	0.159503	1	0	0.0216378	1.73472e-18	fumarate hydratase
PSPPH_4011	154	142	136	105	0.312142	1	0	0.0216378	1.73472e-18	hypothetical protein PSPPH_4011
PSPPH_0429	70	89	75	95	0.795899	1	0	0.0216378	1.73472e-18	acyltransferase family protein
PSPPH_0097	392	391	351	385	0.754412	1	0	0.0216378	1.73472e-18	pyridine nucleotide-disulfide oxidoreductase
PSPPH_0490	82	81	75	76	0.742124	1	0	0.0216378	1.73472e-18	allophanate hydrolase/urea amidolyase-like protein
PSPPH_0482	333	294	365	325	0.628952	1	0	0.0216378	1.73472e-18	type IV pilus biogenesis protein PilJ
PSPPH_1106	46	56	54	44	0.832033	1	0	0.0216378	1.73472e-18	hypothetical protein PSPPH_1106
PSPPH_2492	115	94	111	82	0.704536	1	0	0.0216378	1.73472e-18	acetylornithine aminotransferase
PSPPH_0812	416	339	371	269	0.396444	1	0	0.0216378	1.73472e-18	outer membrane efflux protein
PSPPH_2283	154	96	158	109	0.753286	1	0	0.0216378	1.73472e-18	hypothetical protein PSPPH_2283
PSPPH_0525	515	439	450	475	0.883124	1	0	0.0216378	1.73472e-18	hypothetical protein PSPPH_0525
PSPPH_1026	23	30	25	25	0.810432	1	0	0.0216378	1.73472e-18	hypothetical protein PSPPH_1026
PSPPH_4840	309	238	271.5	226	0.642339	1	0	0.0216378	1.73472e-18	Na+/H+ antiporter NhaP
PSPPH_5179	143	126	137	146	0.814835	1	0	0.0216378	1.73472e-18	adenylylsulfate kinase
PSPPH_3534	214	177	169	157	0.379037	1	0	0.0216378	1.73472e-18	major facilitator superfamily transporter
PSPPH_2266	513	439	469	428	0.771552	1	0	0.0216378	1.73472e-18	alkyl hydroperoxide reductase subunit F
PSPPH_1863	59	58	58.5	71	0.66885	1	0	0.0216378	1.73472e-18	hypothetical protein PSPPH_1863
PSPPH_A0101	196	122	169	124	0.708981	1	0	0.0216378	1.73472e-18	DNA invertase
PSPPH_3992	440	522	457	541	0.865558	1	0	0.0216378	1.73472e-18	pectin lyase
PSPPH_0271	103	86	89	58	0.2492	1	0	0.0216378	1.73472e-18	Sco1/SenC family protein
PSPPH_3147	48	33	45	30	0.783044	1	0	0.0216378	1.73472e-18	group 1 glycosyl transferase family protein
PSPPH_3695	175	185	188	182	0.880033	1	0	0.0216378	1.73472e-18	nicotinate-nucleotide--dimethylbenzimidazole phosphoribosyltransferase
PSPPH_2697	50	30	35	32	0.498688	1	0	0.0216378	1.73472e-18	peptide ABC transporter ATP-binding protein
PSPPH_4644	72	61	66	64	0.862845	1	0	0.0216378	1.73472e-18	Cu(I)-responsive transcriptional regulator
PSPPH_2212	657	701	652	628	0.763748	1	0	0.0216378	1.73472e-18	hypothetical protein PSPPH_2212
PSPPH_0237	223	160	188	146	0.49162	1	0	0.0216378	1.73472e-18	type IV pilus biogenesis protein
PSPPH_1654	615	523	556	495	0.68761	1	0	0.0216378	1.73472e-18	aspartate-semialdehyde dehydrogenase
PSPPH_1495	189	166	210	174	0.696825	1	0	0.0216378	1.73472e-18	vacJ lipoprotein
PSPPH_0475	95	122	135	108	0.614521	1	0	0.0216378	1.73472e-18	Holliday junction resolvase-like protein
PSPPH_1249	69	60	56	54	0.499695	1	0	0.0216378	1.73472e-18	glutathione S-transferase
PSPPH_2554	400	324	368	279	0.578221	1	0	0.0216378	1.73472e-18	tartrate dehydrogenase
PSPPH_B0019	282	190	291	343	0.139053	1	0	0.0216378	1.73472e-18	hypothetical protein PSPPH_B0019
PSPPH_1893	51	49	43	35	0.328173	1	0	0.0216378	1.73472e-18	prophage PSPPH02 chitinase
PSPPH_1465	109	102	127	105	0.658322	1	0	0.0216378	1.73472e-18	hypothetical protein PSPPH_1465
PSPPH_3608	68	39	61	28	0.460413	1	0	0.0216378	1.73472e-18	ABC transporter ATP-binding protein
PSPPH_2317	424	499	455	462	0.939894	1	0	0.0216378	1.73472e-18	phosphoglucomutase
PSPPH_0061	402	430	431	383	0.916875	1	0	0.0216378	1.73472e-18	anti-RNA polymerase sigma 70 factor
PSPPH_0934	28	17	22.5	12	0.353085	1	0	0.0216378	1.73472e-18	TRAP dicarboxylate transporter, DctQ subunit
PSPPH_1162	411	398	439.5	346	0.878888	1	0	0.0216378	1.73472e-18	glycine dehydrogenase
PSPPH_1768	33	38	39	36	0.780981	1	0	0.0216378	1.73472e-18	hypothetical protein PSPPH_1768
PSPPH_1374	85	76	68	71	0.516821	1	0	0.0216378	1.73472e-18	LuxR family DNA-binding response regulator
PSPPH_4602	8506	8333	7682	7549	0.64686	1	0	0.0216378	1.73472e-18	50S ribosomal protein L1
PSPPH_1312	933	1020	782	900	0.458204	1	0	0.0216378	1.73472e-18	co-chaperone HscB
PSPPH_1428	723	647	816	669	0.688149	1	0	0.0216378	1.73472e-18	ATP-dependent helicase HrpA
PSPPH_4573	10411.5	11114.5	8684	9353	0.424547	1	0	0.0216378	1.73472e-18	50S ribosomal protein L15
PSPPH_3549	17	27	27	25	0.550776	1	0	0.0216378	1.73472e-18	hypothetical protein PSPPH_3549
PSPPH_1489	65.5	64	59	52	0.521262	1	0	0.0216378	1.73472e-18	GGDEF domain-containing protein
PSPPH_0392	86	69	84	89	0.622768	1	0	0.0216378	1.73472e-18	type IV pilus biogenesis protein PilO
PSPPH_1823	82	275	67	204	0.171801	1	0	0.0216378	1.73472e-18	hypothetical protein PSPPH_1823
PSPPH_2802	33	32	29	34	0.80388	1	0	0.0216378	1.73472e-18	aminotransferase
PSPPH_1466	81	57	111	79	0.136966	1	0	0.0216378	1.73472e-18	hypothetical protein PSPPH_1466
PSPPH_4288	577	448	601	477	0.805086	1	0	0.0216378	1.73472e-18	ATP-dependent protease
PSPPH_4256	160	144	180	118	0.893468	1	0	0.0216378	1.73472e-18	sensor histidine kinase
PSPPH_1307	246	202	232	194	0.803761	1	0	0.0216378	1.73472e-18	serine O-acetyltransferase
PSPPH_3730	610	1014	579	1078	0.923095	1	0	0.0216378	1.73472e-18	DNA-binding response regulator PhoP
PSPPH_4276	90	91	84	86	0.787493	1	0	0.0216378	1.73472e-18	glycine betaine/carnitine/choline ABC transporter ATP-binding protein
PSPPH_3863	970	1012	1074	1062	0.712635	1	0	0.0216378	1.73472e-18	adenylate kinase
PSPPH_1320	1235	1101	1308	1141	0.815815	1	0	0.0216378	1.73472e-18	4-hydroxy-3-methylbut-2-en-1-yl diphosphate synthase
PSPPH_0163	0	0	1	1	0.502556	1	0	0.0216378	1.73472e-18	ISPsy20, transposase IstA
PSPPH_3701	487.5	381	469	351	0.771136	1	0	0.0216378	1.73472e-18	cobyrinic acid a,c-diamide synthase
PSPPH_1812	373	314	365	326	0.928803	1	0	0.0216378	1.73472e-18	chorismate synthase
PSPPH_1445	15	7	17	15	0.261383	1	0	0.0216378	1.73472e-18	hypothetical protein PSPPH_1445
PSPPH_1583	70	116	62	114	0.824244	1	0	0.0216378	1.73472e-18	hypothetical protein PSPPH_1583
PSPPH_1798	240	236	259	226	0.891846	1	0	0.0216378	1.73472e-18	muramoyltetrapeptide carboxypeptidase
PSPPH_2519	18	16	23	7	0.744919	1	0	0.0216378	1.73472e-18	type III secretion component
PSPPH_2244	63	108	51	93	0.423655	1	0	0.0216378	1.73472e-18	hypothetical protein PSPPH_2244
PSPPH_1055	79.5	62	91	71	0.558208	1	0	0.0216378	1.73472e-18	acyltransferase
PSPPH_0448	308	365	485	473	0.0759785	1	0	0.0216378	1.73472e-18	hypothetical protein PSPPH_0448
PSPPH_4558	277	191	249	195	0.799836	1	0	0.0216378	1.73472e-18	MutT domain-containing protein
PSPPH_4563	1423	1197	1408	1134	0.884739	1	0	0.0216378	1.73472e-18	excinuclease ABC subunit A
PSPPH_3117	93	101	128	128	0.181169	1	0	0.0216378	1.73472e-18	NADH dehydrogenase subunit J
PSPPH_4523	222	243	229	248	0.897927	1	0	0.0216378	1.73472e-18	fumarylacetoacetate hydrolase family protein
PSPPH_3155	54	54	56	57	0.800384	1	0	0.0216378	1.73472e-18	LysR family transcriptional regulator
PSPPH_3371	307	329	265	364	0.923961	1	0	0.0216378	1.73472e-18	flagellar protein FliO
PSPPH_3750	242	184	254	197	0.774054	1	0	0.0216378	1.73472e-18	non-ribosomal peptide synthetase
PSPPH_4690	71	64	51	61	0.450114	1	0	0.0216378	1.73472e-18	formate transporter
PSPPH_2777	46	49	34	48	0.567535	1	0	0.0216378	1.73472e-18	zinc-binding oxidoreductase, truncated
PSPPH_1019	106	84	104	81	0.875704	1	0	0.0216378	1.73472e-18	hypoxanthine-guanine phosphoribosyltransferase
PSPPH_1714	125	84	111	75	0.592911	1	0	0.0216378	1.73472e-18	serine acetyltransferase
PSPPH_3453	24	15	26	13	0.853107	1	0	0.0216378	1.73472e-18	DNA-binding response regulator QseB
PSPPH_2810	722	695	610	597	0.421266	1	0	0.0216378	1.73472e-18	dolichyl-phosphate-mannose-protein mannosyltransferase family protein
PSPPH_4494	233	237	211	216	0.639501	1	0	0.0216378	1.73472e-18	AsmA family protein
PSPPH_4127	183	127	163	132	0.805735	1	0	0.0216378	1.73472e-18	AraC family transcriptional regulator
PSPPH_1338	344	405	349	375	0.870072	1	0	0.0216378	1.73472e-18	multicopper oxidase
PSPPH_1682	37	33	41	36	0.733296	1	0	0.0216378	1.73472e-18	ABC transporter ATP-binding protein
PSPPH_1343	158	127	162	140	0.780893	1	0	0.0216378	1.73472e-18	hypothetical protein PSPPH_1343
PSPPH_5206	1820	1810	1708	1597	0.653265	1	0	0.0216378	1.73472e-18	F0F1 ATP synthase subunit epsilon
PSPPH_0918	22	22	18	18	0.559986	1	0	0.0216378	1.73472e-18	acetyltransferase
PSPPH_3041	153	161	129	176	0.866079	1	0	0.0216378	1.73472e-18	sensor histidine kinase
PSPPH_0799	38	56	30	56	0.733677	1	0	0.0216378	1.73472e-18	hypothetical protein PSPPH_0799
PSPPH_5040	37	46	40	35	0.70072	1	0	0.0216378	1.73472e-18	4-aminobutyrate transaminase
PSPPH_5131	146	84	112	91	0.55363	1	0	0.0216378	1.73472e-18	hypothetical protein PSPPH_5131
PSPPH_1429	348	339.5	384	327	0.857651	1	0	0.0216378	1.73472e-18	3-oxoacyl-(acyl carrier protein) synthase III
PSPPH_4050	37.5	36	35	35	0.823632	1	0	0.0216378	1.73472e-18	YceI-like family protein
PSPPH_0850	343	342	366	286	0.803641	1	0	0.0216378	1.73472e-18	acetyl-CoA acetyltransferase
PSPPH_2222	124	119	122	114	0.870946	1	0	0.0216378	1.73472e-18	hypothetical protein PSPPH_2222
PSPPH_1821	78	68	64	68	0.656192	1	0	0.0216378	1.73472e-18	hypothetical protein PSPPH_1821
PSPPH_5121	170	160	184	158	0.858852	1	0	0.0216378	1.73472e-18	phosphate ABC transporter permease
PSPPH_1947	81.5	69	86	61	0.851883	1	0	0.0216378	1.73472e-18	hypothetical protein PSPPH_1947
PSPPH_0054	513	398	462	317	0.433914	1	0	0.0216378	1.73472e-18	lead uptake protein
PSPPH_4554	270	238	201	189	0.189355	1	0	0.0216378	1.73472e-18	arginine aminomutase
PSPPH_1450	8	8	19	15	0.0402157	1	0.01	0.0386753	0.00252968	Rhs family protein
PSPPH_2594	158	124	199	150	0.299971	1	0	0.0216378	1.73472e-18	ABC transporter MtlK
PSPPH_0682	56	40	56	49	0.693551	1	0	0.0216378	1.73472e-18	hypothetical protein PSPPH_0682
PSPPH_0307	481	495	501	446	0.873871	1	0	0.0216378	1.73472e-18	2-octaprenyl-6-methoxyphenyl hydroxylase
PSPPH_2909	50	45	54	45	0.85222	1	0	0.0216378	1.73472e-18	luciferase family protein
PSPPH_4419	195	165	184	152	0.729606	1	0	0.0216378	1.73472e-18	LuxR family DNA binding response regulator
PSPPH_1611	47	33	45	37	0.842788	1	0	0.0216378	1.73472e-18	dihydrodipicolinate synthetase family protein
PSPPH_3188	70	42	63.5	48	0.857287	1	0	0.0216378	1.73472e-18	myo-inositol 2-dehydrogenase
PSPPH_2079	511	415	480	412	0.852675	1	0	0.0216378	1.73472e-18	23S rRNA m(2)G2445 methyltransferase
PSPPH_4691	27	24	27	24	0.826617	1	0	0.0216378	1.73472e-18	amino acid transporter LysE
PSPPH_1961	374	672	347	498	0.287319	1	0	0.0216378	1.73472e-18	zinc-binding oxidoreductase
PSPPH_2569	74.5	79	68	75	0.773335	1	0	0.0216378	1.73472e-18	glutathione-independent formaldehyde dehydrogenase
PSPPH_4338	27	26	26	24	0.822041	1	0	0.0216378	1.73472e-18	hypothetical protein PSPPH_4338
PSPPH_2783	127	112	126	102	0.822626	1	0	0.0216378	1.73472e-18	GgtA
PSPPH_0367	119	132	181	180	0.0765075	1	0	0.0216378	1.73472e-18	twin arginine translocase protein A
PSPPH_2482	58	50	50	51	0.794306	1	0	0.0216378	1.73472e-18	hypothetical protein PSPPH_2482
PSPPH_4977	197	182.5	177	192	0.860905	1	0	0.0216378	1.73472e-18	prophage PSPPH06, GNAT family acetyltransferase
PSPPH_2929	67	91	74	72	0.712983	1	0	0.0216378	1.73472e-18	phosphonate metabolism protein PhnN
PSPPH_2057	218	193	260	229	0.376337	1	0	0.0216378	1.73472e-18	methylcitrate synthase
PSPPH_0498	91	156	122	204	0.170138	1	0	0.0216378	1.73472e-18	alginate lyase
PSPPH_3862	292	247	266	230	0.692047	1	0	0.0216378	1.73472e-18	hypothetical protein PSPPH_3862
PSPPH_1311	676	731	649	710	0.867016	1	0	0.0216378	1.73472e-18	iron-sulfur cluster assembly protein IscA
PSPPH_3952	1744	2083	2069	2388	0.465873	1	0	0.0216378	1.73472e-18	protease Do
PSPPH_4446	204	208	245	198	0.720513	1	0	0.0216378	1.73472e-18	hypothetical protein PSPPH_4446
PSPPH_4122	72	101.5	103	84	0.733525	1	0	0.0216378	1.73472e-18	lipoprotein
PSPPH_4016	96	92	101	110	0.605107	1	0	0.0216378	1.73472e-18	dicarboxylic acid transport protein
PSPPH_2605	176	257	151	205	0.32298	1	0	0.0216378	1.73472e-18	response regulator
PSPPH_0951	219	159	209	171	0.904263	1	0	0.0216378	1.73472e-18	glycosyltransferase WbpZ
PSPPH_0993	637	956	629	969	0.95477	1	0	0.0216378	1.73472e-18	4-diphosphocytidyl-2-C-methyl-D-erythritol kinase
PSPPH_4620	43	36	40	29	0.602714	1	0	0.0216378	1.73472e-18	LysR family transcriptional regulator
PSPPH_3662	28920.5	25097	27708.5	25560	0.952196	1	0	0.0216378	1.73472e-18	30S ribosomal protein S1
PSPPH_2738	42	34	34	30	0.558899	1	0	0.0216378	1.73472e-18	glutamate-1-semialdehyde aminotransferase
PSPPH_5013	356	309	401	291	0.839988	1	0	0.0216378	1.73472e-18	adenylate cyclase
PSPPH_2769	15	9	10	12	0.805158	1	0	0.0216378	1.73472e-18	TrapT dctQ-M fusion permease, dicarboxylate transport
PSPPH_0534	335.5	294.5	312	245	0.539627	1	0	0.0216378	1.73472e-18	outer membrane efflux protein TolC
PSPPH_2522	16	11	9	17	0.822993	1	0	0.0216378	1.73472e-18	hypothetical protein PSPPH_2522
PSPPH_3430	181.5	198	218	166	0.903355	1	0	0.0216378	1.73472e-18	decarboxylase family protein
PSPPH_0960	417	311.5	451	381	0.512069	1	0	0.0216378	1.73472e-18	glycosyl transferase, group 2 family protein
PSPPH_0950	591.5	500	541	444	0.616726	1	0	0.0216378	1.73472e-18	methyl-accepting chemotaxis protein
PSPPH_1065	183	128	146	120	0.433813	1	0	0.0216378	1.73472e-18	hypothetical protein PSPPH_1065
PSPPH_4055	59	62	64	73	0.603666	1	0	0.0216378	1.73472e-18	hypothetical protein PSPPH_4055
PSPPH_3229	90	85	100	69	0.826874	1	0	0.0216378	1.73472e-18	group 1 glycosyl transferase family protein
PSPPH_2566	74.5	96	64	64	0.187151	1	0	0.0216378	1.73472e-18	3-oxoadipate enol-lactonase
PSPPH_0912	12	8	10	14	0.788151	1	0	0.0216378	1.73472e-18	TonB system transport protein
PSPPH_4093	229	229	265	218	0.797775	1	0	0.0216378	1.73472e-18	nucleotide-binding protein
PSPPH_3873	380	398	426	363	0.928356	1	0	0.0216378	1.73472e-18	lysyl-tRNA synthetase
PSPPH_4434	50.5	69	66	57	0.877685	1	0	0.0216378	1.73472e-18	type II/III secretion system protein
PSPPH_4778	1124	1199	1203	1205	0.86363	1	0	0.0216378	1.73472e-18	RNA polymerase factor sigma-32
PSPPH_2342	48	36	57	36	0.652551	1	0	0.0216378	1.73472e-18	hypothetical protein PSPPH_2342
PSPPH_2298	65	72	62	53	0.427092	1	0	0.0216378	1.73472e-18	high-affinity nickel-transport protein
PSPPH_4882	178	143	186	156	0.773383	1	0	0.0216378	1.73472e-18	hypothetical protein PSPPH_4882
PSPPH_4455	23	21	26	13	0.720184	1	0	0.0216378	1.73472e-18	hypothetical protein PSPPH_4455
PSPPH_5128	65	176	65	179	0.916868	1	0	0.0216378	1.73472e-18	hypothetical protein PSPPH_5128
PSPPH_0846	661	419	535	357	0.341419	1	0	0.0216378	1.73472e-18	DNA-binding transcriptional regulator FruR
PSPPH_0765	152	152	151	151	0.896238	1	0	0.0216378	1.73472e-18	hypothetical protein PSPPH_0765
PSPPH_2652	226	217	227	207	0.908459	1	0	0.0216378	1.73472e-18	ABC transporter ATP-binding protein
PSPPH_3591	499	390	436	332	0.462828	1	0	0.0216378	1.73472e-18	hypothetical protein PSPPH_3591
PSPPH_2977	14	7	11	6	0.663565	1	0	0.0216378	1.73472e-18	transcription antitermination protein
PSPPH_1856	1152	1032	1500	1377	0.177303	1	0	0.0216378	1.73472e-18	soluble pyridine nucleotide transhydrogenase
PSPPH_4401	65	70	78	61	0.843391	1	0	0.0216378	1.73472e-18	hypothetical protein PSPPH_4401
PSPPH_2282	138	101	114	82	0.349099	1	0	0.0216378	1.73472e-18	Rhs family protein
PSPPH_3326	191	199	248	255	0.202926	1	0	0.0216378	1.73472e-18	aconitate hydratase
PSPPH_2997	30	26	30	21	0.714261	1	0	0.0216378	1.73472e-18	hypothetical protein PSPPH_2997
PSPPH_0089	67	68	100.5	66	0.325185	1	0	0.0216378	1.73472e-18	sulfate-binding protein
PSPPH_2110	119	126	151	146	0.348434	1	0	0.0216378	1.73472e-18	molybdopterin-guanine dinucleotide biosynthesis protein MobA
PSPPH_2966	296	213	226	192	0.327284	1	0	0.0216378	1.73472e-18	methyl-accepting chemotaxis protein
PSPPH_4274	54	35	60	59	0.209311	1	0	0.0216378	1.73472e-18	F-box domain-containing protein
PSPPH_1353	1625.5	1330.5	1434	1187	0.558419	1	0	0.0216378	1.73472e-18	signal recognition particle protein
PSPPH_3367	137	153	119	119	0.339712	1	0	0.0216378	1.73472e-18	flagellar biosynthesis protein FlhB
PSPPH_2648	251	217	239	237	0.88892	1	0	0.0216378	1.73472e-18	glycogen branching enzyme
PSPPH_3746	70	41	57	41	0.591878	1	0	0.0216378	1.73472e-18	hypothetical protein PSPPH_3746
PSPPH_4846	805	790	898	750	0.878012	1	0	0.0216378	1.73472e-18	thiamine biosynthesis protein ThiI
PSPPH_4871	74	55	71	75	0.604046	1	0	0.0216378	1.73472e-18	hypothetical protein PSPPH_4871
PSPPH_0737	122	81	119	77	0.866024	1	0	0.0216378	1.73472e-18	type IV pilus sensor protein PilS
PSPPH_1506	48	39	43	36	0.72667	1	0	0.0216378	1.73472e-18	hypothetical protein PSPPH_1506
PSPPH_4269	103	79	92	77	0.730086	1	0	0.0216378	1.73472e-18	hypothetical protein PSPPH_4269
PSPPH_3780	177	316	162.5	272	0.527945	1	0	0.0216378	1.73472e-18	hypothetical protein PSPPH_3780
PSPPH_3645	54	41	54	30	0.61346	1	0	0.0216378	1.73472e-18	MarR family transcriptional regulator
PSPPH_3202	852	741	763	618	0.476391	1	0	0.0216378	1.73472e-18	transcriptional regulator PsrA
PSPPH_4067	93	55	93	62	0.808431	1	0	0.0216378	1.73472e-18	pyridoxamine 5'-phosphate oxidase family protein
PSPPH_4237	123	101	122	100	0.879534	1	0	0.0216378	1.73472e-18	peptide ABC transporter permease
PSPPH_2375	30	31	29	24	0.618297	1	0	0.0216378	1.73472e-18	NtaA/SnaA/SoxA family monooxygenase
PSPPH_2321	43	36	46	43	0.609224	1	0	0.0216378	1.73472e-18	peptide ABC transporter permease
PSPPH_2001	342	359	371	284	0.742589	1	0	0.0216378	1.73472e-18	lipoprotein
PSPPH_4077	6520.5	5595	10519	8940	0.0314868	1	0	0.0216378	1.73472e-18	chaperonin GroEL
PSPPH_4353	203	145	194	142	0.851727	1	0	0.0216378	1.73472e-18	pyridine nucleotide-disulfide oxidoreductase domain-containing protein
PSPPH_2021	332	322	326	284	0.723246	1	0	0.0216378	1.73472e-18	sensor protein KdpD
PSPPH_2988	19	9	14	7	0.47384	1	0	0.0216378	1.73472e-18	tolR protein
PSPPH_1933	132	495	125	518	0.903721	1	0	0.0216378	1.73472e-18	Tat pathway signal sequence domain-containing protein
PSPPH_3157	263	217	238	209	0.728875	1	0	0.0216378	1.73472e-18	3-oxoadipate CoA-succinyl transferase subunit beta
PSPPH_4033	4	5	6	4	0.83361	1	0	0.0216378	1.73472e-18	hypothetical protein PSPPH_4033
PSPPH_1886	765	866	628	871	0.684061	1	0	0.0216378	1.73472e-18	hypothetical protein PSPPH_1886
PSPPH_2425	111	123.5	81	115	0.410237	1	0	0.0216378	1.73472e-18	trehalose synthase
PSPPH_3626	183	189	211	204	0.590487	1	0	0.0216378	1.73472e-18	GAF domain-containing protein
PSPPH_3429	99	190	94	165	0.611934	1	0	0.0216378	1.73472e-18	hypothetical protein PSPPH_3429
PSPPH_2807	24	25	30	19	0.870328	1	0	0.0216378	1.73472e-18	hypothetical protein PSPPH_2807
PSPPH_3053	66	58	69	67	0.706986	1	0	0.0216378	1.73472e-18	phospholipase/carboxylesterase family protein
PSPPH_0282	64	53	66	54	0.851424	1	0	0.0216378	1.73472e-18	amino acid ABC transporter ATP-binding protein
PSPPH_3209	452	417	457	385	0.866398	1	0	0.0216378	1.73472e-18	3-ketoacyl-CoA thiolase
PSPPH_2663	58	56	61	52	0.870276	1	0	0.0216378	1.73472e-18	amino acid ABC transporter ATP-binding protein
PSPPH_4724	94	72	85	66	0.682754	1	0	0.0216378	1.73472e-18	Tat pathway signal sequence domain-containing protein
PSPPH_4203	464	433.5	584	485	0.376516	1	0	0.0216378	1.73472e-18	carbamoyl phosphate synthase small subunit
PSPPH_3342	59	83	61	51	0.290258	1	0	0.0216378	1.73472e-18	prevent-host-death family protein
PSPPH_4047	34	27	25	29	0.728466	1	0	0.0216378	1.73472e-18	hypothetical protein PSPPH_4047
PSPPH_2013	78	75	71	49	0.255594	1	0	0.0216378	1.73472e-18	type I fimbrial protein FimA
PSPPH_3047	76	59	50	58	0.318862	1	0	0.0216378	1.73472e-18	major facilitator family transporter
PSPPH_4311	436	333	508	354	0.567242	1	0	0.0216378	1.73472e-18	fatty acid desaturase
PSPPH_0126	44.5	32	40	36	0.866912	1	0	0.0216378	1.73472e-18	hypothetical protein PSPPH_0126
PSPPH_4813	43	26	53	37	0.284222	1	0	0.0216378	1.73472e-18	renal dipeptidase family protein
PSPPH_A0026	219	241	200	202	0.509871	1	0	0.0216378	1.73472e-18	hypothetical protein PSPPH_A0026
PSPPH_1954	855	918	541	979	0.448693	1	0	0.0216378	1.73472e-18	3-isopropylmalate dehydrogenase
PSPPH_4741	99	90	101	77	0.794632	1	0	0.0216378	1.73472e-18	hypothetical protein PSPPH_4741
PSPPH_4304	63	60	71	49	0.85111	1	0	0.0216378	1.73472e-18	HAD superfamily hydrolase
PSPPH_4811	45	37	40	43	0.832419	1	0	0.0216378	1.73472e-18	NADH:flavin oxidoreductase/NADH oxidase family protein
PSPPH_0200	417	387	396	371	0.814618	1	0	0.0216378	1.73472e-18	hypothetical protein PSPPH_0200
PSPPH_1144	17	12	26	19	0.13994	1	0	0.0216378	1.73472e-18	hypothetical protein PSPPH_1144
PSPPH_1044	33	19	33	10	0.524543	1	0	0.0216378	1.73472e-18	4-hydroxyphenylacetate 3-monooxygenase, reductase component
PSPPH_3689	1140	1005	1421	969	0.594907	1	0	0.0216378	1.73472e-18	outer membrane protein
PSPPH_4004	537	464	527	442	0.879922	1	0	0.0216378	1.73472e-18	chaperone protein HscC
PSPPH_4169	95	64	86	82	0.816191	1	0	0.0216378	1.73472e-18	Maf-like protein
PSPPH_2159	857	603	662	496	0.247566	1	0	0.0216378	1.73472e-18	isocitrate/isopropylmalate family dehydrogenase
PSPPH_1518	511	700	709	899	0.156802	1	0	0.0216378	1.73472e-18	ATP-dependent DNA helicase RecQ
PSPPH_0207	453	457.5	553	489	0.501506	1	0	0.0216378	1.73472e-18	alginate biosynthesis protein AlgC
PSPPH_2921	107	96	95	100	0.843228	1	0	0.0216378	1.73472e-18	LysR family transcriptional regulator
PSPPH_1436	95	115	118	122	0.532828	1	0	0.0216378	1.73472e-18	hypothetical protein PSPPH_1436
PSPPH_4748	49	44	41	44	0.760603	1	0	0.0216378	1.73472e-18	glycine/betaine/L-proline ABC transporter permease
PSPPH_4191	1752	2184	1470.5	1871	0.427913	1	0	0.0216378	1.73472e-18	hypothetical protein PSPPH_4191
PSPPH_0407	65	43	48.5	37	0.332894	1	0	0.0216378	1.73472e-18	gluconate transporter family protein
PSPPH_4785	175	142	172	146	0.910426	1	0	0.0216378	1.73472e-18	ATP-binding protein
PSPPH_4406	178	160	163	159	0.826895	1	0	0.0216378	1.73472e-18	rod shape-determining protein RodA
PSPPH_1385	73	68	73	63	0.838899	1	0	0.0216378	1.73472e-18	succinylglutamate desuccinylase/aspartoacylase family protein
PSPPH_0949	95	88	103.5	123	0.313424	1	0	0.0216378	1.73472e-18	DnaJ domain-containing protein
PSPPH_0330	81	70	90	58	0.857215	1	0	0.0216378	1.73472e-18	hypothetical protein PSPPH_0330
PSPPH_0402	131	104	108	89	0.386582	1	0	0.0216378	1.73472e-18	hypothetical protein PSPPH_0402
PSPPH_0586	60	77.5	55	77	0.839932	1	0	0.0216378	1.73472e-18	azurin
PSPPH_3179	68	262	67	217	0.484357	1	0	0.0216378	1.73472e-18	hypothetical protein PSPPH_3179
PSPPH_3837	1435	1541	1530.5	1461	0.966246	1	0	0.0216378	1.73472e-18	ribosome recycling factor
PSPPH_3723	99	84.5	76	54	0.108356	1	0	0.0216378	1.73472e-18	arsenate reductase
PSPPH_1131	147	59	167	111	0.156747	1	0	0.0216378	1.73472e-18	amino acid ABC transporter permease
PSPPH_4396	210.5	180	213	202	0.769078	1	0	0.0216378	1.73472e-18	DNA polymerase III subunit delta
PSPPH_4583	7938	8680.5	7445	7456	0.618888	1	0	0.0216378	1.73472e-18	30S ribosomal protein S17
PSPPH_0257	419.5	509	469	449	0.938058	1	0	0.0216378	1.73472e-18	thiol:disulfide interchange protein DsbA
PSPPH_0251	63	69	57	71	0.857212	1	0	0.0216378	1.73472e-18	osmotically inducible protein
PSPPH_3081	43	35	35	34	0.647998	1	0	0.0216378	1.73472e-18	citrate transporter
PSPPH_2445	97	84	72	61	0.160102	1	0	0.0216378	1.73472e-18	hypothetical protein PSPPH_2445
PSPPH_1621	215	247	225.5	240	0.913271	1	0	0.0216378	1.73472e-18	acyl-CoA dehydrogenase
PSPPH_2842	345	269	285	231	0.382859	1	0	0.0216378	1.73472e-18	lipoprotein
PSPPH_4896	287	213	269	197	0.741629	1	0	0.0216378	1.73472e-18	aminotransferase
PSPPH_2698	45	32	49	25	0.828357	1	0	0.0216378	1.73472e-18	peptide ABC transporter ATP-binding protein
PSPPH_1617	132	106	132	77	0.543353	1	0	0.0216378	1.73472e-18	MarR family transcriptional regulator
PSPPH_0409	231	225	175.5	207	0.383915	1	0	0.0216378	1.73472e-18	hypothetical protein PSPPH_0409
PSPPH_4148	236	200	233.5	200	0.914882	1	0	0.0216378	1.73472e-18	hypothetical protein PSPPH_4148
PSPPH_4783	166	162	141	139	0.44082	1	0	0.0216378	1.73472e-18	M16 family peptidase
PSPPH_2589	94	101	84	91	0.641702	1	0	0.0216378	1.73472e-18	zinc-binding oxidoreductase
PSPPH_0780	1453.5	1028	1240.5	899	0.465367	1	0	0.0216378	1.73472e-18	OMP85 family outer membrane protein
PSPPH_3279	104	69	107	74	0.831421	1	0	0.0216378	1.73472e-18	phenazine biosynthesis family protein
PSPPH_0752	314	183	242	183	0.42532	1	0	0.0216378	1.73472e-18	DNA topoisomerase III
PSPPH_0708	128	98	122	72	0.492419	1	0	0.0216378	1.73472e-18	tRNA 2-selenouridine synthase
PSPPH_2872	395	353	311.5	303	0.326691	1	0	0.0216378	1.73472e-18	anaerobic nitric oxide reductase transcription regulator
PSPPH_3001	78	66	84	51	0.734494	1	0	0.0216378	1.73472e-18	dipeptide ABC transporter permease DppC
PSPPH_0400	558.5	658	767	736	0.291517	1	0	0.0216378	1.73472e-18	glutamate synthase subunit beta
PSPPH_3840	11898	13270	11406	11845	0.723446	1	0	0.0216378	1.73472e-18	30S ribosomal protein S2
PSPPH_3347	15	19	19	13	0.830374	1	0	0.0216378	1.73472e-18	cbb3-type cytochrome oxidase maturation protein
PSPPH_3473	306.5	279	331	235	0.871428	1	0	0.0216378	1.73472e-18	sensory box sensor histidine kinase/response regulator
PSPPH_1075	164	136	181	143	0.71878	1	0	0.0216378	1.73472e-18	flavodoxin
PSPPH_4391	288	279	329	282	0.728958	1	0	0.0216378	1.73472e-18	apolipoprotein N-acyltransferase
PSPPH_2412	83	56	75	42	0.469717	1	0	0.0216378	1.73472e-18	methionyl-tRNA synthetase
PSPPH_0624	138.5	81	116	75	0.514996	1	0	0.0216378	1.73472e-18	dihydroneopterin aldolase
PSPPH_4344	164	173	185	173	0.771942	1	0	0.0216378	1.73472e-18	xanthine/uracil permease family protein
PSPPH_0493	278	342	258	266	0.405461	1	0	0.0216378	1.73472e-18	potassium/proton antiporter
PSPPH_3631	356	350	379	321	0.931126	1	0	0.0216378	1.73472e-18	aminotransferase AlaT
PSPPH_A0135	517	606	482.5	579	0.779195	1	0	0.0216378	1.73472e-18	resolvase
PSPPH_4218	21	13	19	15	0.840146	1	0	0.0216378	1.73472e-18	hypothetical protein PSPPH_4218
PSPPH_2367	94	88	84	66	0.382549	1	0	0.0216378	1.73472e-18	hypothetical protein PSPPH_2367
PSPPH_1396	54	38	43	42	0.776318	1	0	0.0216378	1.73472e-18	hypothetical protein PSPPH_1396
PSPPH_2468	67	54	65	61	0.849273	1	0	0.0216378	1.73472e-18	tartrate transporter
PSPPH_5186	21	23	25	19	0.865904	1	0	0.0216378	1.73472e-18	hemin ABC transporter permease
PSPPH_3359	438	328	433	282	0.74251	1	0	0.0216378	1.73472e-18	chemotaxis-specific methylesterase
PSPPH_3129	103	74	80	86	0.780651	1	0	0.0216378	1.73472e-18	lipoprotein
PSPPH_1136	80	69	66	71	0.697875	1	0	0.0216378	1.73472e-18	transcriptional regulatory protein
PSPPH_1007	128	113	130	113	0.899286	1	0	0.0216378	1.73472e-18	hypothetical protein PSPPH_1007
PSPPH_4102	1144	1110	1354	1273	0.45369	1	0	0.0216378	1.73472e-18	UDP-3-O-
PSPPH_3823	686.5	474	618	441	0.647786	1	0	0.0216378	1.73472e-18	tRNA(Ile)-lysidine synthetase
PSPPH_3088	1222	935	1140	979	0.935949	1	0	0.0216378	1.73472e-18	siroheme synthase
PSPPH_2719	85	85	91	69	0.791074	1	0	0.0216378	1.73472e-18	phospholysine phosphohistidine inorganic pyrophosphate phosphatase
PSPPH_5005	287	214	239	221	0.679311	1	0	0.0216378	1.73472e-18	site-specific tyrosine recombinase XerC
PSPPH_3385	412	395.5	348	353	0.466913	1	0	0.0216378	1.73472e-18	sigma-54 dependent DNA-binding response regulator FleR
PSPPH_4567	28843.5	24915	25631.5	22787	0.64991	1	0	0.0216378	1.73472e-18	DNA-directed RNA polymerase subunit alpha
PSPPH_2515	157	134	132	120	0.486542	1	0	0.0216378	1.73472e-18	hypothetical protein PSPPH_2515
PSPPH_1400	26	24	39	26	0.32041	1	0	0.0216378	1.73472e-18	hypothetical protein PSPPH_1400
PSPPH_3586	110	90	84	76	0.313789	1	0	0.0216378	1.73472e-18	BNR/Asp-box repeat-containing protein
PSPPH_0645	32	17	35	26	0.407986	1	0	0.0216378	1.73472e-18	polyamine ABC transporter permease
PSPPH_5219	587	449	572	413	0.803755	1	0	0.0216378	1.73472e-18	tRNA modification GTPase TrmE
PSPPH_3659	478	379	397	356	0.514547	1	0	0.0216378	1.73472e-18	metallo-beta-lactamase family protein
PSPPH_0436	50	48	49	38	0.636726	1	0	0.0216378	1.73472e-18	malonate decarboxylase subunit beta
PSPPH_0716	1229	1135	1012	857	0.245267	1	0	0.0216378	1.73472e-18	gamma-glutamyl kinase
PSPPH_0433	87	85	109	97	0.417236	1	0	0.0216378	1.73472e-18	malonate decarboxylase subunit alpha
PSPPH_4889	135	139	153	115	0.869525	1	0	0.0216378	1.73472e-18	hypothetical protein PSPPH_4889
PSPPH_3424	356	325	326	351	0.927265	1	0	0.0216378	1.73472e-18	hexapeptide repeat-containing transferase
PSPPH_2789	42	44	40	47	0.845962	1	0	0.0216378	1.73472e-18	hypothetical protein PSPPH_2789
PSPPH_1010	149	122	182	123	0.554991	1	0	0.0216378	1.73472e-18	deoxyribodipyrimidine photolyase
PSPPH_0258	129	138	168	153	0.378524	1	0	0.0216378	1.73472e-18	ribosome biogenesis GTP-binding protein YsxC
PSPPH_4214	404	543	475	542	0.726384	1	0	0.0216378	1.73472e-18	SsrA-binding protein
PSPPH_3806	132	166	116	131	0.354454	1	0	0.0216378	1.73472e-18	competence/damage inducible protein CinA
PSPPH_0043	14	14	12	27	0.302817	1	0	0.0216378	1.73472e-18	hypothetical protein PSPPH_0043
PSPPH_2359	28	32	16	20	0.0791709	1	0	0.0216378	1.73472e-18	hypothetical protein PSPPH_2359
PSPPH_2230	88	56	68	53	0.428224	1	0	0.0216378	1.73472e-18	nicotinamide-nucleotide adenylyltransferase
PSPPH_B0021	255	242	198	268	0.74943	1	0	0.0216378	1.73472e-18	hypothetical protein PSPPH_B0021
PSPPH_4489	132	407	126	386	0.796058	1	0	0.0216378	1.73472e-18	DNA-binding transcriptional activator OsmE
PSPPH_0724	480	386	519.5	405	0.75164	1	0	0.0216378	1.73472e-18	4-hydroxy-3-methylbut-2-enyl diphosphate reductase
PSPPH_2398	13	4	9	2	0.384226	1	0	0.0216378	1.73472e-18	hypothetical protein PSPPH_2398
PSPPH_4139	1336	1545.5	1405	1376	0.860031	1	0	0.0216378	1.73472e-18	UDP-N-acetylglucosamine 1-carboxyvinyltransferase
PSPPH_0292	856.5	844	895	742	0.857375	1	0	0.0216378	1.73472e-18	sn-glycerol-3-phosphate transporter
PSPPH_2459	7	7	4	5	0.318718	1	0	0.0216378	1.73472e-18	acetyl-CoA carboxylase, biotin carboxyl carrier protein
PSPPH_1418	217	206	214	208	0.906298	1	0	0.0216378	1.73472e-18	hypothetical protein PSPPH_1418
PSPPH_3287	215	593	237	523	0.76359	1	0	0.0216378	1.73472e-18	hypothetical protein PSPPH_3287
PSPPH_2301	61	54	61	35	0.415292	1	0	0.0216378	1.73472e-18	LysR family transcriptional regulator
PSPPH_2958	122.5	107	120	126	0.772227	1	0	0.0216378	1.73472e-18	TonB-dependent siderophore receptor
PSPPH_1695	706	612	697	569	0.845007	1	0	0.0216378	1.73472e-18	lipoprotein
PSPPH_0418	122	133	158	138	0.482572	1	0	0.0216378	1.73472e-18	FAD-binding protein
PSPPH_3814	371	280	356	296	0.925536	1	0	0.0216378	1.73472e-18	2-C-methyl-D-erythritol 2,4-cyclodiphosphate synthase
PSPPH_4293	464	438.5	535	433	0.734797	1	0	0.0216378	1.73472e-18	ABC transporter ATP-binding protein
PSPPH_1549	280	247	262	253	0.897178	1	0	0.0216378	1.73472e-18	D-isomer specific 2-hydroxyacid dehydrogenase family protein
PSPPH_2501	96	91	78.5	95	0.729181	1	0	0.0216378	1.73472e-18	cation ABC transporter ATP-binding protein
PSPPH_0958	756	747	831	764	0.769312	1	0	0.0216378	1.73472e-18	CDP-glucose-4,6-dehydratase
PSPPH_3934	16	12	13	13	0.814391	1	0	0.0216378	1.73472e-18	polysaccharide deacetylase family protein
PSPPH_1033	58	44	46	33	0.274798	1	0	0.0216378	1.73472e-18	hypothetical protein PSPPH_1033
PSPPH_0546	145	131	114	118	0.400309	1	0	0.0216378	1.73472e-18	transporter
PSPPH_2915	30	29	26	20	0.355586	1	0	0.0216378	1.73472e-18	glutamine amidotransferase, class-II protein
PSPPH_0143	38	38	48	43	0.456335	1	0	0.0216378	1.73472e-18	ADP-ribose diphosphatase NudE
PSPPH_2790	154	127	146	127	0.865585	1	0	0.0216378	1.73472e-18	prophage PSPPH05, helix-destabilizing protein
PSPPH_1327	1410	1280	1566	1191	0.900142	1	0	0.0216378	1.73472e-18	hypothetical protein PSPPH_1327
PSPPH_1000	236	154	197	155	0.613663	1	0	0.0216378	1.73472e-18	glutamate racemase
PSPPH_3217	701	441	652	414	0.734462	1	0	0.0216378	1.73472e-18	chemotaxis protein CheV
PSPPH_4252	49	34	33	36	0.530015	1	0	0.0216378	1.73472e-18	5-dehydro-4-deoxyglucarate dehydratase
PSPPH_0119	4	2	4	0	0.746668	1	0	0.0216378	1.73472e-18	ISPsy18, transposase
PSPPH_1476	76	77	87	87	0.572399	1	0	0.0216378	1.73472e-18	hypothetical protein PSPPH_1476
PSPPH_2835	22	15	14	10	0.195082	1	0	0.0216378	1.73472e-18	ABC transporter permease
PSPPH_1750	155	131	141.5	121	0.697969	1	0	0.0216378	1.73472e-18	non-ribosomal peptide synthetase
PSPPH_3305	22	51	25	36	0.497931	1	0	0.0216378	1.73472e-18	lipoprotein
PSPPH_2041	289	182	283	227	0.681391	1	0	0.0216378	1.73472e-18	ErfK/YbiS/YcfS/YnhG family protein
PSPPH_1017	471	432	495	361	0.796257	1	0	0.0216378	1.73472e-18	uracil transporter
PSPPH_3444	126	56	101	66	0.680187	1	0	0.0216378	1.73472e-18	hypothetical protein PSPPH_3444
PSPPH_2044	231	235	275	256	0.517973	1	0	0.0216378	1.73472e-18	phospho-2-dehydro-3-deoxyheptonate aldolase
PSPPH_2253	342	272	324.5	312	0.861286	1	0	0.0216378	1.73472e-18	HAD superfamily hydrolase
PSPPH_1652	440	443	362	389	0.418132	1	0	0.0216378	1.73472e-18	lipoprotein
PSPPH_4163	180	189	204	197	0.688776	1	0	0.0216378	1.73472e-18	hypothetical protein PSPPH_4163
PSPPH_0107	239	273	282	270	0.709791	1	0	0.0216378	1.73472e-18	type I restriction-modification system DNA methylase
PSPPH_0078	688	1127	566	812	0.170026	1	0	0.0216378	1.73472e-18	multidrug efflux protein NorA
PSPPH_0018	316	295	402.5	314	0.424966	1	0	0.0216378	1.73472e-18	potassium transporter peripheral membrane component
PSPPH_2238	138	178	138	164	0.834034	1	0	0.0216378	1.73472e-18	hypothetical protein PSPPH_2238
PSPPH_3654	61	50	66	59	0.662798	1	0	0.0216378	1.73472e-18	TetR family transcriptional regulator
PSPPH_1746	139.5	176	178	214	0.280692	1	0	0.0216378	1.73472e-18	aldo/keto reductase family oxidoreductase
PSPPH_5023	205.5	123	137	133	0.337345	1	0	0.0216378	1.73472e-18	hypothetical protein PSPPH_5023
PSPPH_0040	634	1527	636	1222	0.452295	1	0	0.0216378	1.73472e-18	hypothetical protein PSPPH_0040
PSPPH_1632	924	1077	1054	958	0.957021	1	0	0.0216378	1.73472e-18	ribonuclease, Rne/Rng family protein
PSPPH_0455	18	19	17	10	0.318284	1	0	0.0216378	1.73472e-18	aldolase
PSPPH_0474	49	34	63	52	0.167289	1	0	0.0216378	1.73472e-18	bifunctional pyrimidine regulatory protein PyrR uracil phosphoribosyltransferase
PSPPH_2892	143	119	102	96	0.180847	1	0	0.0216378	1.73472e-18	TonB-dependent siderophore receptor
PSPPH_0337	86	74	77	42	0.177004	1	0	0.0216378	1.73472e-18	acyl-CoA dehydrogenase family protein
PSPPH_1677	506.5	444	568	542	0.435713	1	0	0.0216378	1.73472e-18	peptidyl-prolyl cis-trans isomerase B
PSPPH_4942	140	97	112	83	0.338577	1	0	0.0216378	1.73472e-18	hypothetical protein PSPPH_4942
PSPPH_2905	73	40	73	32	0.722957	1	0	0.0216378	1.73472e-18	transcriptional regulatory protein NfxB
PSPPH_0650	1122	803.5	1360	1044	0.273066	1	0	0.0216378	1.73472e-18	autotransporting lipase
PSPPH_1382	56	65	48	59	0.60573	1	0	0.0216378	1.73472e-18	hypothetical protein PSPPH_1382
PSPPH_5130	440	573	462	467	0.665451	1	0	0.0216378	1.73472e-18	phosphoribosylaminoimidazole carboxylase, catalytic subunit
PSPPH_0790	255	166	200	133	0.250609	1	0	0.0216378	1.73472e-18	autotransporter
PSPPH_1105	56	44	54	45	0.887663	1	0	0.0216378	1.73472e-18	short chain dehydrogenase
PSPPH_2076	96	94	85	66	0.285706	1	0	0.0216378	1.73472e-18	nitrate transporter component
PSPPH_2277	37	22	28	25	0.710284	1	0	0.0216378	1.73472e-18	amino acid ABC transporter permease
PSPPH_0866	129	163	143	131	0.759875	1	0	0.0216378	1.73472e-18	pentapeptide repeat-containing protein
PSPPH_3998	157	162	164	169	0.832123	1	0	0.0216378	1.73472e-18	hypothetical protein PSPPH_3998
PSPPH_0598	529	436	516	377	0.699904	1	0	0.0216378	1.73472e-18	N-acylglucosamine 2-epimerase (GlcNAc 2-epimerase) family protein
PSPPH_2262	502	423	396	373	0.357481	1	0	0.0216378	1.73472e-18	sensory box histidine kinase
PSPPH_0369	203	231	265	292	0.211334	1	0	0.0216378	1.73472e-18	phosphoribosyl-AMP cyclohydrolase
PSPPH_0388	398	350	479	309	0.790495	1	0	0.0216378	1.73472e-18	NADP-dependent malic enzyme
PSPPH_2269	608	607	671	636	0.709976	1	0	0.0216378	1.73472e-18	transcriptional regulator
PSPPH_0522	331.5	352	337	298	0.70667	1	0	0.0216378	1.73472e-18	hypothetical protein PSPPH_0522
PSPPH_0906	272	187	285	184	0.889689	1	0	0.0216378	1.73472e-18	sensory box protein/methyl-accepting chemotaxis protein
PSPPH_1028	668	485	592	507	0.811136	1	0	0.0216378	1.73472e-18	ATP binding protein
PSPPH_1730	210	164	212	162	0.905018	1	0	0.0216378	1.73472e-18	TetR family transcriptional regulator
PSPPH_3269	283	188	270	205	0.914244	1	0	0.0216378	1.73472e-18	methyl-accepting chemotaxis protein
PSPPH_4576	8829	8936	7467.5	7766	0.483917	1	0	0.0216378	1.73472e-18	50S ribosomal protein L18
PSPPH_1894	59	34	56	42	0.816747	1	0	0.0216378	1.73472e-18	prophage PSPPH02 adenine modification methytransferase
PSPPH_B0044	15	15	15	9	0.602354	1	0	0.0216378	1.73472e-18	hypothetical protein PSPPH_B0044
PSPPH_4842	57	44	58	31	0.586632	1	0	0.0216378	1.73472e-18	MtlE
PSPPH_0365	97	97	108	122	0.433223	1	0	0.0216378	1.73472e-18	Sec-independent protein translocase TatC
PSPPH_2685	49	43	45	40	0.769012	1	0	0.0216378	1.73472e-18	polysaccharide deacetylase family protein
PSPPH_2691	136	119	111	100	0.379977	1	0	0.0216378	1.73472e-18	dienelactone hydrolase family protein
PSPPH_5135	500	431	425	341	0.331163	1	0	0.0216378	1.73472e-18	L-asparaginase I
PSPPH_3548	74.5	71	71	46	0.340803	1	0	0.0216378	1.73472e-18	hypothetical protein PSPPH_3548
PSPPH_1728	69	77	66	66	0.639988	1	0	0.0216378	1.73472e-18	TetR family transcriptional regulator
PSPPH_3191	85	90	87	98	0.812694	1	0	0.0216378	1.73472e-18	methylmalonate-semialdehyde dehydrogenase
PSPPH_1252	31	29	37	39	0.402894	1	0	0.0216378	1.73472e-18	hypothetical protein PSPPH_1252
PSPPH_0481	189.5	117	169	151	0.844318	1	0	0.0216378	1.73472e-18	type IV pilus biogenesis protein PilI
PSPPH_2364	24	22	20	19	0.613318	1	0	0.0216378	1.73472e-18	ribose ABC transporter permease
PSPPH_0247	411	331.5	392	311	0.789863	1	0	0.0216378	1.73472e-18	osmolarity sensor protein EnvZ
PSPPH_0180	479	416	545	414	0.732964	1	0	0.0216378	1.73472e-18	hypothetical protein PSPPH_0180
PSPPH_1837	326	481	326	384	0.521359	1	0	0.0216378	1.73472e-18	hypothetical protein PSPPH_1837
PSPPH_A0091	299	193	227.5	216	0.593894	1	0	0.0216378	1.73472e-18	hypothetical protein PSPPH_A0091
PSPPH_0060	232	159	254	170	0.685913	1	0	0.0216378	1.73472e-18	FKBP-type peptidyl-prolyl cis-trans isomerase
PSPPH_1700	3852.5	3911	4911	4678	0.326138	1	0	0.0216378	1.73472e-18	ATP-dependent protease La
PSPPH_3353	449	313	389	277	0.493689	1	0	0.0216378	1.73472e-18	hypothetical protein PSPPH_3353
PSPPH_3696	64	59	86	54	0.585311	1	0	0.0216378	1.73472e-18	adenosylcobinamide kinase/adenosylcobinamide-phosphate guanylyltransferase
PSPPH_4449	737	667	660	592	0.569999	1	0	0.0216378	1.73472e-18	bifunctional phosphoribosylaminoimidazolecarboxamide formyltransferase/IMP cyclohydrolase
PSPPH_2942	87	64	72	68	0.746742	1	0	0.0216378	1.73472e-18	signal transduction protein
PSPPH_4143	637	656	575	587	0.590955	1	0	0.0216378	1.73472e-18	toluene tolerance protein Ttg2C
PSPPH_0293	14	9	17	6	0.805643	1	0	0.0216378	1.73472e-18	TonB domain-containing protein
PSPPH_0349	90	92	63	63	0.0902323	1	0	0.0216378	1.73472e-18	histidine utilization repressor
PSPPH_4329	73	75	92	98	0.249439	1	0	0.0216378	1.73472e-18	hypothetical protein PSPPH_4329
PSPPH_2349	72	68	89	111	0.0939734	1	0	0.0216378	1.73472e-18	amine oxidase, flavin-containing
PSPPH_1950	171	138	174	148	0.838464	1	0	0.0216378	1.73472e-18	sensory box protein
PSPPH_1210	1435	1559	1644	1417	0.916835	1	0	0.0216378	1.73472e-18	cytochrome o ubiquinol oxidase subunit II
PSPPH_0697	38	41	43	42	0.757456	1	0	0.0216378	1.73472e-18	MutT/nudix family protein
PSPPH_0971	58	48	44	30	0.139933	1	0	0.0216378	1.73472e-18	hypothetical protein PSPPH_0971
PSPPH_4550	1534	1335	1126	994	0.137865	1	0	0.0216378	1.73472e-18	non-ribosomal peptide synthetase
PSPPH_1830	206	182	166	155	0.357193	1	0	0.0216378	1.73472e-18	transglutaminase-like domain-containing protein
PSPPH_1934	71	123	64	94	0.349654	1	0	0.0216378	1.73472e-18	NodT family outer membrane efflux lipoprotein
PSPPH_1459	150	114	144	122	0.894985	1	0	0.0216378	1.73472e-18	OMP85 family outer membrane protein
PSPPH_3412	617	467	534	352	0.30964	1	0	0.0216378	1.73472e-18	chemotaxis protein methyltransferase CheR
PSPPH_3095	66	59	46	47	0.194287	1	0	0.0216378	1.73472e-18	arginyl-tRNA-protein transferase
PSPPH_1424	497	458	541	567	0.454132	1	0	0.0216378	1.73472e-18	type III helper protein HopAK1
PSPPH_4756	111	116	118	105	0.895296	1	0	0.0216378	1.73472e-18	glutathione-independent formaldehyde dehydrogenase
PSPPH_2526	4	2.5	3	4	1	1	0	0.0216378	1.73472e-18	hypothetical protein PSPPH_2526
PSPPH_2318	95	144	101	118	0.699149	1	0	0.0216378	1.73472e-18	peptidyl-prolyl cis-trans isomerase C
PSPPH_1740	250	221	235	187	0.585098	1	0	0.0216378	1.73472e-18	deoxyribodipyrimidine photolyase-like protein
PSPPH_4381	174	141	180	128	0.886533	1	0	0.0216378	1.73472e-18	sensor histidine kinase
PSPPH_5146	2	4	3	1	0.561591	1	0	0.0216378	1.73472e-18	hypothetical protein PSPPH_5146
PSPPH_0085	89.5	144	94	96	0.326893	1	0	0.0216378	1.73472e-18	hypothetical protein PSPPH_0085
PSPPH_0023	117	90	116	83	0.861541	1	0	0.0216378	1.73472e-18	DNA processing protein DprA
PSPPH_3793	35	38	37	33	0.852599	1	0	0.0216378	1.73472e-18	acetyltransferase
PSPPH_2293	197	165	150	156	0.402179	1	0	0.0216378	1.73472e-18	nickel ABC transporter periplasmic nickel-binding protein
PSPPH_2462	28	24	17	26	0.576884	1	0	0.0216378	1.73472e-18	glutamine ABC transporter permease
PSPPH_0814	78	79	97	46	0.714229	1	0	0.0216378	1.73472e-18	HlyD family type I secretion membrane fusion protein
PSPPH_0264	67	77	98	68	0.5082	1	0	0.0216378	1.73472e-18	zinc ABC transporter ATP-binding protein
PSPPH_2116	177.5	394	197	339	0.744854	1	0	0.0216378	1.73472e-18	hypothetical protein PSPPH_2116
PSPPH_3859	73	79	55	71	0.406808	1	0	0.0216378	1.73472e-18	hypothetical protein PSPPH_3859
PSPPH_4631	75	76	77	65	0.798558	1	0	0.0216378	1.73472e-18	iron-dicitrate transporter permease subunit
PSPPH_0561	208	192	197.5	210	0.911145	1	0	0.0216378	1.73472e-18	hypothetical protein PSPPH_0561
PSPPH_4073	406	267	407.5	301	0.800241	1	0	0.0216378	1.73472e-18	hypothetical protein PSPPH_4073
PSPPH_1517	275	308	310	312	0.741721	1	0	0.0216378	1.73472e-18	hypothetical protein PSPPH_1517
PSPPH_1862	263	220	243	200	0.67571	1	0	0.0216378	1.73472e-18	7-cyano-7-deazaguanine reductase
PSPPH_5164	527.5	450	440	395	0.42632	1	0	0.0216378	1.73472e-18	SPFH domain-containing protein
PSPPH_1612	22	19	15	10	0.146451	1	0	0.0216378	1.73472e-18	hypothetical protein PSPPH_1612
PSPPH_1389	58.5	71	61	53	0.596144	1	0	0.0216378	1.73472e-18	ATP-dependent DNA ligase
PSPPH_2803	53	26	46.5	19	0.494222	1	0	0.0216378	1.73472e-18	glycosyl transferase ArnC
PSPPH_1579	154	133	173	138	0.718526	1	0	0.0216378	1.73472e-18	LysR family transcriptional regulator
PSPPH_A0077	827	842.5	903	881	0.749263	1	0	0.0216378	1.73472e-18	hypothetical protein PSPPH_A0077
PSPPH_0969	331.5	225	299.5	236	0.859645	1	0	0.0216378	1.73472e-18	dTDP-glucose 4,6-dehydratase
PSPPH_2612	81	78	81	84	0.837352	1	0	0.0216378	1.73472e-18	short chain dehydrogenase
PSPPH_0734	104	83	91	70	0.475649	1	0	0.0216378	1.73472e-18	RND family efflux transporter MFP subunit
PSPPH_3237	62	74	54.5	77	0.861967	1	0	0.0216378	1.73472e-18	hypothetical protein PSPPH_3237
PSPPH_4833	821	746	763	689	0.70193	1	0	0.0216378	1.73472e-18	Rhs family protein
PSPPH_4010	245	285	234	256	0.693744	1	0	0.0216378	1.73472e-18	EmrB/QacA family drug resistance transporter
PSPPH_2140	2644	2193	2629.5	2145	0.949233	1	0	0.0216378	1.73472e-18	phenylalanyl-tRNA synthetase subunit beta
PSPPH_4727	11	10	11	11	0.888636	1	0	0.0216378	1.73472e-18	ABC transporter permease
PSPPH_3672	159	122.5	156	107	0.754416	1	0	0.0216378	1.73472e-18	short chain dehydrogenase
PSPPH_3483	59.5	48	52	54	0.864477	1	0	0.0216378	1.73472e-18	zinc-binding dehydrogenase family oxidoreductase
PSPPH_2706	16	14	11	9	0.284023	1	0	0.0216378	1.73472e-18	hypothetical protein PSPPH_2706
PSPPH_4593	14168	18583	14576.5	17194	0.893482	1	0	0.0216378	1.73472e-18	30S ribosomal protein S10
PSPPH_2272	126	83	103	97	0.827525	1	0	0.0216378	1.73472e-18	multidrug efflux RND transporter MexF
PSPPH_3392	1206	922	1269	790	0.882026	1	0	0.0216378	1.73472e-18	flagellin
PSPPH_0861	1166	1181	1387	1124	0.747623	1	0	0.0216378	1.73472e-18	RNA polymerase-binding protein DksA
PSPPH_1805	149	123	132	122	0.767822	1	0	0.0216378	1.73472e-18	GTP cyclohydrolase I
PSPPH_4212	95	70	87	63	0.661824	1	0	0.0216378	1.73472e-18	oligoketide cyclase/lipid transport protein
PSPPH_0605	310	314	284	248	0.436427	1	0	0.0216378	1.73472e-18	O-antigen ABC transporter permease
PSPPH_3113	414	353	497	365	0.568097	1	0	0.0216378	1.73472e-18	NADH dehydrogenase I subunit F
PSPPH_1984	3289.5	3135.5	4214	3894	0.273481	1	0	0.0216378	1.73472e-18	succinyl-CoA synthetase subunit alpha
PSPPH_1765	164	137	144	115	0.463266	1	0	0.0216378	1.73472e-18	hypothetical protein PSPPH_1765
PSPPH_1255	49	43	50	36	0.805841	1	0	0.0216378	1.73472e-18	transketolase, C-terminal subunit
PSPPH_0009	402	317	391	335	0.932218	1	0	0.0216378	1.73472e-18	hdtS protein
PSPPH_5174	180	258	140	271	0.769859	1	0	0.0216378	1.73472e-18	ABC transporter permease
PSPPH_1592	24	18.5	20	22	0.858118	1	0	0.0216378	1.73472e-18	polyamine ABC transporter permease
PSPPH_3777	46	38	47	36	0.838138	1	0	0.0216378	1.73472e-18	hypothetical protein PSPPH_3777
PSPPH_2865	47	32	43	29	0.726436	1	0	0.0216378	1.73472e-18	hypothetical protein PSPPH_2865
PSPPH_4504	345	336	353	329	0.934888	1	0	0.0216378	1.73472e-18	6,7-dimethyl-8-ribityllumazine synthase
PSPPH_A0052	128	146	108	109	0.257352	1	0	0.0216378	1.73472e-18	hypothetical protein PSPPH_A0052
PSPPH_A0069	345	335	355	329	0.930187	1	0	0.0216378	1.73472e-18	stability/partitioning determinant
PSPPH_3667	3470.5	2889	3282.5	2710	0.782063	1	0	0.0216378	1.73472e-18	DNA gyrase subunit A
PSPPH_5188	42.5	46	49	25	0.480831	1	0	0.0216378	1.73472e-18	sugar ABC transporter periplasmic sugar-binding protein
PSPPH_4791	147	196	163	143	0.563418	1	0	0.0216378	1.73472e-18	hypothetical protein PSPPH_4791
PSPPH_1156	69	75	63	76	0.844354	1	0	0.0216378	1.73472e-18	DNA polymerase III subunit chi
PSPPH_0152	438	219	402	179	0.549214	1	0	0.0216378	1.73472e-18	carbon-nitrogen hydrolase family protein
PSPPH_5061	199	182	195	145	0.561517	1	0	0.0216378	1.73472e-18	poly(beta-D-mannuronate) C5 epimerase 3
PSPPH_3601	16	9	13	17	0.591154	1	0	0.0216378	1.73472e-18	PAAR domain-containing protein
PSPPH_3445	259.5	175	222	169	0.610317	1	0	0.0216378	1.73472e-18	hypothetical protein PSPPH_3445
PSPPH_2473	360	339	321	267	0.393297	1	0	0.0216378	1.73472e-18	transcriptional regulator VanR
PSPPH_1176	629	674	818	795	0.288449	1	0	0.0216378	1.73472e-18	glyceraldehyde-3-phosphate dehydrogenase, type I
PSPPH_1869	357	520	448	473	0.80765	1	0	0.0216378	1.73472e-18	transaldolase B
PSPPH_4354	391	238	384	255	0.905774	1	0	0.0216378	1.73472e-18	ATP-dependent RNA helicase rhlE
PSPPH_4487	120	130	104	97	0.295925	1	0	0.0216378	1.73472e-18	hypothetical protein PSPPH_4487
PSPPH_1185	1705	1322	1816.5	1516	0.643428	1	0	0.0216378	1.73472e-18	porin B
PSPPH_0355	192	177	178	147	0.52822	1	0	0.0216378	1.73472e-18	hypothetical protein PSPPH_0355
PSPPH_4185	1228	1120	1352	1167	0.730034	1	0	0.0216378	1.73472e-18	polynucleotide phosphorylase/polyadenylase
PSPPH_0496	1026	772	1038	570	0.583233	1	0	0.0216378	1.73472e-18	trifunctional transcriptional regulator/proline dehydrogenase/pyrroline-5-carboxylate dehydrogenase
PSPPH_1308	717	706	609	556	0.316317	1	0	0.0216378	1.73472e-18	iron-sulfur cluster assembly transcription factor IscR
PSPPH_0683	73	45	63	69	0.63431	1	0	0.0216378	1.73472e-18	hypothetical protein PSPPH_0683
PSPPH_0193	218	504	263.5	526	0.653095	1	0	0.0216378	1.73472e-18	TonB system transport protein ExbB1
PSPPH_B0039	218	210	198	225	0.907579	1	0	0.0216378	1.73472e-18	hypothetical protein PSPPH_B0039
PSPPH_3960	149	122	143	110	0.764286	1	0	0.0216378	1.73472e-18	hypothetical protein PSPPH_3960
PSPPH_3517	262	178	263	201	0.798493	1	0	0.0216378	1.73472e-18	succinylarginine dihydrolase
PSPPH_2740	96	72	94	51	0.527137	1	0	0.0216378	1.73472e-18	transmembrane protein
PSPPH_0021	305	316	471.5	386	0.108338	1	0	0.0216378	1.73472e-18	peptide deformylase
PSPPH_3532	33	30	28	27	0.623335	1	0	0.0216378	1.73472e-18	pterin-4-alpha-carbinolamine dehydratase
PSPPH_2422	38	33	40	24	0.696292	1	0	0.0216378	1.73472e-18	ThiJ/PfpI family protein
PSPPH_0581	805	781	876	767	0.857822	1	0	0.0216378	1.73472e-18	hypothetical protein PSPPH_0581
PSPPH_0267	382	296	357	227	0.452945	1	0	0.0216378	1.73472e-18	hydroperoxidase II
PSPPH_0252	284	323	290	306	0.906637	1	0	0.0216378	1.73472e-18	alginate biosynthesis transcriptional regulatory protein AlgB
PSPPH_0877	77	61	73	64	0.865876	1	0	0.0216378	1.73472e-18	sulfite oxidase subunit YedZ
PSPPH_2202	75	72	94	73	0.579136	1	0	0.0216378	1.73472e-18	hypothetical protein PSPPH_2202
PSPPH_4333	155	171	178	139	0.876879	1	0	0.0216378	1.73472e-18	large-conductance mechanosensitive channel
PSPPH_4822	532	982	603	854	0.847703	1	0	0.0216378	1.73472e-18	ArsR family transcriptional regulator
PSPPH_3891	1119	1263	1014	962	0.358452	1	0	0.0216378	1.73472e-18	bacterioferritin
PSPPH_2911	101	115	97	102	0.717972	1	0	0.0216378	1.73472e-18	luciferase family protein
PSPPH_5221	173	135	141	145	0.738745	1	0	0.0216378	1.73472e-18	hypothetical protein PSPPH_5221
PSPPH_4720	282	419	362	546	0.195195	1	0	0.0216378	1.73472e-18	8-amino-7-oxononanoate synthase
PSPPH_3419	363.5	260	316.5	208	0.379251	1	0	0.0216378	1.73472e-18	glutamine synthetase
PSPPH_3674	412	379	405.5	335	0.743421	1	0	0.0216378	1.73472e-18	hypothetical protein PSPPH_3674
PSPPH_0068	12	14	16	11	0.818261	1	0	0.0216378	1.73472e-18	hypothetical protein PSPPH_0068
PSPPH_3346	210	182	182.5	177	0.657973	1	0	0.0216378	1.73472e-18	copper-translocating P-type ATPase
PSPPH_4767	437	407	572	423	0.40635	1	0	0.0216378	1.73472e-18	betaine aldehyde dehydrogenase
PSPPH_3906	211	132	153.5	108	0.179453	1	0	0.0216378	1.73472e-18	sensor histidine kinase
PSPPH_3930	14	7	10	11	0.879213	1	0	0.0216378	1.73472e-18	hypothetical protein PSPPH_3930
PSPPH_3325	121	148	120	111	0.468813	1	0	0.0216378	1.73472e-18	RNA 2'-O-ribose methyltransferase
PSPPH_4828	116	149	145	154	0.571331	1	0	0.0216378	1.73472e-18	DNA-binding heavy metal response regulator
PSPPH_0648	197	139	174.5	158	0.894142	1	0	0.0216378	1.73472e-18	phosphoglycolate phosphatase
PSPPH_4931	15	25	23	19	0.859952	1	0	0.0216378	1.73472e-18	hypothetical protein PSPPH_4931
PSPPH_1246	120	160	103	137	0.468815	1	0	0.0216378	1.73472e-18	sugar transporter family protein
PSPPH_4250	361	313	373	283	0.889566	1	0	0.0216378	1.73472e-18	D-galactarate dehydratase
PSPPH_4470	48	34	46	26	0.626674	1	0	0.0216378	1.73472e-18	branched-chain amino acid ABC transporter permease
PSPPH_0509	1426	1807	1303	1472	0.452841	1	0	0.0216378	1.73472e-18	bifunctional glutamine-synthetase adenylyltransferase/deadenyltransferase
PSPPH_4420	1053	691	1041.5	552	0.651566	1	0	0.0216378	1.73472e-18	response regulator /diguanylate cyclase
PSPPH_2936	13	20	15	19	0.843503	1	0	0.0216378	1.73472e-18	phosphonate metabolism protein PhnG
PSPPH_3958	142	158	187	148	0.599337	1	0	0.0216378	1.73472e-18	hypothetical protein PSPPH_3958
PSPPH_2756	181	179	208	211	0.435612	1	0	0.0216378	1.73472e-18	achromobactin biosynthetic protein AcsA
PSPPH_0348	26	28	43.5	28	0.281276	1	0	0.0216378	1.73472e-18	hypothetical protein PSPPH_0348
PSPPH_4967	6	7	3	4	0.291499	1	0	0.0216378	1.73472e-18	prophage PSPPH06 head completion/stabilization protein
PSPPH_2213	378	268.5	311	180	0.168105	1	0	0.0216378	1.73472e-18	protein kinase
PSPPH_2633	100	72	114	85	0.509036	1	0	0.0216378	1.73472e-18	OmpA family protein
PSPPH_0637	216.5	205	233	185	0.912015	1	0	0.0216378	1.73472e-18	hypothetical protein PSPPH_0637
PSPPH_1784	304	191	251	155	0.330659	1	0	0.0216378	1.73472e-18	hypothetical protein PSPPH_1784
PSPPH_0825	111	118	144	154	0.197147	1	0	0.0216378	1.73472e-18	hypothetical protein PSPPH_0825
PSPPH_4014	1548	1167	1531	1094	0.870185	1	0	0.0216378	1.73472e-18	multidrug/solvent transporter
PSPPH_0933	63	49	61	54	0.851483	1	0	0.0216378	1.73472e-18	TRAP dicarboxylate transporter, DctM subunit
PSPPH_1192	88	109	89	147	0.379411	1	0	0.0216378	1.73472e-18	hypothetical protein PSPPH_1192
PSPPH_2667	393	514	412	553	0.75556	1	0	0.0216378	1.73472e-18	2-dehydro-3-deoxygluconokinase
PSPPH_3464	63	71	75.5	85	0.433632	1	0	0.0216378	1.73472e-18	LysR family transcriptional regulator
PSPPH_2640	164	184	161	140	0.471982	1	0	0.0216378	1.73472e-18	multidrug RND efflux transporter, membrane fusion protein MdtA
PSPPH_0770	314	228	282	249	0.901824	1	0	0.0216378	1.73472e-18	response regulator/sensor histidine kinase
PSPPH_2555	103	93	95	90	0.796051	1	0	0.0216378	1.73472e-18	LysR family transcriptional regulator
PSPPH_2109	236	560	302	627	0.437516	1	0	0.0216378	1.73472e-18	lipoprotein
PSPPH_2567	67	69	58	63	0.631892	1	0	0.0216378	1.73472e-18	hypothetical protein PSPPH_2567
PSPPH_2132	97	103	105	94	0.874677	1	0	0.0216378	1.73472e-18	hypothetical protein PSPPH_2132
PSPPH_0852	298	247	374	275	0.382206	1	0	0.0216378	1.73472e-18	glucose-6-phosphate isomerase
PSPPH_0480	208	223	230	217	0.852365	1	0	0.0216378	1.73472e-18	type IV pilus response regulator PilH
PSPPH_3104	163	183	275	221	0.0739166	1	0	0.0216378	1.73472e-18	adenylosuccinate lyase
PSPPH_5099	10	6	9	11	0.543857	1	0	0.0216378	1.73472e-18	NAD(P) transhydrogenase subunit alpha part 2
PSPPH_2098	191	228	169	180	0.37496	1	0	0.0216378	1.73472e-18	4-hydroxybenzoate transporter
PSPPH_3537	97	89	82	80	0.542429	1	0	0.0216378	1.73472e-18	hypothetical protein PSPPH_3537
PSPPH_3141	164	107.5	170	88	0.794145	1	0	0.0216378	1.73472e-18	polysaccharide biosynthesis domain-containing protein
PSPPH_3898	395	397	452	423	0.615887	1	0	0.0216378	1.73472e-18	glycerol uptake facilitator protein
PSPPH_4744	281	284	287	273	0.928535	1	0	0.0216378	1.73472e-18	AraC family transcriptional regulator
PSPPH_4026	220	210	226	198	0.915016	1	0	0.0216378	1.73472e-18	exonuclease I
PSPPH_4682	83	68.5	83	60	0.816897	1	0	0.0216378	1.73472e-18	lipopolysaccharide biosynthesis protein
PSPPH_0602	113	77	106	110	0.535617	1	0	0.0216378	1.73472e-18	cystathionine beta-lyase
PSPPH_0626	213	134	214	130	0.897764	1	0	0.0216378	1.73472e-18	multifunctional tRNA nucleotidyl transferase/2'3'-cyclic phosphodiesterase/2'nucleotidase/phosphatase
PSPPH_4414	184	200	142	188	0.454897	1	0	0.0216378	1.73472e-18	PAP2 superfamily protein/DedA family protein
PSPPH_2064	697.5	470	638	423	0.634685	1	0	0.0216378	1.73472e-18	cmaX protein
PSPPH_3648	3060	3260	3919	3567	0.423133	1	0	0.0216378	1.73472e-18	elongation factor P
PSPPH_0802	78	89	68	80	0.563877	1	0	0.0216378	1.73472e-18	chemotaxis protein methyltransferase CheR
PSPPH_1393	106	122	108	128	0.83426	1	0	0.0216378	1.73472e-18	repressor protein c2
PSPPH_0513	164.5	155.5	203	181	0.364016	1	0	0.0216378	1.73472e-18	lipopolysaccharide kinase RfaP
PSPPH_1813	95	67	85	65	0.738144	1	0	0.0216378	1.73472e-18	transporter
PSPPH_3389	1335	1458	1514	1120	0.777494	1	0	0.0216378	1.73472e-18	flagellar protein FliS
PSPPH_0784	26	27	16	18	0.150036	1	0	0.0216378	1.73472e-18	type III effector AvrB4-2
PSPPH_4956	5	5	2	5	0.646602	1	0	0.0216378	1.73472e-18	hypothetical protein PSPPH_4956
PSPPH_4518	87	82	150	106	0.0458013	1	0	0.0216378	1.73472e-18	OmpW family outer membrane protein
PSPPH_1960	280	360	239	331	0.564237	1	0	0.0216378	1.73472e-18	IclR family transcriptional regulator
PSPPH_0988	880	820	871.5	710	0.718098	1	0	0.0216378	1.73472e-18	GTP-dependent nucleic acid-binding protein EngD
PSPPH_3004	114	104	118	104	0.884142	1	0	0.0216378	1.73472e-18	GntR family transcriptional regulator
PSPPH_2192	29	27	29	22	0.751783	1	0	0.0216378	1.73472e-18	pirin
PSPPH_2693	93	85	88	68	0.547554	1	0	0.0216378	1.73472e-18	LysR family transcriptional regulator
PSPPH_2486	104	98	90	74	0.326222	1	0	0.0216378	1.73472e-18	acetyltransferase
PSPPH_3766	6564.5	6900	7349.5	7110	0.742719	1	0	0.0216378	1.73472e-18	peptidoglycan-associated lipoprotein
PSPPH_1133	449	344	450	370	0.861963	1	0	0.0216378	1.73472e-18	amino acid ABC transporter ATP-binding protein
PSPPH_1231	42	31	59	32	0.359727	1	0	0.0216378	1.73472e-18	hypothetical protein PSPPH_1231
PSPPH_0421	33	31	34	58	0.137843	1	0	0.0216378	1.73472e-18	4-hydroxybenzoyl-CoA thioesterase domain-containing protein
PSPPH_3870	111	105	104	91	0.616516	1	0	0.0216378	1.73472e-18	lipoprotein
PSPPH_3576	814.5	742	975	861	0.408346	1	0	0.0216378	1.73472e-18	dihydroxy-acid dehydratase
PSPPH_5019	192	171	183	192	0.86596	1	0	0.0216378	1.73472e-18	EAL domain-containing protein
PSPPH_3714	401	403	472	413	0.633051	1	0	0.0216378	1.73472e-18	hypothetical protein PSPPH_3714
PSPPH_2536	5	7	1	2	0.0275976	1	0	0.0216378	1.73472e-18	type III secretion component
PSPPH_1227	121	87	124.5	77	0.856124	1	0	0.0216378	1.73472e-18	hypothetical protein PSPPH_1227
PSPPH_3030	55	63	47	36	0.133209	1	0	0.0216378	1.73472e-18	lipoprotein
PSPPH_2195	63	62	67	82	0.441943	1	0	0.0216378	1.73472e-18	lipoprotein
PSPPH_0711	105	91	88	104	0.883186	1	0	0.0216378	1.73472e-18	LysR family transcriptional regulator
PSPPH_0075	269	247	246	298	0.803865	1	0	0.0216378	1.73472e-18	Na/Pi cotransporter family protein
PSPPH_3886	869	1644	1227	1655	0.505724	1	0	0.0216378	1.73472e-18	argininosuccinate synthase
PSPPH_4372	252	137	230	140	0.811558	1	0	0.0216378	1.73472e-18	RNA 2'-phosphotransferase
PSPPH_A0022	283	356	226	308	0.369825	1	0	0.0216378	1.73472e-18	hypothetical protein PSPPH_A0022
PSPPH_1207	1743.5	1312	1410	1057	0.294808	1	0	0.0216378	1.73472e-18	chemotaxis protein CheV
PSPPH_4789	243	253	209	213	0.421441	1	0	0.0216378	1.73472e-18	phosphopantetheine adenylyltransferase
PSPPH_1054	156	330	159	355	0.783375	1	0	0.0216378	1.73472e-18	ompA family protein
PSPPH_2356	29	33	41	44	0.206238	1	0	0.0216378	1.73472e-18	xylose isomerase
PSPPH_3913	880	743	868.5	686	0.831076	1	0	0.0216378	1.73472e-18	D-alanyl-alanine synthetase A
PSPPH_3331	33	17	20	21	0.538119	1	0	0.0216378	1.73472e-18	hypothetical protein PSPPH_3331
PSPPH_1773	77	62	75	59	0.832064	1	0	0.0216378	1.73472e-18	xanthine dehydrogenase accessory factor XdhC
PSPPH_0610	159	108	141	115	0.835337	1	0	0.0216378	1.73472e-18	hypothetical protein PSPPH_0610
PSPPH_2126	369	252	397	279	0.670934	1	0	0.0216378	1.73472e-18	ribose ABC transporter ATP-binding protein
PSPPH_4917	250.5	265	241	247	0.792953	1	0	0.0216378	1.73472e-18	M24/M37 family peptidase
PSPPH_2832	62	87	58	71	0.549273	1	0	0.0216378	1.73472e-18	IclR family transcriptional regulator
PSPPH_0553	139	126	138	123	0.882837	1	0	0.0216378	1.73472e-18	hypothetical protein PSPPH_0553
PSPPH_3055	39	38	35	45	0.829125	1	0	0.0216378	1.73472e-18	general secretion pathway protein GspN
PSPPH_1623	62	45	54	47	0.799966	1	0	0.0216378	1.73472e-18	ABC transporter ATP-binding protein
PSPPH_0910	104	91	97	100	0.883444	1	0	0.0216378	1.73472e-18	phosphodiesterase/alkaline phosphatase D
PSPPH_3021	58	45	62	62	0.432538	1	0	0.0216378	1.73472e-18	nucleoside 2-deoxyribosyltransferase
PSPPH_1873	87	88	63	84	0.413292	1	0	0.0216378	1.73472e-18	hypothetical protein PSPPH_1873
PSPPH_A0019	363	300	358	325	0.880571	1	0	0.0216378	1.73472e-18	resolvase family site-specific recombinase
PSPPH_1900	143	93	100	74	0.148833	1	0	0.0216378	1.73472e-18	GtrC
PSPPH_4403	20	17	19	13	0.681375	1	0	0.0216378	1.73472e-18	hypothetical protein PSPPH_4403
PSPPH_4994	363	273	515.5	452	0.0350856	1	0	0.0216378	1.73472e-18	levansucrase LscC
PSPPH_0300	172	121	153	131	0.850235	1	0	0.0216378	1.73472e-18	hypothetical protein PSPPH_0300
PSPPH_2051	163.5	139	147	136	0.774864	1	0	0.0216378	1.73472e-18	para-aminobenzoate synthase, component I
PSPPH_0944	337	255	277	216	0.352162	1	0	0.0216378	1.73472e-18	histidine kinase-response regulator hybrid protein
PSPPH_1828	209	179	208	179	0.893791	1	0	0.0216378	1.73472e-18	hypothetical protein PSPPH_1828
PSPPH_0323	149	99	121	83	0.355002	1	0	0.0216378	1.73472e-18	ABC transporter periplasmic substrate-binding protein
PSPPH_4117	1500.5	1602	1398	1302	0.494245	1	0	0.0216378	1.73472e-18	cell division protein MraZ
PSPPH_2474	446	377	366	297	0.272951	1	0	0.0216378	1.73472e-18	vanillate monooxygenase, oxidoreductase subunit
PSPPH_4537	205	264	182	249	0.671683	1	0	0.0216378	1.73472e-18	single-stranded DNA-binding protein
PSPPH_3702	362	266	315	242	0.550633	1	0	0.0216378	1.73472e-18	cob(I)yrinic acid a,c-diamide adenosyltransferase
PSPPH_1370	126	144	109	98	0.204033	1	0	0.0216378	1.73472e-18	xenobiotic reductase
PSPPH_5027	168	112	141	106	0.534082	1	0	0.0216378	1.73472e-18	acetyltransferase
PSPPH_4700	403	419	305	331	0.195644	1	0	0.0216378	1.73472e-18	AsnC family transcriptional regulator
PSPPH_3800	401.5	355	373	320	0.64856	1	0	0.0216378	1.73472e-18	LuxR family DNA-binding response regulator
PSPPH_0445	147	131	176	133	0.617088	1	0	0.0216378	1.73472e-18	adenosylmethionine--8-amino-7-oxononanoate transaminase
PSPPH_3822	1594	1275	1661.5	1277	0.912171	1	0	0.0216378	1.73472e-18	CTP synthetase
PSPPH_2166	43	39	38	21	0.172661	1	0	0.0216378	1.73472e-18	luciferase family protein
PSPPH_A0136	476.5	474	472	481	0.937304	1	0	0.0216378	1.73472e-18	plasmid stability protein stbB
PSPPH_A0030	7	8	6	13	0.642245	1	0	0.0216378	1.73472e-18	ISPsy16, transposase, truncated
PSPPH_2047	117	109	130	125	0.585117	1	0	0.0216378	1.73472e-18	universal stress protein family protein
PSPPH_2086	5	6	8	7	0.4786	1	0	0.0216378	1.73472e-18	chitinase class I family protein
PSPPH_3280	321	296	246	229	0.187481	1	0	0.0216378	1.73472e-18	transporter
PSPPH_4974	326	301	326	231	0.566006	1	0	0.0216378	1.73472e-18	hypothetical protein PSPPH_4974
PSPPH_2573	269	337	272	274	0.618064	1	0	0.0216378	1.73472e-18	D-alanyl-D-alanine endopeptidase
PSPPH_2436	368	276	271.5	195	0.104311	1	0	0.0216378	1.73472e-18	thiolase family protein
PSPPH_A0002	361	311	337.5	272	0.628369	1	0	0.0216378	1.73472e-18	replication protein
PSPPH_3163	134	268	134	284	0.834698	1	0	0.0216378	1.73472e-18	TonB-dependent siderophore receptor
PSPPH_4713	415	310	380	234	0.406285	1	0	0.0216378	1.73472e-18	GGDEF domain-containing protein
PSPPH_1567	412	357	407	359	0.936566	1	0	0.0216378	1.73472e-18	aspartyl-asparaginyl beta-hydroxylase
PSPPH_0705	43	53	49	39	0.765937	1	0	0.0216378	1.73472e-18	alkylphosphonate ABC transporter ATP-binding protein
PSPPH_2888	36	28	25.5	17	0.140613	1	0	0.0216378	1.73472e-18	TonB system transport protein ExbB2
PSPPH_1029	261	180	266	211	0.69736	1	0	0.0216378	1.73472e-18	hypothetical protein PSPPH_1029
PSPPH_5059	28	42	24	38	0.705756	1	0	0.0216378	1.73472e-18	hypothetical protein PSPPH_5059
PSPPH_A0001	18	17	14	13	0.457433	1	0	0.0216378	1.73472e-18	hypothetical protein PSPPH_A0001
PSPPH_2873	89	70	69	60	0.341532	1	0	0.0216378	1.73472e-18	hypothetical protein PSPPH_2873
PSPPH_0259	379	343.5	394	304	0.865463	1	0	0.0216378	1.73472e-18	DNA polymerase I
PSPPH_3942	88	92.5	95	92	0.872992	1	0	0.0216378	1.73472e-18	lipoprotein
PSPPH_2152	44.5	38	33	30	0.317611	1	0	0.0216378	1.73472e-18	hypothetical protein PSPPH_2152
PSPPH_0465	276	296	267	287	0.873865	1	0	0.0216378	1.73472e-18	homoserine O-acetyltransferase
PSPPH_0434	43	34	37	41	0.861303	1	0	0.0216378	1.73472e-18	triphosphoribosyl-dephospho-CoA synthase
PSPPH_3366	846	993.5	755	1053	0.930559	1	0	0.0216378	1.73472e-18	flagellar biosynthesis protein FlhA
PSPPH_0270	206.5	183	221	199	0.703169	1	0	0.0216378	1.73472e-18	D-methionine-binding lipoprotein MetQ
PSPPH_2910	39	39	46	43	0.569553	1	0	0.0216378	1.73472e-18	hypothetical protein PSPPH_2910
PSPPH_2829	141	90	131	94	0.864535	1	0	0.0216378	1.73472e-18	hypothetical protein PSPPH_2829
PSPPH_2353	49	44	50	35	0.704083	1	0	0.0216378	1.73472e-18	D-xylose ABC transporter permease
PSPPH_4664	136.5	109	153.5	108	0.773243	1	0	0.0216378	1.73472e-18	aromatic acid decarboxylase
PSPPH_2509	359	458	595.5	604	0.0553271	1	0	0.0216378	1.73472e-18	hypothetical protein PSPPH_2509
PSPPH_1022	259	204	240	155	0.431114	1	0	0.0216378	1.73472e-18	amino acid ABC transporter permease
PSPPH_2786	51	39	41	31	0.409807	1	0	0.0216378	1.73472e-18	ABC-transport protein, solute-binding component
PSPPH_0096	1412	1822	1448	1292	0.418951	1	0	0.0216378	1.73472e-18	succinate-semialdehyde dehydrogenase I
PSPPH_3881	813	692	766	581	0.580085	1	0	0.0216378	1.73472e-18	methyl-accepting chemotaxis protein WspA
PSPPH_1658	916.5	779	809	709	0.581871	1	0	0.0216378	1.73472e-18	acetyl-CoA carboxylase subunit beta
PSPPH_1392	28	36	16	39	0.594484	1	0	0.0216378	1.73472e-18	preprotein translocase subunit SecA
PSPPH_0208	140	142	170	153	0.511891	1	0	0.0216378	1.73472e-18	deoxyuridine 5'-triphosphate nucleotidohydrolase
PSPPH_2976	39.5	30	35	21	0.41624	1	0	0.0216378	1.73472e-18	amidase
PSPPH_0279	575	481	511	483	0.770013	1	0	0.0216378	1.73472e-18	delta-aminolevulinic acid dehydratase
PSPPH_2836	7	7	5	5	0.458342	1	0	0.0216378	1.73472e-18	hypothetical protein PSPPH_2836
PSPPH_2458	20	19	21	8	0.38184	1	0	0.0216378	1.73472e-18	urea amidolyase-like protein
PSPPH_3643	198	161	212	145	0.899913	1	0	0.0216378	1.73472e-18	LysR family transcriptional regulator
PSPPH_3937	97	72	83	57	0.406427	1	0	0.0216378	1.73472e-18	hypothetical protein PSPPH_3937
PSPPH_1917	11	21	13	21	0.843304	1	0	0.0216378	1.73472e-18	cation ABC transporter periplasmic cation-binding protein
PSPPH_0046	4	4	5	3	0.824173	1	0	0.0216378	1.73472e-18	ISPsy18, transposase
PSPPH_A0139	310	257	273.5	256	0.735567	1	0	0.0216378	1.73472e-18	stability/partitioning determinant, putative
PSPPH_2040	39	28	32	31	0.848589	1	0	0.0216378	1.73472e-18	hypothetical protein PSPPH_2040
PSPPH_1011	134	109.5	146	97	0.902855	1	0	0.0216378	1.73472e-18	MerR family transcriptional regulator
PSPPH_2504	147	173	226	193	0.183584	1	0	0.0216378	1.73472e-18	aldose 1-epimerase
PSPPH_4443	857	628	987	804	0.350882	1	0	0.0216378	1.73472e-18	acetyl-CoA carboxylase biotin carboxyl carrier protein subunit
PSPPH_2361	358	302	316	221	0.298518	1	0	0.0216378	1.73472e-18	methyl-accepting chemotaxis protein
PSPPH_4068	253	241	251	201	0.656686	1	0	0.0216378	1.73472e-18	lipoprotein
PSPPH_1711	265	235	277	243	0.851842	1	0	0.0216378	1.73472e-18	hypothetical protein PSPPH_1711
PSPPH_0217	200	220	189	191	0.635575	1	0	0.0216378	1.73472e-18	phospholipase D family protein
PSPPH_4599	25405	20065	24749	19930	0.939262	1	0	0.0216378	1.73472e-18	DNA-directed RNA polymerase subunit beta
PSPPH_3427	485	320	404	205	0.163005	1	0	0.0216378	1.73472e-18	sensor histidine kinase
PSPPH_1034	152	94	115	71	0.181068	1	0	0.0216378	1.73472e-18	hypothetical protein PSPPH_1034
PSPPH_1018	95	99	101	84	0.835404	1	0	0.0216378	1.73472e-18	uracil phosphoribosyltransferase
PSPPH_2022	79	84	71	90	0.861511	1	0	0.0216378	1.73472e-18	KDP operon transcriptional regulatory protein kdpE
PSPPH_2916	15	26	10	16	0.165452	1	0	0.0216378	1.73472e-18	glutamine synthetase, type III
PSPPH_1965	776	615	806.5	575	0.945269	1	0	0.0216378	1.73472e-18	electron transfer flavoprotein subunit alpha
PSPPH_1645	1137	702	871	634	0.316112	1	0	0.0216378	1.73472e-18	hypothetical protein PSPPH_1645
PSPPH_2578	78.5	66	74	91	0.534601	1	0	0.0216378	1.73472e-18	hypothetical protein PSPPH_2578
PSPPH_3820	1112	1023	1352	1178	0.405598	1	0	0.0216378	1.73472e-18	phosphopyruvate hydratase
PSPPH_1328	936	760	775	598	0.300324	1	0	0.0216378	1.73472e-18	carboxyphosphonoenolpyruvate phosphonomutase
PSPPH_3571	19	12	17	13	0.826998	1	0	0.0216378	1.73472e-18	hypothetical protein PSPPH_3571
PSPPH_2747	165	487	156	517	0.87243	1	0	0.0216378	1.73472e-18	ECF subfamily RNA polymerase sigma factor
PSPPH_1696	412	345.5	327	267	0.221316	1	0	0.0216378	1.73472e-18	hypothetical protein PSPPH_1696
PSPPH_1901	287	246.5	251.5	167	0.222443	1	0	0.0216378	1.73472e-18	hypothetical protein PSPPH_1901
PSPPH_3306	94	94	97.5	103	0.769442	1	0	0.0216378	1.73472e-18	cytochrome c-type biogenesis protein CycH
PSPPH_4345	156	162	207	139	0.683736	1	0	0.0216378	1.73472e-18	tRNA (uracil-5-)-methyltransferase
PSPPH_5006	277	227	299	205	0.91125	1	0	0.0216378	1.73472e-18	hypothetical protein PSPPH_5006
PSPPH_4307	460	413	515	388	0.866431	1	0	0.0216378	1.73472e-18	pyruvate phosphate dikinase PEP/pyruvate binding subunit
PSPPH_5034	6	4	10	9	0.184697	1	0	0.0216378	1.73472e-18	hypothetical protein PSPPH_5034
PSPPH_0725	130	102	155	90	0.79738	1	0	0.0216378	1.73472e-18	type IV pilus biogenesis protein
PSPPH_5067	37	18	25	31	0.883324	1	0	0.0216378	1.73472e-18	hypothetical protein PSPPH_5067
PSPPH_3421	65	61	61	59	0.82681	1	0	0.0216378	1.73472e-18	hypothetical protein PSPPH_3421
PSPPH_3815	894	369	785	322	0.510307	1	0	0.0216378	1.73472e-18	esterase
PSPPH_4289	120	173	128	171	0.877773	1	0	0.0216378	1.73472e-18	hypothetical protein PSPPH_4289
PSPPH_2443	60	46	53	45	0.750355	1	0	0.0216378	1.73472e-18	hypothetical protein PSPPH_2443
PSPPH_3278	101	74	89	63	0.495519	1	0	0.0216378	1.73472e-18	LysR family transcriptional regulator
PSPPH_3476	326	254	318	255	0.917182	1	0	0.0216378	1.73472e-18	hypothetical protein PSPPH_3476
PSPPH_1310	1047	1185	944	1048	0.574343	1	0	0.0216378	1.73472e-18	scaffold protein
PSPPH_4105	252	288	264	219	0.592044	1	0	0.0216378	1.73472e-18	cell division protein FtsQ
PSPPH_0853	79	68	94	75	0.519961	1	0	0.0216378	1.73472e-18	pantoate--beta-alanine ligase
PSPPH_4670	80	70	66	50	0.253528	1	0	0.0216378	1.73472e-18	DedA family protein
PSPPH_5060	36	46	30	30	0.21606	1	0	0.0216378	1.73472e-18	H-NS
PSPPH_3493	6	9	12	6	0.74433	1	0	0.0216378	1.73472e-18	ISPsy16, transposase
PSPPH_3609	50	40	42	27	0.280897	1	0	0.0216378	1.73472e-18	sulfonate ABC transporter permease
PSPPH_3918	68	52	58	41	0.39724	1	0	0.0216378	1.73472e-18	hypothetical protein PSPPH_3918
PSPPH_1531	674	475	614.5	381	0.469283	1	0	0.0216378	1.73472e-18	quinolinate synthetase
PSPPH_4513	51	45	50	43	0.819327	1	0	0.0216378	1.73472e-18	hypothetical protein PSPPH_4513
PSPPH_3985	126	76	109	76	0.715668	1	0	0.0216378	1.73472e-18	3-oxoacyl-
PSPPH_1560	211	152	191.5	170	0.899347	1	0	0.0216378	1.73472e-18	glutamine amidotransferase
PSPPH_0630	39	60	51	47	0.856851	1	0	0.0216378	1.73472e-18	thiosulfate sulfurtransferase
PSPPH_1467	83	131	108	159	0.281262	1	0	0.0216378	1.73472e-18	hypothetical protein PSPPH_1467
PSPPH_3729	696	997	581	1141	0.937804	1	0	0.0216378	1.73472e-18	sensor histidine kinase PhoQ
PSPPH_4847	343	413	435	419	0.543281	1	0	0.0216378	1.73472e-18	glutamine synthetase, type I
PSPPH_1435	184	260	151.5	181	0.149689	1	0	0.0216378	1.73472e-18	LysR family transcriptional regulator
PSPPH_0055	308	341	310	278	0.621436	1	0	0.0216378	1.73472e-18	homoserine/homoserine lactone efflux protein
PSPPH_3296	59	45	45	60	0.861926	1	0	0.0216378	1.73472e-18	alginate lyase
PSPPH_4810	69	60	55	50	0.366554	1	0	0.0216378	1.73472e-18	iron-sulfur cluster-binding protein
PSPPH_3299	9	4	7	4	0.711463	1	0	0.0216378	1.73472e-18	hypothetical protein PSPPH_3299
PSPPH_A0140	540	410	475	428	0.815308	1	0	0.0216378	1.73472e-18	transposase, truncated
PSPPH_3046	63	62	46	52	0.303684	1	0	0.0216378	1.73472e-18	2-pyrone-4,6-dicarboxylate lactonase
PSPPH_1473	172	195	180	196	0.880769	1	0	0.0216378	1.73472e-18	peptide deformylase
PSPPH_0408	94	86	69	100	0.803456	1	0	0.0216378	1.73472e-18	hypothetical protein PSPPH_0408
PSPPH_0751	174.5	98	179	126	0.573362	1	0	0.0216378	1.73472e-18	hypothetical protein PSPPH_0751
PSPPH_0570	1424.5	1261	1663	1319	0.610962	1	0	0.0216378	1.73472e-18	adenylosuccinate synthetase
PSPPH_2054	26	34	35	32	0.702554	1	0	0.0216378	1.73472e-18	hypothetical protein PSPPH_2054
PSPPH_4128	245	215	254	225	0.844848	1	0	0.0216378	1.73472e-18	ATPase
PSPPH_3210	882	788	805.5	756	0.742789	1	0	0.0216378	1.73472e-18	multifunctional fatty acid oxidation complex subunit alpha
PSPPH_1620	85	107	111	91	0.791848	1	0	0.0216378	1.73472e-18	hypothetical protein PSPPH_1620
PSPPH_1247	133	111	118	106	0.727067	1	0	0.0216378	1.73472e-18	nitric oxide dioxygenase
PSPPH_5073	208	206	276.5	286	0.122646	1	0	0.0216378	1.73472e-18	hypothetical protein PSPPH_5073
PSPPH_B0037	21	34	23	19	0.350656	1	0	0.0216378	1.73472e-18	hypothetical protein PSPPH_B0037
PSPPH_4096	51	72	59	68	0.859784	1	0	0.0216378	1.73472e-18	ATP:cob(I)alamin adenosyltransferase
PSPPH_1132	181	125	199	134	0.681547	1	0	0.0216378	1.73472e-18	amino acid ABC transporter permease
PSPPH_3247	295	236	290	187	0.596306	1	0	0.0216378	1.73472e-18	IclR family transcriptional regulator
PSPPH_2621	362	350	386	360	0.820168	1	0	0.0216378	1.73472e-18	esterified fatty acid cis/trans isomerase
PSPPH_3569	76	49	69	58	0.880624	1	0	0.0216378	1.73472e-18	exonuclease SbcD
PSPPH_5012	55	49	60	45	0.86003	1	0	0.0216378	1.73472e-18	nucleoside diphosphate kinase regulator
PSPPH_A0147	102	90	93	69	0.426969	1	0	0.0216378	1.73472e-18	conjugal transfer protein
PSPPH_0926	112	104	111	98	0.85583	1	0	0.0216378	1.73472e-18	transcriptional activator ChrR
PSPPH_0440	198	194	170	144	0.275385	1	0	0.0216378	1.73472e-18	malonate transporter, MadL subunit
PSPPH_4610	698.5	498	508.5	424	0.210227	1	0	0.0216378	1.73472e-18	hypothetical protein PSPPH_4610
PSPPH_1151	723	979	978	1072	0.35887	1	0	0.0216378	1.73472e-18	HU family DNA-binding protein
PSPPH_2411	20	8	11	12	0.638106	1	0	0.0216378	1.73472e-18	hypothetical protein PSPPH_2411
PSPPH_0700	83.5	67	108	87	0.2356	1	0	0.0216378	1.73472e-18	fused ISPsy20 transposase IstB/transcriptional regulator LysR family protein
PSPPH_2795	139	98	114	98	0.615769	1	0	0.0216378	1.73472e-18	hypothetical protein PSPPH_2795
PSPPH_2655	51	23	39	27	0.708651	1	0	0.0216378	1.73472e-18	acetyltransferase
PSPPH_3066	350	323	330	349	0.934316	1	0	0.0216378	1.73472e-18	TetR family transcriptional regulator
PSPPH_1974	272	275.5	271	302	0.818919	1	0	0.0216378	1.73472e-18	type II citrate synthase
PSPPH_4897	341	201	373.5	214	0.69591	1	0	0.0216378	1.73472e-18	glutamine synthetase
PSPPH_A0117	20	21	17	15	0.464969	1	0	0.0216378	1.73472e-18	ISPsy2, transposase truncated
PSPPH_2758	176	180	181	170	0.882264	1	0	0.0216378	1.73472e-18	achromobactin transport system permease CbrB
PSPPH_4001	203	162	205	164	0.908064	1	0	0.0216378	1.73472e-18	sensor histidine kinase
PSPPH_0201	226	220	216	177	0.545235	1	0	0.0216378	1.73472e-18	ribonuclease PH
PSPPH_2843	283	235	245	185	0.356364	1	0	0.0216378	1.73472e-18	hypothetical protein PSPPH_2843
PSPPH_3015	63	61	70	50	0.820159	1	0	0.0216378	1.73472e-18	phosphate transporter ATP-binding protein
PSPPH_3563	92	92	83	76	0.509218	1	0	0.0216378	1.73472e-18	MoxR-like protein
PSPPH_1125	353	247	326	218	0.62366	1	0	0.0216378	1.73472e-18	CsgG family protein
PSPPH_0516	227	220	253	273	0.412729	1	0	0.0216378	1.73472e-18	hypothetical protein PSPPH_0516
PSPPH_3923	27	40	32	29	0.754163	1	0	0.0216378	1.73472e-18	PadR family transcriptional regulator
PSPPH_0777	64	26	38	22	0.0942053	1	0	0.0216378	1.73472e-18	response regulator/sensor histidine kinase
PSPPH_4369	128	115	103	108	0.496389	1	0	0.0216378	1.73472e-18	hypothetical protein PSPPH_4369
PSPPH_4782	176	148	166	145	0.83309	1	0	0.0216378	1.73472e-18	M16 family peptidase
PSPPH_1692	115	59	82	57	0.301079	1	0	0.0216378	1.73472e-18	hypothetical protein PSPPH_1692
PSPPH_4048	29	27	19	24	0.35665	1	0	0.0216378	1.73472e-18	hypothetical protein PSPPH_4048
PSPPH_2760	95	86	76	86	0.614414	1	0	0.0216378	1.73472e-18	achromobactin transport ATP-binding protein CbrD
PSPPH_2418	15	20	17	15	0.823942	1	0	0.0216378	1.73472e-18	threonine efflux protein
PSPPH_0125	253	291	317.5	372	0.233495	1	0	0.0216378	1.73472e-18	ImcF-like family protein
PSPPH_B0024	29	27	22	22	0.393193	1	0	0.0216378	1.73472e-18	hypothetical protein PSPPH_B0024
PSPPH_1843	255	238	255	230	0.908856	1	0	0.0216378	1.73472e-18	hypothetical protein PSPPH_1843
PSPPH_3842	529	528	548	467	0.839594	1	0	0.0216378	1.73472e-18	PII uridylyl-transferase
PSPPH_A0025	162	166	190	160	0.757281	1	0	0.0216378	1.73472e-18	hypothetical protein PSPPH_A0025
PSPPH_0672	279	272	255	215	0.429557	1	0	0.0216378	1.73472e-18	anthranilate synthase component II
PSPPH_0285	72	57	77	59	0.806175	1	0	0.0216378	1.73472e-18	amino acid ABC transporter periplasmic amino acid-binding protein
PSPPH_1401	67	74	76	70	0.865533	1	0	0.0216378	1.73472e-18	hypothetical protein PSPPH_1401
PSPPH_1066	397	310	326	246	0.291847	1	0	0.0216378	1.73472e-18	sulfate transport protein CysZ
PSPPH_2563	73	81	70	66	0.568182	1	0	0.0216378	1.73472e-18	GntR family transcriptional regulator
PSPPH_5002	1116	1376	1021.5	1225	0.608893	1	0	0.0216378	1.73472e-18	hypothetical protein PSPPH_5002
PSPPH_2619	102	79	74	55	0.127097	1	0	0.0216378	1.73472e-18	sugar-binding domain-containing protein
PSPPH_3630	96	80	81	61	0.321299	1	0	0.0216378	1.73472e-18	methionine sulfoxide reductase B
PSPPH_1074	122.5	180	108	145	0.396949	1	0	0.0216378	1.73472e-18	hypothetical protein PSPPH_1074
PSPPH_2102	199	178	179	180	0.805187	1	0	0.0216378	1.73472e-18	hypothetical protein PSPPH_2102
PSPPH_0996	1133	951.5	1054.5	835	0.632342	1	0	0.0216378	1.73472e-18	glutamyl-tRNA reductase
PSPPH_0301	53	64	44	70	0.873313	1	0	0.0216378	1.73472e-18	hypothetical protein PSPPH_0301
PSPPH_3207	1746	1335.5	1732	1305	0.943931	1	0	0.0216378	1.73472e-18	DNA topoisomerase I
PSPPH_1426	490	487	501	463	0.929349	1	0	0.0216378	1.73472e-18	long-chain-fatty-acid--CoA ligase
PSPPH_1881	34	20	29	24	0.876272	1	0	0.0216378	1.73472e-18	prophage PSPPH02, late control gene D protein
PSPPH_2668	638	604	625	595	0.921715	1	0	0.0216378	1.73472e-18	UvrD/REP helicase family protein
PSPPH_0952	868	690	982	725	0.649491	1	0	0.0216378	1.73472e-18	NAD dependent epimerase/dehydratase family protein
PSPPH_3610	70	59	56	56	0.533774	1	0	0.0216378	1.73472e-18	FMNH2-dependent methanesulfonate sulfonatase
PSPPH_5127	113	120	128	155	0.339369	1	0	0.0216378	1.73472e-18	hypothetical protein PSPPH_5127
PSPPH_0533	286	266.5	299	205	0.659497	1	0	0.0216378	1.73472e-18	3-deoxy-D-manno-octulosonic-acid transferase
PSPPH_1380	2242	3410	2390	3917	0.606859	1	0	0.0216378	1.73472e-18	cold shock protein CapB
PSPPH_3860	93	65	77	56	0.449082	1	0	0.0216378	1.73472e-18	hypothetical protein PSPPH_3860
PSPPH_1885	270.5	420.5	229	319	0.243631	1	0	0.0216378	1.73472e-18	hypothetical protein PSPPH_1885
PSPPH_1354	1937	1857	2007	1845	0.942271	1	0	0.0216378	1.73472e-18	30S ribosomal protein S16
PSPPH_1520	315	310	322	385	0.538413	1	0	0.0216378	1.73472e-18	LysM domain-containing protein
PSPPH_4557	669	500	569	404	0.355323	1	0	0.0216378	1.73472e-18	major facilitator family transporter
PSPPH_0371	46.5	42.5	40	59	0.675254	1	0	0.0216378	1.73472e-18	hypothetical protein PSPPH_0371
PSPPH_3681	152	119	139	106	0.637219	1	0	0.0216378	1.73472e-18	fumarate hydratase
PSPPH_4862	58	55	62	52	0.873877	1	0	0.0216378	1.73472e-18	histidine ABC transporter permease
PSPPH_4399	641	477	741	532	0.510799	1	0	0.0216378	1.73472e-18	lipoyl synthase
PSPPH_2606	322.5	257	281	220	0.460581	1	0	0.0216378	1.73472e-18	sensory box sensor histidine kinase/response regulator
PSPPH_0454	93	93	99	92	0.878892	1	0	0.0216378	1.73472e-18	gluconate transporter family protein
PSPPH_2812	49	70	52	70	0.849469	1	0	0.0216378	1.73472e-18	PAP2 superfamily protein
PSPPH_2711	14	17	16	23	0.532291	1	0	0.0216378	1.73472e-18	deoxycytidine triphosphate deaminase
PSPPH_2514	198	314	168	256	0.350013	1	0	0.0216378	1.73472e-18	hypothetical protein PSPPH_2514
PSPPH_1451	13	12	9	12	0.703109	1	0	0.0216378	1.73472e-18	Rhs family protein
PSPPH_3257	111	133	103	117	0.614546	1	0	0.0216378	1.73472e-18	gluconate utilization system GNT-I transcriptional repressor
PSPPH_0464	118	130	144	126	0.679872	1	0	0.0216378	1.73472e-18	methionine biosynthesis protein MetW
PSPPH_4273	928	850	1182	987	0.32835	1	0	0.0216378	1.73472e-18	ornithine/DAP/arginine decarboxylase family decarboxylase 2
PSPPH_2378	25	28	20	28	0.700544	1	0	0.0216378	1.73472e-18	multidrug resistance protein
PSPPH_1932	93.5	240	90	190	0.398301	1	0	0.0216378	1.73472e-18	renal dipeptidase family protein
PSPPH_2945	167	179	154	152	0.549869	1	0	0.0216378	1.73472e-18	hypothetical protein PSPPH_2945
PSPPH_2764	828	699	698	594	0.407004	1	0	0.0216378	1.73472e-18	sensory box protein/methyl-accepting chemotaxis protein
PSPPH_0869	557	533	589	475	0.913328	1	0	0.0216378	1.73472e-18	hypothetical protein PSPPH_0869
PSPPH_2322	40	36	31	32	0.42379	1	0	0.0216378	1.73472e-18	peptide ABC transporter permease
PSPPH_2392	1663.5	1687	1651	1674	0.961785	1	0	0.0216378	1.73472e-18	S24 family peptidase
PSPPH_4625	13	4	13	13	0.324491	1	0	0.0216378	1.73472e-18	ABC transporter permease
PSPPH_4961	11	10	10	10	0.884597	1	0	0.0216378	1.73472e-18	prophage PSPPH06 lysozyme
PSPPH_1102	80	71	65	44	0.138813	1	0	0.0216378	1.73472e-18	fusaric acid resistance protein
PSPPH_4211	104	77	73	75	0.360681	1	0	0.0216378	1.73472e-18	hypothetical protein PSPPH_4211
PSPPH_1559	95	77	99	66	0.825578	1	0	0.0216378	1.73472e-18	hypothetical protein PSPPH_1559
PSPPH_0696	101	87	97	105	0.737759	1	0	0.0216378	1.73472e-18	exodeoxyribonuclease V subunit alpha
PSPPH_2969	161	130	116	115	0.266767	1	0	0.0216378	1.73472e-18	hypothetical protein PSPPH_2969
PSPPH_4019	245	240	234	259	0.910223	1	0	0.0216378	1.73472e-18	3-oxoadipate:succinyl-CoA transferase subunit A
PSPPH_4689	12	6	10	5	0.744361	1	0	0.0216378	1.73472e-18	ISPsy18, transposase, truncated
PSPPH_3733	74	70	79	65	0.87469	1	0	0.0216378	1.73472e-18	hypothetical protein PSPPH_3733
PSPPH_2887	38	32	36	27	0.706374	1	0	0.0216378	1.73472e-18	TonB system transport protein ExbD2
PSPPH_0543	209	235.5	209	201	0.684244	1	0	0.0216378	1.73472e-18	hypothetical protein PSPPH_0543
PSPPH_0961	512	373	637	472	0.257203	1	0	0.0216378	1.73472e-18	glucose-1-phosphate cytidylyltransferase
PSPPH_2285	32	27	29	29	0.839375	1	0	0.0216378	1.73472e-18	hypothetical protein PSPPH_2285
PSPPH_5168	132	138.5	162	130	0.728288	1	0	0.0216378	1.73472e-18	glucan biosynthesis protein D
PSPPH_4236	41	37	44	32	0.86452	1	0	0.0216378	1.73472e-18	peptide ABC transporter permease
PSPPH_5028	85	61	70	66	0.74258	1	0	0.0216378	1.73472e-18	haloacid dehalogenase, type II
PSPPH_1859	331	326	303	329	0.855535	1	0	0.0216378	1.73472e-18	lipoprotein releasing system transmembrane protein LolC
PSPPH_0504	255	203	231	201	0.770802	1	0	0.0216378	1.73472e-18	hypothetical protein PSPPH_0504
PSPPH_1584	87	128	92	113	0.835684	1	0	0.0216378	1.73472e-18	Cro/CI family transcriptional regulator
PSPPH_2670	44	33	44	52	0.34339	1	0	0.0216378	1.73472e-18	hypothetical protein PSPPH_2670
PSPPH_1499	256	300	321.5	401	0.188616	1	0	0.0216378	1.73472e-18	acetate permease
PSPPH_1008	77	61	65	52	0.449073	1	0	0.0216378	1.73472e-18	short chain dehydrogenase/reductase family oxidoreductase
PSPPH_2542	31	23	33	19	0.826401	1	0	0.0216378	1.73472e-18	hypothetical protein PSPPH_2542
PSPPH_1446	18	11	13	13	0.73998	1	0	0.0216378	1.73472e-18	ISPsy22, transposase truncated
PSPPH_2994	253	237	211	171	0.216001	1	0	0.0216378	1.73472e-18	AraC family transcriptional regulator
PSPPH_1001	553	539	546	510	0.870607	1	0	0.0216378	1.73472e-18	hypothetical protein PSPPH_1001
PSPPH_1547	304	266	307	215	0.659499	1	0	0.0216378	1.73472e-18	ribonuclease D
PSPPH_A0048	955	974	860	858	0.569168	1	0	0.0216378	1.73472e-18	plasmid partition protein ParA, putative
PSPPH_4456	27.5	19	19	19	0.546138	1	0	0.0216378	1.73472e-18	hypothetical protein PSPPH_4456
PSPPH_0362	80	89	50	64	0.0671471	1	0	0.0216378	1.73472e-18	methyl-accepting chemotaxis protein
PSPPH_3529	75	123	72	84	0.273831	1	0	0.0216378	1.73472e-18	hypothetical protein PSPPH_3529
PSPPH_1485	185	183	184	125	0.392813	1	0	0.0216378	1.73472e-18	major facilitator family transporter
PSPPH_2518	16	9	12	5	0.354436	1	0	0.0216378	1.73472e-18	hypothetical protein PSPPH_2518
PSPPH_0721	2523	2205	2950	2277	0.632187	1	0	0.0216378	1.73472e-18	isoleucyl-tRNA synthetase
PSPPH_4709	141	167	164	166	0.748243	1	0	0.0216378	1.73472e-18	prolyl oligopeptidase family protein
PSPPH_4175	553	593	742.5	633	0.353216	1	0	0.0216378	1.73472e-18	aspartyl/glutamyl-tRNA amidotransferase subunit B
PSPPH_4312	528	393	543	369	0.934184	1	0	0.0216378	1.73472e-18	hypothetical protein PSPPH_4312
PSPPH_2745	36	34	38	19	0.432601	1	0	0.0216378	1.73472e-18	dipeptide transporter dppD-like protein
PSPPH_1208	161	113	129	98	0.360451	1	0	0.0216378	1.73472e-18	hypothetical protein PSPPH_1208
PSPPH_2332	15	12	11	16	0.822077	1	0	0.0216378	1.73472e-18	hypothetical protein PSPPH_2332
PSPPH_4232	37	20	33	18	0.717805	1	0	0.0216378	1.73472e-18	pH-dependent sodium/proton antiporter
PSPPH_4692	62	79	75	74	0.819386	1	0	0.0216378	1.73472e-18	AraC family transcriptional regulator
PSPPH_0226	104	108	124	119	0.524784	1	0	0.0216378	1.73472e-18	DNA-binding protein
PSPPH_2603	148	120	144	116	0.85469	1	0	0.0216378	1.73472e-18	protein-glutamate methylesterase CheB
PSPPH_0709	38	20	22	19	0.217696	1	0	0.0216378	1.73472e-18	hypothetical protein PSPPH_0709
PSPPH_0106	164	132	196	203	0.137183	1	0	0.0216378	1.73472e-18	type I restriction-modification system specificity subunit
PSPPH_1182	174	122	205	151	0.351299	1	0	0.0216378	1.73472e-18	glucose ABC transporter permease
PSPPH_4762	8	6	5.5	7	0.856085	1	0	0.0216378	1.73472e-18	hypothetical protein PSPPH_4762
PSPPH_3620	126	149	135	157	0.775263	1	0	0.0216378	1.73472e-18	hypothetical protein PSPPH_3620
PSPPH_0186	36	32	35	28	0.790186	1	0	0.0216378	1.73472e-18	citrate transporter
PSPPH_2225	826	901	883	758	0.803737	1	0	0.0216378	1.73472e-18	cobaltochelatase subunit CobN
PSPPH_1462	619	559	597	543	0.885582	1	0	0.0216378	1.73472e-18	ATP-dependent RNA helicase SrmB
PSPPH_0187	37	66	47	68	0.655393	1	0	0.0216378	1.73472e-18	hypothetical protein PSPPH_0187
PSPPH_1651	305	186	311	204	0.811046	1	0	0.0216378	1.73472e-18	TetR family transcriptional regulator
PSPPH_0338	11	14	12	9	0.673873	1	0	0.0216378	1.73472e-18	hypothetical protein PSPPH_0338
PSPPH_1045	37	29	27	31	0.641346	1	0	0.0216378	1.73472e-18	alpha/beta fold family hydrolase
PSPPH_1603	56	48	51	37	0.502442	1	0	0.0216378	1.73472e-18	ribosomal large subunit pseudouridine synthase A
PSPPH_2010	74	60	75	61	0.861468	1	0	0.0216378	1.73472e-18	fimbrial protein
PSPPH_3731	515.5	1151	523	1503	0.332698	1	0	0.0216378	1.73472e-18	hypothetical protein PSPPH_3731
PSPPH_4407	560.5	444	533	477	0.942274	1	0	0.0216378	1.73472e-18	penicillin-binding protein 2
PSPPH_3182	445	550	435	469	0.627275	1	0	0.0216378	1.73472e-18	RNA polymerase-binding protein DksA
PSPPH_2820	60	28	49	30	0.667448	1	0	0.0216378	1.73472e-18	hypothetical protein PSPPH_2820
PSPPH_3788	338	340	357	359	0.775641	1	0	0.0216378	1.73472e-18	hypothetical protein PSPPH_3788
PSPPH_3594	937	781	824	788	0.752976	1	0	0.0216378	1.73472e-18	hypothetical protein PSPPH_3594
PSPPH_2811	24	11	27	12	0.766115	1	0	0.0216378	1.73472e-18	hypothetical protein PSPPH_2811
PSPPH_3044	242	139	206	122	0.460495	1	0	0.0216378	1.73472e-18	RND family efflux transporter MFP subunit
PSPPH_0246	482	385	472	340	0.750374	1	0	0.0216378	1.73472e-18	osmolarity response regulator
PSPPH_0017	12	10	9	10	0.682563	1	0	0.0216378	1.73472e-18	oxidoreductase alpha (molybdopterin) subunit, fusion
PSPPH_5203	370	379.5	341	333	0.596808	1	0	0.0216378	1.73472e-18	glucosamine--fructose-6-phosphate aminotransferase
PSPPH_2189	27.5	24	25	22	0.765822	1	0	0.0216378	1.73472e-18	choline/ethanolamine kinase
PSPPH_4475	53	47	64	45	0.764858	1	0	0.0216378	1.73472e-18	urease subunit gamma
PSPPH_4542	62	42	39	40	0.248554	1	0	0.0216378	1.73472e-18	hypothetical protein PSPPH_4542
PSPPH_4226	70	61	53	41	0.151123	1	0	0.0216378	1.73472e-18	tail tape meausure protein, truncated
PSPPH_0387	188	179	168	151	0.48618	1	0	0.0216378	1.73472e-18	nuclease-like protein
PSPPH_3592	524	442	412	384	0.33514	1	0	0.0216378	1.73472e-18	rhomboid family protein
PSPPH_3165	114	137	101	112	0.435808	1	0	0.0216378	1.73472e-18	ATP-dependent DNA ligase
PSPPH_2183	50	34	35	23	0.159427	1	0	0.0216378	1.73472e-18	general secretion pathway protein GspF
PSPPH_1364	69	51	62	58	0.881703	1	0	0.0216378	1.73472e-18	LuxR family DNA-binding response regulator
PSPPH_2822	6	2	8	2	0.665899	1	0	0.0216378	1.73472e-18	hypothetical protein PSPPH_2822
PSPPH_2457	19	17	17	14	0.679848	1	0	0.0216378	1.73472e-18	hypothetical protein PSPPH_2457
PSPPH_0580	804	692	779.5	670	0.876426	1	0	0.0216378	1.73472e-18	replicative DNA helicase
PSPPH_2895	126	97	100	88	0.424322	1	0	0.0216378	1.73472e-18	ABC transporter ATP-binding/permease
PSPPH_4249	71	296	72.5	258	0.609144	1	0	0.0216378	1.73472e-18	hypothetical protein PSPPH_4249
PSPPH_5207	9753.5	8676	9053.5	8233	0.77083	1	0	0.0216378	1.73472e-18	F0F1 ATP synthase subunit beta
PSPPH_2444	123	90	109	73	0.46373	1	0	0.0216378	1.73472e-18	LysR family transcriptional regulator
PSPPH_4508	91	84	92	79	0.867987	1	0	0.0216378	1.73472e-18	transcriptional regulator NrdR
PSPPH_0471	179	181	203	255	0.23203	1	0	0.0216378	1.73472e-18	TM2 domain-containing protein
PSPPH_1794	43	26	40	39	0.652491	1	0	0.0216378	1.73472e-18	hypothetical protein PSPPH_1794
PSPPH_3657	469	443	411	412	0.616747	1	0	0.0216378	1.73472e-18	glycosyl transferase, group 4 family protein
PSPPH_4215	30	24	28	38	0.425341	1	0	0.0216378	1.73472e-18	hypothetical protein PSPPH_4215
PSPPH_5030	79	79.5	81	70	0.814044	1	0	0.0216378	1.73472e-18	peptide ABC transporter periplasmic peptide-binding protein
PSPPH_4499	69	66	57	50	0.302387	1	0	0.0216378	1.73472e-18	urease accessory protein
PSPPH_3836	1184	1011	1113	904	0.681474	1	0	0.0216378	1.73472e-18	undecaprenyl diphosphate synthase
PSPPH_A0092	185	96	139	93	0.353438	1	0	0.0216378	1.73472e-18	hypothetical protein PSPPH_A0092
PSPPH_4648	210	169	196	167	0.847427	1	0	0.0216378	1.73472e-18	hypothetical protein PSPPH_4648
PSPPH_4964	21	19	14	19	0.50527	1	0	0.0216378	1.73472e-18	prophage PSPPH06 tail sheath protein
PSPPH_1890	7	7	4	8	0.856549	1	0	0.0216378	1.73472e-18	hypothetical protein PSPPH_1890
PSPPH_1525	442	453	555.5	642	0.142632	1	0	0.0216378	1.73472e-18	hypothetical protein PSPPH_1525
PSPPH_0981	526	492	503	559	0.831627	1	0	0.0216378	1.73472e-18	HlyD family secretion protein
PSPPH_4907	3858	2704	5069	3227	0.269644	1	0	0.0216378	1.73472e-18	OprD family outer membrane porin
PSPPH_4641	100	293.5	95	206	0.189325	1	0	0.0216378	1.73472e-18	YccA
PSPPH_0616	22	13	16	13	0.599822	1	0	0.0216378	1.73472e-18	hypothetical protein PSPPH_0616
PSPPH_B0046	184	222	192	245	0.710694	1	0	0.0216378	1.73472e-18	hypothetical protein PSPPH_B0046
PSPPH_4985	459	459.5	530	491	0.59657	1	0	0.0216378	1.73472e-18	hypothetical protein PSPPH_4985
PSPPH_0873	612	419	497	489	0.830437	1	0	0.0216378	1.73472e-18	acetolactate synthase 3 regulatory subunit
PSPPH_5080	51	47	54	42	0.855226	1	0	0.0216378	1.73472e-18	hypothetical protein PSPPH_5080
PSPPH_3301	150	139	125	103	0.257196	1	0	0.0216378	1.73472e-18	NodT family outer membrane efflux lipoprotein
PSPPH_4013	394.5	333	418	289	0.879707	1	0	0.0216378	1.73472e-18	RND family efflux transporter MFP subunit
PSPPH_3114	700	644	920	651	0.439402	1	0	0.0216378	1.73472e-18	NADH dehydrogenase subunit G
PSPPH_1720	212	176	195	178	0.852273	1	0	0.0216378	1.73472e-18	acyl-CoA dehydrogenase
PSPPH_2083	98	75	69	73	0.369852	1	0	0.0216378	1.73472e-18	sensor histidine kinase/response regulator
PSPPH_0235	646	741	632	656	0.710702	1	0	0.0216378	1.73472e-18	glycine cleavage system protein H
PSPPH_0970	68	30	51	35	0.580409	1	0	0.0216378	1.73472e-18	O-methyltransferase I
PSPPH_2557	60	42	49	25	0.184236	1	0	0.0216378	1.73472e-18	spermidine/putrescine ABC transporter permease
PSPPH_0380	21	14	22	16	0.783267	1	0	0.0216378	1.73472e-18	1-(5-phosphoribosyl)-5-
PSPPH_1831	91	115	100	113	0.854477	1	0	0.0216378	1.73472e-18	hypothetical protein PSPPH_1831
PSPPH_2556	79	63	64	59	0.538495	1	0	0.0216378	1.73472e-18	spermidine/putrescine ABC transporter ATP-binding protein
PSPPH_3524	662	511	640	523	0.938055	1	0	0.0216378	1.73472e-18	succinylglutamate desuccinylase/aspartoacylase family protein
PSPPH_4049	71	71	71	57	0.653372	1	0	0.0216378	1.73472e-18	cardiolipin synthase
PSPPH_0390	116	112	117	115	0.882249	1	0	0.0216378	1.73472e-18	type IV pilus biogenesis protein PilM
PSPPH_1085	224	187	187	193	0.688537	1	0	0.0216378	1.73472e-18	PsiE family protein
PSPPH_0265	56	50	59	63	0.533402	1	0	0.0216378	1.73472e-18	zinc ABC transporter permease
PSPPH_1931	78	133	70	109	0.44336	1	0	0.0216378	1.73472e-18	aminotransferase, class V
PSPPH_4065	173	185.5	176	169	0.851796	1	0	0.0216378	1.73472e-18	GGDEF domain/EAL domain-containing protein
PSPPH_A0076	279	355	315	346	0.838393	1	0	0.0216378	1.73472e-18	resolvase, truncated
PSPPH_1602	3	3	3	0	0.5187	1	0	0.0216378	1.73472e-18	ISPsy19, transposase
PSPPH_0185	14	11	23	7	0.649553	1	0	0.0216378	1.73472e-18	magnesium chelatase subunit D/I family protein
PSPPH_A0146	25	30	25	17	0.350687	1	0	0.0216378	1.73472e-18	conjugal transfer protein
PSPPH_1321	1697.5	1193	1568	1217	0.859365	1	0	0.0216378	1.73472e-18	histidyl-tRNA synthetase
PSPPH_0658	44	48	82	53	0.0811739	1	0	0.0216378	1.73472e-18	hypothetical protein PSPPH_0658
PSPPH_2292	101	52	75	62	0.625988	1	0	0.0216378	1.73472e-18	nickel ABC transporter permease
PSPPH_3893	343	245	297.5	259	0.787432	1	0	0.0216378	1.73472e-18	molybdopterin-binding oxidoreductase
PSPPH_4632	62.5	46	51	48	0.706829	1	0	0.0216378	1.73472e-18	iron(III) dicitrate transport system, permease FecD
PSPPH_4755	35	29	41	36	0.460075	1	0	0.0216378	1.73472e-18	formyltetrahydrofolate deformylase
PSPPH_3484	39.5	35	34	33	0.727893	1	0	0.0216378	1.73472e-18	short chain dehydrogenase
PSPPH_2007	57	62.5	65	50	0.830722	1	0	0.0216378	1.73472e-18	hypothetical protein PSPPH_2007
PSPPH_1497	123	102	112	96	0.691989	1	0	0.0216378	1.73472e-18	amino acid ABC transporter permease
PSPPH_1736	125	169	102	147	0.435162	1	0	0.0216378	1.73472e-18	TonB-dependent siderophore receptor
PSPPH_0140	139	225	135	153	0.246709	1	0	0.0216378	1.73472e-18	formate dehydrogenase family accessory protein FdhD
PSPPH_5165	336	275	266	241	0.349637	1	0	0.0216378	1.73472e-18	SPFH domain-containing protein
PSPPH_5066	327	230	284	236	0.753833	1	0	0.0216378	1.73472e-18	ADP-ribosylglycohydrolase family protein
PSPPH_2538	64	48	50	46	0.522638	1	0	0.0216378	1.73472e-18	type III secretion component
PSPPH_A0103	464	641	459	545	0.641622	1	0	0.0216378	1.73472e-18	addiction module antitoxin
PSPPH_4592	15913.5	14659	13796.5	13110	0.570874	1	0	0.0216378	1.73472e-18	50S ribosomal protein L3
PSPPH_3890	579	1224.5	649	1743	0.164083	1	0	0.0216378	1.73472e-18	bacterioferritin-associated ferredoxin
PSPPH_3236	37	19	30	29	0.838262	1	0	0.0216378	1.73472e-18	hypothetical protein PSPPH_3236
PSPPH_B0053	157	155	155	168	0.864013	1	0	0.0216378	1.73472e-18	hypothetical protein PSPPH_B0053
PSPPH_0560	412	380	344.5	334	0.43619	1	0	0.0216378	1.73472e-18	YjeF family protein
PSPPH_0039	48	76	43	61	0.436178	1	0	0.0216378	1.73472e-18	hypothetical protein PSPPH_0039
PSPPH_0860	102	84	85.5	87	0.736634	1	0	0.0216378	1.73472e-18	glutamyl-Q tRNA(Asp) synthetase
[truncated: 3,046 more rows]

## Sheet: Pla107
Query locus tag	median_2:EV norm	median_3:EV norm	median_4:HrpL norm	median_1:HrpL norm	median_P-val	median_Q-val	b_value	b_value_UL	b_value_LL	Query annotation
Lac107_00016360	10	6	2744.5	2883	1.57556e-52	1.01813e-48	1	1	0.978362	RNA polymerase sigma factor, sigma-70 family
Lac107_00043940	37	26	5262	3753	6.19467e-43	1.1163e-39	1	1	0.978362	hypothetical protein
Lac107_00057890	9.5	13	863	1139	7.43382e-43	1.23894e-39	1	1	0.978362	YopJ Serine/Threonine acetyltransferase.
Lac107_00016390	13	22	1276.5	1932	1.52685e-42	2.31519e-39	1	1	0.978362	Tir chaperone protein (CesT).
Lac107_00028620	28	42	4168	6232	1.65091e-42	2.45825e-39	1	1	0.978362	Protein of unknown function (DUF1826).
Lac107_00066040	14	25	1199	2067	1.80124e-41	1.67415e-38	1	1	0.978362	hypothetical protein
Lac107_00066440	44	68	11415.5	13594	2.14624e-41	1.96907e-38	1	1	0.978362	cysteine protease domain, YopT-type
Lac107_00016060	10	10	593	926	3.37659e-41	2.88346e-38	1	1	0.978362	Tir chaperone protein (CesT).
Lac107_00025100	41	42	4533.5	5294	1.37469e-40	9.56742e-38	1	1	0.978362	Acetylornithine deacetylase/Succinyl-diaminopimelate desuccinylase and related deacylases
Lac107_00066030	30	53	3503	5690	2.48571e-40	1.55431e-37	1	1	0.978362	N-Dimethylarginine dimethylaminohydrolase
Lac107_00016190	20	15	1365	909	1.32936e-39	6.62599e-37	1	1	0.978362	HrpF protein.
Lac107_00066050	31	35	2384.5	3099	1.51381e-39	8.38908e-37	1	1	0.978362	hypothetical protein
Lac107_00016050	5	5	349	463	1.69836e-39	9.53228e-37	1	1	0.978362	hypothetical protein
Lac107_00043950	29	46	2730	3714	2.54007e-39	1.29217e-36	1	1	0.978362	Salmonella virulence-associated 28kDa protein.
Lac107_00039830	26	34	1597	2464	1.51463e-38	6.40162e-36	1	1	0.978362	AvrPtoB E3 ubiquitin ligase.
Lac107_00016070	34	38	1644	3251	6.7523e-38	2.6014e-35	1	1	0.978362	hypothetical protein
Lac107_00016100	15	15	802	817	8.8763e-38	3.57201e-35	1	1	0.978362	Predicted soluble lytic transglycosylase fused to an ABC-type amino acid-binding protein
Lac107_00058410	31	32	1812	1939	1.81844e-37	6.61857e-35	1	1	0.978362	cysteine protease domain, YopT-type
Lac107_00016200	8	16	443	717	4.7334e-37	1.70065e-34	1	1	0.978362	hypothetical protein
Lac107_00016380	59	82	4863	7577	2.79967e-36	9.07471e-34	1	1	0.978362	hypothetical protein
Lac107_00066600	36	39	1501	2220	1.7386e-35	5.17319e-33	1	1	0.978362	YopJ Serine/Threonine acetyltransferase.
Lac107_00043960	25	36	1124	1610	3.55699e-35	1.02055e-32	1	1	0.978362	Chemotaxis response regulator containing a CheY-like receiver domain and a methylesterase domain
Lac107_00016150	34.5	57	1838	2943	4.79182e-35	1.32567e-32	1	1	0.978362	type III secretion apparatus protein, YscI/HrpB, C-terminal domain
Lac107_00016170	10	12	400	475	3.0733e-34	8.29844e-32	1	1	0.978362	hypothetical protein
Lac107_00016160	38	44	1485	2022	6.27916e-34	1.59617e-31	1	1	0.978362	type III secretion apparatus lipoprotein, YscJ/HrcJ family
Lac107_00016030	69	104	4351.5	6501	1.8155e-33	4.45201e-31	1	1	0.978362	hypothetical protein
Lac107_00053020	110	158.5	13143.5	11403	3.66832e-33	8.80113e-31	1	1	0.978362	Central core of the bacterial effector protein AvrPto.
Lac107_00029020	79	130	7389	6573	6.99405e-33	1.64193e-30	1	1	0.978362	hypothetical protein
Lac107_00016210	69.5	92	2519	3858	9.66909e-31	2.10098e-28	1	1	0.978362	type III secretion outer membrane pore, YscC/HrcC family
Lac107_00016230	35	38	922	981	1.01896e-29	1.98881e-27	1	1	0.978362	hypothetical protein
Lac107_00016040	8	8	198	294	1.36884e-29	2.82614e-27	1	1	0.978362	Pectate lyase.
Lac107_00053690	97	175	6757	5344	2.3978e-29	4.77116e-27	1	1	0.978362	Pseudomonas avirulence D protein (AvrD).
Lac107_00016130	157	308.5	15687.5	17372	2.6118e-29	4.88619e-27	1	1	0.978362	HrpA pilus formation protein.
Lac107_00058290	83	94.5	2446.5	3491	4.04668e-29	7.59779e-27	1	1	0.978362	Threonine dehydrogenase and related Zn-dependent dehydrogenases
Lac107_00016180	6	9	222	216	6.49467e-29	1.17675e-26	1	1	0.978362	type III secretion apparatus protein, HrpE/YscL family
Lac107_00016330	13	12	246	347	1.18017e-28	2.1275e-26	1	1	0.978362	type III secretion apparatus protein, YscD/HrpQ family
Lac107_00016280	1	2	121	107	1.69158e-28	2.93198e-26	1	1	0.978362	Flagellar motor switch/type III secretory pathway protein
Lac107_00016140	200	326	12530.5	20543	3.58558e-28	5.93e-26	1	1	0.978362	HrpZ.
Lac107_00016220	6	10	200	231	4.72668e-28	7.61951e-26	1	1	0.978362	hypothetical protein
Lac107_00016370	39	47	793	1164	5.32966e-28	8.65489e-26	1	1	0.978362	hypothetical protein
Lac107_00016320	19	16	306	455	6.65081e-28	1.09804e-25	1	1	0.978362	ATPase FliI/YscN family
Lac107_00058400	21	26	466	504	7.14827e-28	1.14028e-25	1	1	0.978362	hypothetical protein
Lac107_00016350	12	7	189	266	1.58351e-27	2.43522e-25	1	1	0.978362	type III secretion regulator YopN/LcrE/InvE/MxiC
Lac107_00058300	16	25	348	498	1.87031e-27	2.91163e-25	1	1	0.978362	Pyrimidine reductase, riboflavin biosynthesis
Lac107_00016310	4	3	123	134	1.16067e-26	1.72442e-24	1	1	0.978362	Type III secretion protein YscO.
Lac107_00016240	15	11	266	261	2.98152e-26	4.25844e-24	1	1	0.978362	type III secretion protein, YscU/HrpY family
Lac107_00058310	9	11	174	245	4.40169e-26	6.16394e-24	1	1	0.978362	haloacid dehalogenase superfamily, subfamily IA, variant 3 with third motif having DD or ED/haloacid dehalogenase superfamily, subfamily IA, variant 1 with third motif having Dx(3-4)D or Dx(3-4)E
Lac107_00043500	22	29	391	487	2.2467e-25	3.05645e-23	1	1	0.978362	DnaJ-class molecular chaperone with C-terminal Zn finger domain
Lac107_00058320	4	10	134	183	6.78017e-25	9.14579e-23	1	1	0.978362	Uncharacterized conserved protein
Lac107_00053590	317	342	6157	8994	1.31815e-21	1.66356e-19	1	1	0.978362	hypothetical protein
Lac107_00016080	7	3	95	112	1.96429e-21	2.48356e-19	1	1	0.978362	DspF/AvrF protein.
Lac107_00053090	813	647	26269	24715	3.04368e-21	3.77283e-19	1	1	0.978362	hypothetical protein
Lac107_00016340	33	41	432	451	3.72019e-21	4.52644e-19	1	1	0.978362	type III secretion protein, HrcV family
Lac107_00061530	40	37	369	509	1.52869e-20	1.80203e-18	1	1	0.978362	Response regulator containing a CheY-like receiver domain and an HTH DNA-binding domain
Lac107_00066020	49	65	636	496	9.0281e-19	1.02503e-16	1	1	0.978362	Arabinose efflux permease
Lac107_00048300	12	13	145	137	9.54659e-19	1.08529e-16	1	1	0.978362	Predicted amidohydrolase
Lac107_00016300	4	4	59	87	2.20313e-18	2.4842e-16	1	1	0.978362	hypothetical protein
Lac107_00016290	3	5	62	82	6.88859e-18	7.73841e-16	1	1	0.978362	hypothetical protein
Lac107_00053540-scaffold00089_68570	7	7	76	104	3.87207e-17	4.18397e-15	1	1	0.978362	Site-specific recombinases, DNA invertase Pin homologs
Lac107_00025090	49	30	239	346	1.67743e-15	1.75142e-13	1	1	0.978362	N-acetylglutamate synthase and related acetyltransferases
Lac107_00019220	30	38	328.5	158	5.51865e-15	5.70857e-13	1	1	0.978362	hypothetical protein
Lac107_00029380	30	25	197	200	6.69803e-15	6.84638e-13	1	1	0.978362	Membrane-associated lipoprotein involved in thiamine biosynthesis
Lac107_00019230	199	244	1701	1888	1.96074e-14	1.95274e-12	1	1	0.978362	Membrane protein TerC, possibly involved in tellurium resistance
Lac107_00016270	5	5	57	64	2.13847e-14	2.1429e-12	1	1	0.978362	type III secretion apparatus protein, YscR/HrcR family
Lac107_00029030	41	48	237	353	2.50046e-14	2.5244e-12	1	1	0.978362	hypothetical protein
Lac107_00028600	35	26	163	245	3.10424e-14	3.11024e-12	1	1	0.978362	Acetyltransferases
Lac107_00016090	41	46	273	292	4.54954e-14	4.48538e-12	1	1	0.978362	Pathogenicity factor.
Lac107_00053710	99	121	672	796	1.04192e-13	1.02013e-11	1	1	0.978362	hypothetical protein
Lac107_00058330	54	48	253	336	1.06166e-12	9.94267e-11	1	1	0.978362	Fucose permease
Lac107_00025060	17.5	9	86	81	2.02403e-11	1.86847e-09	1	1	0.978362	Phosphopantetheinyl transferase
Lac107_00016260	1	2	27	28	1.39205e-10	1.24936e-08	1	1	0.978362	type III secretion protein, HrpO family
Lac107_00016250	3	5	48	27	1.57266e-10	1.42169e-08	1	1	0.978362	type III secretion protein SpaR/YscT/HrcT
Lac107_00025070	78	50	288	277	6.21027e-10	5.37414e-08	1	1	0.978362	non-ribosomal peptide synthetase terminal domain of unknown function
Lac107_00052740	48	123	11	25	1.80999e-09	1.54975e-07	1	1	0.978362	hypothetical protein
Lac107_00061520	53	65	226	264	2.49813e-09	2.11179e-07	1	1	0.978362	PAS domain S-box
Lac107_00053680	282	273	1385	1216	2.6708e-09	2.2866e-07	1	1	0.978362	Fructose-2,6-bisphosphatase
Lac107_00028590	47	49	170	226	2.79634e-09	2.34674e-07	1	1	0.978362	Uncharacterized protein conserved in bacteria
Lac107_00039820	50	50	164	250	2.96756e-09	2.53984e-07	1	1	0.978362	Transcriptional regulator
Lac107_00061540	27	25	126	97	5.26038e-09	4.38296e-07	1	1	0.978362	Signal transduction histidine kinase
Lac107_00068010	13	6	51	50	1.14533e-08	9.42987e-07	1	1	0.978362	hypothetical protein
Lac107_00053670	366	310	1409	1488	2.29205e-08	1.85287e-06	1	1	0.978362	Probable taurine catabolism dioxygenase
Lac107_00018930	71	140	29	31	2.87028e-07	2.18575e-05	1	1	0.978362	NAD-dependent aldehyde dehydrogenases
Lac107_00026580	149	360	60	93	3.28351e-07	2.48977e-05	1	1	0.978362	FOG: CBS domain
Lac107_00049980	6	6	22	44	4.94823e-07	3.71807e-05	1	1	0.978362	hypothetical protein
Lac107_00066350	1	3	23	17	5.12902e-07	3.82058e-05	1	1	0.978362	Phosphopantetheine attachment site.
Lac107_00003310	62	201	22	57	5.40465e-07	4.02434e-05	1	1	0.978362	hypothetical protein
Lac107_00066360	11	9	46	44	6.30101e-07	4.70713e-05	1	1	0.978362	Condensation domain.
Lac107_00050810	77	143	28	38	6.61465e-07	4.91179e-05	1	1	0.978362	Catalase
Lac107_00011190	19	20	63	79	7.15914e-07	5.3487e-05	1	1	0.978362	Uncharacterized conserved protein
Lac107_00067990	28	30	80	115	7.93723e-07	5.79507e-05	1	1	0.978362	Transposase and inactivated derivatives, IS5 family
Lac107_00053660	386	323	1168	1205	2.08121e-06	0.000147314	1	1	0.978362	hypothetical protein
Lac107_00039810	50	56	140	181	2.80424e-06	0.000193021	1	1	0.978362	NADH:flavin oxidoreductases, Old Yellow Enzyme family
Lac107_00047910	73	67.5	23	20	3.65433e-06	0.000253952	1	1	0.978362	hypothetical protein
Lac107_00039940	93	107	33	32	3.91317e-06	0.000263927	1	1	0.978362	hypothetical protein
Lac107_00033300	43	101	14	31	4.66792e-06	0.000320166	1	1	0.978362	peroxiredoxin, Ohr subfamily
Lac107_00025050	16	8	51.5	39	5.14e-06	0.000348991	1	1	0.978362	AraC-type DNA-binding domain-containing proteins
Lac107_00031260	209	222	50	102	7.31095e-06	0.000486837	1	1	0.978362	4-hydroxybenzoate 3-monooxygenase
Lac107_00027470	44	48	121	143	1.07007e-05	0.000693646	1	1	0.978362	The (Largely Gram-negative Bacterial) Hydrophobe/Amphiphile Efflux-1 (HAE1) Family
Lac107_00027460	26	23	73	70	2.21297e-05	0.00142195	1	1	0.978362	RND family efflux transporter, MFP subunit
Lac107_00018840	39	43	116	110	2.24711e-05	0.00142374	1	1	0.978362	Bacteriophytochrome (light-regulated signal transduction histidine kinase)
Lac107_00025300	118	415.5	61	138	2.52984e-05	0.00161268	1	1	0.978362	Acyl-CoA dehydrogenases
Lac107_00015550	58	50	134	155	2.86855e-05	0.00181317	1	1	0.978362	Pectate lyase
Lac107_00021260	20	17.5	52	60	3.12934e-05	0.00194772	1	1	0.978362	Sugar phosphate permease
Lac107_00059310	63	241	20	95	3.25327e-05	0.00201171	1	1	0.978362	type VI secretion protein, VC_A0107 family
Lac107_00029040	40	57	119	137	3.71944e-05	0.00232718	1	1	0.978362	Predicted divalent heavy-metal cations transporter
Lac107_00003300	119	382	44	148	4.08711e-05	0.00248698	1	1	0.978362	hypothetical protein
Lac107_00054590	68	63	167	172	4.77545e-05	0.00289442	1	1	0.978362	Transcriptional regulators
Lac107_00059130	85	126	268	271	5.46511e-05	0.00323557	1	1	0.978362	Rhs element Vgr protein
Lac107_00053100	592	676	1817	1804	6.05652e-05	0.00359777	1	1	0.978362	Site-specific recombinases, DNA invertase Pin homologs
Lac107_00066420	12	12	37	41	6.87335e-05	0.00401534	0.956667	0.978323	0.915247	Predicted dinucleotide-binding enzymes
Lac107_00041890	775	1832	322	632	7.91739e-05	0.00460037	1	1	0.978362	catalase/peroxidase HPI
Lac107_00025080	22	17	47	62	8.71861e-05	0.00503652	0.963333	0.982715	0.9239	Acyl-CoA synthetases (AMP-forming)/AMP-acid ligases II
Lac107_00035930	123	107	51	41	9.8679e-05	0.00564674	0.99	0.99747	0.961325	Bacterial nucleoid DNA-binding protein
Lac107_00059320	109	272	48	108	0.000115802	0.00642883	1	1	0.978362	hypothetical protein
Lac107_00057860	245	311	119	109	0.000126082	0.00697173	1	1	0.978362	Methyl-accepting chemotaxis protein
Lac107_00052750	112	238	47	98	0.000143491	0.00781738	0.993333	0.998697	0.96662	Acyl-CoA thioesterase
Lac107_00002730	185	509	117	169	0.000150098	0.00828777	1	1	0.978362	hypothetical protein
Lac107_00011000	214	588	164	167	0.000167261	0.00918816	1	1	0.978362	Peroxiredoxin
Lac107_00005080	594	1748.5	289	630	0.000212969	0.0112587	1	1	0.978362	hypothetical protein
Lac107_00056370	25	26	63	68	0.000234121	0.0121322	0.923333	0.954368	0.873979	prepilin-type N-terminal cleavage/methylation domain
Lac107_00040990	29	30	61	87	0.000273349	0.0138245	0.913333	0.94673	0.862049	Thioesterase domains of type I polyketide synthases or non-ribosomal peptide synthetases
Lac107_00005140	191	437	98	174	0.000306553	0.0156146	0.993333	0.998697	0.96662	hypothetical protein
Lac107_00056380	87	69	180	178	0.000315702	0.0158248	0.946667	0.971438	0.902565	glycine oxidase ThiO
Lac107_00032300	128.5	152	65	56	0.0003444	0.0173651	0.923333	0.954368	0.873979	PAS domain S-box
Lac107_00003290	171	487	91	195	0.000354046	0.0176068	0.993333	0.998697	0.96662	hypothetical protein
Lac107_00053650	529	562.5	1286	1427	0.000366791	0.0180255	1	1	0.978362	Adenosylmethionine-8-amino-7-oxononanoate aminotransferase
Lac107_00029920	23	25	63	56	0.000375039	0.0184955	0.823333	0.872873	0.759801	Response regulator containing CheY-like receiver, AAA-type ATPase, and DNA-binding domains
Lac107_00052090	549	1372.5	273	529	0.000440739	0.0211726	1	1	0.978362	thioredoxin-disulfide reductase
Lac107_00002710	391	1288	218	490	0.000443417	0.0211807	1	1	0.978362	hypothetical protein
Lac107_00061010	91	130	32	65	0.000473272	0.0224354	0.846667	0.892694	0.785637	ABC-type sugar transport system, ATPase component
Lac107_00040640	242	307	80	164	0.000472673	0.0225573	0.953333	0.976064	0.910984	acetyl-CoA acetyltransferases
Lac107_00000090	77	48	161	120	0.000513416	0.024011	0.833333	0.881413	0.770828	CRISPR-associated protein (Cas_Csy3).
Lac107_00058700	40	31	11	15	0.000566694	0.0264187	0.716667	0.778429	0.645528	hypothetical protein
Lac107_00063830	107	126	50	54	0.000591948	0.0274578	0.78	0.835177	0.712706	Outer membrane protein and related peptidoglycan-associated (lipo)proteins
Lac107_00061020	104	181	47	81	0.000602068	0.027702	0.813333	0.864269	0.748838	ABC-type sugar transport system, periplasmic component
Lac107_00047560	168	160	88	61	0.000631281	0.0291991	0.786667	0.841043	0.719885	RND family efflux transporter, MFP subunit
Lac107_00040980	29	31	60	78	0.00069713	0.0315418	0.67	0.735587	0.597057	non-ribosomal peptide synthase domain TIGR01720
Lac107_00055050	43	60	22	21	0.000717469	0.0320121	0.686667	0.750978	0.614277	CsbD-like.
Lac107_00026350	260	338	115	158	0.000727023	0.0324894	0.823333	0.872873	0.759801	ABC-type sugar transport system, periplasmic component
Lac107_00006900	574	202	1170	597	0.000831465	0.0365735	0.793333	0.846885	0.727087	FtsK/SpoIIIE family.
Lac107_00059670	107	183	56	78	0.00086131	0.0376181	0.673333	0.738673	0.600493	Small protein A (tmRNA-binding)
Lac107_00021720	92	304.5	66	118	0.000884869	0.0381927	0.693333	0.757107	0.621193	Transcriptional regulator
Lac107_00021690	55	99	35	34	0.00093311	0.0399271	0.63	0.698262	0.556112	Site-specific recombinase XerD
Lac107_00005750	208	81	437	182	0.00100935	0.0419631	0.62	0.68885	0.545957	Tfp pilus assembly protein, pilus retraction ATPase PilT
Lac107_00038810	246	393	121	176	0.00100721	0.0432132	0.643333	0.710762	0.569702	Uncharacterized protein conserved in bacteria
Lac107_00056010	16	29	7	8	0.00101629	0.0433489	0.53	0.60277	0.455932	hypothetical protein
Lac107_00052020	55	95	34	33	0.00104539	0.043778	0.573333	0.644517	0.498976	hypothetical protein
Lac107_00030980	68	125.5	31	58	0.00109649	0.0454551	0.543333	0.615674	0.469118	Catalase
Lac107_00004370	105	294	60	128	0.00111699	0.0465033	0.556667	0.628526	0.482355	hypothetical protein
Lac107_00010660	88	263	57	108	0.0011485	0.0471146	0.56	0.631731	0.485673	Amidases related to nicotinamidase
Lac107_00031700	328	361.5	166	159	0.00116249	0.0482284	0.536667	0.609228	0.462518	hypothetical protein
Lac107_00042130	25	44	10	17	0.00121572	0.0490566	0.503333	0.576809	0.429714	hypothetical protein
Lac107_00061840	14	20	1	9	0.00123069	0.0499212	0.503333	0.576809	0.429714	formyltetrahydrofolate deformylase
Lac107_00011150	55	102	36	36	0.00125554	0.0504628	0.496667	0.570286	0.423191	Adenosylmethionine-8-amino-7-oxononanoate aminotransferase
Lac107_00017430	37	70	17	30	0.00125517	0.0506912	0.493333	0.56702	0.419935	hypothetical protein
Lac107_00005840	166	71	328	168	0.0013379	0.0535138	0.443333	0.517645	0.371474	hypothetical protein
Lac107_00064730	40	54	20	20	0.00139421	0.0561498	0.47	0.544068	0.39723	hypothetical protein
Lac107_00029280	45.5	23	106	42	0.00149367	0.057231	0.45	0.52427	0.377894
Lac107_00065160	134	306	71	141	0.00147274	0.0584545	0.37	0.443888	0.301738	Integrase
Lac107_00003320	77	113	45	45	0.00154531	0.0596184	0.4	0.474259	0.330068	hypothetical protein
Lac107_00011180	14	20	43	38	0.00167277	0.0617225	0.44	0.514327	0.368269	Transcriptional regulator
Lac107_00031290	55.5	115	28	52	0.00168018	0.0643905	0.353333	0.426892	0.286122	SH3 domain protein
Lac107_00002700	148.5	403	78	190	0.00177443	0.0661904	0.21	0.276517	0.156033	hypothetical protein
Lac107_00053640	330	319	733	646	0.00179112	0.0669826	0.163333	0.225481	0.115755	hypothetical protein
Lac107_00016640	361	690	202	298	0.00183094	0.0681519	0.13	0.188119	0.0878928	iron-sulfur cluster assembly transcription factor IscR
Lac107_00005160	82	243	51	108	0.00187266	0.0695432	0.246667	0.315794	0.188502	hypothetical protein
Lac107_00015790	44	48	95	95	0.00194903	0.0710537	0.343333	0.416651	0.276796	Coenzyme F390 synthetase
Lac107_00006650	154	42	304	95	0.0021001	0.0755388	0.216667	0.283707	0.161888	hypothetical protein
Lac107_00053630	183	209	412	394	0.0020773	0.0758214	0.17	0.232855	0.121426	hypothetical protein
Lac107_00025820	116	132	62	60	0.00225655	0.0797097	0.206667	0.272913	0.153115	transcriptional repressor BetI
Lac107_00003680	206	221	560	317	0.00222946	0.0800357	0.123333	0.180534	0.0824331	hypothetical protein
Lac107_00010390	131	334	66	165	0.00236411	0.0820722	0.12	0.176726	0.0797192	hypothetical protein
Lac107_00066060	119	152	253	294	0.00237129	0.0821897	0.153333	0.214363	0.107306	Superfamily I DNA and RNA helicases
Lac107_00029010	88	148	57	59	0.00235909	0.0824274	0.236667	0.305146	0.179584	FOG: Ankyrin repeat
Lac107_00010120	317	706	227.5	271	0.00241173	0.0833464	0.03	0.0672453	0.0130942	hypothetical protein
Lac107_00010670	223	667	147	290	0.00252541	0.0861935	0.02	0.0534507	0.00732161	nicotinate phosphoribosyltransferase
Lac107_00068380	18	22	43	46	0.00253742	0.0873798	0.266667	0.33696	0.206471	Uncharacterized protein conserved in bacteria
Lac107_00007840	1329	3826	712	1588	0.00265402	0.089329	0	0.0216378	1.73472e-18	Uncharacterized protein conserved in bacteria
Lac107_00002750	63	128	48	46	0.0026237	0.0894835	0.213333	0.280115	0.158957	hypothetical protein
Lac107_00001900	104	45	198	98	0.00271121	0.0900026	0.18	0.24386	0.129988	hypothetical protein
Lac107_00065850	536	1157	338	474	0.00271285	0.0901782	0	0.0216378	1.73472e-18	Phage-related protein
Lac107_00065020	205	189	128	70	0.00277161	0.0907827	0.13	0.188119	0.0878928	hypothetical protein
Lac107_00007870	46	92	27	40	0.00273653	0.0924508	0.203333	0.269303	0.150202	hypothetical protein
Lac107_00005960	360	546.5	163	286	0.00287688	0.094869	0.0166667	0.0486654	0.0055844	hypothetical protein
Lac107_00021700	46	127	21	64	0.00293505	0.0950443	0.133333	0.191896	0.090638	Protein of unknown function (DUF2384).
Lac107_00026930	19	51	16	14	0.00300488	0.0983427	0.243333	0.31225	0.185524	Methyl-accepting chemotaxis protein
Lac107_00030600	83	179	52	80	0.00301063	0.0985806	0.14	0.199422	0.0961576	Tellurite resistance protein and related permeases
Lac107_00013840	32	24	66	52	0.00326445	0.100313	0.23	0.298021	0.173664	Asp-tRNAAsn/Glu-tRNAGln amidotransferase A subunit and related amidases
Lac107_00005810	288	96	500	267	0.00310126	0.100631	0.04	0.0804486	0.0194581	hypothetical protein
Lac107_00006880	20	11	42	29	0.00318735	0.101358	0.263333	0.333444	0.203464	hypothetical protein
Lac107_00002720	2042	7189.5	1093	2924	0.0032584	0.102902	0	0.0216378	1.73472e-18	hypothetical protein
Lac107_00030430	242.5	295.5	142	132	0.00331293	0.104167	0.0566667	0.101596	0.0309227	Chemotaxis signal transduction protein
Lac107_00014120	115	207.5	64	100	0.00336269	0.105144	0.0733333	0.122007	0.0431239	poly(hydroxyalkanoate) granule-associated protein
Lac107_00005760	528	192	1038.5	433	0.00337926	0.105465	0.00666667	0.0333799	0.00130266	hypothetical protein
Lac107_00028610	120	88.5	243	164	0.00347809	0.106437	0.11	0.165231	0.0716461
Lac107_00005480	267	413.5	157.5	188	0.00347197	0.107962	0.02	0.0534507	0.00732161	hypothetical protein
Lac107_00005980	52	26	93	65	0.00354994	0.111027	0.193333	0.258437	0.1415	hypothetical protein
Lac107_00005730	145	71	271	150	0.0037145	0.112101	0.116667	0.172906	0.0770165	Type II secretory pathway, component PulF
Lac107_00030460	62	105	30.5	53	0.00386522	0.113345	0.0966667	0.149729	0.0610586	lipid kinase YegS
Lac107_00005630	300	114	521	294	0.00378089	0.1155	0.0133333	0.0437521	0.00397538	hypothetical protein
Lac107_00061060	33	61	21	23	0.00382803	0.115547	0.13	0.188119	0.0878928	hypothetical protein
Lac107_00055460	391	268	709	614	0.00384203	0.116201	0	0.0216378	1.73472e-18	carbon storage regulator (csrA)
Lac107_00061510	28	26	49	62	0.00397608	0.117505	0.173333	0.23653	0.124273	Response regulator containing a CheY-like receiver domain and an HD-GYP domain
Lac107_00005230	190	324	117	149	0.0040998	0.120545	0.00333333	0.0277687	0.000391473	hypothetical protein
Lac107_00002170	249.5	455	157	204	0.00408706	0.121148	0.00666667	0.0333799	0.00130266	hypothetical protein
Lac107_00021710	348	971	193	467	0.00422206	0.122544	0	0.0216378	1.73472e-18	putative quinone oxidoreductase, YhdH/YhfP family
Lac107_00003650	219	205	434	395	0.00425959	0.123075	0.0166667	0.0486654	0.0055844	hypothetical protein
Lac107_00043650	14	20	5	7	0.00433189	0.12401	0.19	0.254803	0.138613	hypothetical protein
Lac107_00047740	48	57	22	29	0.00449451	0.126926	0.116667	0.172906	0.0770165	ABC-type sugar transport systems, permease components
Lac107_00038490	6	5	17	17	0.00439922	0.127148	0.193333	0.258437	0.1415	hypothetical protein
Lac107_00062440	111	164	70	74	0.00456253	0.129894	0.0266667	0.0627255	0.0110916	Predicted transcriptional regulator
Lac107_00007880	434	1108	275	498	0.00456747	0.130525	0	0.0216378	1.73472e-18	hypothetical protein
Lac107_00051880	29.5	41	15	17	0.00462095	0.130985	0.11	0.165231	0.0716461	Protein of unknown function (DUF3509).
Lac107_00036680	21	49	16	15	0.0045826	0.133624	0.14	0.199422	0.0961576	Predicted outer membrane protein
Lac107_00058830	524	1278	313	585	0.00475735	0.133821	0	0.0216378	1.73472e-18	Negative regulator of sigma E activity
Lac107_00048590	119	138	50	84	0.00487475	0.134111	0.04	0.0804486	0.0194581	membrane protein AbrB duplication
Lac107_00050360	17	62	11	25	0.00478594	0.134915	0.0833333	0.133992	0.0507057	Urease accessory protein UreF
Lac107_00041330	262	281	114	170	0.00485088	0.135382	0.00666667	0.0333799	0.00130266	Zn-dependent alcohol dehydrogenases
Lac107_00057440	41	45	98	69	0.0049173	0.136008	0.12	0.176726	0.0797192	diguanylate cyclase (GGDEF) domain
Lac107_00005560	303	127	499	334	0.00492384	0.136218	0.00666667	0.0333799	0.00130266	Type IV secretory pathway, VirB10 components
Lac107_00006590	223	98	403	211	0.00498631	0.13769	0.00666667	0.0333799	0.00130266	Type II secretory pathway, component PulF
Lac107_00019160	67	154	42	73	0.00501084	0.137779	0.0366667	0.0760997	0.0172846	hypothetical protein
Lac107_00010340	72	188	46	90	0.00502637	0.137839	0.0333333	0.0717007	0.0151612	hypothetical protein
Lac107_00009030	184	355	125	158	0.00507513	0.137998	0	0.0216378	1.73472e-18	Transcriptional regulator
Lac107_00039920	19	24	8	9	0.00511971	0.140447	0.183333	0.247514	0.132856	Methyl-accepting chemotaxis protein
Lac107_00009650	23	34	11	14	0.00512898	0.143841	0.126667	0.184332	0.0851577
Lac107_00058850	1958	4898.5	1062	2127	0.00538876	0.144555	0	0.0216378	1.73472e-18	RNA polymerase sigma factor RpoE
Lac107_00021220	107	95	70	35	0.00539737	0.146712	0.06	0.105729	0.0333127	diguanylate cyclase (GGDEF) domain
Lac107_00052450	135	198	71	106	0.00565175	0.14933	0.00666667	0.0333799	0.00130266	2-methylcitrate synthase/citrate synthase II
Lac107_00005660	280	121	470	293	0.00565773	0.150872	0	0.0216378	1.73472e-18	Tfp pilus assembly protein, pilus retraction ATPase PilT
Lac107_00026330	44	58	18	32	0.00572259	0.151231	0.07	0.117972	0.0406366	Ribose/xylose/arabinose/galactoside ABC-type transport systems, permease components
Lac107_00057420	51	59	23	32	0.00581982	0.151445	0.0633333	0.109834	0.0357295	Methyl-accepting chemotaxis protein
Lac107_00051570	192	378	111	190	0.00575264	0.151841	0.00333333	0.0277687	0.000391473	nucleotide sugar dehydrogenase
Lac107_00015890	52	66	33	26	0.00604285	0.155845	0.0866667	0.137951	0.0532695	Protein of unknown function (DUF2986).
Lac107_00002690	270	557	161	272	0.00598746	0.156713	0	0.0216378	1.73472e-18	hypothetical protein
Lac107_00010720	484	221	869	505	0.00607114	0.157181	0	0.0216378	1.73472e-18	filamentous haemagglutinin family N-terminal domain
Lac107_00066580	138	195	100	78	0.00613189	0.158065	0.00666667	0.0333799	0.00130266	hypothetical protein
Lac107_00026340	210	238	91	147	0.00624731	0.159244	0.00333333	0.0277687	0.000391473	ABC-type sugar transport system, ATPase component
Lac107_00003660	328	283	690	480	0.00652702	0.164565	0	0.0216378	1.73472e-18	hypothetical protein
Lac107_00050300	26	32	16	10	0.00668135	0.166618	0.106667	0.161376	0.0689793	hypothetical protein
Lac107_00065970	25	35	11	16	0.00705024	0.171294	0.0733333	0.122007	0.0431239	Demethylmenaquinone methyltransferase
Lac107_00025290	101	248	63	125	0.00691966	0.172094	0	0.0216378	1.73472e-18	Acyl-CoA dehydrogenases
Lac107_00049310	23	19	47	39	0.00702603	0.172801	0.123333	0.180534	0.0824331	Site-specific recombinase XerD
Lac107_00010380	172	355	105	179	0.00719224	0.176629	0.00333333	0.0277687	0.000391473	hypothetical protein
Lac107_00029560	194	254.5	110	132	0.00732103	0.177912	0.00333333	0.0277687	0.000391473	SOS-response transcriptional repressors (RecA-mediated autopeptidases)
Lac107_00047550	94	84	51	43	0.00742866	0.178333	0.0366667	0.0760997	0.0172846	Multidrug resistance efflux pump
Lac107_00058840	1696.5	4479	886	2089	0.00747892	0.178852	0	0.0216378	1.73472e-18	Negative regulator of sigma E activity
Lac107_00005940	39	14	72	32	0.00743081	0.180478	0.09	0.141893	0.0558501	hypothetical protein
Lac107_00006600	228	107	399	223	0.00767697	0.182733	0	0.0216378	1.73472e-18	Type II secretory pathway, ATPase PulE/Tfp pilus assembly pathway, ATPase PilB
Lac107_00031430	355	429	230	189	0.00777502	0.184456	0	0.0216378	1.73472e-18	flagellar biosynthesis anti-sigma factor FlgM
Lac107_00038630	182	144	109	69	0.00827031	0.189513	0	0.0216378	1.73472e-18	PAS domain S-box
Lac107_00021140	30	27	11	15	0.00835459	0.190976	0.0566667	0.101596	0.0309227	hypothetical protein
Lac107_00023820	73	130	57	53	0.00837258	0.194621	0.00333333	0.0277687	0.000391473	hypothetical protein
Lac107_00047730	122	159	66	88	0.0085403	0.194716	0	0.0216378	1.73472e-18	ABC-type sugar transport system, periplasmic component
Lac107_00017500	74	75	41	38	0.00883087	0.196461	0.0266667	0.0627255	0.0110916	hypothetical protein
Lac107_00035650	60	110	37	54	0.00858288	0.196727	0.0133333	0.0437521	0.00397538	Nucleoside-diphosphate-sugar epimerases
Lac107_00065870	573	1095	332	545	0.00874639	0.19998	0	0.0216378	1.73472e-18	hypothetical protein
Lac107_00049240	9	6	19	19	0.00884057	0.201768	0.12	0.176726	0.0797192	Uncharacterized protein conserved in bacteria (DUF2345).
Lac107_00003900	167	102	294	196	0.00898093	0.202679	0	0.0216378	1.73472e-18	hypothetical protein
Lac107_00058340	4	7	17	13	0.00927729	0.205929	0.13	0.188119	0.0878928	hypothetical protein
Lac107_00006260	602	273.5	1029.5	627	0.00938987	0.209484	0	0.0216378	1.73472e-18	Topoisomerase IA
Lac107_00026590	140	171	74	98	0.00950471	0.20961	0	0.0216378	1.73472e-18	hypothetical protein
Lac107_00010060	418	689	290	306	0.00961324	0.211327	0	0.0216378	1.73472e-18	hypothetical protein
Lac107_00046680	219	217	122	119	0.0097819	0.212348	0	0.0216378	1.73472e-18	Flagellar basal body-associated protein
Lac107_00009350	102	232	84	101	0.00997175	0.213036	0.00333333	0.0277687	0.000391473	hypothetical protein
Lac107_00009090	159	220.5	92	118	0.00975848	0.213812	0	0.0216378	1.73472e-18	putative toxin-antitoxin system antitoxin component, TIGR02293 family
Lac107_00003840	96	51	167	97	0.0104083	0.218435	0	0.0216378	1.73472e-18	hypothetical protein
Lac107_00006570	84	31	125	82	0.0101854	0.218667	0.0266667	0.0627255	0.0110916	hypothetical protein
Lac107_00067750	109	137	81	55	0.0102074	0.220062	0.00333333	0.0277687	0.000391473	hypothetical protein
Lac107_00028830	50	68	29	33	0.0104015	0.221204	0.02	0.0534507	0.00732161	Transcriptional regulators containing a DNA-binding HTH domain and an aminotransferase domain (MocR family) and their eukaryotic orthologs
Lac107_00052460	179	253	82	157	0.0104475	0.222091	0	0.0216378	1.73472e-18	methylisocitrate lyase
Lac107_00015680	3	2	13	6	0.0107929	0.223445	0.11	0.165231	0.0716461	hypothetical protein
Lac107_00008960	81	101	57	42	0.0106279	0.223573	0.01	0.0386753	0.00252968	hypothetical protein
Lac107_00018290	21	21	9	9	0.01068	0.224147	0.0533333	0.0974348	0.0285616	hypothetical protein
Lac107_00002180	32	62	20	28	0.0107308	0.225991	0.0233333	0.0581316	0.00916307	hypothetical protein
Lac107_00002680	398	753	242	385	0.0109414	0.22676	0	0.0216378	1.73472e-18	hypothetical protein
Lac107_00033310	168	215.5	103	111	0.0107112	0.227384	0	0.0216378	1.73472e-18	Esterase/lipase
Lac107_00067780	57	65	40	26	0.0110979	0.230416	0.03	0.0672453	0.0130942	hypothetical protein
Lac107_00055440	1083.5	979.5	2047.5	1973	0.0111935	0.231586	0	0.0216378	1.73472e-18	alanine--tRNA ligase
Lac107_00043000	10	20	3	8	0.0112373	0.232974	0.0633333	0.109834	0.0357295	TadE-like protein.
Lac107_00049280	22	17	50	29	0.0115143	0.234102	0.04	0.0804486	0.0194581	hypothetical protein
Lac107_00049870-scaffold00016_376916	45	62	25	31	0.0117039	0.234927	0.01	0.0386753	0.00252968	hypothetical protein
Lac107_00030630	30	37	12	20	0.011387	0.235715	0.0266667	0.0627255	0.0110916	Putative intracellular protease/amidase
Lac107_00031450	502	571	292	297	0.0115485	0.235753	0	0.0216378	1.73472e-18	Chemotaxis signal transduction protein
Lac107_00048140	362	470.5	227	235	0.0117438	0.238734	0	0.0216378	1.73472e-18	Predicted transcriptional regulators
Lac107_00014340	21	44	14	17	0.0122724	0.24115	0.0266667	0.0627255	0.0110916	SmpA / OmlA family.
Lac107_00005700	854	362	1511	770	0.0121569	0.244248	0	0.0216378	1.73472e-18	Pilin accessory protein (PilO).
Lac107_00030620	110	194.5	59	113	0.0120389	0.244337	0	0.0216378	1.73472e-18	hypothetical protein
Lac107_00062450	109	148	63	81	0.012285	0.247427	0	0.0216378	1.73472e-18	Plasmid stabilization system protein
Lac107_00027380	12	9	24	23	0.0124045	0.248744	0.0666667	0.113915	0.0381713	Biopolymer transport protein
Lac107_00007770	380	846	287	385	0.0126226	0.25035	0	0.0216378	1.73472e-18	hypothetical protein
Lac107_00051680	50	52	74	109	0.012864	0.251025	0.0133333	0.0437521	0.00397538	mannose-1-phosphate guanylyltransferase/mannose-6-phosphate isomerase
Lac107_00014110	214	348	131	186	0.0129639	0.253271	0	0.0216378	1.73472e-18	poly(hydroxyalkanoate) granule-associated protein
Lac107_00059300	76	153	44	85	0.0132326	0.254523	0	0.0216378	1.73472e-18	type VI secretion protein, EvpB/VC_A0108 family
Lac107_00015240	69	72	47	30	0.0131429	0.255289	0.0133333	0.0437521	0.00397538	Protein of unknown function (DUF1654).
Lac107_00022580	302	374	166	215	0.0134339	0.256974	0	0.0216378	1.73472e-18	signal peptide peptidase SppA, 36K type
Lac107_00061880	52	57	25	33	0.0137061	0.259427	0.00666667	0.0333799	0.00130266	Glycine cleavage system T protein (aminomethyltransferase)
Lac107_00029490	172	180	100	100	0.013472	0.261373	0	0.0216378	1.73472e-18	PilZ domain.
Lac107_00010700	508	1035	352	493	0.0140374	0.263781	0	0.0216378	1.73472e-18	NTP pyrophosphohydrolases including oxidative damage repair enzymes
Lac107_00021590	13	14	26	30	0.0142746	0.265909	0.0566667	0.101596	0.0309227	Alcohol dehydrogenase, class IV
Lac107_00021630	5	8	12	21	0.0141756	0.267181	0.05	0.0932423	0.0262317	2,3-diaminopropionate biosynthesis protein SbnA
Lac107_00050020	0	1	3	7	0.0141391	0.268827	0.00333333	0.0277687	0.000391473	Non-ribosomal peptide synthetase modules and related proteins
Lac107_00054760	12	9	3	3	0.0147651	0.27098	0.05	0.0932423	0.0262317	Protein of Unknown function (DUF2784).
Lac107_00006870	136	77	206	167	0.0146742	0.271667	0	0.0216378	1.73472e-18	hypothetical protein
Lac107_00020970	6	16	4	3	0.0147209	0.27167	0.05	0.0932423	0.0262317	hypothetical protein
Lac107_00058990	14	34	10	12	0.0148887	0.273184	0.03	0.0672453	0.0130942	hypothetical protein
Lac107_00063380	171	223.5	95	130	0.0147773	0.273749	0	0.0216378	1.73472e-18	hypothetical protein
Lac107_00065860	783.5	1492	524	713	0.0149334	0.273806	0	0.0216378	1.73472e-18	Uncharacterized conserved small protein
Lac107_00006380	131	55	222	103	0.0147915	0.274294	0	0.0216378	1.73472e-18	hypothetical protein
Lac107_00003860	172.5	89	309	146	0.0155061	0.278587	0	0.0216378	1.73472e-18	Zn-dependent hydrolases, including glyoxylases
Lac107_00037310	336	514	189	292	0.0153811	0.278862	0	0.0216378	1.73472e-18	DNA repair protein RecN
Lac107_00067470	239	272	150.5	143	0.0155049	0.280415	0	0.0216378	1.73472e-18	Protein of unknown function (DUF3742).
Lac107_00005930	282	143	443	303	0.015653	0.281153	0	0.0216378	1.73472e-18	thymidylate synthase
Lac107_00005420	55	113	45	49	0.0156847	0.281205	0	0.0216378	1.73472e-18	hypothetical protein
Lac107_00059680	18	22	10	8	0.015348	0.281246	0.04	0.0804486	0.0194581	hypothetical protein
Lac107_00050260-scaffold00023_451290	6	3	1	0	0.0171975	0.283101	0.05	0.0932423	0.0262317	hypothetical protein
Lac107_00029800	113	186	63	108	0.0155529	0.283164	0	0.0216378	1.73472e-18	3-oxoacid CoA-transferase, A subunit
Lac107_00056060	60	77	26	50	0.0161722	0.284837	0.00333333	0.0277687	0.000391473	methylmalonic acid semialdehyde dehydrogenase
Lac107_00007560	767	367	1328	742	0.016001	0.284938	0	0.0216378	1.73472e-18	Uncharacterized conserved protein
Lac107_00041300	93	153	23	119	0.0163252	0.285101	0	0.0216378	1.73472e-18	L-alanine-DL-glutamate epimerase and related enzymes of enolase superfamily
Lac107_00004380	74	161	46	88	0.0158052	0.285297	0	0.0216378	1.73472e-18	hypothetical protein
Lac107_00033740	311	577.5	160	345	0.0160201	0.286121	0	0.0216378	1.73472e-18	Long-chain fatty acid transport protein
Lac107_00038530	155	128	97.5	66	0.0162279	0.289577	0	0.0216378	1.73472e-18	DnaJ-class molecular chaperone with C-terminal Zn finger domain
Lac107_00026620	452	435	250	256	0.0164896	0.290381	0	0.0216378	1.73472e-18	Methyl-accepting chemotaxis protein
Lac107_00050370	12	48	13	16	0.0165992	0.291264	0.0266667	0.0627255	0.0110916	urease accessory protein UreG
Lac107_00036780	45	53	18	35	0.0167133	0.291575	0	0.0216378	1.73472e-18	Maltoporin (phage lambda and maltose receptor)
Lac107_00066760	138	146	90	73	0.0168839	0.291855	0	0.0216378	1.73472e-18	Predicted periplasmic ligand-binding sensor domain
Lac107_00061080	245	452	171	229	0.0167653	0.293369	0	0.0216378	1.73472e-18	Protein of unknown function (DUF3423).
Lac107_00036040	69	62	43	30	0.0170617	0.293585	0.00666667	0.0333799	0.00130266	hypothetical protein
Lac107_00000240	773	2079	546	1004	0.0170871	0.294816	0	0.0216378	1.73472e-18	hypothetical protein
Lac107_00050310	6	16	2	5	0.0162991	0.294855	0.03	0.0672453	0.0130942	hypothetical protein
Lac107_00029570	39	37	17	23	0.0172255	0.297047	0.01	0.0386753	0.00252968	hypothetical protein
Lac107_00006800	151	235	79	144	0.017464	0.298466	0	0.0216378	1.73472e-18	ATPases involved in chromosome partitioning
Lac107_00060750	627	590.5	297	391	0.0175775	0.299748	0	0.0216378	1.73472e-18	Uncharacterized protein conserved in bacteria
Lac107_00040180	308	275	162	175	0.0178831	0.299776	0	0.0216378	1.73472e-18	hypothetical protein
Lac107_00014240	17	24	11	7	0.0185165	0.301059	0.0166667	0.0486654	0.0055844	Methyl-accepting chemotaxis protein
Lac107_00040630	98	106	43	75	0.0173782	0.301428	0	0.0216378	1.73472e-18	Enoyl-CoA hydratase/carnithine racemase
Lac107_00041280	131	138.5	56	100	0.0178336	0.301979	0	0.0216378	1.73472e-18	2-keto-3-deoxy-galactonokinase
Lac107_00031460	169.5	185	92	115	0.0180659	0.301986	0	0.0216378	1.73472e-18	Methylase of chemotaxis methyl-accepting proteins
Lac107_00059700	13	13	3	6	0.0179359	0.302083	0.0366667	0.0760997	0.0172846	psiF repeat.
Lac107_00003670	298.5	320	613.5	473	0.0180396	0.302202	0	0.0216378	1.73472e-18	hypothetical protein
Lac107_00030960	25	52	19	22	0.0179811	0.302451	0.01	0.0386753	0.00252968	Methyl-accepting chemotaxis protein
Lac107_00065420	5	6	7	22	0.0181464	0.303057	0.0433333	0.0847526	0.0216766	DNA replication protein
Lac107_00006580	257	111	409	226	0.0181143	0.303168	0	0.0216378	1.73472e-18	hypothetical protein
Lac107_00048990	22	39	15	15	0.0179421	0.303795	0.03	0.0672453	0.0130942	Methyl-accepting chemotaxis protein
Lac107_00007040	223	78	346	173	0.018107	0.304159	0	0.0216378	1.73472e-18	hypothetical protein
Lac107_00048150	349.5	630	204	357	0.0185676	0.306464	0	0.0216378	1.73472e-18	NADPH:quinone reductase and related Zn-dependent oxidoreductases
Lac107_00058690	149	138	80	88	0.0187171	0.306738	0	0.0216378	1.73472e-18	diguanylate cyclase (GGDEF) domain
Lac107_00021610	13	12	23	28	0.0189391	0.307354	0.0333333	0.0717007	0.0151612	hypothetical protein
Lac107_00025680	26	38	18	15	0.0184767	0.311962	0.00666667	0.0333799	0.00130266	formaldehyde dehydrogenase, glutathione-independent
Lac107_00031690	928	950	513	536	0.0188314	0.312025	0	0.0216378	1.73472e-18	flagellar biosynthetic protein FliS
Lac107_00058680	82	59	44	36	0.0198013	0.312448	0.00333333	0.0277687	0.000391473	Protein of unknown function (DUF3034).
Lac107_00026230	93	147	55	83	0.0186516	0.313583	0	0.0216378	1.73472e-18	Cysteine-rich secretory protein family.
Lac107_00057850	174	199	110	108	0.019283	0.31375	0	0.0216378	1.73472e-18	Methyl-accepting chemotaxis protein
Lac107_00021620	11	12	21	27	0.0191739	0.315951	0.0433333	0.0847526	0.0216766	2,3-diaminopropionate biosynthesis protein SbnB
Lac107_00004000	16	19	7	9	0.0194471	0.32008	0.01	0.0386753	0.00252968	hypothetical protein
Lac107_00061400	84	60.5	50	32	0.0202504	0.32065	0	0.0216378	1.73472e-18	Signal transduction histidine kinase
Lac107_00028000	53	103.5	47	43	0.020207	0.324619	0	0.0216378	1.73472e-18	Aldo/keto reductases, related to diketogulonate reductase
Lac107_00053380	69	57	114	103	0.0204968	0.325919	0	0.0216378	1.73472e-18	Type IV secretory pathway, VirB10 components
Lac107_00051890	22	17	10	8	0.0208679	0.327039	0.02	0.0534507	0.00732161	hypothetical protein
Lac107_00057680	33	71	21	38	0.0210671	0.327134	0	0.0216378	1.73472e-18	Uncharacterized conserved protein
Lac107_00055450	961.5	911	1658	1750	0.0209215	0.327777	0	0.0216378	1.73472e-18	aspartate kinase, monofunctional class
Lac107_00016930	563	666	306	399	0.0207018	0.328463	0	0.0216378	1.73472e-18	hypothetical protein
Lac107_00005330	262	489.5	208	232	0.0211201	0.329091	0	0.0216378	1.73472e-18	Endonuclease I
Lac107_00053040	657	1504	453	761	0.0210911	0.329145	0	0.0216378	1.73472e-18	prevent-host-death family protein
Lac107_00005720	690	298	1115	630	0.021184	0.329899	0	0.0216378	1.73472e-18	Type II secretory pathway, ATPase PulE/Tfp pilus assembly pathway, ATPase PilB
Lac107_00018310	293	297	195	151	0.0207637	0.330358	0	0.0216378	1.73472e-18	Ogr/Delta-like zinc finger.
Lac107_00022570	164	263	100.5	151	0.0213965	0.330775	0	0.0216378	1.73472e-18	haloacid dehalogenase superfamily, subfamily IA, variant 1 with third motif having Dx(3-4)D or Dx(3-4)E
Lac107_00038790	1916.5	1680.5	1023	953	0.0214226	0.331415	0	0.0216378	1.73472e-18	Predicted periplasmic or secreted lipoprotein
Lac107_00005970	375	220	653	378	0.0212424	0.33184	0	0.0216378	1.73472e-18	hypothetical protein
Lac107_00018320	72	35	34	26	0.0218543	0.332688	0.00333333	0.0277687	0.000391473	phage portal protein, PBSX family
Lac107_00032270	31	41	24	14	0.0218626	0.334029	0.0166667	0.0486654	0.0055844	hypothetical protein
Lac107_00046030	148	223.5	108	112	0.021951	0.334229	0	0.0216378	1.73472e-18	general secretion pathway protein F
Lac107_00009640	87	146	65	72	0.0216784	0.334917	0	0.0216378	1.73472e-18
Lac107_00033540	101	126	65	69	0.0221149	0.335404	0	0.0216378	1.73472e-18	ubiquinone biosynthesis O-methyltransferase
Lac107_00014400	23	39	19	13	0.0221736	0.336694	0.00666667	0.0333799	0.00130266	Protein of unknown function (DUF3455).
Lac107_00040030	397.5	688	229	400	0.0220224	0.337189	0	0.0216378	1.73472e-18	peroxiredoxin
Lac107_00005620	24	10	40	24	0.0216423	0.337859	0.0233333	0.0581316	0.00916307	hypothetical protein
Lac107_00046670	79	75	49	40	0.0225966	0.340356	0	0.0216378	1.73472e-18	Uncharacterized conserved protein
Lac107_00006500	116	50	152	128	0.022439	0.340508	0	0.0216378	1.73472e-18	Ribonucleotide reductase, alpha subunit
Lac107_00053140	145	176	91	99	0.0228919	0.341463	0	0.0216378	1.73472e-18	hypothetical protein
Lac107_00005540	69	35	118	61	0.0223854	0.341581	0	0.0216378	1.73472e-18	Macrophage killing protein with similarity to conjugation protein.
Lac107_00003780	35	65	25	31	0.023108	0.344759	0	0.0216378	1.73472e-18	hypothetical protein
Lac107_00066670	16	22	10	7	0.0235177	0.344985	0.02	0.0534507	0.00732161	Deoxycytidylate deaminase
Lac107_00007160	70	87	58	33	0.0237433	0.345045	0	0.0216378	1.73472e-18	hypothetical protein
Lac107_00056070	48	47.5	16	37	0.0233479	0.345914	0	0.0216378	1.73472e-18	3-hydroxyisobutyrate dehydrogenase
Lac107_00063450	38	49	23	25	0.0234905	0.346115	0.00666667	0.0333799	0.00130266	Putative threonine efflux protein
Lac107_00047760	177	185	93	123	0.0235521	0.346333	0	0.0216378	1.73472e-18	ABC-type sugar transport systems, ATPase components
Lac107_00030860	10	18	5	6	0.02288	0.346531	0.00666667	0.0333799	0.00130266	Protein of unknown function (DUF1652).
Lac107_00006910	112	74	210	105	0.0231031	0.347208	0	0.0216378	1.73472e-18	hypothetical protein
Lac107_00036030	277.5	366	171	209	0.0233195	0.347281	0	0.0216378	1.73472e-18	Response regulator containing CheY-like receiver, AAA-type ATPase, and DNA-binding domains
Lac107_00061090	49	61	27	35	0.0233135	0.349004	0	0.0216378	1.73472e-18	hypothetical protein
Lac107_00045320	23	26	10	14	0.0234975	0.349302	0.0133333	0.0437521	0.00397538	hypothetical protein
Lac107_00006960	92	57	162	88	0.0238011	0.349757	0	0.0216378	1.73472e-18	hypothetical protein
Lac107_00006970	1028	386	1657.5	848	0.0236619	0.351043	0	0.0216378	1.73472e-18	dUTPase.
Lac107_00014060	18	35	16	11	0.02377	0.352318	0.00666667	0.0333799	0.00130266	Poly(3-hydroxyalkanoate) synthetase
Lac107_00030290	89	123	58	67	0.0243522	0.352958	0	0.0216378	1.73472e-18	SOS regulatory protein LexA
Lac107_00040620	87	112	43	75	0.0246821	0.355032	0	0.0216378	1.73472e-18	Rhs element Vgr protein
Lac107_00044390	67	76	36	48	0.0243403	0.35598	0.00333333	0.0277687	0.000391473	D-fructose-responsive transcription factor
Lac107_00052590	142	108	74	75	0.0243473	0.356628	0	0.0216378	1.73472e-18	Predicted acetyltransferase
Lac107_00016450	12	11	5	3	0.0247238	0.356651	0.0266667	0.0627255	0.0110916	hypothetical protein
Lac107_00053030	201	426	464	610	0.0246433	0.356714	0	0.0216378	1.73472e-18	Plasmid stabilization system protein
Lac107_00043740	166	189.5	100	113	0.0248385	0.358701	0	0.0216378	1.73472e-18	Predicted permease, DMT superfamily
Lac107_00006000	209	133	316	256	0.0247078	0.359298	0	0.0216378	1.73472e-18	hypothetical protein
Lac107_00055020	26	30	11	18	0.0253927	0.359795	0.00333333	0.0277687	0.000391473	Acetyltransferase (GNAT) family.
Lac107_00045070	15	29	8	13	0.0243961	0.361002	0.00333333	0.0277687	0.000391473	hypothetical protein
Lac107_00060760	265	291.5	168	165	0.0250953	0.361265	0	0.0216378	1.73472e-18	Sugar phosphate permease
Lac107_00047260	45	38	24	22	0.0262909	0.361595	0.00333333	0.0277687	0.000391473	Nitroreductase family.
Lac107_00056160	58	65	27	44	0.0258711	0.361653	0	0.0216378	1.73472e-18	Putative NADPH-quinone reductase (modulator of drug activity B)
Lac107_00061000	35	47	11	34	0.0250497	0.362996	0	0.0216378	1.73472e-18	Ribose/xylose/arabinose/galactoside ABC-type transport systems, permease components
Lac107_00030700	63	93	27	64	0.0257682	0.364163	0	0.0216378	1.73472e-18	homogentisate 1,2-dioxygenase
Lac107_00005550	196	121	306	224	0.0255153	0.365151	0	0.0216378	1.73472e-18	Protein of unknown function (DUF3625).
Lac107_00020940	66	95	49	46	0.0262888	0.365275	0	0.0216378	1.73472e-18	Predicted transcription factor, homolog of eukaryotic MBF1
Lac107_00047750	36	31	20	16	0.0259858	0.365879	0	0.0216378	1.73472e-18	ABC-type sugar transport system, permease component
Lac107_00066210	152	152.5	99	84	0.0262156	0.366834	0	0.0216378	1.73472e-18	Methyl-accepting chemotaxis protein
Lac107_00067250	39	59	68	97	0.0273064	0.369086	0	0.0216378	1.73472e-18	Response regulator containing CheY-like receiver, AAA-type ATPase, and DNA-binding domains
Lac107_00011490	7	7	3	0	0.0267094	0.370612	0.0433333	0.0847526	0.0216766	hypothetical protein
Lac107_00020250	32	40	18	21	0.0273906	0.37224	0.00333333	0.0277687	0.000391473	SOS regulatory protein LexA
Lac107_00057040	7	12	19	21	0.027217	0.373767	0.01	0.0386753	0.00252968	ABC-type sugar transport system, ATPase component
Lac107_00045830	74	97	46	56	0.0273991	0.373969	0	0.0216378	1.73472e-18	Predicted hydrolases or acyltransferases (alpha/beta hydrolase superfamily)
Lac107_00005650	356	235	559	439	0.0275097	0.37397	0	0.0216378	1.73472e-18	hypothetical protein
Lac107_00021830	64	84	41	47	0.0273181	0.374302	0	0.0216378	1.73472e-18	hypothetical protein
Lac107_00006660	342	154	538	294	0.0270311	0.37477	0	0.0216378	1.73472e-18	hypothetical protein
Lac107_00040050	326	521	221	283	0.0271621	0.375191	0	0.0216378	1.73472e-18	Plasmid replication region DNA-binding N-term.
Lac107_00006270	286	106	439	216	0.0276001	0.376159	0	0.0216378	1.73472e-18	hypothetical protein
Lac107_00060990	71	60	32	44	0.0278893	0.377487	0	0.0216378	1.73472e-18	Transcriptional regulators
Lac107_00056200	3261	2890	1624	1753	0.0279089	0.378979	0	0.0216378	1.73472e-18	ribosomal protein L27
Lac107_00046760	34	53	24	25	0.0283302	0.380498	0	0.0216378	1.73472e-18	Glycine/D-amino acid oxidases (deaminating)
Lac107_00045880	42	78	27	43	0.0280094	0.381069	0	0.0216378	1.73472e-18	Arabinose efflux permease
Lac107_00038220	245	342	157	197	0.0284696	0.381159	0	0.0216378	1.73472e-18	S-adenosyl-methyltransferase MraW
Lac107_00022590	58	82.5	36	47	0.0282481	0.381852	0	0.0216378	1.73472e-18	MAF protein
Lac107_00023520	286	327.5	168	202	0.0282838	0.381895	0	0.0216378	1.73472e-18	putative efflux protein, MATE family
Lac107_00036610	30	39	17	20	0.028497	0.382795	0.00666667	0.0333799	0.00130266	ABC-type anion transport system, duplicated permease component
Lac107_00013680	57	43	83	85	0.0288685	0.384049	0.00333333	0.0277687	0.000391473	Dehydrogenases (flavoproteins)
Lac107_00014980	16	10	22	28	0.0285863	0.386245	0.0266667	0.0627255	0.0110916	acetylornithine deacetylase (ArgE)
Lac107_00057900	35	34	61	56	0.0292516	0.38661	0	0.0216378	1.73472e-18	Phage integrase family.
Lac107_00066170	54	75.5	40	36	0.0293635	0.387066	0	0.0216378	1.73472e-18	hypothetical protein
Lac107_00030160	32	44	17	25	0.0290869	0.389745	0	0.0216378	1.73472e-18	Predicted sugar epimerase
Lac107_00060240	28	42	17	21	0.0293425	0.390879	0.00333333	0.0277687	0.000391473	Flp pilus assembly protein CpaB
Lac107_00028890	23	29	16	11	0.0295278	0.392408	0.01	0.0386753	0.00252968	hypothetical protein
Lac107_00020950	43	60	34	25	0.0297134	0.393167	0.00333333	0.0277687	0.000391473	hypothetical protein
Lac107_00024610	24	40	14	20	0.0302605	0.394634	0	0.0216378	1.73472e-18	Protein of unknown function (DUF1654).
Lac107_00028520	92	154	68	81	0.0299382	0.395327	0	0.0216378	1.73472e-18	xanthine dehydrogenase, small subunit
Lac107_00027910	357	325	228.5	185	0.0306289	0.395847	0	0.0216378	1.73472e-18	Methyl-accepting chemotaxis protein
Lac107_00030360	396	893	255	511	0.0305093	0.39637	0	0.0216378	1.73472e-18	fatty oxidation complex, alpha subunit FadB
Lac107_00011300	13	16	7	6	0.0301754	0.397312	0.01	0.0386753	0.00252968	Uncharacterized ABC-type transport system, periplasmic component/surface lipoprotein
Lac107_00005070	79	165	69	79	0.0303939	0.398008	0	0.0216378	1.73472e-18	hypothetical protein
Lac107_00065650	92	162	82	72	0.0305907	0.39951	0	0.0216378	1.73472e-18	glycine cleavage system H protein
Lac107_00062300	19	38	11	19	0.0311894	0.401519	0.00666667	0.0333799	0.00130266	Cyclic nucleotide-binding domain.
Lac107_00013610	65	56	98	102	0.0312425	0.401537	0	0.0216378	1.73472e-18	Acyl-coenzyme A synthetases/AMP-(fatty) acid ligases
Lac107_00043930	22	22	45	33	0.0312956	0.402402	0.0133333	0.0437521	0.00397538	Cellulase (glycosyl hydrolase family 5).
Lac107_00047160	32.5	31	17	17	0.0313614	0.402516	0.00333333	0.0277687	0.000391473	hypothetical protein
Lac107_00002740	86	214	77	107	0.0317881	0.404841	0	0.0216378	1.73472e-18	hypothetical protein
Lac107_00019150	37	28	18	18	0.0321672	0.405961	0	0.0216378	1.73472e-18	hypothetical protein
Lac107_00005170	412	629	369.5	256	0.0318408	0.406059	0	0.0216378	1.73472e-18	hypothetical protein
Lac107_00005130	195	392	158	200	0.0320961	0.406863	0	0.0216378	1.73472e-18	hypothetical protein
Lac107_00055490	322	500	221	276	0.0322254	0.406946	0	0.0216378	1.73472e-18	Mg2+ transporter (mgtE)
Lac107_00008880	311	385	240	183	0.0328202	0.407959	0	0.0216378	1.73472e-18	Alkaline phytoceramidase (aPHC).
Lac107_00030280	142	263	92	156	0.0328629	0.409328	0	0.0216378	1.73472e-18	Transcriptional regulator
Lac107_00065290	25	26	14	12	0.0327091	0.409791	0.00333333	0.0277687	0.000391473	Protein of unknown function (DUF1652).
Lac107_00061850	10	24	4	12	0.0336841	0.411136	0	0.0216378	1.73472e-18	5,10-methylene-tetrahydrofolate dehydrogenase/Methenyl tetrahydrofolate cyclohydrolase
Lac107_00048350	26	26	10	17	0.0324909	0.411568	0.00666667	0.0333799	0.00130266	hypothetical protein
Lac107_00006040	321	155	512	271	0.0334884	0.411766	0	0.0216378	1.73472e-18	Topoisomerase IA
Lac107_00016840	221.5	319	140	190	0.032919	0.412075	0	0.0216378	1.73472e-18	PEP phosphonomutase and related enzymes
Lac107_00052730	32	26	15	16	0.0329114	0.413779	0.00333333	0.0277687	0.000391473	Methyl-accepting chemotaxis protein
Lac107_00028920	204	228	139	126	0.0329459	0.41436	0	0.0216378	1.73472e-18	hypothetical protein
Lac107_00005520	12	7.5	25	14	0.0344496	0.414623	0.0233333	0.0581316	0.00916307	hypothetical protein
Lac107_00016650	1490	2243	869	1272	0.0333375	0.415231	0	0.0216378	1.73472e-18	cysteine desulfurase IscS
Lac107_00016920	495	566	314	327	0.0339169	0.415812	0	0.0216378	1.73472e-18	GIY-YIG catalytic domain.
Lac107_00061070	548	812.5	347	467	0.0334676	0.417306	0	0.0216378	1.73472e-18	methionine aminopeptidase, type I
Lac107_00061740-scaffold00044_117150	3	3	0	0	0.0335297	0.417617	0	0.0216378	1.73472e-18	Non-ribosomal peptide synthetase modules and related proteins
Lac107_00005710	596	282	970	499	0.0338707	0.41768	0	0.0216378	1.73472e-18	Type IV pilus biogenesis.
Lac107_00014600	7	10	5	1	0.0333813	0.418359	0.00666667	0.0333799	0.00130266	hypothetical protein
Lac107_00064450	58	61	32	38	0.0337427	0.418395	0	0.0216378	1.73472e-18	ATPases involved in chromosome partitioning
Lac107_00028190	89	134	57	80	0.0338862	0.419971	0	0.0216378	1.73472e-18	Methyl-accepting chemotaxis protein
Lac107_00055810	24	53	14	29	0.0348466	0.420286	0	0.0216378	1.73472e-18	L-serine dehydratase, iron-sulfur-dependent, single chain form
Lac107_00060920	38	44	25	23	0.0340357	0.420771	0	0.0216378	1.73472e-18	hypothetical protein
Lac107_00032490	20	21	8	12	0.0348534	0.422266	0	0.0216378	1.73472e-18	periplasmic protein thiol:disulfide oxidoreductases, DsbE subfamily
Lac107_00061190	96.5	129	74	64	0.0342621	0.422717	0	0.0216378	1.73472e-18	Bacterial protein of unknown function (DUF903).
Lac107_00017420	102	131.5	54	89	0.034646	0.42458	0	0.0216378	1.73472e-18	Outer membrane protein and related peptidoglycan-associated (lipo)proteins
Lac107_00036720	6	16	3	6	0.0342571	0.426354	0.00333333	0.0277687	0.000391473	Lactoylglutathione lyase and related lyases
Lac107_00057690	36	58	28	27	0.0361321	0.42838	0	0.0216378	1.73472e-18	putative toxin-antitoxin system antitoxin component, TIGR02293 family
Lac107_00063020	9	7	2	3	0.0364413	0.42838	0.00333333	0.0277687	0.000391473	Type II secretory pathway, component PulM
Lac107_00057000	18	12	7	6	0.0355096	0.429404	0.01	0.0386753	0.00252968	Protein of unknown function (DUF3237).
Lac107_00000110	228	149	371	241	0.0360938	0.429664	0	0.0216378	1.73472e-18	hypothetical protein
Lac107_00006480	474	195	714	391	0.0353475	0.429767	0	0.0216378	1.73472e-18	Guanylate kinase
Lac107_00065310	1238.5	1313	771	728	0.0360307	0.431201	0	0.0216378	1.73472e-18	hypothetical protein
Lac107_00005270	290	152	472	248	0.0365889	0.432723	0	0.0216378	1.73472e-18	Soluble lytic murein transglycosylase and related regulatory proteins (some contain LysM/invasin domains)
Lac107_00062210	31	53	27	21	0.0367576	0.432912	0.00333333	0.0277687	0.000391473	Uncharacterized protein involved in outer membrane biogenesis
Lac107_00023850	65	70	31	50	0.0366956	0.43564	0	0.0216378	1.73472e-18	peroxiredoxin, OsmC subfamily
Lac107_00005830	386	155	574.5	312	0.0368782	0.435944	0	0.0216378	1.73472e-18	hypothetical protein
Lac107_00041810	93	100	153	158	0.0370514	0.438164	0	0.0216378	1.73472e-18	RHS repeat-associated core domain
Lac107_00041240	184	292.5	111	185	0.0368629	0.438518	0	0.0216378	1.73472e-18	3-isopropylmalate dehydratase, large subunit
Lac107_00047770	503.5	681	273	446	0.0368824	0.438532	0	0.0216378	1.73472e-18	Carbohydrate-selective porin
Lac107_00061360	15	38	18	10	0.0375157	0.438656	0.00666667	0.0333799	0.00130266	hypothetical protein
Lac107_00030470	124	110	88	59	0.037847	0.440546	0	0.0216378	1.73472e-18	Undecaprenyl-phosphate glucose phosphotransferase
Lac107_00062860	29	63	20	33	0.0380066	0.440547	0	0.0216378	1.73472e-18	Arabinose efflux permease
Lac107_00015660	42	82	34	41	0.038236	0.442011	0	0.0216378	1.73472e-18	Transcriptional regulator
Lac107_00032100	29	29	20	12	0.0384911	0.443912	0	0.0216378	1.73472e-18	hypothetical protein
Lac107_00016680	433.5	576	260.5	358	0.0381568	0.444374	0	0.0216378	1.73472e-18	Fe-S protein assembly co-chaperone HscB
Lac107_00063730	93	121	45	88	0.0386433	0.445059	0	0.0216378	1.73472e-18	MIP family channel proteins
Lac107_00011660	35	44	21	24	0.0364651	0.445071	0	0.0216378	1.73472e-18	Acetyltransferases
Lac107_00011370	37	45	29	18	0.0396253	0.445326	0.00666667	0.0333799	0.00130266	Copper chaperone
Lac107_00025390	29	31	55	46	0.0384077	0.446836	0	0.0216378	1.73472e-18	Predicted phosphatase
Lac107_00040020	335	506.5	219	301	0.0393325	0.447356	0	0.0216378	1.73472e-18	alkyl hydroperoxide reductase, F subunit
Lac107_00061350	19	42	9	24	0.0390048	0.448842	0	0.0216378	1.73472e-18	Predicted membrane protein
Lac107_00014350	87	175.5	50	113	0.0392971	0.449131	0	0.0216378	1.73472e-18	Bacterial lipocalin
Lac107_00003720	225	333	171	177	0.0393744	0.449557	0	0.0216378	1.73472e-18	hypothetical protein
Lac107_00030030	57	65	36	38	0.0390492	0.450679	0	0.0216378	1.73472e-18	Protein of unknown function (DUF2789).
Lac107_00042760	33	23	16	15	0.0401541	0.451111	0	0.0216378	1.73472e-18	Bacterial protein of unknown function (DUF894).
Lac107_00005900	249	143	411	221	0.040143	0.452031	0	0.0216378	1.73472e-18	Arylsulfatase regulator (Fe-S oxidoreductase)
Lac107_00002880	104	203	84	107	0.0396972	0.452153	0	0.0216378	1.73472e-18	hypothetical protein
Lac107_00007850	2033	3590	1419	1805	0.0404743	0.453032	0	0.0216378	1.73472e-18	Uncharacterized proteins involved in stress response, homologs of TerZ and putative cAMP-binding protein CABP1
Lac107_00008940	133	192	100	103	0.0404635	0.453265	0	0.0216378	1.73472e-18	transposase, IS605 OrfB family, central region
Lac107_00031660	748	854	470	503	0.0407766	0.456797	0	0.0216378	1.73472e-18	Flagellin and related hook-associated proteins
Lac107_00052940	27	48	20	23	0.0402739	0.45808	0	0.0216378	1.73472e-18	hypothetical protein
Lac107_00002890	124	178	92	98	0.0413211	0.458422	0	0.0216378	1.73472e-18	hypothetical protein
Lac107_00062430	60	46	32	31	0.0411572	0.458701	0	0.0216378	1.73472e-18	hypothetical protein
Lac107_00046210	12	12	32	15	0.0422489	0.459431	0.00666667	0.0333799	0.00130266
Lac107_00046740	6	7.5	3	1	0.0399759	0.459689	0.01	0.0386753	0.00252968	hypothetical protein
Lac107_00002150	96	163	81.5	81	0.0419107	0.461412	0	0.0216378	1.73472e-18	hypothetical protein
Lac107_00064980	9	6	3	2	0.0426466	0.461787	0.00666667	0.0333799	0.00130266	hypothetical protein
Lac107_00049790	6	6	1	2	0.0427577	0.461791	0.00333333	0.0277687	0.000391473	hypothetical protein
Lac107_00025580	88	123	48	83	0.0416391	0.461847	0	0.0216378	1.73472e-18	Transcriptional regulator containing an amidase domain and an AraC-type DNA-binding HTH domain
Lac107_00043190	34	30	19	17	0.0428931	0.462054	0	0.0216378	1.73472e-18	hypothetical protein
Lac107_00014780	124	131	67	92	0.0430511	0.462213	0	0.0216378	1.73472e-18	haloacid dehalogenase superfamily, subfamily IA, variant 3 with third motif having DD or ED/haloacid dehalogenase superfamily, subfamily IA, variant 1 with third motif having Dx(3-4)D or Dx(3-4)E
Lac107_00005610	222	119	368	176	0.0426561	0.462358	0	0.0216378	1.73472e-18	hypothetical protein
Lac107_00010530	12	7	6	1	0.0422505	0.462395	0.0133333	0.0437521	0.00397538
Lac107_00003760	35	59	30	27	0.0425483	0.462501	0	0.0216378	1.73472e-18	hypothetical protein
Lac107_00014900	5	17	5	4	0.0419711	0.463187	0.00666667	0.0333799	0.00130266	amine acid ABC transporter, permease protein, 3-TM region, His/Glu/Gln/Arg/opine family
Lac107_00006770	584	263	998	391	0.0422375	0.464501	0	0.0216378	1.73472e-18	hypothetical protein
Lac107_00009400	1424	4232	1219.5	2045	0.0425395	0.464581	0	0.0216378	1.73472e-18	Uncharacterized protein containing a von Willebrand factor type A (vWA) domain
Lac107_00028840	55	56	36	31	0.0408384	0.465088	0	0.0216378	1.73472e-18	Glutathione S-transferase
Lac107_00036220	70	110	45	67	0.0427891	0.465109	0	0.0216378	1.73472e-18	Predicted membrane protein
Lac107_00040250	76.5	81	52	45	0.0432345	0.465612	0	0.0216378	1.73472e-18	Protein of unknown function (DUF2934).
Lac107_00014820	50	72	29	46	0.0435319	0.4661	0	0.0216378	1.73472e-18	Ammonia permease
Lac107_00053370	90	107	129	184	0.0432008	0.467179	0	0.0216378	1.73472e-18	P-type DNA transfer ATPase VirB11
Lac107_00033650	3	9	1	2	0.043042	0.468303	0	0.0216378	1.73472e-18	Fumarase
Lac107_00010830	24	45	15	24	0.0423539	0.468655	0	0.0216378	1.73472e-18	Uncharacterized conserved protein
Lac107_00042960	48.5	80	29	49	0.0430494	0.469971	0	0.0216378	1.73472e-18	Uncharacterized protein conserved in bacteria
Lac107_00047200	20	23	14	8	0.0435034	0.471652	0.00333333	0.0277687	0.000391473	hypothetical protein
Lac107_00023870	142	116	104	59	0.0440897	0.471691	0	0.0216378	1.73472e-18	Protein of unknown function (DUF1161).
Lac107_00033430	31	38	17	22	0.0435074	0.472944	0	0.0216378	1.73472e-18	Predicted exonuclease of the beta-lactamase fold involved in RNA processing
Lac107_00055680-contig00834_151	287	172	444	289	0.0446409	0.473849	0	0.0216378	1.73472e-18	hypothetical protein
Lac107_00045690	1	1	4	5	0.0447173	0.474476	0	0.0216378	1.73472e-18	hypothetical protein
Lac107_00015100	23	33	21	10	0.0446028	0.474575	0.00333333	0.0277687	0.000391473	Predicted ICC-like phosphoesterases
Lac107_00007140	249	134	353	254	0.0444264	0.474834	0	0.0216378	1.73472e-18	thymidylate kinase
Lac107_00001730	184	288	134	164	0.0446498	0.475208	0	0.0216378	1.73472e-18	hypothetical protein
Lac107_00007460	10	27	7	12	0.0434515	0.476215	0	0.0216378	1.73472e-18
Lac107_00032760	147	151	75	112	0.045872	0.47827	0	0.0216378	1.73472e-18	Protein of unknown function (DUF2491).
Lac107_00022560	309	523	218.5	303	0.0457696	0.478722	0	0.0216378	1.73472e-18	pseudouridine synthase, RluA family
Lac107_00061940	19	17	10	8	0.0468673	0.479369	0.00333333	0.0277687	0.000391473	hypothetical protein
Lac107_00013820	53	83	45	39	0.0464868	0.479716	0	0.0216378	1.73472e-18	uroporphyrinogen decarboxylase
Lac107_00068520	31	37	27	12	0.046243	0.481532	0	0.0216378	1.73472e-18	hypothetical protein
Lac107_00049110	73	80	43	51	0.0457523	0.484064	0	0.0216378	1.73472e-18	Hemolysin activation/secretion protein
Lac107_00026610	28	32	16	18	0.0481582	0.48513	0	0.0216378	1.73472e-18	Transcriptional regulator
Lac107_00006940	180	102	277	168	0.0464221	0.48518	0	0.0216378	1.73472e-18	Preprotein translocase subunit SecA (ATPase, RNA helicase)
Lac107_00022990	91	134	50	92	0.0474608	0.488552	0	0.0216378	1.73472e-18	NADH:flavin oxidoreductases, Old Yellow Enzyme family
Lac107_00054080	63	90	54	41	0.0476364	0.488928	0	0.0216378	1.73472e-18	hypothetical protein
Lac107_00029250	27	36	15	20	0.0474431	0.488957	0	0.0216378	1.73472e-18	Protein of unknown function (DUF1652).
Lac107_00022970	45	74	34	40	0.0477522	0.489897	0	0.0216378	1.73472e-18	AraC-type DNA-binding domain-containing proteins
Lac107_00018210	86	102	57	61	0.0478092	0.490538	0	0.0216378	1.73472e-18	Protein of unknown function (DUF1654).
Lac107_00060940	210	222	132	142	0.0480964	0.492232	0	0.0216378	1.73472e-18	Peptidase inhibitor I78 family.
Lac107_00003370	138	84	225	124	0.048902	0.492251	0	0.0216378	1.73472e-18	efflux transporter, outer membrane factor (OMF) lipoprotein, NodT family
Lac107_00048180	127	172	85	107	0.0490507	0.496029	0	0.0216378	1.73472e-18	dipeptidase, putative
Lac107_00067510	53	56	35	31	0.0491748	0.496038	0	0.0216378	1.73472e-18	hypothetical protein
Lac107_00018950	16	17	7	9	0.0498103	0.497405	0	0.0216378	1.73472e-18	tartrate dehydrogenase
Lac107_00046730	47	68	30	41	0.0498408	0.49826	0	0.0216378	1.73472e-18	Predicted acyltransferase
Lac107_00054270	58	109	39	65	0.0501873	0.49851	0	0.0216378	1.73472e-18	Uncharacterized conserved protein
Lac107_00029090	106	113	74	66	0.0493009	0.498624	0	0.0216378	1.73472e-18	Protein of unknown function (DUF1260).
Lac107_00045030	56	69	34	43	0.0490638	0.499506	0	0.0216378	1.73472e-18	Transcriptional regulator
Lac107_00019680	119	122	68	86	0.0491247	0.499743	0	0.0216378	1.73472e-18	Acetyl/propionyl-CoA carboxylase, alpha subunit
Lac107_00057020	101	65	64	41	0.0505057	0.50029	0	0.0216378	1.73472e-18	Methyl-accepting chemotaxis protein
Lac107_00039930	12	31	8	15	0.0489861	0.500315	0	0.0216378	1.73472e-18	HAMP domain.
Lac107_00033110	30	35	21	17	0.049921	0.501243	0	0.0216378	1.73472e-18	HAMP domain.
Lac107_00019720	437	714	254	467	0.0506732	0.502181	0	0.0216378	1.73472e-18	Acyl-CoA dehydrogenases
Lac107_00031480	53	76	30	50	0.049632	0.502983	0	0.0216378	1.73472e-18	cyanate hydratase
Lac107_00014880	15.5	23	9	11	0.0524305	0.504807	0	0.0216378	1.73472e-18	Transcriptional regulator
Lac107_00036660	14	34	12	14	0.0491328	0.505353	0	0.0216378	1.73472e-18	Mn-containing catalase
Lac107_00060780	42	38	21	26	0.0499537	0.506435	0	0.0216378	1.73472e-18	Transcriptional regulators
Lac107_00054900	49	66	30	41	0.051044	0.507407	0	0.0216378	1.73472e-18	hypothetical protein
Lac107_00010080	81	63	140	86	0.0513453	0.507562	0	0.0216378	1.73472e-18	hypothetical protein
Lac107_00007130	258	155	378	268	0.0519895	0.508142	0	0.0216378	1.73472e-18	hypothetical protein
Lac107_00003400	43	80	50	27	0.0531625	0.509102	0	0.0216378	1.73472e-18	hypothetical protein
Lac107_00054600	365	339	564	555	0.0521598	0.511172	0	0.0216378	1.73472e-18	ATP-dependent DNA helicase RecQ
Lac107_00030370	22	22	13	11	0.0530784	0.511764	0.00333333	0.0277687	0.000391473	hypothetical protein
Lac107_00000980	31	18	56	26	0.0528942	0.51236	0	0.0216378	1.73472e-18	Small-conductance mechanosensitive channel
Lac107_00015250	13	28	6	16	0.0523692	0.513773	0	0.0216378	1.73472e-18	hypothetical protein
Lac107_00019630	45	47	32	24	0.0532667	0.516098	0	0.0216378	1.73472e-18	ABC-type sugar transport system, periplasmic component
Lac107_00005790	200	91.5	296	162	0.0540953	0.518061	0	0.0216378	1.73472e-18	hypothetical protein
Lac107_00027850	202	188	119	131	0.0528867	0.518445	0	0.0216378	1.73472e-18	Methyl-accepting chemotaxis protein
Lac107_00005670	50	23	76	41	0.0535378	0.519401	0	0.0216378	1.73472e-18	hypothetical protein
Lac107_00003390	78	40	108	78	0.0536395	0.519599	0	0.0216378	1.73472e-18	hypothetical protein
Lac107_00021840	154	214	129	108	0.0553144	0.519881	0	0.0216378	1.73472e-18	hypothetical protein
Lac107_00001250	115	79	193	107	0.055063	0.520533	0	0.0216378	1.73472e-18	hypothetical protein
Lac107_00036200	252	337	142	237	0.0555598	0.524481	0	0.0216378	1.73472e-18	amino acid carrier protein
Lac107_00036460	30	73	28	35	0.0541368	0.524653	0	0.0216378	1.73472e-18	Protein of unknown function (DUF3617).
Lac107_00029000	21	37	15.5	18	0.0553101	0.525164	0	0.0216378	1.73472e-18	Protein of unknown function (DUF3509).
Lac107_00001720	263	375	195	215	0.0553152	0.525887	0	0.0216378	1.73472e-18	Uncharacterized protein conserved in bacteria
Lac107_00061410	23	18	14	8	0.0564521	0.526394	0.00333333	0.0277687	0.000391473	hypothetical protein
Lac107_00040530	547	863.5	273	612	0.0545202	0.526736	0	0.0216378	1.73472e-18	Indolepyruvate ferredoxin oxidoreductase, alpha and beta subunits
Lac107_00041310	102.5	111	51.5	86	0.0564915	0.527589	0	0.0216378	1.73472e-18	D-galactonate transporter
Lac107_00052150	25	24	16	10	0.0575824	0.528345	0	0.0216378	1.73472e-18	FOG: HPt domain
Lac107_00017160	751	816.5	387	597	0.0565633	0.529085	0	0.0216378	1.73472e-18	Homoserine dehydrogenase
Lac107_00002570	288	446	227	242	0.0556268	0.529309	0	0.0216378	1.73472e-18	Inhibitor of the KinA pathway to sporulation, predicted exonuclease
Lac107_00006810	12	15	8	5	0.057472	0.529686	0	0.0216378	1.73472e-18	hypothetical protein
Lac107_00050560	29	33	39	61	0.0576163	0.529865	0	0.0216378	1.73472e-18	Uncharacterized protein conserved in bacteria
Lac107_00015170	35	84	34	40	0.0568899	0.529975	0	0.0216378	1.73472e-18	ABC-type amino acid transport/signal transduction systems, periplasmic component/domain
Lac107_00023060	77	59	32	54	0.0552046	0.530055	0	0.0216378	1.73472e-18	Transcriptional activator of acetoin/glycerol metabolism
Lac107_00010330	56	135	38	85	0.0577159	0.530899	0	0.0216378	1.73472e-18	Nicotinic acid mononucleotide adenylyltransferase
Lac107_00033160	157	108	228	181	0.0568804	0.531814	0	0.0216378	1.73472e-18	Zn-dependent protease with chaperone function
Lac107_00028780	39	52	29	26	0.0563087	0.532803	0	0.0216378	1.73472e-18	Putative NADP-dependent oxidoreductases
Lac107_00021820	21	31	15	14	0.0579248	0.533489	0	0.0216378	1.73472e-18	hypothetical protein
Lac107_00015260	25	47	19	24	0.0561569	0.533646	0	0.0216378	1.73472e-18	Conserved secreted protein
Lac107_00033610	113	130	68	88	0.0565995	0.533852	0	0.0216378	1.73472e-18	Predicted protein-disulfide isomerase
Lac107_00028250	20	23	11	12	0.0586885	0.535427	0	0.0216378	1.73472e-18	Non-ribosomal peptide synthetase modules and related proteins
Lac107_00015290	18	24	8	14	0.0581176	0.53575	0	0.0216378	1.73472e-18	Uncharacterized protein conserved in bacteria
Lac107_00027120	119	92	60	77	0.058611	0.536081	0	0.0216378	1.73472e-18	Predicted transcriptional regulators
Lac107_00028990	35	50	19	32	0.0597266	0.536123	0	0.0216378	1.73472e-18	Response regulator containing a CheY-like receiver domain and an HTH DNA-binding domain
Lac107_00027950	28	31	17	17	0.0574442	0.536738	0	0.0216378	1.73472e-18	Domain of Unknown Function (DUF1206).
Lac107_00015650	25	42	16	24	0.0588825	0.540007	0	0.0216378	1.73472e-18	Predicted hydrolases or acyltransferases (alpha/beta hydrolase superfamily)
Lac107_00064960	4	2	0	0	0.0652548	0.54029	0	0.0216378	1.73472e-18	phage terminase, small subunit, putative, P27 family
Lac107_00054560	109	89	63	65	0.0594668	0.540906	0	0.0216378	1.73472e-18	PAS domain S-box
Lac107_00010790	66	53	128.5	56	0.0605674	0.541118	0	0.0216378	1.73472e-18	hypothetical protein
Lac107_00005740	409	168.5	555	347	0.0595327	0.541607	0	0.0216378	1.73472e-18	Tfp pilus assembly protein PilE
Lac107_00023750	6	10	2	4	0.0599283	0.542489	0	0.0216378	1.73472e-18	hypothetical protein
Lac107_00007860	1109	1815	810	993	0.0593475	0.542634	0	0.0216378	1.73472e-18	Uncharacterized proteins involved in stress response, homologs of TerZ and putative cAMP-binding protein CABP1
Lac107_00044410	89	119	60	74	0.0583007	0.543836	0	0.0216378	1.73472e-18	1-phosphofructokinase
Lac107_00054370	223.5	384	173	219	0.0600226	0.543967	0	0.0216378	1.73472e-18	Lipid A 3-O-deacylase (PagL).
Lac107_00025630	14	17	11	5	0.0587346	0.544086	0	0.0216378	1.73472e-18	sarcosine oxidase, beta subunit family, heterotetrameric form
Lac107_00025810	187	265	135	158	0.0604487	0.544422	0	0.0216378	1.73472e-18	glycine betaine aldehyde dehydrogenase
Lac107_00018140	270	475	191	291	0.0599154	0.545866	0	0.0216378	1.73472e-18	Flavodoxin reductases (ferredoxin-NADPH reductases) family 1
Lac107_00056190	2604.5	3807	1742	2091	0.0603004	0.546337	0	0.0216378	1.73472e-18	ribosomal protein L21
Lac107_00040680	2	4	0	0	0.0652512	0.546536	0	0.0216378	1.73472e-18	hypothetical protein
Lac107_00049470	3	2	2	11	0.0601857	0.546789	0	0.0216378	1.73472e-18	Non-ribosomal peptide synthetase modules and related proteins
Lac107_00023610	103	165.5	74	100	0.0600492	0.548434	0	0.0216378	1.73472e-18	Response regulator of the LytR/AlgR family
Lac107_00007200	113.5	63	176.5	93	0.0623236	0.549232	0	0.0216378	1.73472e-18	hypothetical protein
Lac107_00026780	35	29	22	15	0.0630022	0.549435	0.00333333	0.0277687	0.000391473	Transcriptional regulator containing GAF, AAA-type ATPase, and DNA binding domains
Lac107_00024010	20	26	14	12	0.0624973	0.550649	0	0.0216378	1.73472e-18	Protein of unknown function (DUF3630).
Lac107_00000290	97	65	140	110	0.0615117	0.552203	0	0.0216378	1.73472e-18	hypothetical protein
Lac107_00018060	1731.5	3043.5	1082	1818	0.0620375	0.552222	0	0.0216378	1.73472e-18	protein RecA
Lac107_00043850	12	8	5	3	0.0631674	0.552451	0	0.0216378	1.73472e-18	Uncharacterized membrane protein
Lac107_00009100	51	98	44	51	0.062205	0.553069	0	0.0216378	1.73472e-18	Uncharacterized conserved protein
Lac107_00066230	77	102	49	66	0.0621758	0.553283	0	0.0216378	1.73472e-18	Response regulators consisting of a CheY-like receiver domain and a winged-helix DNA-binding domain
Lac107_00002020	118	76	184	111	0.0632227	0.556835	0	0.0216378	1.73472e-18	hypothetical protein
Lac107_00033710	154	169	106.5	105	0.0637543	0.557443	0	0.0216378	1.73472e-18	Uncharacterized protein conserved in bacteria
Lac107_00027960	44	69	27	45	0.064017	0.557528	0	0.0216378	1.73472e-18	Gluconolactonase
Lac107_00067440	10	11	6	3	0.0634834	0.557974	0.0133333	0.0437521	0.00397538	hypothetical protein
Lac107_00000600	167	114	278	153	0.0642614	0.558007	0	0.0216378	1.73472e-18	hypothetical protein
Lac107_00018560	47	67	37	35	0.0641014	0.560584	0	0.0216378	1.73472e-18	hypothetical protein
Lac107_00044090	6	11	3	4	0.0641635	0.564312	0	0.0216378	1.73472e-18	hypothetical protein
Lac107_00020360	18	17	25	33	0.0661248	0.565981	0	0.0216378	1.73472e-18	Transcriptional regulator
Lac107_00052420	82	97	63	53	0.0651268	0.566065	0	0.0216378	1.73472e-18	Uncharacterized protein conserved in bacteria
Lac107_00041110	3	4	10	7	0.0683627	0.566782	0.00666667	0.0333799	0.00130266	RND family efflux transporter, MFP subunit
Lac107_00039500	36	92	31	51	0.0658286	0.566964	0	0.0216378	1.73472e-18	Signal transduction histidine kinase, nitrogen specific
Lac107_00020580	12	13	5	6	0.0653558	0.567526	0	0.0216378	1.73472e-18	Fatty acid desaturase
Lac107_00014230	63	70	51	35	0.0653221	0.56772	0	0.0216378	1.73472e-18	Methyl-accepting chemotaxis protein
Lac107_00029100	47.5	61.5	85	83	0.0660744	0.56845	0	0.0216378	1.73472e-18	Uncharacterized conserved protein
Lac107_00005110	25	30	23	9	0.0674731	0.568638	0	0.0216378	1.73472e-18	hypothetical protein
Lac107_00017180	131	90	73	71	0.0647637	0.568684	0	0.0216378	1.73472e-18	PAS domain S-box
Lac107_00055010	33.5	50	20	31	0.0657476	0.569192	0	0.0216378	1.73472e-18	ABC-type proline/glycine betaine transport systems, periplasmic components
Lac107_00010610	132	115	216	160	0.0671912	0.569866	0	0.0216378	1.73472e-18	hypothetical protein
Lac107_00034330	8	7	3	2	0.0678463	0.570127	0.00666667	0.0333799	0.00130266	hypothetical protein
Lac107_00026490	32	32	18	20	0.0684157	0.570783	0	0.0216378	1.73472e-18	FAD/FMN-containing dehydrogenases
Lac107_00010800	107	59	143	108	0.0673695	0.571142	0	0.0216378	1.73472e-18	hypothetical protein
Lac107_00015870	13.5	22	29	31	0.0697711	0.572165	0	0.0216378	1.73472e-18	Predicted ester cyclase
Lac107_00059370	96	154	66	98	0.0681167	0.572517	0	0.0216378	1.73472e-18	oxidoreductase alpha (molybdopterin) subunit
Lac107_00040040	246	352	156	236	0.0674568	0.574554	0	0.0216378	1.73472e-18	Site-specific recombinase XerD
Lac107_00064320	2	6	1	0	0.069143	0.574756	0.01	0.0386753	0.00252968	hypothetical protein
Lac107_00003150	138	175	119.5	88	0.0686561	0.575461	0	0.0216378	1.73472e-18	hypothetical protein
Lac107_00014870	8	16	5	6	0.0656953	0.575477	0.00333333	0.0277687	0.000391473	hypothetical protein
Lac107_00055560	53	81	43	43	0.068631	0.57575	0	0.0216378	1.73472e-18	Site-specific recombinases, DNA invertase Pin homologs
Lac107_00035780	43.5	48	27	30	0.0693745	0.576014	0	0.0216378	1.73472e-18	AraC-like ligand binding domain.
Lac107_00047170	32	29	19	18	0.0682243	0.57714	0	0.0216378	1.73472e-18	hypothetical protein
Lac107_00006250	137	76	226	98	0.0701542	0.577688	0	0.0216378	1.73472e-18	Soluble lytic murein transglycosylase and related regulatory proteins (some contain LysM/invasin domains)
Lac107_00023070	12	8	8	0	0.0660975	0.578377	0.01	0.0386753	0.00252968	ABC-type sugar transport systems, ATPase components
Lac107_00003560	99	49	142	82	0.0696163	0.578674	0	0.0216378	1.73472e-18	hypothetical protein
Lac107_00061740	19	19	33	30	0.0724116	0.579612	0	0.0216378	1.73472e-18	Non-ribosomal peptide synthetase modules and related proteins
Lac107_00063340	167.5	146	104	103	0.0690419	0.579665	0	0.0216378	1.73472e-18	Uncharacterized protein conserved in bacteria
Lac107_00013760	48	33.5	30	21	0.0708337	0.580493	0	0.0216378	1.73472e-18	Arabinose efflux permease
Lac107_00030930	103	77	60	58	0.0707068	0.580935	0	0.0216378	1.73472e-18	Methyl-accepting chemotaxis protein
Lac107_00009990	398	621	308	354	0.06989	0.581013	0	0.0216378	1.73472e-18	Uncharacterized conserved protein
Lac107_00047570	151	127	116	68	0.0701349	0.581112	0	0.0216378	1.73472e-18	PAS domain S-box/diguanylate cyclase (GGDEF) domain
Lac107_00020050	51	34	27	26	0.0714352	0.581302	0	0.0216378	1.73472e-18	hypothetical protein
Lac107_00052710	32	48	23	27	0.0690689	0.581558	0	0.0216378	1.73472e-18	Predicted soluble lytic transglycosylase fused to an ABC-type amino acid-binding protein
Lac107_00064050	67	88	42	59	0.0693166	0.581583	0	0.0216378	1.73472e-18	Predicted oxidoreductases (related to aryl-alcohol dehydrogenases)
Lac107_00060980	53	50	32	33	0.0715294	0.582496	0	0.0216378	1.73472e-18	ribokinase
Lac107_00004210	101	79	71	47	0.070781	0.583448	0	0.0216378	1.73472e-18	hypothetical protein
Lac107_00055040	90	135	65	84	0.0708296	0.583452	0	0.0216378	1.73472e-18	Predicted membrane protein
Lac107_00003550	227	128	393	146	0.0712041	0.583653	0	0.0216378	1.73472e-18	hypothetical protein
Lac107_00008700	1954	2360	1577	1101	0.0719171	0.583664	0	0.0216378	1.73472e-18	hypothetical protein
Lac107_00024500	3	2	7	8	0.0734072	0.583691	0.00666667	0.0333799	0.00130266	Phage tail tube protein.
Lac107_00062510	83	96	55	63	0.0710321	0.584135	0	0.0216378	1.73472e-18	Glycine cleavage system regulatory protein
Lac107_00027970	16	27	11	13	0.070827	0.585275	0.00333333	0.0277687	0.000391473	Protein of unknown function (DUF2778).
Lac107_00018450	3	3	3	13	0.0687008	0.585912	0.00333333	0.0277687	0.000391473	Bacteriophage lysis protein.
Lac107_00027050	55	79	46	41	0.0713132	0.588391	0	0.0216378	1.73472e-18	hypothetical protein
Lac107_00013600	9	5	13	15	0.0747371	0.588875	0.01	0.0386753	0.00252968	Predicted membrane protein
Lac107_00027860	12	10	4	6	0.0744527	0.589193	0	0.0216378	1.73472e-18	HDOD domain.
Lac107_00041260	296	301	161.5	232	0.0728333	0.589532	0	0.0216378	1.73472e-18	3-isopropylmalate dehydrogenase
Lac107_00030210	55	52	31	38	0.0724771	0.590538	0	0.0216378	1.73472e-18	Transcriptional regulators
Lac107_00061580	4	4	9	10	0.072741	0.591214	0	0.0216378	1.73472e-18	Predicted thioesterase involved in non-ribosomal peptide biosynthesis
Lac107_00047180	31	32.5	23	15	0.0737134	0.591338	0	0.0216378	1.73472e-18	hypothetical protein
Lac107_00047680	130	155.5	85	105	0.0737599	0.591639	0	0.0216378	1.73472e-18	Glyceraldehyde-3-phosphate dehydrogenase/erythrose-4-phosphate dehydrogenase
Lac107_00044790	104	87	75	51	0.0740234	0.591931	0	0.0216378	1.73472e-18	PilZ domain.
Lac107_00002870	595	890	457	503	0.0746079	0.592728	0	0.0216378	1.73472e-18	hypothetical protein
Lac107_00053600	1951	2442	3221	3982	0.0744471	0.592734	0	0.0216378	1.73472e-18	Site-specific recombinases, DNA invertase Pin homologs
Lac107_00007570	158	113	265	144	0.0739031	0.593588	0	0.0216378	1.73472e-18	hypothetical protein
Lac107_00009660	9	18	5	8	0.0747495	0.593718	0.00333333	0.0277687	0.000391473
Lac107_00020120	8	11	16	19	0.0735557	0.593872	0.00666667	0.0333799	0.00130266	Putative translation initiation inhibitor, yjgF family
Lac107_00063370	202	304	151	184	0.073251	0.593936	0	0.0216378	1.73472e-18	Membrane-bound lysozyme-inhibitor of c-type lysozyme.
Lac107_00032590	27	31	15	19	0.0769326	0.595747	0	0.0216378	1.73472e-18	Predicted membrane protein
Lac107_00009360	118	178.5	114	84	0.0736404	0.595765	0	0.0216378	1.73472e-18	hypothetical protein
Lac107_00023530	42	28	52	58	0.0754785	0.595895	0	0.0216378	1.73472e-18	Transcriptional regulator
Lac107_00065980	24	23	16	12	0.0764122	0.596392	0	0.0216378	1.73472e-18	Arabinose efflux permease
Lac107_00004700	447	637	354	357	0.0761076	0.596826	0	0.0216378	1.73472e-18	hypothetical protein
Lac107_00021640	3	6	8	13	0.074129	0.597526	0.00333333	0.0277687	0.000391473	Lysine/ornithine N-monooxygenase
Lac107_00043300	33	28	25	12	0.0756094	0.597559	0	0.0216378	1.73472e-18	Uncharacterized protein conserved in bacteria
Lac107_00030820	21	31	14	16	0.0772814	0.597821	0	0.0216378	1.73472e-18	carbohydrate kinase, thermoresistant glucokinase family
Lac107_00021740	40	82	32	47	0.0780401	0.598651	0	0.0216378	1.73472e-18	molybdenum ABC transporter, periplasmic molybdate-binding protein
Lac107_00050230	1	5	1	0	0.0758647	0.599374	0	0.0216378	1.73472e-18	TraG-like protein, N-terminal region.
Lac107_00011470	24	72	21	41	0.0768657	0.599445	0	0.0216378	1.73472e-18	acetyl-CoA acetyltransferases
Lac107_00021600	4	7	16	8	0.0747407	0.599598	0	0.0216378	1.73472e-18	Putative threonine efflux protein
Lac107_00017140	78	93	45	68	0.0769511	0.6	0	0.0216378	1.73472e-18	tyrosine recombinase XerD
Lac107_00047360	51	57	30	40	0.0778566	0.600702	0	0.0216378	1.73472e-18	PAS domain S-box/diguanylate cyclase (GGDEF) domain
Lac107_00001070	129	229	136	103	0.0761159	0.60104	0	0.0216378	1.73472e-18	hypothetical protein
Lac107_00048360	127	133	98	75	0.0768071	0.601448	0	0.0216378	1.73472e-18	Transcriptional regulators
Lac107_00050330	93	100	62	66	0.077065	0.602718	0	0.0216378	1.73472e-18	Uncharacterized protein involved in outer membrane biogenesis
Lac107_00000080	147	121	231	171	0.0773175	0.602758	0	0.0216378	1.73472e-18	CRISPR-associated protein (Cas_Csy2).
Lac107_00003710	202	335	182	176	0.0780677	0.603104	0	0.0216378	1.73472e-18	hypothetical protein
Lac107_00010190	242	145	341	240	0.0760431	0.603954	0	0.0216378	1.73472e-18	hypothetical protein
Lac107_00034300	6	17	4	7	0.0757785	0.604416	0	0.0216378	1.73472e-18	hypothetical protein
Lac107_00063700	475	852	303	564	0.0787378	0.60446	0	0.0216378	1.73472e-18	Glycerol-3-phosphate dehydrogenase
Lac107_00055700	30	36	26	14	0.0775229	0.606114	0	0.0216378	1.73472e-18	Cytosine/uracil/thiamine/allantoin permeases
Lac107_00052910	69	101	50	62	0.0795791	0.606236	0	0.0216378	1.73472e-18	hypothetical protein
Lac107_00019660	36.5	40	20	27	0.0803939	0.60656	0	0.0216378	1.73472e-18	Predicted acyltransferases
Lac107_00001090	331	527	277	292	0.0795265	0.606615	0	0.0216378	1.73472e-18	hypothetical protein
Lac107_00047250	217.5	218	138	153	0.0800645	0.607466	0	0.0216378	1.73472e-18	Thermostable 8-oxoguanine DNA glycosylase
Lac107_00061320	94	124	71	75	0.0806979	0.608817	0	0.0216378	1.73472e-18	Glutaredoxin-like domain (DUF836).
Lac107_00005990	177	97	251	158	0.0805255	0.609003	0	0.0216378	1.73472e-18	hypothetical protein
Lac107_00003360	286	158	419	247	0.0797092	0.609123	0	0.0216378	1.73472e-18	hypothetical protein
Lac107_00042140	38	50	30	26	0.0831576	0.609249	0	0.0216378	1.73472e-18	hypothetical protein
Lac107_00009320	403	571	339	306	0.0801146	0.609974	0	0.0216378	1.73472e-18	Chemotaxis signal transduction protein
Lac107_00058860	167	181	99	135	0.0809756	0.609993	0	0.0216378	1.73472e-18	L-aspartate oxidase
Lac107_00043970	25	32	36	55	0.082316	0.611038	0	0.0216378	1.73472e-18	Chemotaxis protein; stimulates methylation of MCP proteins
Lac107_00058080	151	132	103	87	0.0824946	0.612654	0	0.0216378	1.73472e-18	Uncharacterized protein conserved in bacteria
Lac107_00040750	39	46.5	29	25	0.0807541	0.612749	0	0.0216378	1.73472e-18	hypothetical protein
Lac107_00011920	21	21	13	11	0.0820637	0.612795	0	0.0216378	1.73472e-18	ABC-type branched-chain amino acid transport systems, ATPase component
Lac107_00010750	200	143	308.5	204	0.0814318	0.612837	0	0.0216378	1.73472e-18	hypothetical protein
Lac107_00023430	66	75	39	54	0.0823282	0.612986	0	0.0216378	1.73472e-18	Enoyl-CoA hydratase/carnithine racemase
Lac107_00053310	107	79	132.5	146	0.0821012	0.613134	0	0.0216378	1.73472e-18	Type IV secretory pathway, VirD4 components
Lac107_00032570	57	50	35	34	0.0823598	0.613332	0	0.0216378	1.73472e-18	RND family efflux transporter, MFP subunit
Lac107_00025770	11	10	7	3	0.0852306	0.613399	0	0.0216378	1.73472e-18	Uncharacterized iron-regulated membrane protein
Lac107_00052430	146	121	65	114	0.0834996	0.613719	0	0.0216378	1.73472e-18	probable AcnD-accessory protein PrpF
Lac107_00019490	22	26	12	16	0.0844932	0.613863	0	0.0216378	1.73472e-18	RecA-superfamily ATPases implicated in signal transduction
Lac107_00005590	418	161	626	248	0.0810613	0.61518	0	0.0216378	1.73472e-18	hypothetical protein
Lac107_00002790	45	64	29	42	0.0830856	0.616794	0	0.0216378	1.73472e-18	hypothetical protein
Lac107_00003640	264	200	383	311	0.0835333	0.616871	0	0.0216378	1.73472e-18	hypothetical protein
Lac107_00042970	283	388	198	251	0.0842718	0.616958	0	0.0216378	1.73472e-18	diguanylate cyclase (GGDEF) domain
Lac107_00061900	31	17	13	15	0.0791218	0.61696	0.00333333	0.0277687	0.000391473	Methyl-accepting chemotaxis protein
Lac107_00031420	347.5	469	237	305	0.0828141	0.616963	0	0.0216378	1.73472e-18	Flagellar biosynthesis/type III secretory pathway chaperone
Lac107_00000100	70	33	88	67	0.0824934	0.617084	0	0.0216378	1.73472e-18	CRISPR-associated protein Cas6/Csy4, subtype I-F/YPEST
Lac107_00043400	6	3	12	8	0.0853274	0.619309	0	0.0216378	1.73472e-18
Lac107_00020100	18	10	12	2	0.0845038	0.619422	0.00333333	0.0277687	0.000391473	amine acid ABC transporter, permease protein, 3-TM region, His/Glu/Gln/Arg/opine family
Lac107_00041840	33	46	25	25	0.0842914	0.619725	0	0.0216378	1.73472e-18	Asp-tRNAAsn/Glu-tRNAGln amidotransferase A subunit and related amidases
Lac107_00002670	132	229	115	128	0.0831906	0.620312	0	0.0216378	1.73472e-18	Uncharacterized conserved protein
Lac107_00055000	31	40	25	20	0.0855229	0.621138	0	0.0216378	1.73472e-18	hypothetical protein
Lac107_00040410	27	28	9	24	0.0833834	0.621248	0	0.0216378	1.73472e-18	Response regulator containing CheY-like receiver, AAA-type ATPase, and DNA-binding domains
Lac107_00040320	40	57	24	38	0.0844377	0.621601	0	0.0216378	1.73472e-18	Predicted dienelactone hydrolase
Lac107_00045990	47	60	34	36	0.0857175	0.622138	0	0.0216378	1.73472e-18	prepilin-type N-terminal cleavage/methylation domain
Lac107_00025890	36	51.5	31	25	0.0847033	0.623129	0	0.0216378	1.73472e-18	thiamine biosynthesis protein ThiS
Lac107_00024130	40	45	30	24	0.0858864	0.62315	0	0.0216378	1.73472e-18	DNA-3-methyladenine glycosylase I
Lac107_00061390	6	8	1	4	0.0846137	0.623368	0	0.0216378	1.73472e-18	Response regulator containing a CheY-like receiver domain and an HTH DNA-binding domain
Lac107_00024030	145	154	82	120	0.0861797	0.623484	0	0.0216378	1.73472e-18	NADPH:quinone reductase and related Zn-dependent oxidoreductases
Lac107_00000650	203	201	156.5	116	0.0840741	0.623894	0	0.0216378	1.73472e-18	hypothetical protein
Lac107_00006230	59	48	76	84	0.0851867	0.624016	0	0.0216378	1.73472e-18	hypothetical protein
Lac107_00045370	29	35	18	20	0.0853649	0.624175	0	0.0216378	1.73472e-18	Response regulator containing a CheY-like receiver domain and an HTH DNA-binding domain
Lac107_00017930	538	720.5	291	542	0.0848604	0.624785	0	0.0216378	1.73472e-18	S-(hydroxymethyl)glutathione dehydrogenase/class III alcohol dehydrogenase
Lac107_00041630	136	161	91	109	0.0870894	0.624982	0	0.0216378	1.73472e-18	Glycerol-3-phosphate dehydrogenase
Lac107_00041250	55	69	32	50	0.0851507	0.625734	0	0.0216378	1.73472e-18	3-isopropylmalate dehydratase, small subunit
Lac107_00046430	40	39	30	21	0.0863576	0.625814	0	0.0216378	1.73472e-18	cold shock domain protein CspD
Lac107_00005910	136	52	202	77	0.0873239	0.627531	0	0.0216378	1.73472e-18	hypothetical protein
Lac107_00066070	17	11	20	28	0.0880517	0.628725	0	0.0216378	1.73472e-18	integrating conjugative element membrane protein, PFL_4697 family
Lac107_00032960	23	27	15	14	0.0880381	0.628916	0	0.0216378	1.73472e-18	ABC-type nitrate/sulfonate/bicarbonate transport system, permease component
Lac107_00003160	147	124	104.5	79	0.0856556	0.629329	0	0.0216378	1.73472e-18	hypothetical protein
Lac107_00043540	64	66.5	41	46	0.0896138	0.629523	0	0.0216378	1.73472e-18	Protein of unknown function (DUF2726).
Lac107_00023940	371	303	203	249	0.0879326	0.629603	0	0.0216378	1.73472e-18	Predicted hydrolases or acyltransferases (alpha/beta hydrolase superfamily)
Lac107_00054110	366	340	247	229	0.0883845	0.629849	0	0.0216378	1.73472e-18	hypothetical protein
Lac107_00067410	79	147	58	95	0.0868224	0.629973	0	0.0216378	1.73472e-18	Acyl CoA:acetate/3-ketoacid CoA transferase, beta subunit
Lac107_00065950	39	29	18	24	0.090418	0.630248	0	0.0216378	1.73472e-18	Nitrate/nitrite transporter
Lac107_00067450	85	121	80	60	0.0877342	0.630893	0	0.0216378	1.73472e-18	hypothetical protein
Lac107_00009340	966	1225	678	752	0.0878722	0.631467	0	0.0216378	1.73472e-18	hypothetical protein
Lac107_00003230	42	27	73	33	0.0894248	0.6315	0	0.0216378	1.73472e-18	hypothetical protein
Lac107_00005570	1453.5	693	2283	1061	0.0880949	0.632195	0	0.0216378	1.73472e-18	hypothetical protein
Lac107_00021240	36	59	31	30	0.0895868	0.632937	0	0.0216378	1.73472e-18	hypothetical protein
Lac107_00066540	157	178	113.5	115	0.0885657	0.633276	0	0.0216378	1.73472e-18	Predicted transcriptional regulator
Lac107_00066770	72	84	46	59	0.0890931	0.633624	0	0.0216378	1.73472e-18	hypothetical protein
Lac107_00003850	146	66	196	118	0.0897789	0.6339	0	0.0216378	1.73472e-18	hypothetical protein
Lac107_00059660	12	15	8	6	0.0931002	0.634155	0	0.0216378	1.73472e-18	type VI secretion system effector, Hcp1 family
Lac107_00061120	169	134	118	87	0.0886133	0.634372	0	0.0216378	1.73472e-18	hypothetical protein
Lac107_00001640	888	1360	670.5	796	0.0889161	0.634499	0	0.0216378	1.73472e-18	hypothetical protein
Lac107_00017170	1121	931	588	755	0.089762	0.635876	0	0.0216378	1.73472e-18	threonine synthase
Lac107_00054550	161	197	115	128	0.0891195	0.63624	0	0.0216378	1.73472e-18	Glycosyltransferases involved in cell wall biogenesis
Lac107_00063310	31	21	15	17	0.0924659	0.637124	0	0.0216378	1.73472e-18	NADH:flavin oxidoreductases, Old Yellow Enzyme family
Lac107_00037210	4	12	1	5	0.0906464	0.637184	0	0.0216378	1.73472e-18	hypothetical protein
Lac107_00048900	71	39	42	30	0.0904551	0.637184	0	0.0216378	1.73472e-18	Response regulators consisting of a CheY-like receiver domain and a winged-helix DNA-binding domain
Lac107_00014790	482.5	541	351	335	0.0909449	0.638144	0	0.0216378	1.73472e-18	hypothetical protein
Lac107_00029460	27	41	21	22	0.0897136	0.638293	0	0.0216378	1.73472e-18	hypothetical protein
Lac107_00053080	162	113	226	179	0.092894	0.638385	0	0.0216378	1.73472e-18	hypothetical protein
Lac107_00009730	5	7	3	1	0.0903291	0.639069	0	0.0216378	1.73472e-18
Lac107_00059340	52	43	26	35	0.0914923	0.639341	0	0.0216378	1.73472e-18	hypothetical protein
Lac107_00000730	96	50	138	78	0.0923339	0.639597	0	0.0216378	1.73472e-18	hypothetical protein
Lac107_00045890	14	52	13	28	0.0918096	0.639925	0	0.0216378	1.73472e-18	Sugar phosphate permease
Lac107_00013790	19	22.5	11	13	0.0932912	0.640443	0	0.0216378	1.73472e-18	gluconate transporter
Lac107_00036790	25	27	18	13	0.0904282	0.640658	0	0.0216378	1.73472e-18	ABC-type sugar transport system, periplasmic component
Lac107_00030970	29	40	19	25	0.0917874	0.640984	0	0.0216378	1.73472e-18	Acetyltransferases
Lac107_00021420	31	22	40	44	0.0926145	0.641999	0	0.0216378	1.73472e-18	acetyl-CoA acetyltransferases
Lac107_00019610	209	411.5	148	272	0.0937996	0.643508	0	0.0216378	1.73472e-18	Sulfite reductase, beta subunit (hemoprotein)
Lac107_00032970	66	90	43	61	0.0925448	0.64359	0	0.0216378	1.73472e-18	Coenzyme F420-dependent N5,N10-methylene tetrahydromethanopterin reductase and related flavin-dependent oxidoreductases
Lac107_00031710	631	586	427	386	0.093326	0.64376	0	0.0216378	1.73472e-18	Response regulator containing CheY-like receiver, AAA-type ATPase, and DNA-binding domains
Lac107_00065780	247	327	192	199	0.0942274	0.644019	0	0.0216378	1.73472e-18	hypothetical protein
Lac107_00013640	78	67	100	113	0.0946449	0.644808	0	0.0216378	1.73472e-18	Histidine ammonia-lyase
Lac107_00040090	37	57	29.5	31	0.0957899	0.646749	0	0.0216378	1.73472e-18	hypothetical protein
Lac107_00019350	34	27	11	27	0.0931379	0.646914	0	0.0216378	1.73472e-18	ABC-type sugar transport systems, ATPase components
Lac107_00005190	1604	2360	1231	1320	0.0935211	0.646932	0	0.0216378	1.73472e-18	hypothetical protein
Lac107_00058070	228	252	166.5	160	0.0948557	0.647176	0	0.0216378	1.73472e-18	Diadenosine tetraphosphate (Ap4A) hydrolase and other HIT family hydrolases
Lac107_00063610	13	21	9	10	0.0958729	0.648386	0	0.0216378	1.73472e-18	Methionine synthase II (cobalamin-independent)
Lac107_00068160	77	80	61	45	0.0959573	0.648555	0	0.0216378	1.73472e-18	hypothetical protein
Lac107_00001590	92	102.5	62	70	0.096738	0.648716	0	0.0216378	1.73472e-18	hypothetical protein
Lac107_00003930	89	81	173	78	0.0958851	0.648881	0	0.0216378	1.73472e-18	Uncharacterized conserved small protein
Lac107_00026380	25	35	14	23	0.095992	0.650393	0	0.0216378	1.73472e-18	ABC-type metal ion transport system, periplasmic component/surface adhesin
Lac107_00044400	148	219	100	152	0.0970918	0.650403	0	0.0216378	1.73472e-18	Phosphotransferase System HPr (HPr) Family
Lac107_00006670	379	211	544	334	0.0951098	0.650531	0	0.0216378	1.73472e-18	Type II secretory pathway, component PulD
Lac107_00006240	31	43	69	42	0.09648	0.650672	0	0.0216378	1.73472e-18	Protein of unknown function (DUF1064).
Lac107_00005530	8	3	15	7	0.0975405	0.651128	0	0.0216378	1.73472e-18	hypothetical protein
Lac107_00019830	69	66	40	50	0.0954721	0.651427	0	0.0216378	1.73472e-18	Transcriptional regulator
Lac107_00045160	27	29	42	46	0.0978451	0.65153	0	0.0216378	1.73472e-18	Response regulator containing CheY-like receiver, AAA-type ATPase, and DNA-binding domains
Lac107_00033170	8	10	16	17	0.097394	0.652261	0	0.0216378	1.73472e-18	hypothetical protein
Lac107_00055430	158	162	112	108	0.0954535	0.652665	0	0.0216378	1.73472e-18	Threonine aldolase
Lac107_00039550	142	297	93	207	0.0975591	0.65284	0	0.0216378	1.73472e-18	glutamine synthetase, type I
Lac107_00061500	33	34	46	57	0.095997	0.653042	0	0.0216378	1.73472e-18	Universal stress protein UspA and related nucleotide-binding proteins
Lac107_00051910	15	27	15	10	0.094871	0.653437	0	0.0216378	1.73472e-18	hypothetical protein
Lac107_00062730	103	133	75	86	0.0987662	0.653674	0	0.0216378	1.73472e-18	Predicted periplasmic lipoprotein
Lac107_00041290	31	45	12	36	0.0976957	0.653725	0	0.0216378	1.73472e-18	2-keto-3-deoxy-6-phosphogluconate aldolase
Lac107_00032700	66	59	46	37	0.0970697	0.653863	0	0.0216378	1.73472e-18	Predicted exporters of the RND superfamily
Lac107_00025920	540	923	396	581	0.0976719	0.654521	0	0.0216378	1.73472e-18	alternative sigma factor RpoH
Lac107_00003080	123	77	176	116	0.0967364	0.65496	0	0.0216378	1.73472e-18	hypothetical protein
Lac107_00024890	39.5	32	22	24	0.101116	0.655506	0	0.0216378	1.73472e-18	dihydroneopterin aldolase
Lac107_00005220	473	910	415	512	0.0998685	0.655618	0	0.0216378	1.73472e-18	Single-stranded DNA-binding protein
Lac107_00045130	80	88	57	57	0.0983136	0.656271	0	0.0216378	1.73472e-18	Membrane protein involved in the export of O-antigen and teichoic acid
Lac107_00004140	52	54	98	60	0.0948013	0.656412	0	0.0216378	1.73472e-18	hypothetical protein
Lac107_00007550	194	186	337.5	219	0.0985122	0.656593	0	0.0216378	1.73472e-18	hypothetical protein
Lac107_00010110	214	171	350	212	0.0993778	0.657173	0	0.0216378	1.73472e-18	P pilus assembly/Cpx signaling pathway, periplasmic inhibitor/zinc-resistance associated protein
Lac107_00064840	111	116	77	78	0.0980193	0.657478	0	0.0216378	1.73472e-18	hypothetical protein
Lac107_00006030	215	109	330	143	0.0990582	0.658215	0	0.0216378	1.73472e-18	hypothetical protein
Lac107_00014710	26	28	15	18	0.0983494	0.658426	0	0.0216378	1.73472e-18	Transcription elongation factor
Lac107_00048120	155	137	96	105	0.0995857	0.65867	0	0.0216378	1.73472e-18	Methyl-accepting chemotaxis protein
Lac107_00019370	18	17	14	6	0.0997196	0.658673	0	0.0216378	1.73472e-18	ABC-type sugar transport systems, permease components
Lac107_00007890	359	689	307	401	0.10006	0.658979	0	0.0216378	1.73472e-18	Protein of unknown function (DUF3706).
Lac107_00043730	81	77	55	52	0.0994608	0.659096	0	0.0216378	1.73472e-18	Transcriptional regulators
Lac107_00044700	68	70	42	52	0.1004	0.659717	0	0.0216378	1.73472e-18	CDP-diacylglycerol--serine O-phosphatidyltransferase
Lac107_00002390	275	363	248	189	0.10102	0.659919	0	0.0216378	1.73472e-18	hypothetical protein
Lac107_00030240	23	39	16	23	0.0987703	0.660146	0	0.0216378	1.73472e-18	Metal-dependent hydrolase
Lac107_00045210	33	28	22	16	0.101361	0.660464	0	0.0216378	1.73472e-18	hypothetical protein
Lac107_00041440	156	222	109	150	0.102133	0.660682	0	0.0216378	1.73472e-18	START domain.
Lac107_00031580	47	48	72	69	0.101412	0.660686	0	0.0216378	1.73472e-18	Flagellar basal body L-ring protein
Lac107_00008930	97	158.5	102	73	0.0997904	0.660712	0	0.0216378	1.73472e-18	hypothetical protein
Lac107_00000220	166	110	253	149	0.102099	0.661446	0	0.0216378	1.73472e-18	hypothetical protein
Lac107_00007800	205.5	160	315	220	0.101739	0.661837	0	0.0216378	1.73472e-18	hypothetical protein
Lac107_00066430	58	81	88	115	0.102388	0.662204	0	0.0216378	1.73472e-18	Predicted transcriptional regulators
Lac107_00048730	22	25	15	13	0.0989834	0.662268	0	0.0216378	1.73472e-18	N-acetylglutamate synthase and related acetyltransferases
Lac107_00020210	2	7	6	13	0.0992956	0.663174	0	0.0216378	1.73472e-18	ABC-type nitrate/sulfonate/bicarbonate transport system, permease component
Lac107_00023540	265.5	262	170	192	0.101922	0.663279	0	0.0216378	1.73472e-18	Methyl-accepting chemotaxis protein
Lac107_00063480	25	47	19	28	0.104491	0.663471	0	0.0216378	1.73472e-18	Predicted membrane protein
Lac107_00059690	40	49	31	28	0.100224	0.664244	0	0.0216378	1.73472e-18	Permeases of the drug/metabolite transporter (DMT) superfamily
Lac107_00042810	21	35	19	16	0.102335	0.665013	0	0.0216378	1.73472e-18	Acetyltransferases, including N-acetylases of ribosomal proteins
Lac107_00056590	94	103	67	68	0.103796	0.665242	0	0.0216378	1.73472e-18	Site-specific DNA methylase
Lac107_00060270	85	87	48	69	0.103928	0.665425	0	0.0216378	1.73472e-18	Transcriptional regulator of aromatic amino acids metabolism
Lac107_00059930	192	279	151	173	0.103109	0.665602	0	0.0216378	1.73472e-18	probable addiction module antidote protein
Lac107_00052030	14	15	19	29	0.101952	0.665686	0	0.0216378	1.73472e-18	Uncharacterized protein conserved in bacteria
Lac107_00052470	199	282	125	206	0.102222	0.666867	0	0.0216378	1.73472e-18	Transcriptional regulators
Lac107_00047580	11	12	6	6	0.0987708	0.666933	0	0.0216378	1.73472e-18	Response regulator containing a CheY-like receiver domain and an HD-GYP domain
Lac107_00027840	82	64	54	45	0.103171	0.666983	0	0.0216378	1.73472e-18	Methyl-accepting chemotaxis protein
Lac107_00040770	42	58	34	32	0.102041	0.667123	0	0.0216378	1.73472e-18	Zinc metalloprotease (elastase)
Lac107_00034320	8	6	3	2	0.112855	0.667537	0	0.0216378	1.73472e-18	hypothetical protein
Lac107_00051160	209	235	116	190	0.103084	0.667892	0	0.0216378	1.73472e-18
Lac107_00038510	39	39	30	21	0.10558	0.668244	0	0.0216378	1.73472e-18	hypothetical protein
Lac107_00055340	476	752	366	464	0.104061	0.668396	0	0.0216378	1.73472e-18	acetylornithine and succinylornithine aminotransferases/succinylornithine transaminase family
Lac107_00001360	4	1	6	7	0.103477	0.668799	0.00333333	0.0277687	0.000391473	hypothetical protein
Lac107_00033230	9	9	6	3	0.0999607	0.67011	0	0.0216378	1.73472e-18	Uncharacterized conserved small protein
Lac107_00047130	86	54	55	40	0.105794	0.670189	0	0.0216378	1.73472e-18	hypothetical protein
Lac107_00009330	231	318	182	196	0.106513	0.670268	0	0.0216378	1.73472e-18	hypothetical protein
Lac107_00065790	166	272	128	174	0.104633	0.670795	0	0.0216378	1.73472e-18	hypothetical protein
Lac107_00000890	204	127	302	177	0.105161	0.671322	0	0.0216378	1.73472e-18	hypothetical protein
Lac107_00030750	78	110	47	82	0.104066	0.671745	0	0.0216378	1.73472e-18	maleylacetoacetate isomerase
Lac107_00008710	178	329	162	189	0.106178	0.672248	0	0.0216378	1.73472e-18	ADP-ribose pyrophosphatase
Lac107_00056730	135	121.5	91	86	0.103532	0.672369	0	0.0216378	1.73472e-18	Response regulator containing a CheY-like receiver domain and an HTH DNA-binding domain
Lac107_00052990	283	444	228	271	0.107068	0.672465	0	0.0216378	1.73472e-18	hypothetical protein
Lac107_00064460	136	158	106	97	0.106878	0.672655	0	0.0216378	1.73472e-18	replicative DNA helicase
Lac107_00056530	136	203	114	120	0.105853	0.672722	0	0.0216378	1.73472e-18	hypothetical protein
Lac107_00026670	47	52	37	29	0.108293	0.672835	0	0.0216378	1.73472e-18	Probable taurine catabolism dioxygenase
Lac107_00018080	77	98	53	66	0.103561	0.672998	0	0.0216378	1.73472e-18	Predicted Rossmann fold nucleotide-binding protein
Lac107_00050600	49	56	29	40	0.107026	0.673373	0	0.0216378	1.73472e-18	Small-conductance mechanosensitive channel
Lac107_00050260-scaffold00042_165429	9	8	16	14	0.103426	0.67499	0	0.0216378	1.73472e-18	hypothetical protein
Lac107_00030610	8	24	10	8	0.106303	0.675188	0	0.0216378	1.73472e-18	hypothetical protein
Lac107_00030140	48	60	26	46	0.107421	0.675917	0	0.0216378	1.73472e-18	Predicted dehydrogenases and related proteins
Lac107_00000780	142	198	117	118	0.107316	0.676881	0	0.0216378	1.73472e-18	Type II secretory pathway, prepilin signal peptidase PulO and related peptidases
Lac107_00010810	79	39	108	63	0.110382	0.677578	0	0.0216378	1.73472e-18	hypothetical protein
Lac107_00051610	13	12	22	20	0.107894	0.677613	0	0.0216378	1.73472e-18	hypothetical protein
Lac107_00027270	12	5	15	17	0.109696	0.677626	0	0.0216378	1.73472e-18	hypothetical protein
Lac107_00013650	18	9	21	25	0.10836	0.67804	0.00333333	0.0277687	0.000391473	Predicted thioesterase
Lac107_00055710	52	73	40	45	0.108258	0.67805	0	0.0216378	1.73472e-18	Transcriptional regulators
Lac107_00005690	1147	740	1746	1098	0.10869	0.678152	0	0.0216378	1.73472e-18	Type II secretory pathway, component HofQ
Lac107_00053810	91	127	69	82	0.108424	0.678675	0	0.0216378	1.73472e-18	Outer membrane protein and related peptidoglycan-associated (lipo)proteins
Lac107_00048060	231	217	150	159	0.110413	0.679031	0	0.0216378	1.73472e-18	cytochrome o ubiquinol oxidase subunit IV
Lac107_00007960	103	174	108	84	0.108395	0.679089	0	0.0216378	1.73472e-18	hypothetical protein
Lac107_00015800	14	20	32	23	0.111302	0.679555	0	0.0216378	1.73472e-18	branched-chain amino acid aminotransferase, group I
Lac107_00043920	8	6	14	11	0.108735	0.679715	0	0.0216378	1.73472e-18	ADP-ribose pyrophosphatase
Lac107_00050350	19	75	10	52	0.108483	0.680038	0	0.0216378	1.73472e-18	Urease accessory protein UreE
Lac107_00005430	27	45.5	34	13	0.109281	0.680472	0	0.0216378	1.73472e-18	hypothetical protein
Lac107_00066130	6	9	4	2	0.114024	0.680619	0	0.0216378	1.73472e-18	hypothetical protein
Lac107_00049870-scaffold00074_59272	385	554	357	286	0.109095	0.681956	0	0.0216378	1.73472e-18	hypothetical protein
Lac107_00033580	135	144	82	111	0.11231	0.682928	0	0.0216378	1.73472e-18	Pyrroloquinoline quinone (Coenzyme PQQ) biosynthesis protein C
Lac107_00067540	27	37	19	22	0.111553	0.684007	0	0.0216378	1.73472e-18	Abi-like protein.
Lac107_00007920	422	772	349	465	0.113307	0.684116	0	0.0216378	1.73472e-18	Citrate lyase beta subunit
Lac107_00055270	263	407	216	246	0.110042	0.684242	0	0.0216378	1.73472e-18	acetate--CoA ligase
Lac107_00008830	117	137	106	70	0.113155	0.684607	0	0.0216378	1.73472e-18	hypothetical protein
Lac107_00047330	880	1206	628	772	0.111671	0.684755	0	0.0216378	1.73472e-18	succinate-semialdehyde dehydrogenase
Lac107_00003410	114	169	106	91	0.111301	0.6848	0	0.0216378	1.73472e-18	hypothetical protein
Lac107_00066960	19	19	12	10	0.111318	0.684888	0	0.0216378	1.73472e-18	Methyl-accepting chemotaxis protein
Lac107_00021460	17	24	11	14	0.113799	0.684978	0	0.0216378	1.73472e-18	Transcriptional regulators
Lac107_00051450	38	38	22	28	0.112598	0.68514	0	0.0216378	1.73472e-18	Predicted esterase
Lac107_00067770	27	20	11	18	0.111041	0.685401	0	0.0216378	1.73472e-18	hypothetical protein
Lac107_00046330	117.5	96	82	66	0.113524	0.685851	0	0.0216378	1.73472e-18	Integral membrane protein possibly involved in chromosome condensation
Lac107_00026980	3	2	6	7	0.113495	0.686299	0.00666667	0.0333799	0.00130266	ABC-type spermidine/putrescine transport system, permease component II
Lac107_00001860	105	75	167	91	0.11535	0.686447	0	0.0216378	1.73472e-18	hypothetical protein
Lac107_00001320	133	90	186	133	0.114656	0.687272	0	0.0216378	1.73472e-18	Cation/multidrug efflux pump
Lac107_00017920	45	62	30	43	0.113536	0.68743	0	0.0216378	1.73472e-18	Transcriptional regulator
Lac107_00020330	21	27	15	15	0.113771	0.687564	0	0.0216378	1.73472e-18	Predicted xylanase/chitin deacetylase
Lac107_00024630	324.5	483	215	341	0.113618	0.687852	0	0.0216378	1.73472e-18	Phospholipase/lecithinase/hemolysin
Lac107_00002510	28	25	45	34	0.113716	0.688501	0	0.0216378	1.73472e-18	hypothetical protein
Lac107_00010320	299	433	277	230	0.113602	0.688676	0	0.0216378	1.73472e-18	ADP-ribose pyrophosphatase
Lac107_00043560	28	38	28	15	0.116587	0.688947	0	0.0216378	1.73472e-18	hypothetical protein
Lac107_00025800	188	221	132	152	0.1136	0.689204	0	0.0216378	1.73472e-18	choline dehydrogenase
Lac107_00045450	12	20	23	29	0.114602	0.689886	0	0.0216378	1.73472e-18	DNA replication protein
Lac107_00066510	9	4	4	1	0.113394	0.690049	0	0.0216378	1.73472e-18	hypothetical protein
Lac107_00055990	77	60	59	35	0.114205	0.690417	0	0.0216378	1.73472e-18	exodeoxyribonuclease V, alpha subunit
Lac107_00062160	105	83	76	53	0.113566	0.690518	0	0.0216378	1.73472e-18	Methyl-accepting chemotaxis protein
Lac107_00005020	141	109	117	57	0.11703	0.690606	0	0.0216378	1.73472e-18	hypothetical protein
Lac107_00010950	56	42	85	56	0.109814	0.690767	0	0.0216378	1.73472e-18	hypothetical protein
Lac107_00006350	298	435	224	283	0.115665	0.690955	0	0.0216378	1.73472e-18	hypothetical protein
Lac107_00061250	84	76	56	55	0.112626	0.691281	0	0.0216378	1.73472e-18	Predicted permease, DMT superfamily
Lac107_00055280	338.5	510	233	353	0.115735	0.691308	0	0.0216378	1.73472e-18	lysine-arginine-ornithine-binding periplasmic protein
Lac107_00066590	111	118	80	79	0.11453	0.691433	0	0.0216378	1.73472e-18	hypothetical protein
Lac107_00014920	8	9	4	4	0.11551	0.69147	0	0.0216378	1.73472e-18	Protein involved in biosynthesis of mitomycin antibiotics/polyketide fumonisin
Lac107_00025960	35	40	25	24	0.115691	0.691551	0	0.0216378	1.73472e-18	Predicted Zn-dependent peptidases
Lac107_00043290	190	343	161	210	0.11686	0.692105	0	0.0216378	1.73472e-18	tRNA-N(6)-(isopentenyl)adenosine-37 thiotransferase enzyme MiaB
Lac107_00029200	237	210	163	148	0.115701	0.692119	0	0.0216378	1.73472e-18	hypothetical protein
Lac107_00023920	39	51	22	38	0.117211	0.692677	0	0.0216378	1.73472e-18	tryptophan synthase, alpha subunit
Lac107_00041350	181	363	141	238	0.117807	0.692826	0	0.0216378	1.73472e-18	Dehydrogenases (flavoproteins)
Lac107_00026360	221	278	162	186	0.116208	0.692836	0	0.0216378	1.73472e-18	Gluconolactonase
Lac107_00038800	714	1010	506.5	664	0.116679	0.693047	0	0.0216378	1.73472e-18	Uncharacterized conserved protein
Lac107_00030420	93	101	63	71	0.117939	0.693116	0	0.0216378	1.73472e-18	Uncharacterized Fe-S protein
Lac107_00067710	6	5	10	12	0.114748	0.693231	0	0.0216378	1.73472e-18	hypothetical protein
Lac107_00010400	17	26	11	15	0.115793	0.693263	0	0.0216378	1.73472e-18
Lac107_00033140	113	117	89	73	0.114523	0.69366	0	0.0216378	1.73472e-18	methionine-R-sulfoxide reductase
Lac107_00050030	1	3	3	8	0.111539	0.693683	0	0.0216378	1.73472e-18	hypothetical protein
Lac107_00006540	59	28.5	98	30	0.117919	0.693684	0	0.0216378	1.73472e-18	Predicted endonuclease distantly related to archaeal Holliday junction resolvase and Mrr-like restriction enzymes
Lac107_00014620	80	87	46	69	0.118241	0.693722	0	0.0216378	1.73472e-18	Disulfide bond chaperones of the HSP33 family
Lac107_00064430	4	3	8	7	0.116059	0.693886	0	0.0216378	1.73472e-18	hypothetical protein
Lac107_00049100	59	64	47	37	0.116732	0.694011	0	0.0216378	1.73472e-18	Acetylornithine deacetylase/Succinyl-diaminopimelate desuccinylase and related deacylases
Lac107_00051590	14	19	19	33	0.115202	0.694033	0	0.0216378	1.73472e-18	PilZ domain.
Lac107_00032170	81.5	131	64	84	0.116398	0.694085	0	0.0216378	1.73472e-18	Predicted nucleic acid-binding protein, contains PIN domain
Lac107_00003570	140	70	176	125	0.117296	0.694113	0	0.0216378	1.73472e-18	hypothetical protein
Lac107_00028320	296	212	180	174	0.117586	0.694225	0	0.0216378	1.73472e-18	Methyl-accepting chemotaxis protein
Lac107_00000510	134	71	189	106	0.115987	0.694275	0	0.0216378	1.73472e-18	hypothetical protein
Lac107_00011520	52	74	39	47	0.11672	0.694318	0	0.0216378	1.73472e-18	hypothetical protein
Lac107_00042910	58	94	44	61	0.1186	0.69498	0	0.0216378	1.73472e-18	Esterase/lipase
Lac107_00001680	70	59	107	79	0.117831	0.695299	0	0.0216378	1.73472e-18	Glutamate synthase domain 2
Lac107_00046830	31	27	18	19	0.116474	0.695341	0	0.0216378	1.73472e-18	Glycine/D-amino acid oxidases (deaminating)
Lac107_00047670	67	89	37	71	0.119579	0.69541	0	0.0216378	1.73472e-18	Glyceraldehyde-3-phosphate dehydrogenase/erythrose-4-phosphate dehydrogenase
Lac107_00028360	119	109	94	64	0.114687	0.695607	0	0.0216378	1.73472e-18	Predicted transcriptional regulator
Lac107_00004190	157.5	270	141	159	0.119376	0.696226	0	0.0216378	1.73472e-18	hypothetical protein
Lac107_00028350	60	64	39	46	0.11785	0.696492	0	0.0216378	1.73472e-18	Transcriptional regulator
Lac107_00031820	117	89	84	59	0.117609	0.696498	0	0.0216378	1.73472e-18	FOG: HPt domain
Lac107_00021440	68	83	42	61	0.118715	0.696695	0	0.0216378	1.73472e-18	NAD-dependent aldehyde dehydrogenases
Lac107_00037000	592	712	399	498	0.118939	0.696724	0	0.0216378	1.73472e-18	F0F1-type ATP synthase, subunit a
Lac107_00001430	188	200	139	132	0.120073	0.696826	0	0.0216378	1.73472e-18	hypothetical protein
Lac107_00016940	220	209	156	144	0.118404	0.69721	0	0.0216378	1.73472e-18	Putative multicopper oxidases
Lac107_00047630	35	17	18	15	0.120865	0.697214	0	0.0216378	1.73472e-18	Heme oxygenase
Lac107_00007390	66	53	99	73	0.117924	0.69722	0	0.0216378	1.73472e-18	hypothetical protein
Lac107_00054450	989	480	1627	541	0.119652	0.697245	0	0.0216378	1.73472e-18	4-diphosphocytidyl-2C-methyl-D-erythritol kinase
Lac107_00042920	19	16	11	9	0.11715	0.697653	0	0.0216378	1.73472e-18	Uncharacterized protein conserved in bacteria
Lac107_00004630	32	26	56	29	0.121696	0.698076	0	0.0216378	1.73472e-18	hypothetical protein
Lac107_00063130	8.5	8	3	5	0.116434	0.698147	0	0.0216378	1.73472e-18	luciferase-type oxidoreductase, BA3436 family
Lac107_00045550	0	2	6	2	0.118593	0.698205	0	0.0216378	1.73472e-18	Restriction endonuclease
Lac107_00030690	103	125.5	53	108	0.120635	0.69868	0	0.0216378	1.73472e-18	fumarylacetoacetase
Lac107_00019990	5	5	15	5	0.12039	0.698764	0	0.0216378	1.73472e-18	hypothetical protein
Lac107_00061430	30	30	24	15	0.121312	0.698823	0	0.0216378	1.73472e-18	Protein of unknown function (DUF796).
Lac107_00066530	2	5	0	1	0.131157	0.700308	0	0.0216378	1.73472e-18	hypothetical protein
Lac107_00000280	80	74	108	113	0.123188	0.700693	0	0.0216378	1.73472e-18	hypothetical protein
Lac107_00062240	31	30	19	21	0.121124	0.70117	0	0.0216378	1.73472e-18	MoxR-like ATPases
Lac107_00036010-scaffold00013_64539	2	3	0	0	0.128262	0.70141	0	0.0216378	1.73472e-18	hypothetical protein
Lac107_00026940	6	16	7	5	0.125424	0.701582	0	0.0216378	1.73472e-18	Methyl-accepting chemotaxis protein
Lac107_00002960	149	92	209	137	0.122871	0.701683	0	0.0216378	1.73472e-18	hypothetical protein
Lac107_00030450	36	48	25	31	0.123652	0.701891	0	0.0216378	1.73472e-18	Response regulator containing a CheY-like receiver domain and an HTH DNA-binding domain
Lac107_00061340	16	27	7	19	0.122733	0.701907	0	0.0216378	1.73472e-18	Uncharacterized conserved protein
Lac107_00044910	181	239	122	171	0.124209	0.702564	0	0.0216378	1.73472e-18	formyltetrahydrofolate deformylase
Lac107_00013580	5	6	9	13	0.125438	0.702691	0	0.0216378	1.73472e-18	Acyl carrier protein
Lac107_00029810	51	68	34	47	0.12469	0.702857	0	0.0216378	1.73472e-18	Short chain fatty acids transporter
Lac107_00001800	121	67	191	77	0.125618	0.703095	0	0.0216378	1.73472e-18	hypothetical protein
Lac107_00037500	482.5	581	298	438	0.122793	0.704044	0	0.0216378	1.73472e-18	ribosome-binding factor A
Lac107_00022030	37	38	25	24	0.122906	0.704225	0	0.0216378	1.73472e-18	Na+/H+-dicarboxylate symporters
Lac107_00008720	334	444	263	280	0.121585	0.70427	0	0.0216378	1.73472e-18	Nuclease-related domain.
Lac107_00000810	43	75	47	34	0.124343	0.704304	0	0.0216378	1.73472e-18	hypothetical protein
Lac107_00005320	1292	2050	995	1246	0.123361	0.704367	0	0.0216378	1.73472e-18	Uncharacterized conserved protein
Lac107_00015570	69	82.5	61	45	0.124563	0.705014	0	0.0216378	1.73472e-18	Acyl-CoA synthetases (AMP-forming)/AMP-acid ligases II
Lac107_00051440	232	364	162	256	0.122683	0.705086	0	0.0216378	1.73472e-18	ABC-type amino acid transport/signal transduction systems, periplasmic component/domain
Lac107_00062140	157	178	102	134	0.122401	0.705095	0	0.0216378	1.73472e-18	NADH:flavin oxidoreductases, Old Yellow Enzyme family
Lac107_00063790	775	639	540	433	0.124914	0.70537	0	0.0216378	1.73472e-18	monothiol glutaredoxin, Grx4 family
Lac107_00054070	57	73	36	53	0.128144	0.705424	0	0.0216378	1.73472e-18	hypothetical protein
Lac107_00032130	2	4	0	1	0.131248	0.705497	0	0.0216378	1.73472e-18	cytochrome oxidase maturation protein, cbb3-type
Lac107_00031670	460	455	317.5	319	0.125331	0.705938	0	0.0216378	1.73472e-18	Uncharacterized flagellar protein FlaG
Lac107_00048200	68	106	48	73	0.125269	0.706478	0	0.0216378	1.73472e-18	Gluconolactonase
Lac107_00000940	220	285	202	154	0.123589	0.706982	0	0.0216378	1.73472e-18	hypothetical protein
Lac107_00005410	23	44	21	23	0.125274	0.707621	0	0.0216378	1.73472e-18	hypothetical protein
Lac107_00008760	157	186	104	138	0.124611	0.707644	0	0.0216378	1.73472e-18	Growth inhibitor
Lac107_00060930	3456	1703	2191	1226	0.125983	0.707719	0	0.0216378	1.73472e-18	Cold shock proteins
Lac107_00067150	2	2	0	0	0.128326	0.707782	0	0.0216378	1.73472e-18	hypothetical protein
Lac107_00038100	52	49	35	34	0.125968	0.709834	0	0.0216378	1.73472e-18	Transcriptional regulator containing an amidase domain and an AraC-type DNA-binding HTH domain
Lac107_00040970	35	35	39.5	63	0.12728	0.709852	0	0.0216378	1.73472e-18	amino acid adenylation domain
Lac107_00056540	243	302.5	185	200	0.127395	0.71003	0	0.0216378	1.73472e-18	hypothetical protein
Lac107_00059590	35	35	24	23	0.130836	0.710081	0	0.0216378	1.73472e-18	Uncharacterized conserved protein
Lac107_00057350	19	17	11	10	0.128852	0.71085	0	0.0216378	1.73472e-18	Predicted HD superfamily hydrolase
Lac107_00007450	11	9	5	5	0.129853	0.711125	0	0.0216378	1.73472e-18
Lac107_00065370	10	10	18	16	0.129596	0.711247	0.00333333	0.0277687	0.000391473	hypothetical protein
Lac107_00021860	19	21	14	10	0.126655	0.711813	0.00333333	0.0277687	0.000391473	hypothetical protein
Lac107_00032560	63	71	47	46	0.130752	0.712415	0	0.0216378	1.73472e-18	efflux transporter, outer membrane factor (OMF) lipoprotein, NodT family
Lac107_00003420	444	567	363	344	0.130306	0.712908	0	0.0216378	1.73472e-18	hypothetical protein
Lac107_00054150	32	41	23	26	0.131095	0.713226	0	0.0216378	1.73472e-18	ABC-type amino acid transport/signal transduction systems, periplasmic component/domain
Lac107_00007350	365	361	624.5	417	0.12907	0.713233	0	0.0216378	1.73472e-18	Molecular chaperone (small heat shock protein)
Lac107_00048850	8	10	4	5	0.131673	0.713238	0	0.0216378	1.73472e-18	ABC-type dipeptide/oligopeptide/nickel transport systems, permease components
Lac107_00038640	12	16	9	7	0.132719	0.71325	0	0.0216378	1.73472e-18	hypothetical protein
Lac107_00030670	259	342	164	258	0.128602	0.713267	0	0.0216378	1.73472e-18	Predicted Zn-dependent hydrolases of the beta-lactamase fold
Lac107_00005860	476	292	674	427	0.130378	0.713271	0	0.0216378	1.73472e-18	Arylsulfatase regulator (Fe-S oxidoreductase)
Lac107_00008340	189	195	175	97	0.131666	0.713283	0	0.0216378	1.73472e-18	hypothetical protein
Lac107_00044610	30	30	21	18	0.129921	0.713295	0	0.0216378	1.73472e-18	Uncharacterized low-complexity proteins
Lac107_00052900	78	97	55	67	0.12972	0.713477	0	0.0216378	1.73472e-18	hypothetical protein
Lac107_00001890	1469	935	883	753	0.129479	0.713496	0	0.0216378	1.73472e-18	hypothetical protein
Lac107_00019520	104	142	78	96	0.129391	0.713853	0	0.0216378	1.73472e-18	NTP pyrophosphohydrolases containing a Zn-finger, probably nucleic-acid-binding
Lac107_00047720	80	54	60	34	0.132011	0.713893	0	0.0216378	1.73472e-18	Signal transduction histidine kinase
Lac107_00044820	4	6	1	3	0.133787	0.713946	0	0.0216378	1.73472e-18	hypothetical protein
Lac107_00025640	4	3	1	0	0.131456	0.713992	0	0.0216378	1.73472e-18	sarcosine oxidase, delta subunit family, heterotetrameric form
Lac107_00048860	19	11	8	9	0.131778	0.714134	0	0.0216378	1.73472e-18	ABC-type dipeptide transport system, periplasmic component
Lac107_00003070	78	42	104	67	0.129061	0.714431	0	0.0216378	1.73472e-18	hypothetical protein
Lac107_00055850	25	26	22	11	0.134763	0.71447	0	0.0216378	1.73472e-18	4-aminobutyrate aminotransferase and related aminotransferases
Lac107_00008860	860	815	669	487	0.130782	0.714496	0	0.0216378	1.73472e-18	Uncharacterized protein conserved in bacteria
Lac107_00006950	233	154	324	223	0.133033	0.714608	0	0.0216378	1.73472e-18	Preprotein translocase subunit SecA (ATPase, RNA helicase)
Lac107_00037850	128	103	92	71	0.131954	0.714915	0	0.0216378	1.73472e-18	ribosomal subunit interface protein
Lac107_00001650	346.5	475	284	293	0.132266	0.714989	0	0.0216378	1.73472e-18	hypothetical protein
Lac107_00066570	65	54	40	43	0.13288	0.715092	0	0.0216378	1.73472e-18	Sulfate permease and related transporters (MFS superfamily)
Lac107_00006120	753	508	1208	623	0.130367	0.715371	0	0.0216378	1.73472e-18	hypothetical protein
Lac107_00062880	29	45	27	23	0.131868	0.715713	0	0.0216378	1.73472e-18	Uncharacterized protein conserved in bacteria
Lac107_00031490	41	47	34	26	0.131184	0.715777	0	0.0216378	1.73472e-18	Uncharacterized protein conserved in bacteria
Lac107_00037710	25	32	19	17	0.13135	0.71578	0	0.0216378	1.73472e-18	MAF protein
Lac107_00067280	19	23	13	12	0.130307	0.715801	0	0.0216378	1.73472e-18	hypothetical protein
Lac107_00001160	92	74	144	90	0.132497	0.715911	0	0.0216378	1.73472e-18	hypothetical protein
Lac107_00039840	35	39	27	23	0.131819	0.716113	0	0.0216378	1.73472e-18	ABC-type dipeptide transport system, periplasmic component
Lac107_00028740	51	61	31	46	0.132807	0.716223	0	0.0216378	1.73472e-18	ABC-type amino acid transport/signal transduction systems, periplasmic component/domain
Lac107_00035820	26	24	11	21	0.136917	0.716759	0	0.0216378	1.73472e-18	NAD/NADP transhydrogenase alpha subunit
Lac107_00009900	233	396	185	259	0.130448	0.717144	0	0.0216378	1.73472e-18	RNA polymerase sigma factor, sigma-70 family
Lac107_00001230	64	119	60	70	0.135922	0.717269	0	0.0216378	1.73472e-18	hypothetical protein
Lac107_00064800	16	15	35	14	0.133656	0.717435	0	0.0216378	1.73472e-18	hypothetical protein
Lac107_00020620	21	24	15	13	0.135009	0.718149	0	0.0216378	1.73472e-18	hypothetical protein
Lac107_00010630	311	198	414	308	0.134048	0.718165	0	0.0216378	1.73472e-18	ADP-ribosylglycohydrolase
Lac107_00011590	88	93	64	63	0.138713	0.718285	0	0.0216378	1.73472e-18	Predicted nucleoside-diphosphate-sugar epimerases
Lac107_00036260	44	47	28	33	0.13032	0.71839	0	0.0216378	1.73472e-18	Acetyltransferases
Lac107_00022380	201	172	170	97	0.131661	0.718738	0	0.0216378	1.73472e-18	N-acyl-L-homoserine lactone synthetase
Lac107_00046710	52	51	40	30	0.133401	0.718996	0	0.0216378	1.73472e-18	S-type Pyocin.
Lac107_00036690	68	71	41	56	0.132237	0.719483	0	0.0216378	1.73472e-18	adenylylsulfate kinase (apsK)
Lac107_00041470	124	237	94	162	0.135049	0.71977	0	0.0216378	1.73472e-18	succinate dehydrogenase, hydrophobic membrane anchor protein
Lac107_00033360	33.5	22	23	12	0.132561	0.719912	0	0.0216378	1.73472e-18	hypothetical protein
Lac107_00032160	95	125	77	79	0.134886	0.720106	0	0.0216378	1.73472e-18	cytochrome c oxidase accessory protein FixG
Lac107_00055950	98	140	84	85	0.135744	0.720631	0	0.0216378	1.73472e-18	Heme oxygenase
Lac107_00053070	6318.5	7613	4905	4076	0.134944	0.720663	0	0.0216378	1.73472e-18	hypothetical protein
Lac107_00038420	47	39	56	68	0.134569	0.720888	0	0.0216378	1.73472e-18	ATP:cob(I)alamin adenosyltransferase
Lac107_00010160	100	79	163	89	0.139624	0.720939	0	0.0216378	1.73472e-18	hypothetical protein
Lac107_00038830	132	191	104	126	0.137865	0.721348	0	0.0216378	1.73472e-18	Membrane-bound metallopeptidase
Lac107_00011960	76	126	63	81	0.134907	0.721558	0	0.0216378	1.73472e-18	ABC-type branched-chain amino acid transport systems, periplasmic component
Lac107_00068480	5	12	3	5	0.135398	0.721647	0	0.0216378	1.73472e-18	hypothetical protein
Lac107_00042980	36	39	24	26	0.132614	0.721676	0	0.0216378	1.73472e-18	Response regulator containing a CheY-like receiver domain and an HTH DNA-binding domain
Lac107_00019740	93	131	55	103	0.135354	0.722026	0	0.0216378	1.73472e-18	Isopropylmalate/homocitrate/citramalate synthases
Lac107_00054790	15	32	13	17	0.138588	0.722126	0	0.0216378	1.73472e-18	Predicted membrane protein
Lac107_00043870	12	12	7	6	0.139024	0.72215	0	0.0216378	1.73472e-18	Ribose/xylose/arabinose/galactoside ABC-type transport systems, permease components
Lac107_00036830	29	43	19	29	0.137581	0.722398	0	0.0216378	1.73472e-18	sucrose-6-phosphate hydrolase
Lac107_00007900	381	674.5	335	408	0.13807	0.722669	0	0.0216378	1.73472e-18	hypothetical protein
Lac107_00008140	64.5	46	48	29	0.133322	0.722911	0	0.0216378	1.73472e-18	hypothetical protein
Lac107_00042990	8	6	3	4	0.136802	0.72293	0	0.0216378	1.73472e-18	Flp pilus assembly protein, protease CpaA
Lac107_00065530	227	229	300	342	0.137775	0.722977	0	0.0216378	1.73472e-18	GDP-mannose 4,6-dehydratase
Lac107_00000250	518	1023	443.5	631	0.136343	0.723105	0	0.0216378	1.73472e-18	hypothetical protein
Lac107_00014940	4	3	5	10	0.136656	0.723148	0	0.0216378	1.73472e-18	Ribulose-5-phosphate 4-epimerase and related epimerases and aldolases
Lac107_00045300	28	20	16	15	0.13842	0.723417	0	0.0216378	1.73472e-18	Uncharacterized protein conserved in bacteria
Lac107_00060280	170	138	109	110	0.138424	0.7235	0	0.0216378	1.73472e-18	phenylalanine-4-hydroxylase, monomeric form
Lac107_00025990-scaffold00009_158619	78.5	71.5	47	58	0.13113	0.723587	0	0.0216378	1.73472e-18	hypothetical protein
Lac107_00019330	99	92	59	77	0.138613	0.723812	0	0.0216378	1.73472e-18	D-xylulose kinase
Lac107_00056980	41	47	26	34	0.137412	0.72412	0	0.0216378	1.73472e-18	Transcriptional regulators
Lac107_00024720	54	50	78	71	0.137287	0.724192	0	0.0216378	1.73472e-18	PAS domain S-box
Lac107_00006820	3	4	1	1	0.131618	0.725561	0	0.0216378	1.73472e-18	hypothetical protein
Lac107_00041360	254	324	175	236	0.138922	0.726058	0	0.0216378	1.73472e-18	Electron transfer flavoprotein, beta subunit
Lac107_00027880	86	71	59	51	0.141607	0.726377	0	0.0216378	1.73472e-18	Putative translation initiation inhibitor, yjgF family
Lac107_00044350	326	282	208	224	0.140749	0.726869	0	0.0216378	1.73472e-18	Protein of unknown function (DUF1631).
Lac107_00055030	64	81	54	48	0.140057	0.72697	0	0.0216378	1.73472e-18	peptide deformylase
Lac107_00011570	12	13	5	8	0.138684	0.727608	0	0.0216378	1.73472e-18	Acyl dehydratase
Lac107_00021090	43	77	44	40	0.141837	0.728254	0	0.0216378	1.73472e-18	hypothetical protein
Lac107_00027070	12	14	7	7	0.141996	0.728303	0	0.0216378	1.73472e-18	hypothetical protein
Lac107_00008510	39	20	42	45	0.142839	0.72831	0	0.0216378	1.73472e-18	hypothetical protein
Lac107_00053130	123	161	95	108	0.141574	0.728795	0	0.0216378	1.73472e-18	hypothetical protein
Lac107_00051920	29	53.5	25	31	0.142055	0.729422	0	0.0216378	1.73472e-18	Uncharacterized protein conserved in bacteria
Lac107_00043530	17.5	38	14	21	0.140965	0.729427	0	0.0216378	1.73472e-18	hypothetical protein
Lac107_00061210	35	58	22	42	0.140419	0.729777	0	0.0216378	1.73472e-18	Shikimate 5-dehydrogenase
Lac107_00063780	122	106	83	80	0.141506	0.72984	0	0.0216378	1.73472e-18	Anaerobic dehydrogenases, typically selenocysteine-containing
Lac107_00015770	6	11	4	4	0.134889	0.730274	0	0.0216378	1.73472e-18	Stress responsive A/B Barrel Domain.
Lac107_00063870	10	11	8	3	0.142758	0.730454	0	0.0216378	1.73472e-18	hypothetical protein
Lac107_00062230	55	80	50	43	0.14212	0.731022	0	0.0216378	1.73472e-18	hypothetical protein
Lac107_00001870	61.5	39	94	49	0.143342	0.731116	0	0.0216378	1.73472e-18	hypothetical protein
Lac107_00060320	104.5	99	80	65	0.142754	0.731264	0	0.0216378	1.73472e-18	Arabinose efflux permease
Lac107_00032670	11	12	7	5	0.143514	0.73194	0	0.0216378	1.73472e-18	hypothetical protein
Lac107_00045900	74	134	56	91	0.143162	0.732276	0	0.0216378	1.73472e-18	Transcriptional regulators
Lac107_00018790	21	20	15	11	0.143067	0.732555	0	0.0216378	1.73472e-18	Type III secretory pathway, component EscU
Lac107_00010710	118	223	120	125	0.145538	0.733455	0	0.0216378	1.73472e-18	Stringent starvation protein B
Lac107_00008950	77	111	72	62	0.143721	0.733472	0	0.0216378	1.73472e-18	Predicted Fe-S-cluster oxidoreductase
Lac107_00040540	16	18	14	6	0.141428	0.73351	0	0.0216378	1.73472e-18	Transcriptional regulators
Lac107_00010780	51	33	73	47	0.146252	0.73401	0	0.0216378	1.73472e-18	hypothetical protein
Lac107_00029950	50	65	33	47	0.145097	0.734228	0	0.0216378	1.73472e-18	Permeases of the drug/metabolite transporter (DMT) superfamily
Lac107_00020880	4	6	1	2	0.158513	0.734935	0	0.0216378	1.73472e-18	hypothetical protein
Lac107_00030120	120	146	82	109	0.143435	0.735246	0	0.0216378	1.73472e-18	Predicted dehydrogenases and related proteins
Lac107_00062720	138.5	127	104	86	0.143911	0.735414	0	0.0216378	1.73472e-18	Uncharacterized protein conserved in bacteria
Lac107_00033680	53	49	28	43	0.143162	0.736592	0	0.0216378	1.73472e-18	Predicted permeases
Lac107_00025670	12	15	5	10	0.145125	0.736744	0	0.0216378	1.73472e-18	formyltetrahydrofolate deformylase
Lac107_00053400	29	35	47	46	0.145792	0.737015	0	0.0216378	1.73472e-18	Type IV secretory pathway, component VirB8
Lac107_00007190	205	156	283	222	0.144225	0.737167	0	0.0216378	1.73472e-18	hypothetical protein
Lac107_00058960	14	16	12	5	0.144916	0.737193	0	0.0216378	1.73472e-18	Uncharacterized protein conserved in bacteria
Lac107_00016490	20	10	5	12	0.147676	0.737563	0	0.0216378	1.73472e-18	hypothetical protein
Lac107_00045700	27	19	36	32	0.147293	0.73775	0	0.0216378	1.73472e-18	phage tail tape measure protein, lambda family
Lac107_00011360	77	91	47	73	0.148928	0.73835	0	0.0216378	1.73472e-18	drug resistance transporter, Bcr/CflA subfamily
Lac107_00014660	75	85	58	55	0.143362	0.738484	0	0.0216378	1.73472e-18	alpha-L-glutamate ligases, RimK family
Lac107_00018180	13	12	7	7	0.152256	0.738792	0	0.0216378	1.73472e-18	Acetyltransferases
Lac107_00060020	7	12	8	2	0.15274	0.739083	0	0.0216378	1.73472e-18	hypothetical protein
Lac107_00006430	1137	691	1759	885	0.148856	0.739205	0	0.0216378	1.73472e-18	hypothetical protein
Lac107_00002250	269.5	435	227	277	0.149538	0.739206	0	0.0216378	1.73472e-18	hypothetical protein
Lac107_00055100	28	38	26	18	0.143534	0.739387	0	0.0216378	1.73472e-18	hypothetical protein
Lac107_00036120	150	213	112	149	0.146646	0.739493	0	0.0216378	1.73472e-18	Uncharacterized enzymes related to aldose 1-epimerase
Lac107_00035610	477	558	360	374	0.149025	0.739523	0	0.0216378	1.73472e-18	DNA-directed RNA polymerase, omega subunit
Lac107_00037630-scaffold00009_158619	1629	1727.5	1265	1039	0.146964	0.739552	0	0.0216378	1.73472e-18	hypothetical protein
Lac107_00011350	116	177	68	142	0.144629	0.740374	0	0.0216378	1.73472e-18	zinc-binding alcohol dehydrogenase family protein
Lac107_00050870	2139.5	2846	1490	1894	0.149068	0.740495	0	0.0216378	1.73472e-18
Lac107_00001420	16	13	20	25	0.148085	0.740714	0	0.0216378	1.73472e-18	hypothetical protein
Lac107_00053360	61	67	72	107	0.149357	0.741252	0	0.0216378	1.73472e-18	hypothetical protein
Lac107_00045960	31	46	27	26	0.150967	0.741449	0	0.0216378	1.73472e-18	General secretion pathway protein M.
Lac107_00036670	4	5	2	1	0.15864	0.741567	0	0.0216378	1.73472e-18	hypothetical protein
Lac107_00061380	7	5	3	2	0.160774	0.741685	0	0.0216378	1.73472e-18	Response regulator containing CheY-like receiver, AAA-type ATPase, and DNA-binding domains
Lac107_00019600	110	142	74	106	0.149124	0.741695	0	0.0216378	1.73472e-18	Uncharacterized protein conserved in bacteria
Lac107_00058760	87	73	67	46	0.149099	0.741831	0	0.0216378	1.73472e-18	DNA repair protein RecO
Lac107_00066250	38	39	33	20	0.151133	0.741841	0	0.0216378	1.73472e-18	Peptidase propeptide and YPEB domain.
Lac107_00016660	618	789	469	522	0.148494	0.742248	0	0.0216378	1.73472e-18	FeS cluster assembly scaffold IscU
Lac107_00036240	37	28	20	24	0.149482	0.742257	0	0.0216378	1.73472e-18	Transcriptional regulators containing a DNA-binding HTH domain and an aminotransferase domain (MocR family) and their eukaryotic orthologs
Lac107_00004540	130	120	109	70	0.149662	0.742541	0	0.0216378	1.73472e-18	hypothetical protein
Lac107_00023260	52	28	28	26	0.150663	0.742803	0	0.0216378	1.73472e-18	ABC-type uncharacterized transport system, permease component
Lac107_00042120	11	22	9	11	0.149206	0.743015	0	0.0216378	1.73472e-18	hypothetical protein
Lac107_00013430	28	36	23	20	0.148775	0.743126	0	0.0216378	1.73472e-18	Transcriptional regulator
Lac107_00003110	22	16	29	28	0.149729	0.743223	0	0.0216378	1.73472e-18	hypothetical protein
Lac107_00025340	77	58	51.5	44	0.149157	0.743254	0	0.0216378	1.73472e-18	Predicted hydrolases or acyltransferases (alpha/beta hydrolase superfamily)
Lac107_00066140	69	77	46	58	0.148509	0.743322	0	0.0216378	1.73472e-18	outer membrane autotransporter barrel domain
Lac107_00022460	21	36	22	16	0.15301	0.74343	0	0.0216378	1.73472e-18	ABC-type multidrug transport system, ATPase component
Lac107_00040500	54	80	41	54	0.147685	0.743479	0	0.0216378	1.73472e-18	cobalt transporter subunit CbtA (proposed)
Lac107_00064310	4	7	2	2	0.158639	0.743531	0	0.0216378	1.73472e-18	hypothetical protein
Lac107_00047210	12	17	30	16	0.154003	0.743919	0	0.0216378	1.73472e-18	hypothetical protein
Lac107_00047920	18	24	13	14	0.151405	0.74417	0	0.0216378	1.73472e-18	P pilus assembly protein, pilin FimA
Lac107_00007910	566	1178	516	709	0.150663	0.744231	0	0.0216378	1.73472e-18	Protein of unknown function (DUF2983).
Lac107_00059920	90	149	79	93	0.151815	0.744876	0	0.0216378	1.73472e-18	Uncharacterized protein conserved in bacteria
Lac107_00055210	6	8	4	2	0.158872	0.74488	0	0.0216378	1.73472e-18	Putative NADPH-quinone reductase (modulator of drug activity B)
Lac107_00013980	174	189	106	156	0.1526	0.745192	0	0.0216378	1.73472e-18	Micrococcal nuclease (thermonuclease) homologs
Lac107_00008020	667	373	958	514	0.151289	0.745489	0	0.0216378	1.73472e-18	hypothetical protein
Lac107_00036140	78	86	54	62	0.153424	0.745808	0	0.0216378	1.73472e-18	Predicted membrane protein
Lac107_00018010	663	162	974	186	0.153163	0.745898	0	0.0216378	1.73472e-18
Lac107_00032980	68	66	40	55	0.154086	0.746563	0	0.0216378	1.73472e-18	Transcriptional regulator
Lac107_00010680	120	262	112	164	0.154358	0.746893	0	0.0216378	1.73472e-18	NAD+ synthetase
Lac107_00065800	162	263	143	163	0.153352	0.747617	0	0.0216378	1.73472e-18	Site-specific recombinases, DNA invertase Pin homologs
Lac107_00045120	34	47	28	27	0.154291	0.747673	0	0.0216378	1.73472e-18	Arabinose efflux permease
Lac107_00005310	79	152	90	76	0.151411	0.747718	0	0.0216378	1.73472e-18	hypothetical protein
Lac107_00052070	38	53	28	35	0.154114	0.747756	0	0.0216378	1.73472e-18	Uncharacterized protein conserved in bacteria
Lac107_00018820	13	11	5	8	0.152751	0.747918	0	0.0216378	1.73472e-18	Uncharacterized membrane-anchored protein conserved in bacteria
Lac107_00040380	133	142	86	112	0.152529	0.748063	0	0.0216378	1.73472e-18	undecaprenyl-diphosphatase UppP
Lac107_00005380	243	427	214	267	0.155344	0.748596	0	0.0216378	1.73472e-18	hypothetical protein
Lac107_00036650	9	5	5	2	0.158734	0.748627	0	0.0216378	1.73472e-18	hypothetical protein
Lac107_00016830	554	487	394	349	0.155608	0.748743	0	0.0216378	1.73472e-18	hypothetical protein
Lac107_00041430	69	112	56	73	0.150581	0.748915	0	0.0216378	1.73472e-18	Predicted Fe-S-cluster oxidoreductase
Lac107_00029530	137	210	99	152	0.153124	0.749324	0	0.0216378	1.73472e-18	Transaldolase
Lac107_00064020	41	46	33	28	0.156879	0.749623	0	0.0216378	1.73472e-18	Uncharacterized conserved protein
Lac107_00022420	68	69	37	60	0.153357	0.749706	0	0.0216378	1.73472e-18	Pirin-related protein
Lac107_00032050	302	272	226	188	0.154724	0.750018	0	0.0216378	1.73472e-18	Chemotaxis signal transduction protein
Lac107_00033380	26	19	32	35	0.156871	0.750211	0	0.0216378	1.73472e-18	Transcriptional regulator
Lac107_00061310	56	69	39	50	0.154292	0.750244	0	0.0216378	1.73472e-18	Transcriptional regulator
Lac107_00006160	405	352	277	265	0.155346	0.750423	0	0.0216378	1.73472e-18	Protein involved in initiation of plasmid replication
Lac107_00006440	47	44	67	62	0.155389	0.750431	0	0.0216378	1.73472e-18	hypothetical protein
Lac107_00032690-scaffold00013_64539	6	5	1	3	0.162092	0.750841	0	0.0216378	1.73472e-18	hypothetical protein
Lac107_00007170	142	153	119	94	0.15305	0.750999	0	0.0216378	1.73472e-18	hypothetical protein
Lac107_00010570	262	344	253	183	0.154887	0.751045	0	0.0216378	1.73472e-18	hypothetical protein
Lac107_00047940	31	32	25	18	0.155809	0.751051	0	0.0216378	1.73472e-18	P pilus assembly protein, porin PapC
Lac107_00055290	171	204	115	156	0.156223	0.751669	0	0.0216378	1.73472e-18	amine acid ABC transporter, permease protein, 3-TM region, His/Glu/Gln/Arg/opine family
Lac107_00040790	35	45	21	34	0.154434	0.751756	0	0.0216378	1.73472e-18	Uncharacterized paraquat-inducible protein A
Lac107_00061960	454	433.5	314	322	0.158988	0.752158	0	0.0216378	1.73472e-18	PAS domain S-box
Lac107_00056990	45	51	61	74	0.159743	0.752229	0	0.0216378	1.73472e-18	Cysteine protease
Lac107_00024320	93	97	57	80	0.159753	0.752355	0	0.0216378	1.73472e-18	hypothetical protein
Lac107_00044760	46	52	32	36	0.156307	0.752362	0	0.0216378	1.73472e-18	2-polyprenylphenol hydroxylase and related flavodoxin oxidoreductases
Lac107_00010200	213	124	302	166	0.156861	0.752575	0	0.0216378	1.73472e-18	hypothetical protein
Lac107_00048260	2	6	3	0	0.158977	0.752877	0	0.0216378	1.73472e-18	Protein of unknown function (DUF3225).
Lac107_00054220	176	210	130	150	0.157306	0.753326	0	0.0216378	1.73472e-18	ferrochelatase
Lac107_00045110	11	13	9	4	0.154915	0.753708	0	0.0216378	1.73472e-18	hypothetical protein
Lac107_00050800	315.5	486	282	294	0.158791	0.7538	0	0.0216378	1.73472e-18	bacterioferritin
Lac107_00036170	37	40	18	34	0.156493	0.75397	0	0.0216378	1.73472e-18	hypothetical protein
Lac107_00021110	37	67	35	37	0.157246	0.75412	0	0.0216378	1.73472e-18	PAS domain S-box
Lac107_00002500	152.5	158	122	103	0.157529	0.754368	0	0.0216378	1.73472e-18	hypothetical protein
Lac107_00017610	242	294	189	199	0.158877	0.754462	0	0.0216378	1.73472e-18	transcriptional regulator, Spx/MgsR family
Lac107_00051380	24	28	17	17	0.160857	0.75508	0	0.0216378	1.73472e-18	Predicted transcriptional regulators
Lac107_00036470	26	29	17	20	0.16059	0.755294	0	0.0216378	1.73472e-18	Phosphatidylserine/phosphatidylglycerophosphate/cardiolipin synthases and related enzymes
Lac107_00044110	158.5	178	108	136	0.159021	0.755576	0	0.0216378	1.73472e-18	dephospho-CoA kinase
Lac107_00059100	6	5	3	2	0.162783	0.755663	0	0.0216378	1.73472e-18	hypothetical protein
Lac107_00000740	251	356	230	208	0.158722	0.755805	0	0.0216378	1.73472e-18	hypothetical protein
Lac107_00035730	17	24	14	12	0.160258	0.756084	0	0.0216378	1.73472e-18	citrate transporter, CitMHS family
Lac107_00010600	566	787	483.5	479	0.161886	0.756299	0	0.0216378	1.73472e-18	DNA topoisomerase VI, subunit A
Lac107_00022840	113	123	81	89	0.158117	0.756333	0	0.0216378	1.73472e-18	Uncharacterized protein conserved in bacteria
Lac107_00065960	18	18	11	11	0.158629	0.756573	0	0.0216378	1.73472e-18	Phosphoglycerate dehydrogenase and related dehydrogenases
Lac107_00046020	76	84	47	69	0.163182	0.756583	0	0.0216378	1.73472e-18	general secretion pathway protein G
Lac107_00065300	356	440	252	320	0.162613	0.757097	0	0.0216378	1.73472e-18	Predicted Zn peptidase
Lac107_00017290	377.5	336	257	256	0.160768	0.757162	0	0.0216378	1.73472e-18	Methyl-accepting chemotaxis protein
Lac107_00023910	65	85	39	68	0.160427	0.757287	0	0.0216378	1.73472e-18	tryptophan synthase, beta subunit
Lac107_00005340	69	107	58.5	68	0.16143	0.757613	0	0.0216378	1.73472e-18	hypothetical protein
Lac107_00006610	431	271	627.5	350	0.161978	0.757804	0	0.0216378	1.73472e-18	hypothetical protein
Lac107_00052860	13	27	8	17	0.161337	0.757928	0	0.0216378	1.73472e-18	K+-transporting ATPase, KdpA
Lac107_00019580	37	49	34	25	0.159021	0.758024	0	0.0216378	1.73472e-18	Fructose-2,6-bisphosphatase
Lac107_00011030	902	542	1287	753	0.163555	0.758703	0	0.0216378	1.73472e-18	helicase, putative, RecD/TraA family
Lac107_00001750	176	73	225	118	0.162468	0.758726	0	0.0216378	1.73472e-18	hypothetical protein
Lac107_00003090	601	456	781	701	0.163828	0.759113	0	0.0216378	1.73472e-18	DNA topoisomerase IV, A subunit, proteobacterial
Lac107_00044850	89	109	75	68	0.164608	0.759587	0	0.0216378	1.73472e-18	hypothetical protein
Lac107_00058750	191	216	142	154	0.161421	0.759654	0	0.0216378	1.73472e-18	pyridoxine 5''-phosphate synthase
Lac107_00022200	22	37	13	27	0.161778	0.75969	0	0.0216378	1.73472e-18	ABC-type Fe3+ transport system, periplasmic component
Lac107_00045800	54	87	52	49	0.163495	0.759744	0	0.0216378	1.73472e-18	Formate/nitrite family of transporters
Lac107_00055500	121	152	84	114	0.160872	0.760619	0	0.0216378	1.73472e-18	Arc-like DNA binding domain.
Lac107_00048000	20	20	15	10	0.15971	0.761553	0	0.0216378	1.73472e-18	Acetyltransferases
Lac107_00009750	16	15	12	6	0.168232	0.761683	0	0.0216378	1.73472e-18
Lac107_00037090	143	157	98	120	0.16503	0.761793	0	0.0216378	1.73472e-18	ribonuclease P protein component, eubacterial
Lac107_00031200	9	12	7	4	0.162463	0.762149	0	0.0216378	1.73472e-18	Na+/proline symporter
Lac107_00063040	22	22	15	14	0.163698	0.762176	0	0.0216378	1.73472e-18	Type II secretory pathway, component PulK
Lac107_00057770	64	53	43	39	0.165307	0.762305	0	0.0216378	1.73472e-18	Predicted permease, DMT superfamily
Lac107_00060950	38	41	25	30	0.162736	0.762634	0	0.0216378	1.73472e-18	hypothetical protein
Lac107_00067940	7	4	15	5	0.16304	0.76314	0.00333333	0.0277687	0.000391473	hypothetical protein
Lac107_00030650	79.5	97	68	60	0.162779	0.763217	0	0.0216378	1.73472e-18	Transcriptional regulator
Lac107_00011250	33	41	25	27	0.165749	0.763405	0	0.0216378	1.73472e-18	Ca2+/H+ antiporter
Lac107_00055070	68	81	45	63	0.165799	0.763562	0	0.0216378	1.73472e-18	Predicted membrane protein
Lac107_00066890	49	73	46	40	0.163414	0.763763	0	0.0216378	1.73472e-18	hypothetical protein
Lac107_00029590	58	62	38	47	0.165549	0.763811	0	0.0216378	1.73472e-18	hypothetical protein
Lac107_00002060	351	522	290	339	0.165706	0.76409	0	0.0216378	1.73472e-18	hypothetical protein
Lac107_00018050	37	49	27	33	0.166305	0.764207	0	0.0216378	1.73472e-18	competence/damage-inducible protein CinA C-terminal domain
Lac107_00013690	20	16	26	27	0.167824	0.764258	0	0.0216378	1.73472e-18	Methylase involved in ubiquinone/menaquinone biosynthesis
Lac107_00022060	22	21	20	43	0.171385	0.764304	0	0.0216378	1.73472e-18	hypothetical protein
Lac107_00011210	3	3	7	6	0.163053	0.764378	0	0.0216378	1.73472e-18	ABC-type uncharacterized transport system, permease component
Lac107_00041740	94	109	81	67	0.167566	0.764458	0	0.0216378	1.73472e-18	hypothetical protein
Lac107_00023700	36	19	17	19	0.16504	0.764476	0	0.0216378	1.73472e-18	TIGR02444 family protein
Lac107_00051760	41	42	21	37	0.162273	0.765217	0	0.0216378	1.73472e-18	Lactate dehydrogenase and related dehydrogenases
Lac107_00014730	28	35	25	17	0.167374	0.765775	0	0.0216378	1.73472e-18	Predicted small periplasmic lipoprotein
Lac107_00053160	292	206	396	291	0.167904	0.765896	0	0.0216378	1.73472e-18	Primase C terminal 1 (PriCT-1)./Replicase family.
Lac107_00058880	89	88	63	66	0.167722	0.76604	0	0.0216378	1.73472e-18	Uncharacterized conserved protein
Lac107_00038820	368	504	279	350	0.168883	0.766218	0	0.0216378	1.73472e-18	C-terminal peptidase (prc)
Lac107_00056210	1606	1974	1054	1446	0.169103	0.766374	0	0.0216378	1.73472e-18	Obg family GTPase CgtA
Lac107_00001600	613	799	490	521	0.168653	0.766693	0	0.0216378	1.73472e-18	tryptophanyl-tRNA synthetase
Lac107_00061240	56	78	45	52	0.167302	0.766911	0	0.0216378	1.73472e-18	Sugar phosphate permease
Lac107_00047530	38	37	25	27	0.170911	0.767357	0	0.0216378	1.73472e-18	Acetyltransferases
Lac107_00024220	1289	852.5	686	832	0.170094	0.768004	0	0.0216378	1.73472e-18	Iron-sulfur cluster assembly accessory protein
Lac107_00000520	270	142	345	221	0.167302	0.768067	0	0.0216378	1.73472e-18	hypothetical protein
Lac107_00001410	103	65	125	106	0.169325	0.768621	0	0.0216378	1.73472e-18	hypothetical protein
Lac107_00061220	35	29	20	25	0.169426	0.768874	0	0.0216378	1.73472e-18	Transcriptional regulator
Lac107_00061790	24	21	7	22	0.169365	0.769424	0	0.0216378	1.73472e-18	Arabinose efflux permease
Lac107_00026880	20	16	12	10	0.169286	0.76943	0	0.0216378	1.73472e-18	hypothetical protein
Lac107_00050660	46	27	31	20	0.172799	0.769819	0	0.0216378	1.73472e-18	diguanylate cyclase (GGDEF) domain
Lac107_00005090	242	259	240	126	0.170897	0.770034	0	0.0216378	1.73472e-18	hypothetical protein
Lac107_00022410	947	976	476	892	0.170473	0.770147	0	0.0216378	1.73472e-18	pyruvate dehydrogenase E1 component, homodimeric type
Lac107_00024230	1024	882	648	709	0.17183	0.770151	0	0.0216378	1.73472e-18	N-acetyl-gamma-glutamyl-phosphate reductase, common form
Lac107_00019480	74.5	95	58	65	0.168647	0.77033	0	0.0216378	1.73472e-18	His Kinase A (phosphoacceptor) domain./PAS fold./Response regulator receiver domain./Histidine kinase-, DNA gyrase B-, and HSP90-like ATPase.
Lac107_00018570	133	181.5	98	131	0.172352	0.770427	0	0.0216378	1.73472e-18	hypothetical protein
Lac107_00030200	34	72	29	46	0.172472	0.770574	0	0.0216378	1.73472e-18	Uncharacterized protein conserved in bacteria
Lac107_00023450	25	32	20	19	0.171619	0.771336	0	0.0216378	1.73472e-18	Major Facilitator Superfamily.
Lac107_00056940	31	22	20	15	0.175161	0.771391	0	0.0216378	1.73472e-18	ABC-type xylose transport system, permease component
Lac107_00033530	82	98	65	66	0.170974	0.771733	0	0.0216378	1.73472e-18	Cytosine deaminase and related metal-dependent hydrolases
Lac107_00048580	155	171	93	146	0.17005	0.771757	0	0.0216378	1.73472e-18	N-acyl-D-glucosamine 2-epimerase
Lac107_00054580	129	120	157	183	0.170072	0.77207	0	0.0216378	1.73472e-18	FimV C-terminal domain
Lac107_00054230	95	118	79	76	0.170734	0.772182	0	0.0216378	1.73472e-18	TIGR01777 family protein
Lac107_00037450	742	724	592	459	0.170923	0.772462	0	0.0216378	1.73472e-18	protein translocase, SecG subunit
Lac107_00063650	21	21	16	11	0.170229	0.772697	0	0.0216378	1.73472e-18	Signal transduction histidine kinase regulating C4-dicarboxylate transport system
Lac107_00020060	20	35	22	15	0.169508	0.772758	0	0.0216378	1.73472e-18	hypothetical protein
Lac107_00007020	77	54	112	69	0.172375	0.773082	0	0.0216378	1.73472e-18	hypothetical protein
Lac107_00010820	44	83	62	30	0.17408	0.773163	0	0.0216378	1.73472e-18
Lac107_00058470	27	24	20	14	0.170058	0.773205	0	0.0216378	1.73472e-18	integrating conjugative element protein, PFL_4705 family
Lac107_00065170	7	4	15	5	0.176226	0.773284	0	0.0216378	1.73472e-18
Lac107_00021360	82	91	65	60	0.170603	0.773329	0	0.0216378	1.73472e-18	Transcriptional regulator
Lac107_00032500	16	14	9	9	0.1783	0.773818	0	0.0216378	1.73472e-18	Uncharacterized protein involved in biosynthesis of c-type cytochromes
Lac107_00030150	43	44	26	35	0.176699	0.77403	0	0.0216378	1.73472e-18	Acetolactate synthase
Lac107_00029510	503	500	347	379	0.174206	0.774125	0	0.0216378	1.73472e-18	Anti-anti-sigma regulatory factor (antagonist of anti-sigma factor)
Lac107_00030170	59	69	43	50	0.174286	0.774418	0	0.0216378	1.73472e-18	methylmalonic acid semialdehyde dehydrogenase
Lac107_00015480	218	317	160	230	0.174964	0.774449	0	0.0216378	1.73472e-18	ABC-type branched-chain amino acid transport systems, periplasmic component
Lac107_00011750	31	34	25	20	0.175225	0.774471	0	0.0216378	1.73472e-18	hypothetical protein
Lac107_00026600	32	37	20	28	0.174528	0.774602	0	0.0216378	1.73472e-18	acetylornithine and succinylornithine aminotransferases
Lac107_00050200	145	83	104	64	0.172061	0.774811	0	0.0216378	1.73472e-18
Lac107_00055120	23	26	19	13	0.176749	0.774897	0	0.0216378	1.73472e-18	hypothetical protein
Lac107_00028210	70	67	43	56	0.174009	0.775296	0	0.0216378	1.73472e-18	2-haloalkanoic acid dehalogenase, type II
Lac107_00006630	107	81	157	101	0.176886	0.775723	0	0.0216378	1.73472e-18	hypothetical protein
Lac107_00047500	24	21	21	8	0.178026	0.77608	0	0.0216378	1.73472e-18	Sulfotransferase domain.
Lac107_00034180	187	148	109	137	0.178989	0.776085	0	0.0216378	1.73472e-18	Signal transduction histidine kinase
Lac107_00029470	20	27	12	19	0.177559	0.776199	0	0.0216378	1.73472e-18	hypothetical protein
Lac107_00022470	25	20	20	9	0.178276	0.776216	0	0.0216378	1.73472e-18	ABC-type polysaccharide/polyol phosphate export systems, permease component
Lac107_00025280	22	16	14	10	0.178432	0.776844	0	0.0216378	1.73472e-18	hypothetical protein
Lac107_00032690	7	6	3	3	0.189482	0.777191	0	0.0216378	1.73472e-18	hypothetical protein
Lac107_00018230	8	8	5	3	0.180577	0.777344	0	0.0216378	1.73472e-18	hypothetical protein
Lac107_00062610	186	244	137.5	179	0.177465	0.777494	0	0.0216378	1.73472e-18	Protein of unknown function, DUF481.
Lac107_00044040	22	26	15	16	0.179975	0.777674	0	0.0216378	1.73472e-18	Methyl-accepting chemotaxis protein
Lac107_00045060	99	90	68	70	0.180157	0.777798	0	0.0216378	1.73472e-18	drug resistance transporter, EmrB/QacA subfamily
Lac107_00030920	73	60	50	46	0.178301	0.777901	0	0.0216378	1.73472e-18	Transcriptional regulator
Lac107_00009740	2	5	1	1	0.189264	0.777958	0	0.0216378	1.73472e-18
Lac107_00015360	175	209	138	145	0.177517	0.777996	0	0.0216378	1.73472e-18	Rad3-related DNA helicases
Lac107_00000840	142	91	204	113	0.177997	0.7782	0	0.0216378	1.73472e-18	hypothetical protein
Lac107_00068080	44	32	37	16	0.177643	0.778394	0	0.0216378	1.73472e-18	hypothetical protein
Lac107_00036000	86	72	55	60	0.173803	0.778585	0	0.0216378	1.73472e-18	Hemolysins and related proteins containing CBS domains
Lac107_00034390	181	178	124	139	0.176195	0.779033	0	0.0216378	1.73472e-18	Xaa-Pro aminopeptidase
Lac107_00067100	12	23	14	8	0.179457	0.779161	0	0.0216378	1.73472e-18	hypothetical protein
Lac107_00018260	10	9	6	4	0.176259	0.77949	0	0.0216378	1.73472e-18	hypothetical protein
Lac107_00019980	58	74	46	49	0.183294	0.779526	0	0.0216378	1.73472e-18	3-carboxymuconate cyclase
Lac107_00057670	55	79	38	58	0.177485	0.779583	0	0.0216378	1.73472e-18	hypothetical protein
Lac107_00051810	2	3	6	5	0.190203	0.779649	0	0.0216378	1.73472e-18	Protein of unknown function (DUF3649).
Lac107_00039580	122	140	107.5	84	0.176412	0.779732	0	0.0216378	1.73472e-18	Transcriptional regulators of sugar metabolism
Lac107_00037100	102	107	76	77	0.180134	0.779796	0	0.0216378	1.73472e-18	ribosomal protein L34, bacterial type
Lac107_00058620	11	21	8	12	0.174561	0.779952	0	0.0216378	1.73472e-18	Dehydrogenases with different specificities (related to short-chain alcohol dehydrogenases)
Lac107_00031020	44	47	31	34	0.180003	0.780268	0	0.0216378	1.73472e-18	Transcriptional regulator
Lac107_00001850	58	55	101.5	53	0.181738	0.780546	0	0.0216378	1.73472e-18	hypothetical protein
Lac107_00006310	221	333	182	225	0.179875	0.781661	0	0.0216378	1.73472e-18	hypothetical protein
Lac107_00010920	349	520	341	294	0.18202	0.781757	0	0.0216378	1.73472e-18	hypothetical protein
Lac107_00066920	63	106	53	69	0.175589	0.782026	0	0.0216378	1.73472e-18	TraG-like protein, N-terminal region.
Lac107_00046420	260	241	197	171	0.181939	0.782608	0	0.0216378	1.73472e-18	Uncharacterized conserved protein
Lac107_00030940	9	12	4	7	0.187372	0.78281	0	0.0216378	1.73472e-18	hypothetical protein
Lac107_00061280	127	149	74.5	129	0.181036	0.78283	0	0.0216378	1.73472e-18	3-carboxy-cis,cis-muconate cycloisomerase
Lac107_00029410	59	67	53	38	0.180588	0.783071	0	0.0216378	1.73472e-18	PilZ domain.
Lac107_00046010	45	56	35	38	0.18272	0.783139	0	0.0216378	1.73472e-18	prepilin-type N-terminal cleavage/methylation domain
Lac107_00031060	107.5	106	76	81	0.182691	0.783183	0	0.0216378	1.73472e-18	rarD protein
Lac107_00052110	15	21	11	12	0.179865	0.783337	0	0.0216378	1.73472e-18	hypothetical protein
Lac107_00006850	295	249	437	306	0.179212	0.783396	0	0.0216378	1.73472e-18	StbA protein.
Lac107_00050530	13	16	9	9	0.179273	0.78346	0	0.0216378	1.73472e-18	Protein of unknown function (DUF2796).
Lac107_00003280	308	403	304	218	0.182967	0.783481	0	0.0216378	1.73472e-18	hypothetical protein
Lac107_00028420	24	27	31	43	0.177033	0.783556	0	0.0216378	1.73472e-18	Ureidoglycolate hydrolase
Lac107_00060770	267	297	171	243	0.180971	0.783722	0	0.0216378	1.73472e-18	Dihydroxyacid dehydratase/phosphogluconate dehydratase
Lac107_00028580	8	7	11	15	0.178799	0.783805	0	0.0216378	1.73472e-18	hypothetical protein
Lac107_00038120	4274	5487	3059	3611	0.18151	0.783831	0	0.0216378	1.73472e-18	Ribosomal protein S9
Lac107_00043520	31	66	34	35	0.181289	0.783856	0	0.0216378	1.73472e-18	hypothetical protein
Lac107_00006080	76	78	111	99	0.18239	0.78392	0	0.0216378	1.73472e-18	hypothetical protein
Lac107_00006530	288	202	406	263	0.178696	0.784418	0	0.0216378	1.73472e-18	Viral (Superfamily 1) RNA helicase.
Lac107_00016000	15	31	20	10	0.182702	0.784685	0	0.0216378	1.73472e-18	Transcriptional regulators
Lac107_00055390	105.5	104	66	87	0.180558	0.784777	0	0.0216378	1.73472e-18	hypothetical protein
Lac107_00051620	22	23	32	32	0.184119	0.784783	0	0.0216378	1.73472e-18	parallel beta-helix repeat (two copies)
Lac107_00018880	7	19	17	23	0.184097	0.784799	0	0.0216378	1.73472e-18	Aerobic-type carbon monoxide dehydrogenase, middle subunit CoxM/CutM homologs
Lac107_00031810	161	127	110	102	0.18437	0.785045	0	0.0216378	1.73472e-18	Response regulators consisting of a CheY-like receiver domain and a winged-helix DNA-binding domain
Lac107_00030130	99	103	69	78	0.178996	0.785686	0	0.0216378	1.73472e-18	Sugar phosphate isomerases/epimerases
Lac107_00048620	101	99	71	75	0.182237	0.78575	0	0.0216378	1.73472e-18	VRR-NUC domain.
Lac107_00001510	360	222	467	327	0.181743	0.786171	0	0.0216378	1.73472e-18	hypothetical protein
Lac107_00058450	3	6	7	10	0.181099	0.786238	0	0.0216378	1.73472e-18	conjugative transfer region lipoprotein, TIGR03751 family
Lac107_00002090	19	14	14	7	0.188657	0.786942	0	0.0216378	1.73472e-18	hypothetical protein
Lac107_00031310	124.5	108	97	74	0.18698	0.786969	0	0.0216378	1.73472e-18	Histidine kinase-, DNA gyrase B-, and HSP90-like ATPase.
Lac107_00041000	44	41	63	55	0.188243	0.787045	0	0.0216378	1.73472e-18	TonB-dependent siderophore receptor
Lac107_00000180	460	677	404	426	0.187465	0.787163	0	0.0216378	1.73472e-18	hypothetical protein
Lac107_00024420	19	22	22	38	0.175642	0.787316	0	0.0216378	1.73472e-18	Uncharacterized homolog of phage Mu protein gp47
Lac107_00040860	34	29	20	23	0.182746	0.787427	0	0.0216378	1.73472e-18	Na+/proline symporter
Lac107_00030310	144	139	108	100	0.185059	0.787601	0	0.0216378	1.73472e-18	hypothetical protein
Lac107_00019710	223	264	144	217	0.186369	0.787859	0	0.0216378	1.73472e-18	Acetyl-CoA carboxylase, carboxyltransferase component (subunits alpha and beta)
Lac107_00050380	26	56	24	34	0.18403	0.787918	0	0.0216378	1.73472e-18	Hydrogenase/urease accessory protein
Lac107_00050320	23	66	26	38	0.181945	0.788808	0	0.0216378	1.73472e-18	Bacterioferritin (cytochrome b1)
Lac107_00003910	440	234	571.5	350	0.184567	0.788898	0	0.0216378	1.73472e-18	hypothetical protein
Lac107_00050050	3	6	1	2	0.1899	0.788902	0	0.0216378	1.73472e-18	hypothetical protein
Lac107_00000870	330	421	298	253	0.188015	0.789179	0	0.0216378	1.73472e-18	hypothetical protein
Lac107_00020450	11	6	13	15	0.185327	0.789468	0	0.0216378	1.73472e-18	oligopeptide/dipeptide ABC transporter, ATP-binding protein, C-terminal domain
Lac107_00047340	487	636	367	451	0.187351	0.789578	0	0.0216378	1.73472e-18	4-aminobutyrate aminotransferase, prokaryotic type
Lac107_00001200	153	196	159	100	0.184802	0.789639	0	0.0216378	1.73472e-18	hypothetical protein
Lac107_00032180	31	52	29	29	0.186366	0.789652	0	0.0216378	1.73472e-18	prevent-host-death family protein
Lac107_00038710	404	526	318	363	0.189583	0.789772	0	0.0216378	1.73472e-18	Major Facilitator Superfamily.
Lac107_00053970	17	19	12	11	0.189992	0.789792	0	0.0216378	1.73472e-18	Putative threonine efflux protein
Lac107_00025400	11	8	15	17	0.191283	0.789907	0	0.0216378	1.73472e-18	Predicted phosphohydrolases
Lac107_00000590	270	176	377	226	0.190009	0.790103	0	0.0216378	1.73472e-18	hypothetical protein
Lac107_00016670	390	479	264	375	0.189263	0.790286	0	0.0216378	1.73472e-18	iron-sulfur cluster assembly protein IscA
Lac107_00041670	48	72	37	49	0.183266	0.791031	0	0.0216378	1.73472e-18	Predicted hydrolases or acyltransferases (alpha/beta hydrolase superfamily)
Lac107_00005470	48	61	34	45	0.185839	0.791102	0	0.0216378	1.73472e-18	hypothetical protein
Lac107_00046530	141	133	105.5	97	0.19014	0.7917	0	0.0216378	1.73472e-18	NADH:ubiquinone oxidoreductase subunit 3 (chain A)
Lac107_00037590	52	45	36	33	0.188331	0.791899	0	0.0216378	1.73472e-18	Predicted permeases
Lac107_00028730	40	52	29	37	0.198059	0.792149	0	0.0216378	1.73472e-18	Inhibitor of the KinA pathway to sporulation, predicted exonuclease
Lac107_00026900	47	47	33	35	0.188597	0.792225	0	0.0216378	1.73472e-18	hypothetical protein
Lac107_00066720	68	58	55	36	0.188985	0.792646	0	0.0216378	1.73472e-18	Methyl-accepting chemotaxis protein
Lac107_00052220	22	23	28	36	0.192829	0.792762	0	0.0216378	1.73472e-18	ABC-type nitrate/sulfonate/bicarbonate transport systems, periplasmic components
Lac107_00029050	86	88	58	70	0.193759	0.792891	0	0.0216378	1.73472e-18	hypothetical protein
Lac107_00043780	32	21	37	38	0.19275	0.793162	0	0.0216378	1.73472e-18	Outer membrane protein
Lac107_00027930	309	258	204.5	215	0.189388	0.793293	0	0.0216378	1.73472e-18	ABC-type sugar transport system, periplasmic component
Lac107_00048010	75	91	58	64	0.188716	0.793646	0	0.0216378	1.73472e-18	Chemotaxis signal transduction protein
Lac107_00039060	280	366	205	272	0.192526	0.793764	0	0.0216378	1.73472e-18	Spermidine/putrescine-binding periplasmic protein
Lac107_00008320	190	125	250	173	0.193657	0.794197	0	0.0216378	1.73472e-18	conserved hypothetical protein, ribA/ribD-fused
Lac107_00007150	168	97	227	130	0.189451	0.794374	0	0.0216378	1.73472e-18	hypothetical protein
Lac107_00003960	96	113	84	71	0.191873	0.794537	0	0.0216378	1.73472e-18	hypothetical protein
Lac107_00062270	67	66	48	48	0.19564	0.7949	0	0.0216378	1.73472e-18	Predicted glutamine amidotransferase
Lac107_00022150	99	103	70	79	0.191756	0.794919	0	0.0216378	1.73472e-18	HAD-superfamily subfamily IB hydrolase, TIGR01490
Lac107_00028720	132.5	124	98	92	0.194738	0.795138	0	0.0216378	1.73472e-18	Uncharacterized protein conserved in bacteria
Lac107_00023780	203	257	118	223	0.192866	0.795228	0	0.0216378	1.73472e-18	Zn-dependent oligopeptidases
Lac107_00005780	186	149	284	167	0.195495	0.795446	0	0.0216378	1.73472e-18	radical SAM additional 4Fe4S-binding domain
Lac107_00035720	14	23	16	8	0.195016	0.795483	0	0.0216378	1.73472e-18	Uncharacterized conserved protein
Lac107_00034170-scaffold00082_75457	6	4	14	5	0.188092	0.79549	0	0.0216378	1.73472e-18	Protein of unknown function (DUF1534).
Lac107_00068000	4	1	6	5	0.196476	0.795585	0.00333333	0.0277687	0.000391473	hypothetical protein
Lac107_00008310	93	69	132	89	0.188721	0.795645	0	0.0216378	1.73472e-18	hypothetical protein
Lac107_00054770	7	7	3	4	0.190572	0.795769	0	0.0216378	1.73472e-18	Protein of unknown function (DUF3309).
Lac107_00024280	90	103	64	78	0.195243	0.795897	0	0.0216378	1.73472e-18	Ubiquinone biosynthesis protein COQ7
Lac107_00059400	35	39	18	34	0.194795	0.79602	0	0.0216378	1.73472e-18	haloacid dehalogenase superfamily, subfamily IA, variant 3 with third motif having DD or ED
Lac107_00063840	565	638	377	503	0.194333	0.796155	0	0.0216378	1.73472e-18	argininosuccinate synthase
Lac107_00055660	64	67	44	52	0.199941	0.796827	0	0.0216378	1.73472e-18	hypothetical protein
Lac107_00020130	23	25	20	13	0.202073	0.796931	0	0.0216378	1.73472e-18	Transcriptional regulator
Lac107_00029290	8	12	6	5	0.188457	0.796969	0	0.0216378	1.73472e-18	Dehydrogenases with different specificities (related to short-chain alcohol dehydrogenases)
Lac107_00023600	87.5	85	56	71	0.196756	0.797289	0	0.0216378	1.73472e-18	Histidine kinase.
Lac107_00004690	86	111	69	77	0.195556	0.797635	0	0.0216378	1.73472e-18	hypothetical protein
Lac107_00008420	91	127	77	85	0.19328	0.797702	0	0.0216378	1.73472e-18	hypothetical protein
Lac107_00055170	3	2	6	4	0.196286	0.797829	0	0.0216378	1.73472e-18	outer membrane protein assembly complex, YaeT protein
Lac107_00055250	58	58	48	37	0.194205	0.798173	0	0.0216378	1.73472e-18	hypothetical protein
Lac107_00044810	69	77	49	58	0.196867	0.798216	0	0.0216378	1.73472e-18	MoxR-like ATPases
Lac107_00000530	292	180	402	235	0.194029	0.798347	0	0.0216378	1.73472e-18	hypothetical protein
Lac107_00008210	110	270	127	156	0.198669	0.798373	0	0.0216378	1.73472e-18	SsrA-binding protein
Lac107_00055130	12	20	12	8	0.201222	0.79861	0	0.0216378	1.73472e-18	hypothetical protein
Lac107_00050520	18	17	13	9	0.19962	0.799397	0	0.0216378	1.73472e-18	SnoaL-like polyketide cyclase.
Lac107_00008060	94	145	95	84	0.199424	0.799571	0	0.0216378	1.73472e-18	hypothetical protein
Lac107_00016860	50	37	29	33	0.193963	0.800044	0	0.0216378	1.73472e-18	Membrane proteins related to metalloendopeptidases
Lac107_00002930	41	44	31	30	0.197938	0.800209	0	0.0216378	1.73472e-18	hypothetical protein
Lac107_00065260	9	3	1	4	0.190966	0.800825	0	0.0216378	1.73472e-18	hypothetical protein
Lac107_00059070-scaffold00088_95968	12	11	10	3	0.205465	0.800879	0	0.0216378	1.73472e-18	urea carboxylase
Lac107_00025610	45	57	32	42	0.197668	0.800896	0	0.0216378	1.73472e-18	choline ABC transporter, ATP-binding protein
Lac107_00044530	32	48	35	22	0.197821	0.800996	0	0.0216378	1.73472e-18	glutamyl-queuosine tRNA(Asp) synthetase
Lac107_00003350	127	99	196	107	0.197394	0.801123	0	0.0216378	1.73472e-18	hypothetical protein
Lac107_00067220	58	68	42	50	0.201091	0.801807	0	0.0216378	1.73472e-18	hypothetical protein
Lac107_00063970	11	14	9	6	0.192862	0.802095	0	0.0216378	1.73472e-18	Fatty acid desaturase
Lac107_00001100	1123	1270	875	857	0.200854	0.802306	0	0.0216378	1.73472e-18	hypothetical protein
Lac107_00057340	241	259.5	172	201	0.203043	0.8031	0	0.0216378	1.73472e-18	Methyl-accepting chemotaxis protein
Lac107_00043160	251.5	323	187	240	0.202437	0.803243	0	0.0216378	1.73472e-18	lipoate synthase
Lac107_00032280	47	47	30	38	0.199084	0.803266	0	0.0216378	1.73472e-18	outer membrane autotransporter barrel domain
Lac107_00007230	162	117	211.5	163	0.197057	0.803304	0	0.0216378	1.73472e-18	hypothetical protein
Lac107_00036600	73	71	50	57	0.199442	0.803806	0	0.0216378	1.73472e-18	ABC-type nitrate/sulfonate/bicarbonate transport system, ATPase component
Lac107_00014420	27	36	17	26	0.198917	0.804023	0	0.0216378	1.73472e-18	Uncharacterized protein conserved in bacteria
Lac107_00025260	55	68	41	49	0.201082	0.804027	0	0.0216378	1.73472e-18	Acyl-CoA dehydrogenases
Lac107_00032410	31	23	21	16	0.198653	0.804079	0	0.0216378	1.73472e-18	Uncharacterized homolog of the cytoplasmic domain of flagellar protein FhlB
Lac107_00023350	89	107	63	84	0.203084	0.804338	0	0.0216378	1.73472e-18	hypothetical protein
Lac107_00015330	50	49	38	33	0.200608	0.804626	0	0.0216378	1.73472e-18	Purine nucleoside permease
Lac107_00022040	14	18	9	11	0.2039	0.804652	0	0.0216378	1.73472e-18	tartrate dehydrogenase
Lac107_00007710	295	346	282	194	0.20347	0.804971	0	0.0216378	1.73472e-18	hypothetical protein
Lac107_00053700	81	63	105	90	0.202072	0.80501	0	0.0216378	1.73472e-18	Putative transposase.
Lac107_00020260	28	33	18	23	0.201527	0.805077	0	0.0216378	1.73472e-18	hypothetical protein
Lac107_00002860	360	455.5	312.5	292	0.202853	0.805383	0	0.0216378	1.73472e-18	hypothetical protein
Lac107_00041950	3	3	7	6	0.214891	0.805463	0	0.0216378	1.73472e-18	oligopeptide/dipeptide ABC transporter, ATP-binding protein, C-terminal domain
Lac107_00061920	31	32	25	18	0.20108	0.805534	0	0.0216378	1.73472e-18	Zn-dependent hydrolases, including glyoxylases
Lac107_00014830	291	312	184	265	0.202811	0.805535	0	0.0216378	1.73472e-18	Nitrogen regulatory protein PII
Lac107_00015780	10	16	5	10	0.205508	0.805596	0	0.0216378	1.73472e-18	Protein of unknown function (DUF2000).
Lac107_00066220	70	81	64	48	0.204693	0.805901	0	0.0216378	1.73472e-18	Signal transduction histidine kinase
Lac107_00016600	329	489.5	263	344	0.203801	0.806038	0	0.0216378	1.73472e-18	Predicted outer membrane lipoprotein
Lac107_00006180	42	24	62	30	0.207994	0.806047	0	0.0216378	1.73472e-18	hypothetical protein
Lac107_00066190	32	40	28	23	0.204466	0.806091	0	0.0216378	1.73472e-18	Predicted hydrolases or acyltransferases (alpha/beta hydrolase superfamily)
Lac107_00006210	213	318	228	167	0.205632	0.806238	0	0.0216378	1.73472e-18	hypothetical protein
Lac107_00035950	28	34	18	25	0.204476	0.806415	0	0.0216378	1.73472e-18	Rubredoxin
Lac107_00059390	101	120	68	97	0.201189	0.807061	0	0.0216378	1.73472e-18	Transcriptional regulator
Lac107_00067240	4	6	2	2	0.196769	0.807393	0	0.0216378	1.73472e-18	hypothetical protein
Lac107_00036500	232	357	160	279	0.204451	0.807404	0	0.0216378	1.73472e-18	Cyclopropane fatty acid synthase and related methyltransferases
Lac107_00063190	13	17	7	11	0.205032	0.807771	0	0.0216378	1.73472e-18	Conserved protein/domain typically associated with flavoprotein oxygenases, DIM6/NTAB family
Lac107_00029520	56	61	40	46	0.209214	0.807838	0	0.0216378	1.73472e-18	Transaldolase
Lac107_00045560	8	2	2	2	0.196836	0.808069	0	0.0216378	1.73472e-18	Phage terminase, small subunit
Lac107_00021580	61	52	57	96	0.203219	0.808141	0	0.0216378	1.73472e-18	Beta-lactamase class C and other penicillin binding proteins
Lac107_00065010	24	26	14	20	0.204567	0.808147	0	0.0216378	1.73472e-18	Methyl-accepting chemotaxis protein
Lac107_00062200	56	68	33	59	0.205479	0.808472	0	0.0216378	1.73472e-18	cysteine synthase A
Lac107_00014640	71	86	57	60	0.205832	0.808535	0	0.0216378	1.73472e-18	FOG: EAL domain
Lac107_00042900	55	51	36	41	0.203026	0.808584	0	0.0216378	1.73472e-18	putative efflux protein, MATE family
Lac107_00030350	177	256.5	146	179	0.207779	0.808611	0	0.0216378	1.73472e-18	fatty oxidation complex, beta subunit FadA
Lac107_00042030	54	66	45	43	0.207432	0.808899	0	0.0216378	1.73472e-18	Response regulator containing a CheY-like receiver domain and an HTH DNA-binding domain
Lac107_00066780	33	50	32	28	0.206827	0.809035	0	0.0216378	1.73472e-18	hypothetical protein
Lac107_00037010	93	90	70	67	0.208921	0.809063	0	0.0216378	1.73472e-18	F0F1-type ATP synthase, subunit I
Lac107_00036300	23	24.5	24	8	0.210387	0.80909	0	0.0216378	1.73472e-18	Transcriptional regulator
Lac107_00009310	201	264	197.5	151	0.201754	0.809118	0	0.0216378	1.73472e-18	Protein of unknown function (DUF2388).
Lac107_00006860	50	48	85	50	0.208442	0.809173	0	0.0216378	1.73472e-18	hypothetical protein
Lac107_00060200	23	13	29	24	0.205592	0.809405	0	0.0216378	1.73472e-18	Flp pilus assembly protein TadB
Lac107_00041370	225	246	165	189	0.208335	0.809427	0	0.0216378	1.73472e-18	Electron transfer flavoprotein, alpha subunit
Lac107_00011050	34	40	28	24	0.20788	0.809697	0	0.0216378	1.73472e-18	hypothetical protein
Lac107_00020320	45	53	38	34	0.204592	0.809928	0	0.0216378	1.73472e-18	Acetyltransferases
Lac107_00055550	47	60	32	46	0.208342	0.809989	0	0.0216378	1.73472e-18	hypothetical protein
Lac107_00061300	14	16	6	12	0.204931	0.810178	0	0.0216378	1.73472e-18	protocatechuate 3,4-dioxygenase, alpha subunit
Lac107_00027490	94	101	76	69	0.20612	0.810448	0	0.0216378	1.73472e-18	dimethyl sulfone monooxygenase SfnG
Lac107_00002780	29	60	32	32	0.204181	0.810471	0	0.0216378	1.73472e-18	hypothetical protein
Lac107_00006930	170	135	239	168	0.209181	0.810716	0	0.0216378	1.73472e-18	hypothetical protein
Lac107_00011460-scaffold00088_95968	4	1	1	0	0.225191	0.810941	0	0.0216378	1.73472e-18	hypothetical protein
Lac107_00064240	33	38	25	25	0.202343	0.811212	0	0.0216378	1.73472e-18	hypothetical protein
Lac107_00015840	16	21.5	15	9	0.210768	0.811271	0	0.0216378	1.73472e-18	Putative threonine efflux protein
Lac107_00025320	51	59	43	38	0.212007	0.811575	0	0.0216378	1.73472e-18	dethiobiotin synthase
Lac107_00035600	128	179	103	127	0.211587	0.811827	0	0.0216378	1.73472e-18	guanylate kinase
Lac107_00021990	4	9	3	3	0.216096	0.812108	0	0.0216378	1.73472e-18	hypothetical protein
Lac107_00057380	12	11	12.5	23	0.203643	0.812386	0	0.0216378	1.73472e-18	Uncharacterized protein conserved in bacteria
Lac107_00055510	9	15	9	6	0.20665	0.812549	0	0.0216378	1.73472e-18	hypothetical protein
Lac107_00004200	534	571	445	375	0.209596	0.812611	0	0.0216378	1.73472e-18	hypothetical protein
Lac107_00017130	4465.5	3558.5	2618.5	3028	0.210344	0.812641	0	0.0216378	1.73472e-18	ribosomal protein L19, bacterial type
Lac107_00023640	153	174	137	109	0.212343	0.812695	0	0.0216378	1.73472e-18	Uncharacterized enzyme of heme biosynthesis
Lac107_00049420	113.5	66	143	96	0.212775	0.812789	0	0.0216378	1.73472e-18
Lac107_00010210	81	58	110	76	0.213654	0.813141	0	0.0216378	1.73472e-18	hypothetical protein
Lac107_00024580	6	8	5	2	0.216113	0.813882	0	0.0216378	1.73472e-18	Mu-like prophage protein Com.
Lac107_00021500	17	24	14	13	0.215963	0.814184	0	0.0216378	1.73472e-18	Dehydrogenases with different specificities (related to short-chain alcohol dehydrogenases)
Lac107_00025270	219	148.5	150	127	0.215703	0.81428	0	0.0216378	1.73472e-18	diguanylate cyclase (GGDEF) domain
Lac107_00001240	61	35	86	44	0.22139	0.814406	0	0.0216378	1.73472e-18	hypothetical protein
Lac107_00066740	40	39	35	21	0.213283	0.814628	0	0.0216378	1.73472e-18	hypothetical protein
Lac107_00024620	31	77	27	53	0.213883	0.814936	0	0.0216378	1.73472e-18	Pyocin activator protein PrtN.
Lac107_00053250	48	39	53	64	0.218993	0.814968	0	0.0216378	1.73472e-18	hypothetical protein
Lac107_00051200	1630.5	2206	1177	1588	0.212912	0.815012	0	0.0216378	1.73472e-18	50S ribosomal protein L11
Lac107_00005390	118	151	106	96	0.213779	0.815217	0	0.0216378	1.73472e-18	hypothetical protein
Lac107_00016410	6	8	5	2	0.216072	0.815238	0	0.0216378	1.73472e-18	hypothetical protein
Lac107_00025750	15	27	12	17	0.216776	0.815396	0	0.0216378	1.73472e-18	Glutathione S-transferase
Lac107_00030660	113	119	82	93	0.210846	0.81584	0	0.0216378	1.73472e-18	Cyanate permease
Lac107_00015730	41	42	23	36	0.211351	0.815852	0	0.0216378	1.73472e-18	Dehydrogenases with different specificities (related to short-chain alcohol dehydrogenases)
Lac107_00041640	81	115	60	87	0.214217	0.816237	0	0.0216378	1.73472e-18	hypothetical protein
Lac107_00003700	107	166	118.5	87	0.212256	0.816264	0	0.0216378	1.73472e-18	ADP-ribosylglycohydrolase
Lac107_00037510	1049	1097	777	795	0.213107	0.816385	0	0.0216378	1.73472e-18	tRNA pseudouridine 55 synthase
Lac107_00041380	153	141	106	114	0.214801	0.816537	0	0.0216378	1.73472e-18	ABC-type amino acid transport/signal transduction systems, periplasmic component/domain
Lac107_00022000	31	43	18	35	0.214261	0.816771	0	0.0216378	1.73472e-18	hypothetical protein
Lac107_00058110	3	6	4	0	0.22943	0.816916	0	0.0216378	1.73472e-18	Uncharacterized protein related to arylsulfate sulfotransferase involved in siderophore biosynthesis
Lac107_00048310	3	6	9	7	0.219155	0.816927	0	0.0216378	1.73472e-18	Uncharacterized ABC-type transport system, permease component
Lac107_00060090	124	130	107	83	0.218225	0.816929	0	0.0216378	1.73472e-18	Factor for inversion stimulation Fis, transcriptional activator
Lac107_00036210	215	232	117	220	0.21415	0.817443	0	0.0216378	1.73472e-18	L-asparaginase/archaeal Glu-tRNAGln amidotransferase subunit D
Lac107_00032060	341	328	244.5	256	0.216429	0.817624	0	0.0216378	1.73472e-18	Chemotaxis signal transduction protein
Lac107_00005000	117.5	94	186	95	0.219459	0.817654	0	0.0216378	1.73472e-18	hypothetical protein
Lac107_00045350	7	13	2	10	0.207061	0.817791	0	0.0216378	1.73472e-18	hypothetical protein
Lac107_00065760	300	443	270	285	0.216438	0.817825	0	0.0216378	1.73472e-18	Carbon storage regulator (could also regulate swarming and quorum sensing)
Lac107_00049800-scaffold00004_77962	1	1	2	4	0.225086	0.817849	0	0.0216378	1.73472e-18	hypothetical protein
Lac107_00036230	57	85	49	56	0.211898	0.817864	0	0.0216378	1.73472e-18	Predicted transporter component
Lac107_00061290	82	80	51	69	0.212436	0.81823	0	0.0216378	1.73472e-18	benzoate transport
Lac107_00063010	18	19	24	29	0.221581	0.818308	0	0.0216378	1.73472e-18	general secretion pathway protein D
Lac107_00035590	143	170	107	129	0.215594	0.818334	0	0.0216378	1.73472e-18	TIGR00255 family protein
Lac107_00052230	11	10	5	7	0.213598	0.818461	0	0.0216378	1.73472e-18	Response regulator with putative antiterminator output domain
Lac107_00019260	546.5	743	356.5	599	0.216374	0.818702	0	0.0216378	1.73472e-18	Glycine/D-amino acid oxidases (deaminating)
Lac107_00001300	438	542	395	335	0.219953	0.818999	0	0.0216378	1.73472e-18	hypothetical protein
Lac107_00021550	4	4	3	0	0.232695	0.81911	0	0.0216378	1.73472e-18	Transcriptional regulator
Lac107_00001530	67	91	59	59	0.212894	0.819138	0	0.0216378	1.73472e-18	hypothetical protein
Lac107_00054870	22	12	9	14	0.223712	0.819451	0	0.0216378	1.73472e-18	Arabinose efflux permease
Lac107_00000480	128	72	173.5	90	0.216465	0.819511	0	0.0216378	1.73472e-18	hypothetical protein
Lac107_00002520	257	160	327	228	0.219023	0.819553	0	0.0216378	1.73472e-18	hypothetical protein
Lac107_00053780	493.5	503	346	397	0.215417	0.819857	0	0.0216378	1.73472e-18	FKBP-type peptidyl-prolyl cis-trans isomerases 2
Lac107_00029580	105	159	86	113	0.216774	0.819893	0	0.0216378	1.73472e-18	Signal transduction histidine kinase
Lac107_00001010	1247	954	881	734	0.217259	0.819902	0	0.0216378	1.73472e-18	hypothetical protein
Lac107_00006490	686.5	518	960.5	671	0.218647	0.819967	0	0.0216378	1.73472e-18	Single-stranded DNA-specific exonuclease
Lac107_00066160	34	46	33	25	0.221471	0.820057	0	0.0216378	1.73472e-18	hypothetical protein
Lac107_00061270	48	53	22	52	0.218724	0.820256	0	0.0216378	1.73472e-18	4-carboxymuconolactone decarboxylase
Lac107_00036320	67	52	46	41	0.218482	0.820587	0	0.0216378	1.73472e-18	Transcriptional regulators
Lac107_00014610	180	217	118	181	0.213915	0.820607	0	0.0216378	1.73472e-18	phosphoenolpyruvate carboxykinase (ATP)
Lac107_00002830	84	102	76	64	0.223684	0.820663	0	0.0216378	1.73472e-18	hypothetical protein
Lac107_00036130	64.5	78	50	57	0.217442	0.82092	0	0.0216378	1.73472e-18	Uncharacterized protein conserved in bacteria
Lac107_00009190	357	478	317	310	0.221902	0.820992	0	0.0216378	1.73472e-18	hypothetical protein
Lac107_00051730	17	14	9.5	10	0.228857	0.821232	0	0.0216378	1.73472e-18	Predicted membrane protein
Lac107_00008890	35	50	37.5	24	0.2212	0.821312	0	0.0216378	1.73472e-18	hypothetical protein
Lac107_00048160	21	22	15	14	0.218066	0.821605	0	0.0216378	1.73472e-18	Cu/Zn superoxide dismutase
Lac107_00015560	76	88	61	62	0.220414	0.821638	0	0.0216378	1.73472e-18	Acyl dehydratase
Lac107_00007750	554	303	681	469	0.224178	0.82169	0	0.0216378	1.73472e-18	hypothetical protein
Lac107_00035920	7	7	4	3	0.216462	0.821956	0	0.0216378	1.73472e-18	hypothetical protein
Lac107_00001330	1040	479	1259	801	0.22219	0.822171	0	0.0216378	1.73472e-18	The (Largely Gram-negative Bacterial) Hydrophobe/Amphiphile Efflux-1 (HAE1) Family
Lac107_00017300	102	75	78	56	0.224404	0.822252	0	0.0216378	1.73472e-18	Chemotaxis signal transduction protein
Lac107_00061330	21	34	20	19	0.219327	0.822324	0	0.0216378	1.73472e-18	Predicted acyltransferases
Lac107_00022500	114	140	78	115	0.222183	0.822412	0	0.0216378	1.73472e-18	Biopolymer transport protein
Lac107_00010280	44	25	34	16	0.220302	0.822642	0	0.0216378	1.73472e-18	hypothetical protein
Lac107_00065390	19	18	22	32	0.224901	0.823145	0	0.0216378	1.73472e-18	Uncharacterized phage-encoded protein
Lac107_00020800	77	89	58	67	0.219369	0.823185	0	0.0216378	1.73472e-18	Transcriptional regulator, contains sigma factor-related N-terminal domain
Lac107_00006830	69	63	54	44	0.228258	0.823209	0	0.0216378	1.73472e-18	hypothetical protein
Lac107_00002640	51	31	62	49	0.226616	0.823308	0	0.0216378	1.73472e-18	hypothetical protein
Lac107_00051060	3183	5257	2193	3793	0.22254	0.823323	0	0.0216378	1.73472e-18	Ribosomal protein L23
Lac107_00017310	107	90	70	79	0.226785	0.823652	0	0.0216378	1.73472e-18	Methylase of chemotaxis methyl-accepting proteins
Lac107_00048800	44	49	35	32	0.222699	0.823765	0	0.0216378	1.73472e-18	Transcriptional regulators
Lac107_00029370	222	312	173	230	0.22405	0.823881	0	0.0216378	1.73472e-18	Arabinose efflux permease
Lac107_00027540	11	16	4	13	0.220516	0.823931	0	0.0216378	1.73472e-18	Glutamate synthase domain 3
Lac107_00025720	74	124	75	74	0.223358	0.824153	0	0.0216378	1.73472e-18	Protein of unknown function VcgC/VcgE (DUF2780).
Lac107_00021470	29	22	22	13	0.227327	0.824232	0	0.0216378	1.73472e-18	outer membrane porin, OprD family.
Lac107_00062150	56	48	49	28	0.224903	0.824243	0	0.0216378	1.73472e-18	Predicted transcriptional regulators
Lac107_00024960	1	3	0	0	0.252951	0.824383	0	0.0216378	1.73472e-18
Lac107_00051180	8723	11126.5	5605	8115	0.224218	0.824785	0	0.0216378	1.73472e-18	Ribosomal protein L10
Lac107_00043620	49	37	64	52	0.227641	0.824849	0	0.0216378	1.73472e-18	hypothetical protein
Lac107_00007120	183	144	261	172	0.223812	0.824877	0	0.0216378	1.73472e-18	hypothetical protein
Lac107_00051190	3248.5	5355.5	2246	3867	0.225165	0.825102	0	0.0216378	1.73472e-18	ribosomal protein L1, bacterial/chloroplast
Lac107_00023550	149	163	105.5	129	0.223051	0.825103	0	0.0216378	1.73472e-18	Na/Pi-cotransporter
Lac107_00032790	321	386.5	231	303	0.226045	0.825111	0	0.0216378	1.73472e-18	Uncharacterized protein conserved in bacteria
Lac107_00047380	182	153	122	133	0.226726	0.825248	0	0.0216378	1.73472e-18	PAS domain S-box/diguanylate cyclase (GGDEF) domain
Lac107_00056220	251	295	177	234	0.225271	0.825441	0	0.0216378	1.73472e-18	glutamate 5-kinase
Lac107_00066260	53	61	43	42	0.232164	0.825783	0	0.0216378	1.73472e-18	queuosine biosynthesis protein QueD
Lac107_00005680	390	330	553	403	0.229891	0.826016	0	0.0216378	1.73472e-18	hypothetical protein
Lac107_00044840	125	184	90	145	0.228328	0.826265	0	0.0216378	1.73472e-18	gluconate transporter
Lac107_00056330	46	44	36	30	0.222448	0.826334	0	0.0216378	1.73472e-18	type IV pilus modification protein PilV
Lac107_00066630	19	31	15	19	0.230966	0.826359	0	0.0216378	1.73472e-18	LysR substrate binding domain.
Lac107_00011980	100	117	58	105	0.223609	0.826377	0	0.0216378	1.73472e-18	nicotinate phosphoribosyltransferase
Lac107_00028670	792	543	539.5	456	0.226208	0.826386	0	0.0216378	1.73472e-18	DNA-binding protein, YbaB/EbfC family
Lac107_00011380	24	25	14	20	0.229662	0.826443	0	0.0216378	1.73472e-18	hypothetical protein
Lac107_00061490	69	94	51	72	0.228057	0.826692	0	0.0216378	1.73472e-18	hypothetical protein
Lac107_00039430	125	119	104	82	0.23104	0.826697	0	0.0216378	1.73472e-18	choline/carnitine/betaine transport
Lac107_00036450	73	69	50	56	0.225994	0.826705	0	0.0216378	1.73472e-18	N-acetylmuramoyl-L-alanine amidase
Lac107_00014970	5	4	9	7	0.22259	0.826718	0	0.0216378	1.73472e-18	Uncharacterized conserved protein
Lac107_00046860	39	26	27	20	0.232267	0.826737	0	0.0216378	1.73472e-18	Phosphoglycerate dehydrogenase and related dehydrogenases
Lac107_00062350	37	28	23	23	0.227862	0.826816	0	0.0216378	1.73472e-18	Protein of unknown function (DUF2892).
Lac107_00039040	95	130	62	108	0.227255	0.826862	0	0.0216378	1.73472e-18	Glutamine synthetase
Lac107_00015400	225	214	173	161	0.227919	0.827005	0	0.0216378	1.73472e-18	Outer membrane lipoprotein
Lac107_00052520	57	62	31	58	0.226492	0.827205	0	0.0216378	1.73472e-18	phosphoserine phosphatase/homoserine phosphotransferase bifunctional protein
Lac107_00051220	737	741	548	554	0.22941	0.827335	0	0.0216378	1.73472e-18	preprotein translocase, SecE subunit, bacterial
Lac107_00036840	43	50	31	36	0.222484	0.827346	0	0.0216378	1.73472e-18	Transcriptional regulators
Lac107_00003340	53	36	74	46	0.23043	0.827429	0	0.0216378	1.73472e-18	hypothetical protein
Lac107_00028290	21	28	20	14	0.234005	0.827572	0	0.0216378	1.73472e-18	Probable taurine catabolism dioxygenase
Lac107_00001970	239.5	180	317	236	0.229305	0.827839	0	0.0216378	1.73472e-18	hypothetical protein
Lac107_00035990	38	33.5	25	26	0.230262	0.827987	0	0.0216378	1.73472e-18	phosphate regulon sensor kinase PhoR
Lac107_00027170	45	19	32	14	0.227594	0.828428	0	0.0216378	1.73472e-18	hypothetical protein
Lac107_00021160	54	53	45	34	0.234661	0.828441	0	0.0216378	1.73472e-18	Predicted transcriptional regulators
Lac107_00031300	685	680	495	524	0.230927	0.828547	0	0.0216378	1.73472e-18	Response regulators consisting of a CheY-like receiver domain and a winged-helix DNA-binding domain
Lac107_00037050	375	492	278	376	0.227958	0.828641	0	0.0216378	1.73472e-18	glucose-inhibited division protein A
Lac107_00037480	2730	3218	1847.5	2448	0.233456	0.828701	0	0.0216378	1.73472e-18	transcription termination factor NusA/transcription termination factor NusA, C-terminal duplication
Lac107_00060880	8340	7732.5	5896.5	5353	0.230077	0.828731	0	0.0216378	1.73472e-18	ribosomal protein L20
Lac107_00004890	113.5	95	179	94	0.229502	0.829204	0	0.0216378	1.73472e-18	hypothetical protein
Lac107_00061800	44.5	39	28	33	0.229732	0.829225	0	0.0216378	1.73472e-18	Predicted amidohydrolase
Lac107_00015350	42	34	32	23	0.230472	0.829322	0	0.0216378	1.73472e-18	Predicted integral membrane protein
Lac107_00008350	217	262	187	176	0.23292	0.829371	0	0.0216378	1.73472e-18	hypothetical protein
Lac107_00022480	25	20	13	19	0.23968	0.829405	0	0.0216378	1.73472e-18	DNA internalization-related competence protein ComEC/Rec2
Lac107_00017050	303	382	222	294	0.231364	0.829497	0	0.0216378	1.73472e-18	phosphoribosylglycinamide formyltransferase 2
Lac107_00007010	525	552	417	393	0.233089	0.829568	0	0.0216378	1.73472e-18	hypothetical protein
Lac107_00003260	144	226	148	133	0.230826	0.829652	0	0.0216378	1.73472e-18	hypothetical protein
Lac107_00033470	1251	1543	999	1058	0.232297	0.829721	0	0.0216378	1.73472e-18	cytidylate kinase
Lac107_00050900	3233	4225	2118	3225	0.231464	0.829791	0	0.0216378	1.73472e-18	ribosomal protein L30, bacterial/organelle
Lac107_00039640	2	8	2	2	0.231161	0.829943	0	0.0216378	1.73472e-18	hypothetical protein
Lac107_00047610	22	25	15	17	0.234947	0.829997	0	0.0216378	1.73472e-18	hypothetical protein
Lac107_00019320	82	82	60	64	0.23042	0.830238	0	0.0216378	1.73472e-18	Sugar kinases, ribokinase family
Lac107_00006680	65	69	116	61	0.233753	0.830287	0	0.0216378	1.73472e-18	hypothetical protein
Lac107_00010870	286	322	240	221	0.236064	0.83059	0	0.0216378	1.73472e-18	Predicted kinase
Lac107_00000370	91	103	86	61	0.231875	0.830618	0	0.0216378	1.73472e-18	hypothetical protein
Lac107_00052200	48	47	33	37	0.23614	0.830707	0	0.0216378	1.73472e-18	Ribosome modulation factor
Lac107_00006620	240	156	305	214	0.2369	0.830744	0	0.0216378	1.73472e-18	hypothetical protein
Lac107_00064710	16	18	14	9	0.243202	0.830785	0	0.0216378	1.73472e-18	Topoisomerase IA
Lac107_00001380	343.5	208	443	287	0.235653	0.831253	0	0.0216378	1.73472e-18	hypothetical protein
Lac107_00007300	35	32	58	33	0.236618	0.831328	0	0.0216378	1.73472e-18	hypothetical protein
Lac107_00006720	365.5	485	356	287	0.236603	0.831332	0	0.0216378	1.73472e-18	hypothetical protein
Lac107_00011860	7	9	16	10	0.236504	0.83138	0	0.0216378	1.73472e-18	exodeoxyribonuclease VII, small subunit
Lac107_00020080	19	34	15	22	0.232246	0.831402	0	0.0216378	1.73472e-18	ABC-type amino acid transport/signal transduction systems, periplasmic component/domain
Lac107_00016510	43	52	37	33	0.239002	0.831519	0	0.0216378	1.73472e-18	hypothetical protein
Lac107_00025870	49	50	40	33	0.235577	0.831551	0	0.0216378	1.73472e-18	tRNA (guanine-N(7)-)-methyltransferase
Lac107_00023790	78	62	39	66	0.238076	0.83165	0	0.0216378	1.73472e-18	Carbonic anhydrases/acetyltransferases, isoleucine patch superfamily
Lac107_00054250	72	124	54	94	0.23806	0.83171	0	0.0216378	1.73472e-18	Predicted NAD/FAD-dependent oxidoreductase
Lac107_00051510	31	33	26	20	0.233776	0.831719	0	0.0216378	1.73472e-18	Molybdopterin converting factor, large subunit
Lac107_00011090	655	792.5	518	566	0.234738	0.8319	0	0.0216378	1.73472e-18	HipA N-terminal domain
Lac107_00056400	18	20	15	11	0.242803	0.832076	0	0.0216378	1.73472e-18	RND family efflux transporter, MFP subunit
Lac107_00058530	7	18	5	11	0.235235	0.832172	0	0.0216378	1.73472e-18	Predicted transcriptional regulators
Lac107_00008580	73	50	103	60	0.23236	0.83218	0	0.0216378	1.73472e-18	hypothetical protein
Lac107_00020440	10	7	11	16	0.233325	0.832372	0	0.0216378	1.73472e-18	ABC-type dipeptide/oligopeptide/nickel transport systems, permease components
Lac107_00031050	95	109	66	89	0.240578	0.832566	0	0.0216378	1.73472e-18	Sugar phosphate permease
Lac107_00057700	132	121	90	104	0.238793	0.832625	0	0.0216378	1.73472e-18	Response regulator containing CheY-like receiver domain and AraC-type DNA-binding domain
Lac107_00046400	617	477	490	335	0.235905	0.832757	0	0.0216378	1.73472e-18	translation initiation factor IF-1
Lac107_00051490	47	44	34	33	0.234393	0.832814	0	0.0216378	1.73472e-18	Uncharacterized protein conserved in bacteria
Lac107_00060960	304	363	205	300	0.236895	0.832823	0	0.0216378	1.73472e-18	Inosine-uridine nucleoside N-ribohydrolase
Lac107_00059380	50	86	40.5	62	0.238476	0.832945	0	0.0216378	1.73472e-18	formate dehydrogenase family accessory protein FdhD
Lac107_00000440	500	329.5	656.5	444	0.234087	0.833172	0	0.0216378	1.73472e-18	hypothetical protein
Lac107_00006400	450	731.5	470	419	0.236958	0.833282	0	0.0216378	1.73472e-18	replicative DNA helicase
Lac107_00028040	256	239	192	184	0.238951	0.833357	0	0.0216378	1.73472e-18	PAS domain S-box
Lac107_00002430	122	93	114	49	0.237615	0.833385	0	0.0216378	1.73472e-18	hypothetical protein
Lac107_00009180	17	17	15	8	0.23789	0.833478	0	0.0216378	1.73472e-18	hypothetical protein
Lac107_00055520	30	30	21	22	0.231694	0.833669	0	0.0216378	1.73472e-18	hypothetical protein
Lac107_00005350	152	244	142	161	0.237005	0.833789	0	0.0216378	1.73472e-18	hypothetical protein
Lac107_00038720	187	236	139	185	0.24109	0.833949	0	0.0216378	1.73472e-18	Aspartate/tyrosine/aromatic aminotransferase
Lac107_00007790	80	68	113	83	0.24102	0.834222	0	0.0216378	1.73472e-18	hypothetical protein
Lac107_00021450	49	69	35	53	0.238647	0.834292	0	0.0216378	1.73472e-18	Enoyl-CoA hydratase/carnithine racemase
Lac107_00006050	825	434	1216	469	0.239246	0.834502	0	0.0216378	1.73472e-18	hypothetical protein
Lac107_00052240	16	14	10	10	0.241749	0.834514	0	0.0216378	1.73472e-18	Levansucrase/Invertase.
Lac107_00014430	83	103	54	87	0.241418	0.834933	0	0.0216378	1.73472e-18	Serine acetyltransferase
Lac107_00047110	27	28	23	16	0.242429	0.834938	0	0.0216378	1.73472e-18	Dehydrogenases with different specificities (related to short-chain alcohol dehydrogenases)
Lac107_00014800	1306	1083	1001.5	777	0.241874	0.834943	0	0.0216378	1.73472e-18	secondary thiamine-phosphate synthase enzyme
Lac107_00040900	35	20	19	20	0.242638	0.835123	0	0.0216378	1.73472e-18	amidase, hydantoinase/carbamoylase family
Lac107_00003510	200.5	97	275	115	0.240711	0.835453	0	0.0216378	1.73472e-18	hypothetical protein
Lac107_00030060	154	193	133	131	0.236455	0.835739	0	0.0216378	1.73472e-18	Methyl-accepting chemotaxis protein
Lac107_00008380	42	21	52	33	0.240739	0.835841	0	0.0216378	1.73472e-18	Predicted acetyltransferase
Lac107_00042000	76	71	50	62	0.240797	0.835983	0	0.0216378	1.73472e-18	Response regulator containing a CheY-like receiver domain and an HTH DNA-binding domain
Lac107_00009140	53	40	66	59	0.245622	0.83603	0	0.0216378	1.73472e-18	hypothetical protein
Lac107_00007620	44	47	36	31	0.245936	0.836379	0	0.0216378	1.73472e-18	hypothetical protein
Lac107_00030190	34	41.5	20	35	0.241473	0.836386	0	0.0216378	1.73472e-18	Sugar phosphate isomerases/epimerases
Lac107_00039880	5	8	3	4	0.240632	0.836518	0	0.0216378	1.73472e-18	ectoine/hydroxyectoine ABC transporter solute-binding protein
Lac107_00036710	6	6	3	2	0.231057	0.836539	0	0.0216378	1.73472e-18	Methyltransferase small domain.
Lac107_00007440	76	57	123	51	0.245088	0.836681	0	0.0216378	1.73472e-18	hypothetical protein
Lac107_00017150	197	203	135	173	0.243988	0.837067	0	0.0216378	1.73472e-18	Protein-disulfide isomerase
Lac107_00030300	112	145	85	111	0.241657	0.837172	0	0.0216378	1.73472e-18	SOS-response cell division inhibitor, blocks FtsZ ring formation
Lac107_00044710	36	42	29	29	0.252877	0.837266	0	0.0216378	1.73472e-18	Sulfite oxidase and related enzymes
Lac107_00054520	71	109	61	77	0.254339	0.837344	0	0.0216378	1.73472e-18	dTDP-glucose 4,6-dehydratase
Lac107_00025500	73	99	60	71	0.242058	0.837369	0	0.0216378	1.73472e-18	hypothetical protein
Lac107_00064600	35	23	29	13	0.245006	0.837483	0	0.0216378	1.73472e-18	phage regulatory protein, rha family
Lac107_00050500	117	143	88	110	0.243954	0.837656	0	0.0216378	1.73472e-18	thioredoxin
Lac107_00049720	36	42	59.5	45	0.243851	0.837673	0	0.0216378	1.73472e-18	hypothetical protein
Lac107_00004390	97	138	84	96	0.247268	0.837697	0	0.0216378	1.73472e-18	hypothetical protein
Lac107_00059650	13	28	11	17	0.240664	0.838023	0	0.0216378	1.73472e-18	hypothetical protein
Lac107_00063360	461.5	549	322	446	0.248322	0.838093	0	0.0216378	1.73472e-18	fructose-bisphosphate aldolase, class II, Calvin cycle subtype
Lac107_00065470	30	41	40	55	0.243033	0.838119	0	0.0216378	1.73472e-18	hypothetical protein
Lac107_00040880	41	42	27	35	0.246394	0.83814	0	0.0216378	1.73472e-18	Predicted choline kinase involved in LPS biosynthesis
Lac107_00031540	29	27	21	19	0.244058	0.838233	0	0.0216378	1.73472e-18	fagellar hook-basal body proteins
Lac107_00033690	31	37	25	24	0.250442	0.838397	0	0.0216378	1.73472e-18	Uncharacterized conserved protein
Lac107_00035850	93	84	76	58	0.23983	0.838441	0	0.0216378	1.73472e-18	succinate CoA transferases
Lac107_00009260	608	550	452	427	0.244506	0.838465	0	0.0216378	1.73472e-18	Uncharacterized conserved protein
Lac107_00038130	153	225.5	116	174	0.245058	0.838526	0	0.0216378	1.73472e-18	Glutathione S-transferase
Lac107_00067970	3	1	0	0	0.253115	0.83858	0	0.0216378	1.73472e-18	hypothetical protein
Lac107_00041980	36	43	30	28	0.241258	0.838613	0	0.0216378	1.73472e-18	ABC-type dipeptide/oligopeptide/nickel transport systems, permease components
Lac107_00065900	71	71.5	66	41	0.239483	0.838705	0	0.0216378	1.73472e-18	hypothetical protein
Lac107_00026210	71	87	55	65	0.245838	0.838728	0	0.0216378	1.73472e-18	Phenylpropionate dioxygenase and related ring-hydroxylating dioxygenases, large terminal subunit
Lac107_00006320	931.5	897	1424.5	1032	0.246625	0.838757	0	0.0216378	1.73472e-18	RecG-like helicase
Lac107_00023960	12	12	10	5	0.248935	0.83878	0	0.0216378	1.73472e-18	putative choline sulfate-utilization transcription factor
Lac107_00001370	71	63	103	73	0.244576	0.838851	0	0.0216378	1.73472e-18	hypothetical protein
Lac107_00000300	79	51	108	63	0.243241	0.839096	0	0.0216378	1.73472e-18	hypothetical protein
Lac107_00052440	198	228	149	179	0.249681	0.839175	0	0.0216378	1.73472e-18	2-methylisocitrate dehydratase, Fe/S-dependent
Lac107_00061930	47	66	43	41	0.243251	0.839213	0	0.0216378	1.73472e-18	hypothetical protein
Lac107_00060160	61	65	52	43	0.248172	0.839264	0	0.0216378	1.73472e-18	Thiol:disulfide interchange protein
Lac107_00009920	192.5	170	307	164	0.248806	0.83937	0	0.0216378	1.73472e-18	hypothetical protein
Lac107_00019750	32	45	25	32	0.247321	0.839515	0	0.0216378	1.73472e-18	Predicted transcriptional regulators
Lac107_00001630	135	130	125	79	0.253258	0.839821	0	0.0216378	1.73472e-18	hypothetical protein
Lac107_00025510	44	68	37	47	0.246654	0.839838	0	0.0216378	1.73472e-18	Response regulator containing CheY-like receiver, AAA-type ATPase, and DNA-binding domains
Lac107_00009500	34	24	53	24	0.254142	0.840093	0	0.0216378	1.73472e-18	hypothetical protein
Lac107_00040840	61	60	50	41	0.25257	0.840273	0	0.0216378	1.73472e-18	Transcriptional regulator
Lac107_00062470	223	245	163	196	0.249368	0.840308	0	0.0216378	1.73472e-18	phosphoribosylaminoimidazole-succinocarboxamide synthase
Lac107_00037200	5	6	3	2	0.246237	0.840342	0	0.0216378	1.73472e-18	hypothetical protein
Lac107_00057450	98	75	63	69	0.247403	0.840605	0	0.0216378	1.73472e-18	PAS domain S-box
Lac107_00001340	28	10	43	10	0.251832	0.840659	0	0.0216378	1.73472e-18	hypothetical protein
Lac107_00054010	133	123	110	87	0.252228	0.840804	0	0.0216378	1.73472e-18	Predicted membrane protein
Lac107_00052080	68.5	162	72	105	0.245532	0.841002	0	0.0216378	1.73472e-18	HopJ type III effector protein.
Lac107_00005360	275	447	261	292	0.253882	0.841396	0	0.0216378	1.73472e-18	hypothetical protein
Lac107_00063550	15	18	11	11	0.251984	0.841532	0	0.0216378	1.73472e-18	hypothetical protein
Lac107_00048930	2	1	0	0	0.253163	0.841983	0	0.0216378	1.73472e-18	hypothetical protein
Lac107_00044060	122	175	90	139	0.255284	0.842007	0	0.0216378	1.73472e-18	NADH dehydrogenase, FAD-containing subunit
Lac107_00033620	360	523.5	264	409	0.253036	0.842152	0	0.0216378	1.73472e-18	Predicted sulfurtransferase
Lac107_00030090	23	29	16	20	0.254067	0.842409	0	0.0216378	1.73472e-18	ABC-type sugar transport system, ATPase component
Lac107_00014250	37	38	26	28	0.251982	0.842419	0	0.0216378	1.73472e-18	Methyl-accepting chemotaxis protein
Lac107_00039440	17	18	13	10	0.262921	0.842532	0	0.0216378	1.73472e-18	Transcriptional regulators
Lac107_00025020	21	26	18	15	0.248	0.842574	0	0.0216378	1.73472e-18	Predicted transcriptional regulators
Lac107_00030220	36	36	28	25	0.247011	0.842838	0	0.0216378	1.73472e-18	Predicted integral membrane protein
Lac107_00020230	12	17	9	9	0.258939	0.842872	0	0.0216378	1.73472e-18	hypothetical protein
Lac107_00052000	80	99	59	77	0.247955	0.842917	0	0.0216378	1.73472e-18	Dehydrogenases with different specificities (related to short-chain alcohol dehydrogenases)
Lac107_00036430	11	17	10	8	0.247641	0.842923	0	0.0216378	1.73472e-18	Putative GTPases (G3E family)
Lac107_00050570	16	16	15	30	0.250769	0.842974	0	0.0216378	1.73472e-18	Outer membrane protein W
Lac107_00044370	192	196	142.5	155	0.250819	0.843013	0	0.0216378	1.73472e-18	Membrane protein required for beta-lactamase induction
Lac107_00058520	43	35	31	26	0.246688	0.843225	0	0.0216378	1.73472e-18	Transglycosylase.
Lac107_00046150	38	33	43	53	0.254341	0.843236	0	0.0216378	1.73472e-18	type I secretion membrane fusion protein, HlyD family
Lac107_00040610	366	351	243	306	0.253247	0.843404	0	0.0216378	1.73472e-18	Uncharacterized conserved protein
Lac107_00046820	19	25	33	28	0.249366	0.843445	0	0.0216378	1.73472e-18	Uncharacterized NAD(FAD)-dependent dehydrogenases
Lac107_00053220	25	9	23	25	0.25433	0.843529	0	0.0216378	1.73472e-18	Ribbon-helix-helix protein, copG family.
Lac107_00043030	71	73	44	65	0.254243	0.843692	0	0.0216378	1.73472e-18	Uncharacterized membrane-associated protein
Lac107_00065030	196	215	147	169	0.254017	0.843727	0	0.0216378	1.73472e-18	RecA-superfamily ATPases implicated in signal transduction
Lac107_00032610	34	18	23	14	0.253411	0.843764	0	0.0216378	1.73472e-18	Alginate lyase.
Lac107_00020860	9	11	6	6	0.256004	0.843782	0	0.0216378	1.73472e-18	Zonula occludens toxin
Lac107_00059610	4	3	1	2	0.240671	0.843798	0	0.0216378	1.73472e-18	hypothetical protein
Lac107_00025620	15.5	21	12	13	0.257045	0.843813	0	0.0216378	1.73472e-18	Glycine/serine hydroxymethyltransferase
Lac107_00047510	20.5	16	11	14	0.255921	0.843841	0	0.0216378	1.73472e-18	Microcystin-dependent protein
Lac107_00058350	7	11	15	12	0.249369	0.843943	0	0.0216378	1.73472e-18	hypothetical protein
Lac107_00046410	1752	1728	1105	1482	0.254277	0.844277	0	0.0216378	1.73472e-18	ATP-dependent Clp protease ATP-binding subunit clpA
Lac107_00056390	61	66	86	79	0.251966	0.844434	0	0.0216378	1.73472e-18	Cation/multidrug efflux pump
Lac107_00035540	142	165	95	142	0.256512	0.844483	0	0.0216378	1.73472e-18	hypothetical protein
Lac107_00051170	7385	8638.5	5236.5	6172	0.254485	0.844615	0	0.0216378	1.73472e-18	ribosomal protein L7/L12
Lac107_00002580	293	516	281	339	0.251946	0.844774	0	0.0216378	1.73472e-18	hypothetical protein
Lac107_00067660	3	3	2	0	0.240509	0.844869	0	0.0216378	1.73472e-18	integrating conjugative element protein, PFL_4701 family
Lac107_00056570	215	328.5	166	254	0.258215	0.845082	0	0.0216378	1.73472e-18	hypothetical protein
Lac107_00031170	35	32	21	27	0.256647	0.845166	0	0.0216378	1.73472e-18	Transcriptional regulators of sugar metabolism
Lac107_00068360	5	9	3	4	0.261816	0.845182	0	0.0216378	1.73472e-18	Ice nucleation protein repeat.
Lac107_00040060	144	141	100	119	0.257288	0.845276	0	0.0216378	1.73472e-18	PAS domain S-box
Lac107_00000410	37	40	39	19	0.254009	0.845338	0	0.0216378	1.73472e-18	hypothetical protein
Lac107_00027140	10	20	10	10	0.260582	0.84536	0	0.0216378	1.73472e-18	Domain of unknown function (DUF3315).
Lac107_00047600	32	36	21	28	0.263231	0.845386	0	0.0216378	1.73472e-18	Transcriptional regulator of aromatic amino acids metabolism
Lac107_00003800	73	39	90	55	0.256969	0.845403	0	0.0216378	1.73472e-18
Lac107_00043630	171	197	132	150	0.256211	0.845416	0	0.0216378	1.73472e-18	hypothetical protein
Lac107_00030810	55	59	46	40	0.260883	0.845886	0	0.0216378	1.73472e-18	Transcriptional regulators
Lac107_00042150	122	137	85.5	114	0.252259	0.845913	0	0.0216378	1.73472e-18	galactarate dehydratase
Lac107_00029430	127	109	91	90	0.262836	0.845921	0	0.0216378	1.73472e-18	lipoprotein releasing system, ATP-binding protein
Lac107_00000620	2052	2120	1779.5	1313	0.257142	0.845922	0	0.0216378	1.73472e-18	hypothetical protein
Lac107_00062220	66	79.5	55	56	0.253915	0.845999	0	0.0216378	1.73472e-18	Protein of unknown function (DUF2442).
Lac107_00006280	503	362	705	430	0.257673	0.84605	0	0.0216378	1.73472e-18	FOG: EAL domain
Lac107_00063430	235	257	175	205	0.257968	0.846171	0	0.0216378	1.73472e-18	Methylase involved in ubiquinone/menaquinone biosynthesis
Lac107_00024600	447.5	408	342	311	0.255424	0.846293	0	0.0216378	1.73472e-18	SOS-response transcriptional repressors (RecA-mediated autopeptidases)
Lac107_00001030	69	74	59.5	49	0.256548	0.846431	0	0.0216378	1.73472e-18	hypothetical protein
Lac107_00054020	167	246	129	190	0.255625	0.84651	0	0.0216378	1.73472e-18	Peptidase family M48.
Lac107_00008180	1324	1346	906	1092	0.256231	0.846622	0	0.0216378	1.73472e-18	hypothetical protein
Lac107_00040100	53	84	51	54	0.256543	0.846958	0	0.0216378	1.73472e-18	hypothetical protein
Lac107_00019670	535.5	586	446	410	0.2581	0.847146	0	0.0216378	1.73472e-18	IscR-regulated protein YhgI
Lac107_00018000	144	188	110	148	0.259929	0.847178	0	0.0216378	1.73472e-18	RNA polymerase sigma factor RpoS
Lac107_00032750	65	89	54	64	0.256459	0.847515	0	0.0216378	1.73472e-18	Predicted membrane protein
Lac107_00057620	11	18	23	18	0.254684	0.847573	0	0.0216378	1.73472e-18	Endoglucanase Y
Lac107_00050820	6952.5	6917.5	4612.5	5345	0.259986	0.847659	0	0.0216378	1.73472e-18	ribosomal protein L17
Lac107_00045170	96.5	84	54	85	0.257093	0.847738	0	0.0216378	1.73472e-18	Signal transduction histidine kinase regulating C4-dicarboxylate transport system
Lac107_00052550	53	53.5	38	43	0.262279	0.847998	0	0.0216378	1.73472e-18	Universal stress protein UspA and related nucleotide-binding proteins
Lac107_00045630	50	44	31	39	0.258768	0.848016	0	0.0216378	1.73472e-18	uncharacterized phage protein (possible DNA packaging)
Lac107_00060900	12377	12245	10235.5	7160	0.261269	0.848038	0	0.0216378	1.73472e-18
Lac107_00010930	76	79	110	92	0.26495	0.848064	0	0.0216378	1.73472e-18	hypothetical protein
Lac107_00058090	42	46	57	58	0.265334	0.848176	0	0.0216378	1.73472e-18	Cold shock proteins
Lac107_00036970	3297.5	3795	2238	2956	0.261389	0.848282	0	0.0216378	1.73472e-18	ATP synthase, F1 delta subunit
Lac107_00055350	212	195	139	175	0.257443	0.848283	0	0.0216378	1.73472e-18	arginine/ornithine succinyltransferase, alpha subunit
Lac107_00006190	199	150	275	175	0.259091	0.848337	0	0.0216378	1.73472e-18	hypothetical protein
Lac107_00007530	325	513.5	310.5	332	0.258816	0.84836	0	0.0216378	1.73472e-18	Sel1 repeat.
Lac107_00067640	2	2	5	5	0.262089	0.848469	0	0.0216378	1.73472e-18	hypothetical protein
Lac107_00047440	14	13	8	9	0.260997	0.84848	0	0.0216378	1.73472e-18	Predicted permeases
Lac107_00033010	13	13	9	8	0.268512	0.848495	0	0.0216378	1.73472e-18	ABC transporter, substrate-binding protein, aliphatic sulfonates family
Lac107_00001710	233	274	205	186	0.264444	0.848545	0	0.0216378	1.73472e-18	hypothetical protein
Lac107_00041720	35	41	27	29	0.262865	0.848554	0	0.0216378	1.73472e-18	Signal transduction histidine kinase
Lac107_00061150	55	65	40	51	0.263705	0.848566	0	0.0216378	1.73472e-18	Glycosyltransferases, probably involved in cell wall biogenesis
Lac107_00032430	32	36	26	24	0.2595	0.848701	0	0.0216378	1.73472e-18	heme ABC exporter, ATP-binding protein CcmA
Lac107_00065660	352	398	266	310	0.262394	0.848843	0	0.0216378	1.73472e-18	glycine dehydrogenase (decarboxylating)
Lac107_00029860	68	47	50	38	0.262236	0.848898	0	0.0216378	1.73472e-18	TonB-dependent siderophore receptor
Lac107_00050510	49	47	38	34	0.262277	0.848941	0	0.0216378	1.73472e-18	hypothetical protein
Lac107_00020870	1	2	0	0	0.253257	0.849091	0	0.0216378	1.73472e-18	Protein of unknown function (DUF2523).
Lac107_00009050	66	37	92	44	0.266252	0.849172	0	0.0216378	1.73472e-18	drug resistance transporter, EmrB/QacA subfamily
Lac107_00066010-scaffold00052_1051	13	2	20	3	0.253712	0.849332	0	0.0216378	1.73472e-18	hypothetical protein
Lac107_00019040	25	30	20	20	0.256629	0.849367	0	0.0216378	1.73472e-18	Transcriptional regulators
Lac107_00065270	37	21	25.5	16	0.266324	0.849416	0	0.0216378	1.73472e-18	hypothetical protein
Lac107_00013440	22	24	14	18	0.267194	0.84951	0	0.0216378	1.73472e-18	malonate transporter, MadM subunit
Lac107_00025590	21	38	18	25	0.259077	0.849513	0	0.0216378	1.73472e-18	choline ABC transporter, periplasmic binding protein
Lac107_00048500	58	56	43	43	0.263065	0.849655	0	0.0216378	1.73472e-18	glucarate dehydratase
Lac107_00053330	519	475	574	726	0.266646	0.850059	0	0.0216378	1.73472e-18	hypothetical protein
Lac107_00044170	45	47.5	36	34	0.259402	0.850201	0	0.0216378	1.73472e-18	Membrane protein involved in the export of O-antigen and teichoic acid
Lac107_00044430	136	144	149	212	0.260642	0.850343	0	0.0216378	1.73472e-18	acetyl-CoA acetyltransferases
Lac107_00032540	13	22	28	21	0.264831	0.850396	0	0.0216378	1.73472e-18	Kef-type K+ transport systems, predicted NAD-binding component
Lac107_00064410	3	4	1	1	0.240416	0.850432	0	0.0216378	1.73472e-18	Uncharacterized conserved protein
Lac107_00025450	6	5	5	13	0.263271	0.850493	0	0.0216378	1.73472e-18	Transcriptional regulators
Lac107_00017210	37	36	27	27	0.263183	0.8505	0	0.0216378	1.73472e-18	Protein of unknown function (DUF3509).
Lac107_00020820	44	27	31	22	0.269448	0.850589	0	0.0216378	1.73472e-18	Response regulator containing a CheY-like receiver domain and an HTH DNA-binding domain
Lac107_00002910	77	63	132	50	0.264088	0.850961	0	0.0216378	1.73472e-18	hypothetical protein
Lac107_00058380	122.5	167	107	116	0.260672	0.850993	0	0.0216378	1.73472e-18	hypothetical protein
Lac107_00056410	29	24	16	23	0.266311	0.851085	0	0.0216378	1.73472e-18	Transcriptional regulator
Lac107_00041870	13	17	13	7	0.257049	0.851161	0	0.0216378	1.73472e-18	diguanylate cyclase (GGDEF) domain
Lac107_00044960	25	51	24	33	0.258271	0.851417	0	0.0216378	1.73472e-18	Acyl CoA:acetate/3-ketoacid CoA transferase, alpha subunit
Lac107_00063770	161	131	120	107	0.263924	0.851467	0	0.0216378	1.73472e-18	hypothetical protein
Lac107_00013940	37	30	40	50	0.267171	0.85156	0	0.0216378	1.73472e-18	type IV pilus assembly protein PilM
Lac107_00025360	117	163	99	116	0.26107	0.851575	0	0.0216378	1.73472e-18	biotin synthetase
Lac107_00055060	110.5	126.5	87	98	0.265193	0.851752	0	0.0216378	1.73472e-18	hypothetical protein
Lac107_00023210	626	651	466	512	0.268424	0.851792	0	0.0216378	1.73472e-18	Bacterial nucleoid DNA-binding protein
Lac107_00014380	16	12	13	5	0.260455	0.851815	0	0.0216378	1.73472e-18	Uncharacterized protein conserved in bacteria
Lac107_00063690	37	37	24	31	0.267781	0.852122	0	0.0216378	1.73472e-18	ABC-type amino acid transport/signal transduction systems, periplasmic component/domain
Lac107_00021330	47	74	35	57	0.258539	0.852199	0	0.0216378	1.73472e-18	Gluconolactonase
Lac107_00006340	435.5	585	374	408	0.265576	0.852204	0	0.0216378	1.73472e-18	Iron-sulfur cluster assembly accessory protein
Lac107_00062840	23	26	17	19	0.267249	0.852206	0	0.0216378	1.73472e-18	NADH:flavin oxidoreductases, Old Yellow Enzyme family
Lac107_00055110	32	40	25.5	27	0.263994	0.852232	0	0.0216378	1.73472e-18	conserved hypothetical protein, proteobacterial
Lac107_00011140	79	74	64	53	0.262651	0.852315	0	0.0216378	1.73472e-18	methylmalonic acid semialdehyde dehydrogenase
Lac107_00048690	76	58	48	55	0.266027	0.852472	0	0.0216378	1.73472e-18	Transcriptional regulator
Lac107_00061730	1	2	0	0	0.253292	0.852518	0	0.0216378	1.73472e-18	Phosphopantetheine attachment site.
Lac107_00058730	39	50	28	38	0.273512	0.852597	0	0.0216378	1.73472e-18	methyltransferase, putative
Lac107_00002270	101	163	101	104	0.267168	0.852625	0	0.0216378	1.73472e-18	hypothetical protein
Lac107_00038460	602	609	392	536	0.268824	0.85271	0	0.0216378	1.73472e-18	Small-conductance mechanosensitive channel
Lac107_00021750	19	23	8	21	0.268746	0.852889	0	0.0216378	1.73472e-18	molybdate ABC transporter, permease protein
Lac107_00044030	15	12	9	9	0.268408	0.852989	0	0.0216378	1.73472e-18	Response regulators consisting of a CheY-like receiver domain and a winged-helix DNA-binding domain
Lac107_00065380	421	261	232	295	0.269172	0.853129	0	0.0216378	1.73472e-18	hypothetical protein
Lac107_00019840	67	76	54	56	0.270872	0.853574	0	0.0216378	1.73472e-18	Peroxiredoxin
Lac107_00039150	83.5	116	65	90	0.268243	0.853624	0	0.0216378	1.73472e-18	FAD/FMN-containing dehydrogenases
Lac107_00064590	26	26	20	17	0.268543	0.853665	0	0.0216378	1.73472e-18	Protein of unknown function (DUF3158).
Lac107_00067810	9	11	8	4	0.276712	0.853667	0	0.0216378	1.73472e-18	hypothetical protein
Lac107_00056690	1	4	6	5	0.26239	0.853701	0	0.0216378	1.73472e-18	hypothetical protein
Lac107_00013730	48	39.5	59	56	0.269015	0.853928	0	0.0216378	1.73472e-18	3-oxoacyl-(acyl-carrier-protein) reductase, putative
Lac107_00029850	44	46	34	34	0.273323	0.853972	0	0.0216378	1.73472e-18	Glycerophosphoryl diester phosphodiesterase
Lac107_00009410	147	107	201	127	0.268218	0.853982	0	0.0216378	1.73472e-18	hypothetical protein
Lac107_00043170	32	31	37	47	0.267622	0.854167	0	0.0216378	1.73472e-18	lytic murein transglycosylase
Lac107_00007430	26	13	40	13	0.276513	0.854476	0	0.0216378	1.73472e-18	hypothetical protein
Lac107_00008870	305	234	242	175	0.272756	0.854562	0	0.0216378	1.73472e-18	hypothetical protein
Lac107_00021430	31	48	32	27	0.282618	0.854891	0	0.0216378	1.73472e-18	Acyl-CoA synthetases (AMP-forming)/AMP-acid ligases II
Lac107_00025910	176	151	129	127	0.269861	0.854936	0	0.0216378	1.73472e-18	monofunctional biosynthetic peptidoglycan transglycosylase
Lac107_00011290	16	13	10	9	0.272643	0.855021	0	0.0216378	1.73472e-18	ABC-type cobalamin/Fe3+-siderophores transport systems, ATPase components
Lac107_00005370	206	357	246	191	0.26973	0.855034	0	0.0216378	1.73472e-18	hypothetical protein
Lac107_00067370	91	118	68	94	0.268235	0.855175	0	0.0216378	1.73472e-18	Bacterial extracellular solute-binding proteins, family 5 Middle.
Lac107_00011200	11	6	17	8	0.268648	0.855211	0	0.0216378	1.73472e-18	ABC-type uncharacterized transport systems, ATPase components
Lac107_00031920	53	28	30	31	0.271353	0.855257	0	0.0216378	1.73472e-18	flagellar biosynthetic protein FlhB
Lac107_00027560	9	9	7	4	0.284108	0.855268	0	0.0216378	1.73472e-18	glutamine synthetase, type III
Lac107_00054880	47	56.5	41	37	0.272938	0.855433	0	0.0216378	1.73472e-18	diguanylate cyclase (GGDEF) domain
Lac107_00008130	120	81	155	105	0.270039	0.855482	0	0.0216378	1.73472e-18	hypothetical protein
Lac107_00027060	44	46	30	38	0.274394	0.855592	0	0.0216378	1.73472e-18	hypothetical protein
Lac107_00028760	45	46	35	34	0.267056	0.855612	0	0.0216378	1.73472e-18	ethanolamine permease
Lac107_00048100	639	590	463	479	0.273338	0.855691	0	0.0216378	1.73472e-18	branched-chain amino acid aminotransferase, group II
Lac107_00064340	4	6	4	1	0.283314	0.855694	0	0.0216378	1.73472e-18	hypothetical protein
Lac107_00040600	81	85	58	71	0.279462	0.855701	0	0.0216378	1.73472e-18	Leucine Rich Repeat./Protein kinase domain.
Lac107_00056600	194	288	145	230	0.27404	0.855991	0	0.0216378	1.73472e-18	phosphoglucomutase, alpha-D-glucose phosphate-specific
Lac107_00063170	37	43	29	31	0.278338	0.856033	0	0.0216378	1.73472e-18	Dioxygenases related to 2-nitropropane dioxygenase
Lac107_00035860	202	201	123	189	0.268634	0.856068	0	0.0216378	1.73472e-18	Uncharacterized conserved small protein
Lac107_00004570	29	25	45	29	0.271259	0.856114	0	0.0216378	1.73472e-18	hypothetical protein
Lac107_00034360	42	60	34	44	0.274646	0.856215	0	0.0216378	1.73472e-18	Uncharacterized protein conserved in bacteria
Lac107_00021320	20	24	30	29	0.269737	0.856276	0	0.0216378	1.73472e-18	Uncharacterized conserved protein
Lac107_00038600	534	824	393	649	0.274698	0.856577	0	0.0216378	1.73472e-18	gamma-aminobutyrate permease
Lac107_00039600	4	4	1	2	0.28377	0.856816	0	0.0216378	1.73472e-18	ABC-type sugar transport system, periplasmic component
Lac107_00019510	109	145	82	115	0.273969	0.856933	0	0.0216378	1.73472e-18	Enoyl-CoA hydratase/carnithine racemase
Lac107_00035620	555	665	400.5	537	0.277239	0.857114	0	0.0216378	1.73472e-18	(p)ppGpp synthetase, RelA/SpoT family
Lac107_00024380	22	11	23	23	0.273479	0.857145	0	0.0216378	1.73472e-18	hypothetical protein
Lac107_00023980	51	58	48	35	0.26882	0.857303	0	0.0216378	1.73472e-18	choline ABC transporter, periplasmic binding protein
Lac107_00009520	82	41	97	62	0.273039	0.857533	0	0.0216378	1.73472e-18	Holliday junction DNA helicase, RuvB subunit
Lac107_00033450	226	261	205	173	0.274781	0.857765	0	0.0216378	1.73472e-18	integration host factor, beta subunit
Lac107_00001810	116	93	138	131	0.277657	0.857906	0	0.0216378	1.73472e-18	hypothetical protein
Lac107_00030180	25	40	17	31	0.286115	0.858003	0	0.0216378	1.73472e-18	Uncharacterized enzyme involved in inositol metabolism
Lac107_00018700	3	3	3	8	0.262569	0.85811	0.00333333	0.0277687	0.000391473	hypothetical protein
Lac107_00051950	52	31	36	26	0.277417	0.85812	0	0.0216378	1.73472e-18	Glycosyltransferases, probably involved in cell wall biogenesis
Lac107_00054050	20	32	19	19	0.277142	0.858213	0	0.0216378	1.73472e-18	hypothetical protein
Lac107_00061450	154	173	103	152	0.272781	0.858257	0	0.0216378	1.73472e-18	tRNA dihydrouridine synthase A
Lac107_00036960	7089.5	7846	4723	6093	0.275877	0.858278	0	0.0216378	1.73472e-18	proton translocating ATP synthase, F1 alpha subunit
Lac107_00056580	144	170	118	126	0.28136	0.858298	0	0.0216378	1.73472e-18	hypothetical protein
Lac107_00066750	18	18	10	15	0.275731	0.858391	0	0.0216378	1.73472e-18	Non-ribosomal peptide synthetase modules and related proteins
Lac107_00042110	35	40	17	39	0.277521	0.858507	0	0.0216378	1.73472e-18	Predicted permeases
Lac107_00015030	16	14	21	21	0.27777	0.858509	0	0.0216378	1.73472e-18	endonuclease III
Lac107_00010000	1094	1614	1015.5	1040	0.278517	0.858515	0	0.0216378	1.73472e-18	formamidopyrimidine-DNA glycosylase (fpg)
Lac107_00036630	129	92	81	91	0.273529	0.858811	0	0.0216378	1.73472e-18	Methyl-accepting chemotaxis protein
Lac107_00057460	47	33	31	29	0.272035	0.858863	0	0.0216378	1.73472e-18	hypothetical protein
Lac107_00051420	69	85	59	60	0.278676	0.858954	0	0.0216378	1.73472e-18	amine acid ABC transporter, permease protein, 3-TM region, His/Glu/Gln/Arg/opine family
Lac107_00013340	227.5	278	175	218	0.275631	0.858981	0	0.0216378	1.73472e-18	adenosylhomocysteinase
Lac107_00048030	469	485	340	397	0.274935	0.859031	0	0.0216378	1.73472e-18	cytochrome o ubiquinol oxidase subunit II
Lac107_00047290	17	24	16	12	0.278051	0.859037	0	0.0216378	1.73472e-18	hypothetical protein
Lac107_00029660	16	13	11	8	0.278379	0.859248	0	0.0216378	1.73472e-18	Glycosyltransferases involved in cell wall biogenesis
Lac107_00062870	10	12	6	7	0.277644	0.85929	0	0.0216378	1.73472e-18	Predicted transcriptional regulators
Lac107_00041920	15	11	8	10	0.285603	0.859312	0	0.0216378	1.73472e-18	Na+/H+ antiporter NhaA
Lac107_00026990	2	1	6	1	0.283671	0.859382	0	0.0216378	1.73472e-18	hypothetical protein
Lac107_00056810	18	17	15	9	0.273711	0.859495	0	0.0216378	1.73472e-18	Fatty acid desaturase
Lac107_00003730	73	99	75	58	0.271999	0.859519	0	0.0216378	1.73472e-18	hypothetical protein
Lac107_00021190	159	182	99	167	0.279746	0.859567	0	0.0216378	1.73472e-18	Phenylpropionate dioxygenase and related ring-hydroxylating dioxygenases, large terminal subunit
Lac107_00009530	84	143	101	76	0.28142	0.859569	0	0.0216378	1.73472e-18	hypothetical protein
[truncated: 4,546 more rows]

## Sheet: PsyB728a
Query locus tag	median_3:EV norm	median_4:EV norm	median_1:HrpL norm	median_2:HrpL norm	median_P-val	median_Q-val	b_value	b_value_UL	b_value_LL	Query annotation
[truncated: 5,061 more rows]

[truncated: 4 more sheets: Pjap, Por, Pto_NCBI, Pto_Draft]
