# Supplementary material for: Variable Suites of Non-effector Genes Are Co-regulated in the Type III Secretion Virulence Regulon across the Pseudomonas syringae Phylogeny
Source: PLoS Pathog. 2014 Jan 2;10(1):e1003807. doi: 10.1371/journal.ppat.1003807 (PMC3879358; doi:10.1371/journal.ppat.1003807)
Supplement: Table S9 — List of primers and sequences used in this study. (XLSX) [file ppat.1003807.s019.xlsx]

## Sheet: Sheet1
	Primer name	Sequence	Description
qRT-PCR primers	MT485	ATGACCACCATTCATGCCTA	+ sense gap-1 Pto DC3000 and Por nt529
	MT486	GTACGGGTCGGTGTGATAGA	- sense gap-1 Pto DC3000 and Por nt 575
	MT394	GGCTTGCGGCGTTAGCTCCA	+ sense PSPTO_4332 nt 395
	MT395	ACCCGGTTGGCGTTGTCGTC	- sense PSPTO_4332 nt 506
	MT497	ATCCGGAATTCGAAGTGGT	+ sense PSPTO_2130/ Pjap_00016990 nt 80
	MT498	TGCGTTGTTGAAGAATACGC	- sense PSPTO_2130 nt 207
	MT808	TCAAGGTGCTGTGCAAGATT	+ sense PSPTO_3086 nt 218
	MT809	ACCAGTCGCTTGCTGTGTT	- sense PSPTO_3086 nt 314
	MT390	GAGGAGCGCTTGCGGCTGAT	+ sense PSPTO_2129 nt 715
	MT391	CCTTGATGCGTTCGGCGCCT	- sense PSPTO_2129 nt 823
	MT465	ATCGAAGTGTTGCTGCTGAC	+ sense PSPTO_2208 nt 1384
	MT466	CCTTCTTTGTCCTTGGCAAT	- sense PSPTO_2208 nt 1534
	MT503	CGGGCCTATCAACTCTAAGG	+ sense PSPTO_0871 nt 560
	MT504	ACAATGGCACCAATGTGAAC	- sense PSPTO_0871 nt 678
	MT678	GAGTGCCAGATCTACACCGA	+ sense PSPTO_1843 nt 502
	MT679	CCATTTCCAGCATCTCTTCA	- sense PSPTO_1843 nt 591
	MT686	GCAAAGCCAGCTCTATCACA	+ sense PSPTO_4716 nt 308
	MT687	ACAGTCGATCCCTGTTCGAT	- sense PSPTO_4716 nt 418
	MT611	CGTCCTACGCGCACTGTATA	+ sense gap-1 for Pph1448A and PsyB728a nt 48
	MT612	GCCGCTGAAAGGGCCGTGTA	- sense gap-1 for Pph1448A and PsyB728a nt 158
	MT414	TTTCGGAGCGCCACTTGGGC	+ sense PSPPH_A0112 nt 236
	MT415	CCCGACTCCCCTCCGGATGG	-sense PSPPH_A0112 nt 337
	MT1185	GCCCAATGTGTTGATACTGC	- sense PSPPH_A0110 nt 609
	MT1186	GCTTCATACCGATGGTTCCT	+ sense PSPPH_A0110 nt 399
	MT412	GGTGCAGGACACGACGGCAG	+ sense PSPPH_A0109 nt 270
	MT413	GCTAAGGCGCCCCACACGTT	-sense PSPPH_A0109 nt 410
	MT547	GGTGCTGTTCAAGGCTTCTT	+ sense PSPPH_1906 nt 277
	MT548	GAATTCTCCAGCAGCGTATG	- sense PSPPH_1906 nt 442
	MT479	CAATCCCGCCTTTAGAGATG	+ sense PSPPH_0762 nt 116
	MT480	TTTGGTGAATCAAGGCACTG	-sense PSPPH_0762 nt 204
	MT1168	CCATACATGCCATCAACCAT	+ sense PSPPH_A0106 nt 476
	MT1169	GCCCATTAATCCAGTCCATC	- sense PSPPH_A0106 nt 546
	MT1178	TATCTAATACGCCGCGACTG	+ sense PSPPH_A0108 nt 11
	MT1179	TCGACCCGTATCATCGTAGA	- sense PSPPH_A0108 nt 104
	MT897	ATTCTGAGCGCATCCTTTG	+ sense Psyr_0027 nt 37
	MT898	CTCCAGCTTGGTCGGATATT	- sense Psyr_0027 nt 113
	MT1465	CCAAACAACCAACAATGGAG	+ sense Psyr_0737 nt 154
	MT1466	GCCACAAATGCATTACCTGT	- sense Psyr_0737 nt 256
	MT1138	AACCGTACGGCTCTCTGAAT	+ sense PORcurated_00518 nt 24
	MT1139	CCATTGTTGCTCCACTCATATT	- sense PORcurated_00518 nt 95
	MT1030	ATGGAATGGATTGAGATCGG	+ sense PORcurated_04644 nt 52
	MT1031	ACAACTCGACTCCGCCTATT	- sense PORcurated_ 04644 nt 138
	MT920	CATCGGGCAGTTATGCTATG	+ sense PORcurated_03530 nt 537
	MT921	TCTGTTACTTCGGGCTCCTT	- sense PORcurated_03530 nt 646
	MT1040	CACCGAAGAACAGAAGCGTA	+ sense PORcurated_04640 nt 27
	MT1041	CTCCCGACTGCTTGTTGAC	- sensePORcurated_04640 nt 124
	MT936	AAACAGCGAGATACGTAAGGC	+ sense PORcurated_04022 nt 136
	MT937	AGATGTCCCTCCATCAGGAC	- sense PORcurated_04022 nt 250
	MT1038	CGTGGAAGCAAGGACAAATA	+ sense PORcurated_04648 nt 7
	MT1039	GTACGCCTTTGTGCTCGTAA	- sense PORcurated_04648 nt 69
	MT1032	GACTGTGTGACGCTGGAGTT	+ sense PORcurated_04371 nt 169
	MT1033	CCCTTCGTGACAGTAGGCTT	- sensePORcurated_04371 nt 221
	MT948	GTAGTCCTGGCTCTGGCAAT	+ sense PORcurated_04025 nt 19
	MT949	CGCATACTCCTGAGGGTTCT	- sense PORcurated_04025 nt 104
	MT944	ATGTTGCAGGTCTGAGAGCA	+ sense PORcurated_04024 nt 230
	MT945	AATTCGTACACCAGCGTGAG	- sense PORcurated_04024 nt 283
hrpL cloning	MT66	TCTAGATTTAAGAAGGAGATATACATATGCTCCCGAATCTTGTGATCC	+ sense, XbaI, Shine and Delgarno, NdeI +ATG, + 4-22 nt of hrpL PsyB728a
	MT67	AAGCTTTCAGGCGAACGGGTCTATGTG	-sense last 21 nt of hrpL B728a + HindIII
	MT68	TCTAGATTTAAGAAGGAGATATACATATGTTTCAGAAACTCGTGATTC	+ sense, XbaI, Shine and Delgarno, NdeI +ATG, + 4-22 nt of hrpL Por
	MT69	AAGCTTTCAGGCGAATGGATCGATTTGC	-sense last 22 nt of hrpL Por + HindIII
	MT70	TCTAGATTTAAGAAGGAGATATACATATGTTTCCGAACCTAGTGATC	+ sense, XbaI, Shine and Delgarno, NdeI +ATG, + 4-22 nt of hrpL Pph1448A
	MT71	AAGCTTTCAGGCGAACGGGTCAATCTGC	-sense last 22 nt of hrpL Pph1448A + HindIII
	MT78	TCTAGATTTAAGAAGGAGATATACATATGTTTCCCAACCTTGTGATC	+ sense, XbaI, Shine and Delgarno, NdeI +ATG, + 4-22 nt of hrpL Pla107
	MT79	AAGCTTTCAGGCGAACGGGTCAATCTGC	-sense HindIII + last 22nt of hrpL Pla107
	MT154	TCTAGATTTAAGAAGGAGATATACATATGCTCCCGAATCTTGTGATCC	+ sense, XbaI, Shine and Delgarno, NdeI +ATG, +4-22 nt of hrpL Pjap
	MT155	AAGCTTCAGGCGAACGGGTCTATC	- sense HindIII + hrpL Pjap last 20nt
PSPTO_2105 ortholog qRT	MT1060	GTACGCTGGTGGGTTATCG	+ sense PSPTO_2105 nt 499
	MT1061	CCGCTCAGTGATACGGTCTA	- sense PSPTO_2105 nt 551
	MT1062	CACGATTATCTGGTGCAAGC	+ sense PSPPH_1855 nt 550
	MT1063	GGTAGACAGGGCGTAACCAT	- sense PSPPH_1855 nt 680
	MT1068	GCAGTCATTATTCCGTGGTG	+ sense Psyr_1900 nt 68
	MT1069	CTGCTGATCGACCTCGTCTA	- sense Psyr_1900 nt 149
	MT1074	TAGCGACTCGGACATTGAAC	+ sense PORcurated_00488 nt 243
	MT1075	AAGCTTGAGGATTGATTCGG	- sense PORcurated_00488 nt 302
	MT1080	GTGCAAGTGGACCTCAACAG	+ sense Lac107_00029380 nt 472
	MT1081	CACCAGATAATCGTGCAACC	- sense Lac107_00029380 nt 545
	MT1090	GAATCAACAGCAGGGAGGAC	+ sense Pjap_00017280 nt 135
	MT1091	TACACCGACCATGAAGGATG	- sense Pjap_00017280 nt 257
PSPTO_2130 ortholog qRT	MT778	CCCGCAAGGTCATTATCTC	+ sense Pla107 gap-1 nt 350
	MT779	GTGTCGTGGTTGACACCATAG	- sense Pla107 gap-1 nt 402
	MT784	AATGCACCGGTCTGTTCAC	+ sense Pjap gap-1 nt 292
	MT785	GTGTCGTGGTTGACACCATAG	- sense Pjap gap-1 nt 401
	MT565	CTGTTCAGTGCTTCTTCACCA	+ sense Psyr_1940 nt 281
	MT566	GGGCTACCTGCTCAAGGAT	- sense Psyr_1940 nt 346
	MT790	ATGCCGGGTCTGAAAGTAGT	+ sense PORcurated_00527 nt 226
	MT791	CAATCACTTCATCGCGACTC	- sense PORcurated_00527 nt 327
	MT713	TGCGTTGTTGGAGAATCCGC	- sense Pjap_00016990 to use with MT497
	MT545	GTTGCAGTTCCTGGCACA	+ sense Lac107_00061530/ PSPPH_1906 nt 519
	MT546	ACTGACACTGTGCGACTGGT	- sense Lac107_00061530/ PSPPH_1906 nt 647
LuxR operon qRT	MT521	GTTTCCAGCAGGTTCCAGAT	+ sense PSPTO_2128 nt 89
	MT522	CAATGACTACCTGCCGATCA	- sense PSPTO_2128 nt 216
	MT386	GCTGGCCATCGGTCCGCAAT	+ sense PSPTO_2131 nt285
	MT387	TTCACCATCGGGTGCGCTGA	- sense PSPTO_2131 nt429
	MT535	ATTCGGGCATGTGTAGATCA	+ sense PSPPH_1904 nt 282
	MT536	CCTTGATCTGATGGAGCAAC	- sense PSPPH_1904 nt 399
	MT541	GCGTACATCTTCCTCTGCCT	+ sense PSPPH_1905 nt 2185
	MT542	CTGGCGATTCTCATGTTCTC	- sense PSPPH_1905 nt 2243
	MT551	GAAATCATCCAGCACGCTT	+ sense PSPPH_1907 nt 409
	MT552	ACCTGCAAGCCATTCTCAA	- sense PSPPH_1907 nt482
	MT555	CATGATCGGCAGGTAGTCAT	+ sense Psyr_1938 nt 214
	MT556	ACCTTGTTGTGCTCGATCTG	- sense Psyr_1938 nt 295
	MT561	GTGTTGCGGACACTCCTGT	+ sense Psyr_1939 nt 1360
	MT562	CGAACGTATCAAGGGCTACA	- sense Psyr_1939 nt 1425
	MT575	GGACATGGTCTGCTCTCTGA	+ sense Psyr_1941 nt 658
	MT576	GGACAACGAGGACATCGAG	- sense Psyr_1941 nt 748
Primers for putative effector cloning	MT1621	caccAACTGCGCCGCCTTGAAAGTC	+ sense cacc +upstream region including hrp box of PORcurated_02784 for pENTR cloning
	MT1421	CACCATGCCAGCAATGGTCTTTACC	- sense last nt of PORcurated_02784 -stop codon for pENTR cloning
	MT1630	caccGCTGCTTTCACCCGATTGCAA	+ sense cacc + upstream region including hrp box of PORcurated_04644 for pENTR cloning
	MT1631	ATGCTTTGGCCGGGCGCTGATTA	- sense last nt of PORcurated_04644 -stop codon for pENTR cloning
	MT1644	GGGGACAAGTTTGTACAAAAAAGCAGGCTCCTGAGACTACCGGAGGATCCTATG	+ sense BU site + upstream region including hrp box of PORcurated_04640 for cloning in pDEST207
	MT1645	AGATTGGGGACCACTTTGTACAAGAAAGCTGGGTGTGAGGTCACCAACTGTTTGATCTTC	- sense BU site + PORcurated_04640 -stop for cloning in pDEST207
	MT1652	CACCGCCCGGGATTGGGAGCGCAGCAACAAG	+ sense cacc + upstream region including hrp box of PORcurated_003530 for pENTR cloning
	MT1653	CGTTACCGACGTATCGTGGATGGCCAG	- sense last nt of PORcurated_03530 -stop for pENTR cloning
	MT1649	caccGCAGTAACAATTACATTCGGGGC	+ sense cacc upstream region including hrp box of PORcurated_01245 for pENTR cloning
	MT1651	TTCGGAAAACGACGACGTTTTCACTG	- sense last nt of PORcurated_01245 -stop for pENTER cloning
	MT1624	caccCCTGCGAGATCCAAAACTGCCGC	+ sense cacc + upstream region including hrp box of PORcurated_04371 for pENTR cloning
	MT1625	GTTGCCCACTCGCTTGAACCAGTA	- sense last nt of PORcurated_04371 -stop codon for pENTR cloning
Intragenic regions	MT1200	ATGTCGACGACCCTGCCAGGCCTCG	- sense PSPPH_A0110 nt 89
	MT1201	TTACTGTCCAAGCTGCCGCCCATCC	+ sense PSPPH_A0109 nt 749
	MT1190	AATGTTGGCACGATGACAGT	+ sense PSPPH_A0113 nt 412
	MT415	CCCGACTCCCCTCCGGATGG	-sense PSPPH_A0112 nt 337
KO primers	MT449	AGCTCCCAGGTTCTGCAGTGATGACGACCCATAAAGCACGTG	-sense overlapping PSPPH_A0106-A0108
	MT450	GGGTCGTCATCACTGCAGAACCTGGGAGCTTACTGTTGCG	+ sense overlapping PSPPH_A0106-A0108
	MT597	GGGGACAAGTTTGTACAAAAAAGCAGGCTCCGGGCCCATAAACGCGAGCAAGCGGG	+ sense + full attB site for BP cloning of PSPPH_A0107 KO clone
	MT598	AGATTGGGGACCACTTTGTACAAGAAAGCTGGGTGTCCTACGGGAATTGTCTGCGCTAGC	- sense + full attB site for BP cloning of PSPPH_A0107 KO clone
	MT1269	cacCATCAGCTCAGTTGTCACCGCCACTG	+ sense ccac ~600bp upstream of avrD
	MT1270	TGTTTTTTTCCGGACGCATAGGATACATTCCTTATAAACCATTGTT	- sense overlapping primer for avrD KO
	MT1271	GGTTTATAAGGAATGTATCCTATGCGTCCGGAAAAAAACAGCTGCT	+ sense overlapping primer for avrD KO
	MT1279	GGACAAAACGCTCCAACGCTGAACGACCCGACTC	- sense ~600bp downstream of avrD
Synthetic sequences generated
	PorhrpL _KO-seq	CCTGCGGGTCGACGCTGGCAGGCGACAACGCAGCAGGGGTCACGACGCGGTTTGGCGTTACCGGAAGTATCTGCATGGGAGGCGGAGCGACGATTTTCATAGGGCTGTTCTGAGTCAGATCATGCCTGTTGAGTGGGTCATGGTCGCTGTTCGGTTCCCTATGGGAAAGCCTTCATGTGTTCGTGCCAAAAGTTGCTTGCGTAAATCGTGCGTCACGCAAAAAAATGTATTACAAAGAATTACAAATTTTTAATTTTCTATTAATATCAACAGGTTGCGTTTTATTTTTTGCTGGCACGGTTATCGCTATAGGGCTTACACACCACCATTAAAGGGTAAGCCCGCGACGCTTTTTGATGACTTTTCTGGAACCAACGCAGTCGCTCAACCACACAGTTG…
	PsyB728ahrpL_KO-seq	TCGCCGTCAGCGAATTCCAGAACCTGTTCCAGATCGGCGTCGTTGTCCTGCAGCAGTTTTTTGCGCAGCAGTCTGGCGGCGTTATCCAGCCCGGTGTCGCTGGCGCTCATCAGCAACTGATAAAGCTCGCCCAGCTTGACGGCCCGCGACTGCAGCGCGTTCCTGCTCGCGATCAGTTCTCGCTCACGCAGGATCCGGCTGTGCTGCACCAGTGCTGCGGCGAAGCGCGAAACCTGCAGTGACGAGGTGCCTTTTTCATCAGGCAACCCGCCGCCGGGAATCGCTCGCGCAGCCGGCGTGATGGCGCGGATTGGCGCTACCGGACGAATGGGCAATGTAGGCGGGGCGACAATTTTCATAGGACGATTCTGGGCCTGGTGTGACCGCTGAGTGGGTCGT…
	PSPPH_1855_KO-seq	TCAGGAAGCCTGCGCCGAAGGTCGCCAGCGACAGCATCAACGAAGCGAATGCGCTGTAGGATGGGAAAAATGTCTTGGCAATGGCCGTGGCGTAAAAGCCGTAGACCATGAAATCGAACATCTCGAGGAAGTTACCGCTGACAACGCGAAAGATCGCTTTGCCCTTACTTGTTGTGGAGGCCATTAGTTACTCGCTCAGGCTCGTCGGCTTGGAGTCCGTTGTCGTTTTTTTATCCCGTTTACATCGCCATTACGTATGTGCGACTGGCGATGCACATTTGTAACGGTATGTGTAACAGGGCTCAAAGACAACCGTTTCGGCGATTTGCTATTACTTAACAGACGCTTGACAGGTATAGCCGGTCGATGCGTGCACGGCTTATCAACCAGATGAAACCG…
